# Supplementary material for: Optimizing de novo genome assembly from PCR-amplified metagenomes
Source: PeerJ. 2019 May 9;7:e6902. doi: 10.7717/peerj.6902 (PMC6511391; doi:10.7717/peerj.6902)
Supplement: Table S2 — The first tab lists the different steps and tools tested. The second tab includes the results of de novo genome assembly with the different pipelines for each PCR-amplified library, alongside the estimated ratio of incomplete genes predicted from these contigs. For the 25 PCR-amplified libraries for which an unamplified reference was available, this second tab also includes estimates of assembly errors for each assembly pipeline obtained with QUAST. For the 82 non-viral libraries, the second tab includes the estimated number of bacterial/archaeal genomes and results from genome binning. [file peerj-07-6902-s006.xls]

## Sheet: Assembly code
Read correction	Software	Parameter	Note
Strict	bfc & seqtk	bfc: -1 -s 10g -k 21, seqtk: dropse	Remove reads with unique kmers, and drop unpaired reads afterwards
Relaxed	tadpole.sh (bbtools)	mode=correct ecc=t prefilter=2	Error correction via k-mer counts, ignore kmers with depth ≤ 2
Read selection	Software	Parameter
Read deduplication	clumpify.sh (bbtools)	dedupe subs=0 passes=2	Remove exact duplicates (forward and reverse reads, no substitution allowed)
Read normalization	bbnorm.sh (bbtools)	bits=32 min=2 target=100	Normalize reads to a defined depth target (here 100). Kmers with depth ≤ 2 will not be used when calculating depth of a read
Assembly type	Software	Parameter	Note
Metagenome option	SPAdes	--meta --only-assembler -k 21,33,55,77,99,127	Parameters optimized for (non-amplified) metagenomes (option “meta”)
Single-cell option	SPAdes	--sc --only-assembler -k 21,33,55,77,99,127	Parameters optimized for single-cell amplified genomes (option “sc”)
Assembly pipelines
Code	Read correction	Read reduction	Assembly type
Strict-None-Meta	Strict (bfc)	None	Metagenome option
Strict-Dedup-Meta	Strict (bfc)	Read deduplication (clumpify)	Metagenome option
Strict-Norm-Meta	Strict (bfc)	Read normalization (bbnorm)	Metagenome option
Strict-None-SingleCell	Strict (bfc)	None	Single-cell option
Strict-Dedup-SingleCell	Strict (bfc)	Read deduplication (clumpify)	Single-cell option
Strict-Norm-SingleCell	Strict (bfc)	Read normalization (bbnorm)	Single-cell option
Relaxed-None-Meta	Relaxed (tadpole)	None	Metagenome option
Relaxed-Dedup-Meta	Relaxed (tadpole)	Read deduplication (clumpify)	Metagenome option
Relaxed-Norm-Meta	Relaxed (tadpole)	Read normalization (bbnorm)	Metagenome option
Relaxed-None-SingleCell	Relaxed (tadpole)	None	Single-cell option
Relaxed-Dedup-SingleCell	Relaxed (tadpole)	Read deduplication (clumpify)	Single-cell option
Relaxed-Norm-SingleCell	Relaxed (tadpole)	Read normalization (bbnorm)	Single-cell option

## Sheet: Assembly metrics
Library	Assembly code	Project	Sample name	Sample type	Library type	Number of PCR cycles	Read correction	Read selection	Assembly type (SPAdes option)	Total bp in contigs	Total bp in contigs ≥ 1kb	Total bp in contigs ≥ 10 kb	Total number of contigs	N50 (bp)	N90 (bp)	Maximum contig size (bp)	Estimated number of misassemblies (contigs ≥ 1kb only)*	Estimated error rate (number of misassemblies per Mb)*	Percentage of genes predicted as partial	Estimated total number of bacterial / archaeal genomes	Number of high-quality genome bins	Number of medium-quality genome bins	Number of low-quality genome bins
BPGOW	Strict-None-Meta	SPOT_CSP2799	5SPOviralmetaG_FD	Virus fraction	Accel-NGS 1S Plus	15	Strict	None	Metagenome	354186468	110748431	978937	620699	617	311	58333			0.550181
BPGOW	Strict-Dedup-Meta	SPOT_CSP2799	5SPOviralmetaG_FD	Virus fraction	Accel-NGS 1S Plus	15	Strict	Read deduplication	Metagenome	362809232	175595152	16255465	494037	945	323	75520			0.417507
BPGOW	Strict-Norm-Meta	SPOT_CSP2799	5SPOviralmetaG_FD	Virus fraction	Accel-NGS 1S Plus	15	Strict	Read normalization	Metagenome	352216371	110745580	879227	615535	620	311	41310			0.547319
BPGOW	Strict-None-SingleCell	SPOT_CSP2799	5SPOviralmetaG_FD	Virus fraction	Accel-NGS 1S Plus	15	Strict	None	Single-cell	380170134	179604680	41508545	519253	902	323	92577			0.378169
BPGOW	Strict-Dedup-SingleCell	SPOT_CSP2799	5SPOviralmetaG_FD	Virus fraction	Accel-NGS 1S Plus	15	Strict	Read deduplication	Single-cell	414623766	199571744	65971963	550365	928	326	777483			0.33503
BPGOW	Strict-Norm-SingleCell	SPOT_CSP2799	5SPOviralmetaG_FD	Virus fraction	Accel-NGS 1S Plus	15	Strict	Read normalization	Single-cell	377267608	179470025	41922967	511942	913	324	129960			0.377689
BPGOW	Relaxed-None-Meta	SPOT_CSP2799	5SPOviralmetaG_FD	Virus fraction	Accel-NGS 1S Plus	15	Relaxed	None	Metagenome	404302743	145889297	2101681	679159	670	311	54646			0.511528
BPGOW	Relaxed-Dedup-Meta	SPOT_CSP2799	5SPOviralmetaG_FD	Virus fraction	Accel-NGS 1S Plus	15	Relaxed	Read deduplication	Metagenome	411542214	202693886	33256610	549899	971	323	90282			0.392432
BPGOW	Relaxed-Norm-Meta	SPOT_CSP2799	5SPOviralmetaG_FD	Virus fraction	Accel-NGS 1S Plus	15	Relaxed	Read normalization	Metagenome	396642375	145373932	2047510	659754	682	312	89342			0.504963
BPGOW	Relaxed-None-SingleCell	SPOT_CSP2799	5SPOviralmetaG_FD	Virus fraction	Accel-NGS 1S Plus	15	Relaxed	None	Single-cell	437717510	208480410	53388255	594009	913	322	144152			0.372063
BPGOW	Relaxed-Dedup-SingleCell	SPOT_CSP2799	5SPOviralmetaG_FD	Virus fraction	Accel-NGS 1S Plus	15	Relaxed	Read deduplication	Single-cell	478433690	226205726	76633408	647193	894	323	939410			0.334777
BPGOW	Relaxed-Norm-SingleCell	SPOT_CSP2799	5SPOviralmetaG_FD	Virus fraction	Accel-NGS 1S Plus	15	Relaxed	Read normalization	Single-cell	426421895	207535866	53688674	567191	949	325	147528			0.357242
BPGPC	Strict-None-Meta	SPOT_CSP2799	12SPOviralmetaG_FD	Virus fraction	Accel-NGS 1S Plus	15	Strict	None	Metagenome	283133011	87350132	1284211	498690	610	310	50701			0.499466
BPGPC	Strict-Dedup-Meta	SPOT_CSP2799	12SPOviralmetaG_FD	Virus fraction	Accel-NGS 1S Plus	15	Strict	Read deduplication	Metagenome	293147749	133072804	7524898	423631	856	318	41138			0.397525
BPGPC	Strict-Norm-Meta	SPOT_CSP2799	12SPOviralmetaG_FD	Virus fraction	Accel-NGS 1S Plus	15	Strict	Read normalization	Metagenome	281065243	87255763	1071653	493394	614	310	43008			0.49401
BPGPC	Strict-None-SingleCell	SPOT_CSP2799	12SPOviralmetaG_FD	Virus fraction	Accel-NGS 1S Plus	15	Strict	None	Single-cell	307423828	141554781	24669594	432892	865	320	73851			0.373369
BPGPC	Strict-Dedup-SingleCell	SPOT_CSP2799	12SPOviralmetaG_FD	Virus fraction	Accel-NGS 1S Plus	15	Strict	Read deduplication	Single-cell	340067830	155739255	41013762	478257	850	319	153255			0.337829
BPGPC	Strict-Norm-SingleCell	SPOT_CSP2799	12SPOviralmetaG_FD	Virus fraction	Accel-NGS 1S Plus	15	Strict	Read normalization	Single-cell	304087576	141532762	25111241	423740	880	321	85491			0.366248
BPGPC	Relaxed-None-Meta	SPOT_CSP2799	12SPOviralmetaG_FD	Virus fraction	Accel-NGS 1S Plus	15	Relaxed	None	Metagenome	333166379	120625766	2785553	556677	667	310	101589			0.457366
BPGPC	Relaxed-Dedup-Meta	SPOT_CSP2799	12SPOviralmetaG_FD	Virus fraction	Accel-NGS 1S Plus	15	Relaxed	Read deduplication	Metagenome	345156678	158886268	17829499	493343	866	316	57549			0.381405
BPGPC	Relaxed-Norm-Meta	SPOT_CSP2799	12SPOviralmetaG_FD	Virus fraction	Accel-NGS 1S Plus	15	Relaxed	Read normalization	Metagenome	323044368	119985719	2441042	530545	688	313	52887			0.460282
BPGPC	Relaxed-None-SingleCell	SPOT_CSP2799	12SPOviralmetaG_FD	Virus fraction	Accel-NGS 1S Plus	15	Relaxed	None	Single-cell	368668513	167867533	34753607	524183	846	318	107559			0.361227
BPGPC	Relaxed-Dedup-SingleCell	SPOT_CSP2799	12SPOviralmetaG_FD	Virus fraction	Accel-NGS 1S Plus	15	Relaxed	Read deduplication	Single-cell	411573247	179669499	48966677	601487	782	315	191288			0.32895
BPGPC	Relaxed-Norm-SingleCell	SPOT_CSP2799	12SPOviralmetaG_FD	Virus fraction	Accel-NGS 1S Plus	15	Relaxed	Read normalization	Single-cell	353130795	166964610	35151931	485395	904	322	100320			0.353682
BPPGT	Strict-None-Meta	SPOT_CSP2799	43SPOviralmetaG_FD	Virus fraction	Accel-NGS 1S Plus	14	Strict	None	Metagenome	325894215	87500220	469626	597938	575	309	25278			0.51674
BPPGT	Strict-Dedup-Meta	SPOT_CSP2799	43SPOviralmetaG_FD	Virus fraction	Accel-NGS 1S Plus	14	Strict	Read deduplication	Metagenome	336720262	143308764	4631056	501245	798	320	32527			0.442336
BPPGT	Strict-Norm-Meta	SPOT_CSP2799	43SPOviralmetaG_FD	Virus fraction	Accel-NGS 1S Plus	14	Strict	Read normalization	Metagenome	323644347	87391574	383970	592098	578	309	23621			0.522143
BPPGT	Strict-None-SingleCell	SPOT_CSP2799	43SPOviralmetaG_FD	Virus fraction	Accel-NGS 1S Plus	14	Strict	None	Single-cell	351036372	153753145	19740110	507934	816	321	69125			0.393966
BPPGT	Strict-Dedup-SingleCell	SPOT_CSP2799	43SPOviralmetaG_FD	Virus fraction	Accel-NGS 1S Plus	14	Strict	Read deduplication	Single-cell	387591283	173793120	38415431	546391	837	324	301452			0.364963
BPPGT	Strict-Norm-SingleCell	SPOT_CSP2799	43SPOviralmetaG_FD	Virus fraction	Accel-NGS 1S Plus	14	Strict	Read normalization	Single-cell	347553711	153539755	20430945	498642	826	322	69125			0.38554
BPPGT	Relaxed-None-Meta	SPOT_CSP2799	43SPOviralmetaG_FD	Virus fraction	Accel-NGS 1S Plus	14	Relaxed	None	Metagenome	375645459	120542019	1049532	657046	626	310	30440			0.503542
BPPGT	Relaxed-Dedup-Meta	SPOT_CSP2799	43SPOviralmetaG_FD	Virus fraction	Accel-NGS 1S Plus	14	Relaxed	Read deduplication	Metagenome	387989026	173861605	12953567	558006	845	320	51618			0.423397
BPPGT	Relaxed-Norm-Meta	SPOT_CSP2799	43SPOviralmetaG_FD	Virus fraction	Accel-NGS 1S Plus	14	Relaxed	Read normalization	Metagenome	368113623	120115956	941833	637673	636	311	29422			0.500299
BPPGT	Relaxed-None-SingleCell	SPOT_CSP2799	43SPOviralmetaG_FD	Virus fraction	Accel-NGS 1S Plus	14	Relaxed	None	Single-cell	409392732	184423214	28266892	581704	846	322	80259			0.400524
BPPGT	Relaxed-Dedup-SingleCell	SPOT_CSP2799	43SPOviralmetaG_FD	Virus fraction	Accel-NGS 1S Plus	14	Relaxed	Read deduplication	Single-cell	454693758	202969600	46269137	645680	825	322	298714			0.376837
BPPGT	Relaxed-Norm-SingleCell	SPOT_CSP2799	43SPOviralmetaG_FD	Virus fraction	Accel-NGS 1S Plus	14	Relaxed	Read normalization	Single-cell	397909634	183352499	28599856	554625	876	324	82291			0.393275
BPPGX	Strict-None-Meta	SPOT_CSP2799	46SPOviralmetaG_FD	Virus fraction	Accel-NGS 1S Plus	14	Strict	None	Metagenome	487906483	142296751	1040311	867191	594	311	33387			0.548675
BPPGX	Strict-Dedup-Meta	SPOT_CSP2799	46SPOviralmetaG_FD	Virus fraction	Accel-NGS 1S Plus	14	Strict	Read deduplication	Metagenome	483009584	215509150	13105816	698835	840	320	56556			0.444523
BPPGX	Strict-Norm-Meta	SPOT_CSP2799	46SPOviralmetaG_FD	Virus fraction	Accel-NGS 1S Plus	14	Strict	Read normalization	Metagenome	483946025	141846315	765834	857793	597	311	29351			0.547638
BPPGX	Strict-None-SingleCell	SPOT_CSP2799	46SPOviralmetaG_FD	Virus fraction	Accel-NGS 1S Plus	14	Strict	None	Single-cell	529917823	230459643	32653304	769004	807	321	153997			0.423888
BPPGX	Strict-Dedup-SingleCell	SPOT_CSP2799	46SPOviralmetaG_FD	Virus fraction	Accel-NGS 1S Plus	14	Strict	Read deduplication	Single-cell	559049607	251693644	55654520	786172	838	324	281726			0.389072
BPPGX	Strict-Norm-SingleCell	SPOT_CSP2799	46SPOviralmetaG_FD	Virus fraction	Accel-NGS 1S Plus	14	Strict	Read normalization	Single-cell	524350101	229996618	33074650	755615	816	322	126940			0.417264
BPPGX	Relaxed-None-Meta	SPOT_CSP2799	46SPOviralmetaG_FD	Virus fraction	Accel-NGS 1S Plus	14	Relaxed	None	Metagenome	601959792	215879736	4880455	991592	665	313	43090			0.492422
BPPGX	Relaxed-Dedup-Meta	SPOT_CSP2799	46SPOviralmetaG_FD	Virus fraction	Accel-NGS 1S Plus	14	Relaxed	Read deduplication	Metagenome	599553951	271063322	28972868	858620	850	319	60334			0.425907
BPPGX	Relaxed-Norm-Meta	SPOT_CSP2799	46SPOviralmetaG_FD	Virus fraction	Accel-NGS 1S Plus	14	Relaxed	Read normalization	Metagenome	582992164	214448541	4508619	944980	685	315	49034			0.50358
BPPGX	Relaxed-None-SingleCell	SPOT_CSP2799	46SPOviralmetaG_FD	Virus fraction	Accel-NGS 1S Plus	14	Relaxed	None	Single-cell	667200110	293046132	52829964	961537	814	321	134171			0.407535
BPPGX	Relaxed-Dedup-SingleCell	SPOT_CSP2799	46SPOviralmetaG_FD	Virus fraction	Accel-NGS 1S Plus	14	Relaxed	Read deduplication	Single-cell	708168267	310167967	71933659	1019080	801	321	343525			0.392241
BPPGX	Relaxed-Norm-SingleCell	SPOT_CSP2799	46SPOviralmetaG_FD	Virus fraction	Accel-NGS 1S Plus	14	Relaxed	Read normalization	Single-cell	639042998	290646360	53211323	894410	858	324	185989			0.411921
BPPHH	Strict-None-Meta	SPOT_CSP2799	56SPOviralmetaG_FD	Virus fraction	Accel-NGS 1S Plus	14	Strict	None	Metagenome	223504965	58734936	1289528	414049	564	308	43471			0.524391
BPPHH	Strict-Dedup-Meta	SPOT_CSP2799	56SPOviralmetaG_FD	Virus fraction	Accel-NGS 1S Plus	14	Strict	Read deduplication	Metagenome	230556463	105904507	6849181	326078	875	322	51368			0.423882
BPPHH	Strict-Norm-Meta	SPOT_CSP2799	56SPOviralmetaG_FD	Virus fraction	Accel-NGS 1S Plus	14	Strict	Read normalization	Metagenome	222461351	58685142	899957	411308	566	308	26744			0.523727
BPPHH	Strict-None-SingleCell	SPOT_CSP2799	56SPOviralmetaG_FD	Virus fraction	Accel-NGS 1S Plus	14	Strict	None	Single-cell	241116254	105041990	15081489	350186	805	320	64609			0.404793
BPPHH	Strict-Dedup-SingleCell	SPOT_CSP2799	56SPOviralmetaG_FD	Virus fraction	Accel-NGS 1S Plus	14	Strict	Read deduplication	Single-cell	267090685	122583573	30302985	368670	862	326	270786			0.368444
BPPHH	Strict-Norm-SingleCell	SPOT_CSP2799	56SPOviralmetaG_FD	Virus fraction	Accel-NGS 1S Plus	14	Strict	Read normalization	Single-cell	239366295	105033466	15684397	345520	813	321	64609			0.395256
BPPHH	Relaxed-None-Meta	SPOT_CSP2799	56SPOviralmetaG_FD	Virus fraction	Accel-NGS 1S Plus	14	Relaxed	None	Metagenome	253119462	80339562	2222781	444335	616	309	72683			0.498614
BPPHH	Relaxed-Dedup-Meta	SPOT_CSP2799	56SPOviralmetaG_FD	Virus fraction	Accel-NGS 1S Plus	14	Relaxed	Read deduplication	Metagenome	259474529	121113497	11824149	361955	894	322	87071			0.41853
BPPHH	Relaxed-Norm-Meta	SPOT_CSP2799	56SPOviralmetaG_FD	Virus fraction	Accel-NGS 1S Plus	14	Relaxed	Read normalization	Metagenome	248549101	80104364	1793824	432535	626	311	48584			0.493218
BPPHH	Relaxed-None-SingleCell	SPOT_CSP2799	56SPOviralmetaG_FD	Virus fraction	Accel-NGS 1S Plus	14	Relaxed	None	Single-cell	275456409	122863643	21098771	393270	831	321	139728			0.387707
BPPHH	Relaxed-Dedup-SingleCell	SPOT_CSP2799	56SPOviralmetaG_FD	Virus fraction	Accel-NGS 1S Plus	14	Relaxed	Read deduplication	Single-cell	304670150	138528147	35805685	424229	848	324	317861			0.365592
BPPHH	Relaxed-Norm-SingleCell	SPOT_CSP2799	56SPOviralmetaG_FD	Virus fraction	Accel-NGS 1S Plus	14	Relaxed	Read normalization	Single-cell	268659473	122313070	21396497	377152	856	323	83660			0.389287
BPYBH	Strict-None-Meta	SPOT_CSP2799	30SPOviralmetaG_FD	Virus fraction	Accel-NGS 1S Plus	15	Strict	None	Metagenome	254490787	66823311	547349	476461	557	306	40520			0.50669
BPYBH	Strict-Dedup-Meta	SPOT_CSP2799	30SPOviralmetaG_FD	Virus fraction	Accel-NGS 1S Plus	15	Strict	Read deduplication	Metagenome	262296749	101781846	2550731	415521	716	314	42199			0.437634
BPYBH	Strict-Norm-Meta	SPOT_CSP2799	30SPOviralmetaG_FD	Virus fraction	Accel-NGS 1S Plus	15	Strict	Read normalization	Metagenome	252732506	66811679	515485	471319	560	306	36745			0.498446
BPYBH	Strict-None-SingleCell	SPOT_CSP2799	30SPOviralmetaG_FD	Virus fraction	Accel-NGS 1S Plus	15	Strict	None	Single-cell	274184348	111694475	14370531	420310	736	315	121869			0.382983
BPYBH	Strict-Dedup-SingleCell	SPOT_CSP2799	30SPOviralmetaG_FD	Virus fraction	Accel-NGS 1S Plus	15	Strict	Read deduplication	Single-cell	305804995	126549468	27853548	461005	742	316	185862			0.361875
BPYBH	Strict-Norm-SingleCell	SPOT_CSP2799	30SPOviralmetaG_FD	Virus fraction	Accel-NGS 1S Plus	15	Strict	Read normalization	Single-cell	271489624	111694461	14600073	412536	745	316	121868			0.388993
BPYBH	Relaxed-None-Meta	SPOT_CSP2799	30SPOviralmetaG_FD	Virus fraction	Accel-NGS 1S Plus	15	Relaxed	None	Metagenome	285229978	84645616	1047410	520251	583	306	41413			0.503361
BPYBH	Relaxed-Dedup-Meta	SPOT_CSP2799	30SPOviralmetaG_FD	Virus fraction	Accel-NGS 1S Plus	15	Relaxed	Read deduplication	Metagenome	292112526	125313821	12649152	436828	787	315	51401			0.40015
BPYBH	Relaxed-Norm-Meta	SPOT_CSP2799	30SPOviralmetaG_FD	Virus fraction	Accel-NGS 1S Plus	15	Relaxed	Read normalization	Metagenome	279372176	84658245	1002408	503997	594	307	38847			0.491839
BPYBH	Relaxed-None-SingleCell	SPOT_CSP2799	30SPOviralmetaG_FD	Virus fraction	Accel-NGS 1S Plus	15	Relaxed	None	Single-cell	310155179	128166335	18896799	471835	745	315	100276			0.393041
BPYBH	Relaxed-Dedup-SingleCell	SPOT_CSP2799	30SPOviralmetaG_FD	Virus fraction	Accel-NGS 1S Plus	15	Relaxed	Read deduplication	Single-cell	348320007	142062816	32321886	530561	720	315	185862			0.357001
BPYBH	Relaxed-Norm-SingleCell	SPOT_CSP2799	30SPOviralmetaG_FD	Virus fraction	Accel-NGS 1S Plus	15	Relaxed	Read normalization	Single-cell	301483779	127630743	19204548	449994	771	317	121702			0.393753
BPYBT	Strict-None-Meta	SPOT_CSP2799	35SPOviralmetaG_FD	Virus fraction	Accel-NGS 1S Plus	15	Strict	None	Metagenome	233166214	72822410	2934437	413481	627	310	85959			0.493067
BPYBT	Strict-Dedup-Meta	SPOT_CSP2799	35SPOviralmetaG_FD	Virus fraction	Accel-NGS 1S Plus	15	Strict	Read deduplication	Metagenome	237126105	119630637	10073187	311865	1016	329	87722			0.394173
BPYBT	Strict-Norm-Meta	SPOT_CSP2799	35SPOviralmetaG_FD	Virus fraction	Accel-NGS 1S Plus	15	Strict	Read normalization	Metagenome	231807578	72819902	2426140	409051	630	310	81050			0.493992
BPYBT	Strict-None-SingleCell	SPOT_CSP2799	35SPOviralmetaG_FD	Virus fraction	Accel-NGS 1S Plus	15	Strict	None	Single-cell	249673498	124004127	21984514	328716	987	327	76851			0.360282
BPYBT	Strict-Dedup-SingleCell	SPOT_CSP2799	35SPOviralmetaG_FD	Virus fraction	Accel-NGS 1S Plus	15	Strict	Read deduplication	Single-cell	268057450	138187959	42173377	335076	1065	334	296992			0.326097
BPYBT	Strict-Norm-SingleCell	SPOT_CSP2799	35SPOviralmetaG_FD	Virus fraction	Accel-NGS 1S Plus	15	Strict	Read normalization	Single-cell	248075739	124365933	23759736	323092	1005	329	193358			0.356753
BPYBT	Relaxed-None-Meta	SPOT_CSP2799	35SPOviralmetaG_FD	Virus fraction	Accel-NGS 1S Plus	15	Relaxed	None	Metagenome	250553722	86698412	4197904	432899	667	310	76987			0.476674
BPYBT	Relaxed-Dedup-Meta	SPOT_CSP2799	35SPOviralmetaG_FD	Virus fraction	Accel-NGS 1S Plus	15	Relaxed	Read deduplication	Metagenome	251573219	131490108	19133738	319060	1089	330	160416			0.360352
BPYBT	Relaxed-Norm-Meta	SPOT_CSP2799	35SPOviralmetaG_FD	Virus fraction	Accel-NGS 1S Plus	15	Relaxed	Read normalization	Metagenome	247269461	86849600	3709461	422740	676	311	93799			0.482876
BPYBT	Relaxed-None-SingleCell	SPOT_CSP2799	35SPOviralmetaG_FD	Virus fraction	Accel-NGS 1S Plus	15	Relaxed	None	Single-cell	268906132	135656836	26797941	349228	1016	328	137715			0.359116
BPYBT	Relaxed-Dedup-SingleCell	SPOT_CSP2799	35SPOviralmetaG_FD	Virus fraction	Accel-NGS 1S Plus	15	Relaxed	Read deduplication	Single-cell	288014193	147675995	46486040	361342	1053	332	317924			0.321432
BPYBT	Relaxed-Norm-SingleCell	SPOT_CSP2799	35SPOviralmetaG_FD	Virus fraction	Accel-NGS 1S Plus	15	Relaxed	Read normalization	Single-cell	264392786	135692278	28551503	337100	1050	330	164097			0.349932
BPYBW	Strict-None-Meta	SPOT_CSP2799	37SPOviralmetaG_FD	Virus fraction	Accel-NGS 1S Plus	15	Strict	None	Metagenome	274920473	58243716	606307	547120	517	303	33253			0.525318
BPYBW	Strict-Dedup-Meta	SPOT_CSP2799	37SPOviralmetaG_FD	Virus fraction	Accel-NGS 1S Plus	15	Strict	Read deduplication	Metagenome	278461596	98091611	1302489	456146	671	315	35482			0.467069
BPYBW	Strict-Norm-Meta	SPOT_CSP2799	37SPOviralmetaG_FD	Virus fraction	Accel-NGS 1S Plus	15	Strict	Read normalization	Metagenome	273521196	58417276	423810	541504	519	304	34164			0.536901
BPYBW	Strict-None-SingleCell	SPOT_CSP2799	37SPOviralmetaG_FD	Virus fraction	Accel-NGS 1S Plus	15	Strict	None	Single-cell	293140830	110546654	10616193	465550	686	315	65646			0.417629
BPYBW	Strict-Dedup-SingleCell	SPOT_CSP2799	37SPOviralmetaG_FD	Virus fraction	Accel-NGS 1S Plus	15	Strict	Read deduplication	Single-cell	323520362	129599886	24096767	486767	731	321	147328			0.388368
BPYBW	Strict-Norm-SingleCell	SPOT_CSP2799	37SPOviralmetaG_FD	Virus fraction	Accel-NGS 1S Plus	15	Strict	Read normalization	Single-cell	291622177	110779311	11206174	460805	691	315	54748			0.415484
BPYBW	Relaxed-None-Meta	SPOT_CSP2799	37SPOviralmetaG_FD	Virus fraction	Accel-NGS 1S Plus	15	Relaxed	None	Metagenome	291694722	67698480	1043297	573444	531	303	35477			0.523544
BPYBW	Relaxed-Dedup-Meta	SPOT_CSP2799	37SPOviralmetaG_FD	Virus fraction	Accel-NGS 1S Plus	15	Relaxed	Read deduplication	Metagenome	291336095	117836344	8176938	443632	750	318	46421			0.435668
BPYBW	Relaxed-Norm-Meta	SPOT_CSP2799	37SPOviralmetaG_FD	Virus fraction	Accel-NGS 1S Plus	15	Relaxed	Read normalization	Metagenome	288657174	67921070	847756	562832	535	304	33473			0.511877
BPYBW	Relaxed-None-SingleCell	SPOT_CSP2799	37SPOviralmetaG_FD	Virus fraction	Accel-NGS 1S Plus	15	Relaxed	None	Single-cell	312987072	120255367	13280426	491723	698	315	105628			0.419615
BPYBW	Relaxed-Dedup-SingleCell	SPOT_CSP2799	37SPOviralmetaG_FD	Virus fraction	Accel-NGS 1S Plus	15	Relaxed	Read deduplication	Single-cell	345221130	138373161	27392962	520009	728	321	189783			0.378928
BPYBW	Relaxed-Norm-SingleCell	SPOT_CSP2799	37SPOviralmetaG_FD	Virus fraction	Accel-NGS 1S Plus	15	Relaxed	Read normalization	Single-cell	309166111	120288334	13578304	481800	708	316	54815			0.404482
BPYBY	Strict-None-Meta	SPOT_CSP2799	49SPOviralmetaG_FD	Virus fraction	Accel-NGS 1S Plus	15	Strict	None	Metagenome	154440677	15434001	41596	358110	427	294	10750			0.563875
BPYBY	Strict-Dedup-Meta	SPOT_CSP2799	49SPOviralmetaG_FD	Virus fraction	Accel-NGS 1S Plus	15	Strict	Read deduplication	Metagenome	169225341	35788744	21809	331744	510	304	11749			0.518728
BPYBY	Strict-Norm-Meta	SPOT_CSP2799	49SPOviralmetaG_FD	Virus fraction	Accel-NGS 1S Plus	15	Strict	Read normalization	Metagenome	152778465	15516622	21329	350714	428	295	10961			0.561076
BPYBY	Strict-None-SingleCell	SPOT_CSP2799	49SPOviralmetaG_FD	Virus fraction	Accel-NGS 1S Plus	15	Strict	None	Single-cell	163512373	44303038	1240843	304890	534	304	23757			0.452597
BPYBY	Strict-Dedup-SingleCell	SPOT_CSP2799	49SPOviralmetaG_FD	Virus fraction	Accel-NGS 1S Plus	15	Strict	Read deduplication	Single-cell	202737023	62299367	8039569	355162	576	309	112604			0.4145
BPYBY	Strict-Norm-SingleCell	SPOT_CSP2799	49SPOviralmetaG_FD	Virus fraction	Accel-NGS 1S Plus	15	Strict	Read normalization	Single-cell	162469968	44416735	1317995	301832	536	304	34061			0.447339
BPYBY	Relaxed-None-Meta	SPOT_CSP2799	49SPOviralmetaG_FD	Virus fraction	Accel-NGS 1S Plus	15	Relaxed	None	Metagenome	164623892	18194782	88677	380148	432	294	27317			0.548963
BPYBY	Relaxed-Dedup-Meta	SPOT_CSP2799	49SPOviralmetaG_FD	Virus fraction	Accel-NGS 1S Plus	15	Relaxed	Read deduplication	Metagenome	182707228	50815307	531505	333771	557	306	32646			0.482942
BPYBY	Relaxed-Norm-Meta	SPOT_CSP2799	49SPOviralmetaG_FD	Virus fraction	Accel-NGS 1S Plus	15	Relaxed	Read normalization	Metagenome	161764314	18433611	102007	368797	435	295	21982			0.550119
BPYBY	Relaxed-None-SingleCell	SPOT_CSP2799	49SPOviralmetaG_FD	Virus fraction	Accel-NGS 1S Plus	15	Relaxed	None	Single-cell	176904442	49301687	2359742	326729	540	304	63212			0.443836
BPYBY	Relaxed-Dedup-SingleCell	SPOT_CSP2799	49SPOviralmetaG_FD	Virus fraction	Accel-NGS 1S Plus	15	Relaxed	Read deduplication	Single-cell	222167407	68024841	10391270	389862	569	308	189128			0.406211
BPYBY	Relaxed-Norm-SingleCell	SPOT_CSP2799	49SPOviralmetaG_FD	Virus fraction	Accel-NGS 1S Plus	15	Relaxed	Read normalization	Single-cell	174328860	49249921	2145041	320172	545	304	50972			0.445038
BPYCX	Strict-None-Meta	SPOT_CSP2799	28SPOviralmetaG_FD	Virus fraction	Accel-NGS 1S Plus	15	Strict	None	Metagenome	254644653	58396779	530457	495555	538	305	34003			0.531741
BPYCX	Strict-Dedup-Meta	SPOT_CSP2799	28SPOviralmetaG_FD	Virus fraction	Accel-NGS 1S Plus	15	Strict	Read deduplication	Metagenome	262650534	111925597	4048691	390237	796	320	40976			0.426137
BPYCX	Strict-Norm-Meta	SPOT_CSP2799	28SPOviralmetaG_FD	Virus fraction	Accel-NGS 1S Plus	15	Strict	Read normalization	Metagenome	253735592	58596326	434470	491619	540	305	29777			0.531011
BPYCX	Strict-None-SingleCell	SPOT_CSP2799	28SPOviralmetaG_FD	Virus fraction	Accel-NGS 1S Plus	15	Strict	None	Single-cell	273238089	114586451	11809181	408487	769	319	65840			0.400344
BPYCX	Strict-Dedup-SingleCell	SPOT_CSP2799	28SPOviralmetaG_FD	Virus fraction	Accel-NGS 1S Plus	15	Strict	Read deduplication	Single-cell	304098185	134380433	29623127	431311	816	325	200704			0.349016
BPYCX	Strict-Norm-SingleCell	SPOT_CSP2799	28SPOviralmetaG_FD	Virus fraction	Accel-NGS 1S Plus	15	Strict	Read normalization	Single-cell	271780173	114951363	12499215	403743	777	320	65840			0.398245
BPYCX	Relaxed-None-Meta	SPOT_CSP2799	28SPOviralmetaG_FD	Virus fraction	Accel-NGS 1S Plus	15	Relaxed	None	Metagenome	273271670	69069864	1051186	525874	554	304	39002			0.51888
BPYCX	Relaxed-Dedup-Meta	SPOT_CSP2799	28SPOviralmetaG_FD	Virus fraction	Accel-NGS 1S Plus	15	Relaxed	Read deduplication	Metagenome	279428189	122604237	8640963	406825	821	321	37922			0.410286
BPYCX	Relaxed-Norm-Meta	SPOT_CSP2799	28SPOviralmetaG_FD	Virus fraction	Accel-NGS 1S Plus	15	Relaxed	Read normalization	Metagenome	270546092	69250118	936662	516420	559	305	35367			0.511848
BPYCX	Relaxed-None-SingleCell	SPOT_CSP2799	28SPOviralmetaG_FD	Virus fraction	Accel-NGS 1S Plus	15	Relaxed	None	Single-cell	294704834	125997090	15484274	435463	786	319	80034			0.388894
BPYCX	Relaxed-Dedup-SingleCell	SPOT_CSP2799	28SPOviralmetaG_FD	Virus fraction	Accel-NGS 1S Plus	15	Relaxed	Read deduplication	Single-cell	326812672	143628473	33035886	466263	807	323	201847			0.354947
BPYCX	Relaxed-Norm-SingleCell	SPOT_CSP2799	28SPOviralmetaG_FD	Virus fraction	Accel-NGS 1S Plus	15	Relaxed	Read normalization	Single-cell	290724956	126053664	16183882	424939	801	320	80042			0.387804
BPYCY	Strict-None-Meta	SPOT_CSP2799	29SPOviralmetaG_FD	Virus fraction	Accel-NGS 1S Plus	14	Strict	None	Metagenome	338633328	77858817	786924	655854	529	305	26220			0.532666
BPYCY	Strict-Dedup-Meta	SPOT_CSP2799	29SPOviralmetaG_FD	Virus fraction	Accel-NGS 1S Plus	14	Strict	Read deduplication	Metagenome	351158392	137442267	4063348	548880	724	316	39463			0.45172
BPYCY	Strict-Norm-Meta	SPOT_CSP2799	29SPOviralmetaG_FD	Virus fraction	Accel-NGS 1S Plus	14	Strict	Read normalization	Metagenome	336680644	77922011	656162	650226	531	305	30133			0.534824
BPYCY	Strict-None-SingleCell	SPOT_CSP2799	29SPOviralmetaG_FD	Virus fraction	Accel-NGS 1S Plus	14	Strict	None	Single-cell	363699121	144443006	16761733	561891	718	316	65612			0.414791
BPYCY	Strict-Dedup-SingleCell	SPOT_CSP2799	29SPOviralmetaG_FD	Virus fraction	Accel-NGS 1S Plus	14	Strict	Read deduplication	Single-cell	411192837	168451587	36268628	613807	739	320	205718			0.370663
BPYCY	Strict-Norm-SingleCell	SPOT_CSP2799	29SPOviralmetaG_FD	Virus fraction	Accel-NGS 1S Plus	14	Strict	Read normalization	Single-cell	360893739	144430229	17328511	554507	725	317	76953			0.41239
BPYCY	Relaxed-None-Meta	SPOT_CSP2799	29SPOviralmetaG_FD	Virus fraction	Accel-NGS 1S Plus	14	Relaxed	None	Metagenome	380443805	100565696	1554312	717675	555	305	40559			0.5164
BPYCY	Relaxed-Dedup-Meta	SPOT_CSP2799	29SPOviralmetaG_FD	Virus fraction	Accel-NGS 1S Plus	14	Relaxed	Read deduplication	Metagenome	391736135	159303916	10501975	597776	746	317	43666			0.432398
BPYCY	Relaxed-Norm-Meta	SPOT_CSP2799	29SPOviralmetaG_FD	Virus fraction	Accel-NGS 1S Plus	14	Relaxed	Read normalization	Metagenome	375022989	100532024	1257552	702687	560	306	39705			0.509783
BPYCY	Relaxed-None-SingleCell	SPOT_CSP2799	29SPOviralmetaG_FD	Virus fraction	Accel-NGS 1S Plus	14	Relaxed	None	Single-cell	411641824	166666131	22389312	628432	734	316	92330			0.391944
BPYCY	Relaxed-Dedup-SingleCell	SPOT_CSP2799	29SPOviralmetaG_FD	Virus fraction	Accel-NGS 1S Plus	14	Relaxed	Read deduplication	Single-cell	463924035	188433819	41969217	698014	729	319	201882			0.371515
BPYCY	Relaxed-Norm-SingleCell	SPOT_CSP2799	29SPOviralmetaG_FD	Virus fraction	Accel-NGS 1S Plus	14	Relaxed	Read normalization	Single-cell	403406476	166198933	22652878	608524	749	317	86503			0.401076
BWNCN	Strict-None-Meta	Delaware_CSP1621	Viral MetaG DEL_Mar_31	Virus fraction	Nextera XT	9	Strict	None	Metagenome	283781789	145800151	29578511	374831	1048	318	113799	33	0.226337	0.367101
BWNCN	Strict-Dedup-Meta	Delaware_CSP1621	Viral MetaG DEL_Mar_31	Virus fraction	Nextera XT	9	Strict	Read deduplication	Metagenome	277426032	146539786	29927672	354019	1104	326	113799	33	0.225195	0.365223
BWNCN	Strict-Norm-Meta	Delaware_CSP1621	Viral MetaG DEL_Mar_31	Virus fraction	Nextera XT	9	Strict	Read normalization	Metagenome	273792436	144784727	28719500	345541	1104	325	105729	32	0.221018	0.366403
BWNCN	Strict-None-SingleCell	Delaware_CSP1621	Viral MetaG DEL_Mar_31	Virus fraction	Nextera XT	9	Strict	None	Single-cell	305746369	169886824	40503455	381815	1253	323	176349	45	0.264882	0.335193
BWNCN	Strict-Dedup-SingleCell	Delaware_CSP1621	Viral MetaG DEL_Mar_31	Virus fraction	Nextera XT	9	Strict	Read deduplication	Single-cell	300680130	169832163	40941008	366426	1299	332	153037	44	0.259079	0.320502
BWNCN	Strict-Norm-SingleCell	Delaware_CSP1621	Viral MetaG DEL_Mar_31	Virus fraction	Nextera XT	9	Strict	Read normalization	Single-cell	288670416	167501713	40124099	325028	1373	345	176349	44	0.262684	0.328602
BWNCN	Relaxed-None-Meta	Delaware_CSP1621	Viral MetaG DEL_Mar_31	Virus fraction	Nextera XT	9	Relaxed	None	Metagenome	483794638	202018049	38191191	745412	756	308	149643	40	0.198002	0.392785
BWNCN	Relaxed-Dedup-Meta	Delaware_CSP1621	Viral MetaG DEL_Mar_31	Virus fraction	Nextera XT	9	Relaxed	Read deduplication	Metagenome	478690258	203179818	38251034	726609	774	311	149643	40	0.19687	0.395601
BWNCN	Relaxed-Norm-Meta	Delaware_CSP1621	Viral MetaG DEL_Mar_31	Virus fraction	Nextera XT	9	Relaxed	Read normalization	Metagenome	415539156	194607230	37024164	579916	897	318	149643	41	0.210681	0.37344
BWNCN	Relaxed-None-SingleCell	Delaware_CSP1621	Viral MetaG DEL_Mar_31	Virus fraction	Nextera XT	9	Relaxed	None	Single-cell	551989704	245898051	54580841	821738	824	311	212673	60	0.244004	0.369644
BWNCN	Relaxed-Dedup-SingleCell	Delaware_CSP1621	Viral MetaG DEL_Mar_31	Virus fraction	Nextera XT	9	Relaxed	Read deduplication	Single-cell	549048169	245691672	54779427	812093	830	314	212371	55	0.223858	0.368986
BWNCN	Relaxed-Norm-SingleCell	Delaware_CSP1621	Viral MetaG DEL_Mar_31	Virus fraction	Nextera XT	9	Relaxed	Read normalization	Single-cell	447222737	233107454	54535913	559886	1082	333	182092	65	0.278841	0.353948
BWNCO	Strict-None-Meta	Delaware_CSP1621	Viral MetaG DEL_Sep_01	Virus fraction	Nextera XT	15	Strict	None	Metagenome	441365073	206477351	39089305	630431	892	306	385791	64	0.309961	0.3849
BWNCO	Strict-Dedup-Meta	Delaware_CSP1621	Viral MetaG DEL_Sep_01	Virus fraction	Nextera XT	15	Strict	Read deduplication	Metagenome	403527504	208367654	41287589	518040	1059	327	385791	75	0.359941	0.376289
BWNCO	Strict-Norm-Meta	Delaware_CSP1621	Viral MetaG DEL_Sep_01	Virus fraction	Nextera XT	15	Strict	Read normalization	Metagenome	433974869	205902641	37707576	608456	914	309	385791	65	0.315683	0.380064
BWNCO	Strict-None-SingleCell	Delaware_CSP1621	Viral MetaG DEL_Sep_01	Virus fraction	Nextera XT	15	Strict	None	Single-cell	464745776	242381295	50701729	609635	1084	313	432623	113	0.466208	0.361374
BWNCO	Strict-Dedup-SingleCell	Delaware_CSP1621	Viral MetaG DEL_Sep_01	Virus fraction	Nextera XT	15	Strict	Read deduplication	Single-cell	440323085	244569854	55082155	529335	1242	336	386541	113	0.462036	0.345395
BWNCO	Strict-Norm-SingleCell	Delaware_CSP1621	Viral MetaG DEL_Sep_01	Virus fraction	Nextera XT	15	Strict	Read normalization	Single-cell	451288381	240265717	50657192	567203	1131	320	432623	108	0.449502	0.358861
BWNCO	Relaxed-None-Meta	Delaware_CSP1621	Viral MetaG DEL_Sep_01	Virus fraction	Nextera XT	15	Relaxed	None	Metagenome	549868341	254524821	51250227	787003	876	309	390488	98	0.385031	0.377185
BWNCO	Relaxed-Dedup-Meta	Delaware_CSP1621	Viral MetaG DEL_Sep_01	Virus fraction	Nextera XT	15	Relaxed	Read deduplication	Metagenome	513546320	257356471	54070244	676677	1003	324	390488	103	0.400223	0.378546
BWNCO	Relaxed-Norm-Meta	Delaware_CSP1621	Viral MetaG DEL_Sep_01	Virus fraction	Nextera XT	15	Relaxed	Read normalization	Metagenome	528260251	252711067	49683933	730512	925	312	517006	93	0.368009	0.377075
BWNCO	Relaxed-None-SingleCell	Delaware_CSP1621	Viral MetaG DEL_Sep_01	Virus fraction	Nextera XT	15	Relaxed	None	Single-cell	589879702	305024160	66675898	776329	1068	316	452207	168	0.550776	0.364199
BWNCO	Relaxed-Dedup-SingleCell	Delaware_CSP1621	Viral MetaG DEL_Sep_01	Virus fraction	Nextera XT	15	Relaxed	Read deduplication	Single-cell	572139881	308295924	73820401	711078	1162	331	452207	199	0.645484	0.363811
BWNCO	Relaxed-Norm-SingleCell	Delaware_CSP1621	Viral MetaG DEL_Sep_01	Virus fraction	Nextera XT	15	Relaxed	Read normalization	Single-cell	554319869	299225801	66381250	681969	1165	325	386565	152	0.507978	0.356727
BWNCP	Strict-None-Meta	Delaware_CSP1621	Viral MetaG DEL_Nov_24	Virus fraction	Nextera XT	18	Strict	None	Metagenome	209538054	68104963	7578130	373871	587	292	58650	36	0.528596	0.430739
BWNCP	Strict-Dedup-Meta	Delaware_CSP1621	Viral MetaG DEL_Nov_24	Virus fraction	Nextera XT	18	Strict	Read deduplication	Metagenome	192999624	68971680	8572045	320263	646	304	111373	32	0.463959	0.409826
BWNCP	Strict-Norm-Meta	Delaware_CSP1621	Viral MetaG DEL_Nov_24	Virus fraction	Nextera XT	18	Strict	Read normalization	Metagenome	209082154	68846715	7160504	369917	594	293	69072	34	0.493851	0.431044
BWNCP	Strict-None-SingleCell	Delaware_CSP1621	Viral MetaG DEL_Nov_24	Virus fraction	Nextera XT	18	Strict	None	Single-cell	211280480	83953388	11308812	335775	716	298	80081	32	0.381164	0.403102
BWNCP	Strict-Dedup-SingleCell	Delaware_CSP1621	Viral MetaG DEL_Nov_24	Virus fraction	Nextera XT	18	Strict	Read deduplication	Single-cell	211836728	91090364	14086349	316168	792	308	79787	50	0.548905	0.385201
BWNCP	Strict-Norm-SingleCell	Delaware_CSP1621	Viral MetaG DEL_Nov_24	Virus fraction	Nextera XT	18	Strict	Read normalization	Single-cell	209930097	84064073	11218958	330970	723	299	80081	30	0.356871	0.404979
BWNCP	Relaxed-None-Meta	Delaware_CSP1621	Viral MetaG DEL_Nov_24	Virus fraction	Nextera XT	18	Relaxed	None	Metagenome	227927821	75685974	8489409	403560	594	294	112945	40	0.5285	0.427752
BWNCP	Relaxed-Dedup-Meta	Delaware_CSP1621	Viral MetaG DEL_Nov_24	Virus fraction	Nextera XT	18	Relaxed	Read deduplication	Metagenome	207893366	75382190	9720218	340154	654	309	112147	41	0.543895	0.417357
BWNCP	Relaxed-Norm-Meta	Delaware_CSP1621	Viral MetaG DEL_Nov_24	Virus fraction	Nextera XT	18	Relaxed	Read normalization	Metagenome	225842568	76310267	8399276	395153	605	295	112795	39	0.511071	0.429103
BWNCP	Relaxed-None-SingleCell	Delaware_CSP1621	Viral MetaG DEL_Nov_24	Virus fraction	Nextera XT	18	Relaxed	None	Single-cell	231728406	94098355	13450866	363208	733	301	80532	49	0.520732	0.388053
BWNCP	Relaxed-Dedup-SingleCell	Delaware_CSP1621	Viral MetaG DEL_Nov_24	Virus fraction	Nextera XT	18	Relaxed	Read deduplication	Single-cell	231308475	100538803	16588007	338423	804	316	79787	48	0.477428	0.378479
BWNCP	Relaxed-Norm-SingleCell	Delaware_CSP1621	Viral MetaG DEL_Nov_24	Virus fraction	Nextera XT	18	Relaxed	Read normalization	Single-cell	229946544	94696287	13021369	356891	746	301	112129	44	0.464643	0.39195
BWNCS	Strict-None-Meta	Delaware_CSP1621	Viral MetaG CB_1504_1	Virus fraction	Nextera XT	11	Strict	None	Metagenome	560597586	245424527	37812944	836244	816	305	212917	37	0.150759	0.408442
BWNCS	Strict-Dedup-Meta	Delaware_CSP1621	Viral MetaG CB_1504_1	Virus fraction	Nextera XT	11	Strict	Read deduplication	Metagenome	531777955	248869654	39159589	740408	901	321	212917	37	0.148672	0.407584
BWNCS	Strict-Norm-Meta	Delaware_CSP1621	Viral MetaG CB_1504_1	Virus fraction	Nextera XT	11	Strict	Read normalization	Metagenome	539682276	242900412	37108903	784108	849	307	305789	39	0.16056	0.408219
BWNCS	Strict-None-SingleCell	Delaware_CSP1621	Viral MetaG CB_1504_1	Virus fraction	Nextera XT	11	Strict	None	Single-cell	602511769	303369875	57612557	812943	1012	313	160771	52	0.171408	0.381253
BWNCS	Strict-Dedup-SingleCell	Delaware_CSP1621	Viral MetaG CB_1504_1	Virus fraction	Nextera XT	11	Strict	Read deduplication	Single-cell	581729594	303756128	60054770	745041	1083	330	161049	48	0.158022	0.373001
BWNCS	Strict-Norm-SingleCell	Delaware_CSP1621	Viral MetaG CB_1504_1	Virus fraction	Nextera XT	11	Strict	Read normalization	Single-cell	570738590	297583809	57921640	728752	1081	320	161050	46	0.154578	0.369524
BWNCS	Relaxed-None-Meta	Delaware_CSP1621	Viral MetaG CB_1504_1	Virus fraction	Nextera XT	11	Relaxed	None	Metagenome	917299459	348259375	50010756	1488559	686	304	159988	41	0.117728	0.425104
BWNCS	Relaxed-Dedup-Meta	Delaware_CSP1621	Viral MetaG CB_1504_1	Virus fraction	Nextera XT	11	Relaxed	Read deduplication	Metagenome	894606566	354522833	50998770	1403225	724	310	161869	36	0.101545	0.423444
BWNCS	Relaxed-Norm-Meta	Delaware_CSP1621	Viral MetaG CB_1504_1	Virus fraction	Nextera XT	11	Relaxed	Read normalization	Metagenome	799157904	336656901	48827918	1206195	780	309	329525	40	0.118815	0.415578
BWNCS	Relaxed-None-SingleCell	Delaware_CSP1621	Viral MetaG CB_1504_1	Virus fraction	Nextera XT	11	Relaxed	None	Single-cell	1058067897	449498656	76804208	1605654	776	310	158947	50	0.111235	0.399752
BWNCS	Relaxed-Dedup-SingleCell	Delaware_CSP1621	Viral MetaG CB_1504_1	Virus fraction	Nextera XT	11	Relaxed	Read deduplication	Single-cell	1048393517	450780107	80102585	1562452	790	316	160860	44	0.0976086	0.389383
BWNCS	Relaxed-Norm-SingleCell	Delaware_CSP1621	Viral MetaG CB_1504_1	Virus fraction	Nextera XT	11	Relaxed	Read normalization	Single-cell	867492722	427630517	77048097	1153201	976	322	158947	48	0.112246	0.386478
BWNCT	Strict-None-Meta	Delaware_CSP1621	Viral MetaG CB_1504_2	Virus fraction	Nextera XT	16	Strict	None	Metagenome	99633174	29658606	3604444	187103	542	289	57051	8	0.269736	0.426831
BWNCT	Strict-Dedup-Meta	Delaware_CSP1621	Viral MetaG CB_1504_2	Virus fraction	Nextera XT	16	Strict	Read deduplication	Metagenome	93411159	29645377	3989388	166091	574	297	57051	8	0.269857	0.419091
BWNCT	Strict-Norm-Meta	Delaware_CSP1621	Viral MetaG CB_1504_2	Virus fraction	Nextera XT	16	Strict	Read normalization	Metagenome	99583693	30167513	3188831	184695	551	290	53799	7	0.232038	0.42992
BWNCT	Strict-None-SingleCell	Delaware_CSP1621	Viral MetaG CB_1504_2	Virus fraction	Nextera XT	16	Strict	None	Single-cell	99816712	36293643	4807717	169620	643	291	65536	10	0.27553	0.404309
BWNCT	Strict-Dedup-SingleCell	Delaware_CSP1621	Viral MetaG CB_1504_2	Virus fraction	Nextera XT	16	Strict	Read deduplication	Single-cell	101597614	39790947	5862115	163982	701	298	65536	12	0.301576	0.390205
BWNCT	Strict-Norm-SingleCell	Delaware_CSP1621	Viral MetaG CB_1504_2	Virus fraction	Nextera XT	16	Strict	Read normalization	Single-cell	98984801	36541288	4742912	164832	657	294	64602	10	0.273663	0.404443
BWNCT	Relaxed-None-Meta	Delaware_CSP1621	Viral MetaG CB_1504_2	Virus fraction	Nextera XT	16	Relaxed	None	Metagenome	104242951	30526496	3635133	196984	536	289	65543	8	0.262067	0.425819
BWNCT	Relaxed-Dedup-Meta	Delaware_CSP1621	Viral MetaG CB_1504_2	Virus fraction	Nextera XT	16	Relaxed	Read deduplication	Metagenome	94328425	29142563	3730053	167534	568	303	57051	11	0.377455	0.430037
BWNCT	Relaxed-Norm-Meta	Delaware_CSP1621	Viral MetaG CB_1504_2	Virus fraction	Nextera XT	16	Relaxed	Read normalization	Metagenome	103709618	30933218	3369967	193224	546	290	65543	5	0.161639	0.431056
BWNCT	Relaxed-None-SingleCell	Delaware_CSP1621	Viral MetaG CB_1504_2	Virus fraction	Nextera XT	16	Relaxed	None	Single-cell	102817365	36846124	5007803	175862	635	292	103218	14	0.379959	0.404499
BWNCT	Relaxed-Dedup-SingleCell	Delaware_CSP1621	Viral MetaG CB_1504_2	Virus fraction	Nextera XT	16	Relaxed	Read deduplication	Single-cell	105501246	40742203	6346919	169597	691	306	118904	15	0.368169	0.395428
BWNCT	Relaxed-Norm-SingleCell	Delaware_CSP1621	Viral MetaG CB_1504_2	Virus fraction	Nextera XT	16	Relaxed	Read normalization	Single-cell	104665907	38292957	5066528	175309	653	294	73008	10	0.261145	0.415782
BWNCU	Strict-None-Meta	Delaware_CSP1621	Viral MetaG CB_1508_1S	Virus fraction	Nextera XT	14	Strict	None	Metagenome	405306708	157382502	21893564	655463	691	298	128140	36	0.228742	0.4158
BWNCU	Strict-Dedup-Meta	Delaware_CSP1621	Viral MetaG CB_1508_1S	Virus fraction	Nextera XT	14	Strict	Read deduplication	Metagenome	366298184	161804494	25407919	531062	826	316	128140	34	0.21013	0.402367
BWNCU	Strict-Norm-Meta	Delaware_CSP1621	Viral MetaG CB_1508_1S	Virus fraction	Nextera XT	14	Strict	Read normalization	Metagenome	400271046	157167850	21026479	641134	702	299	128140	36	0.229054	0.419065
BWNCU	Strict-None-SingleCell	Delaware_CSP1621	Viral MetaG CB_1508_1S	Virus fraction	Nextera XT	14	Strict	None	Single-cell	418972200	192723581	33274901	607485	867	304	160975	53	0.275005	0.394354
BWNCU	Strict-Dedup-SingleCell	Delaware_CSP1621	Viral MetaG CB_1508_1S	Virus fraction	Nextera XT	14	Strict	Read deduplication	Single-cell	403833621	202943650	41382894	530503	1009	325	161957	62	0.305504	0.379767
BWNCU	Strict-Norm-SingleCell	Delaware_CSP1621	Viral MetaG CB_1508_1S	Virus fraction	Nextera XT	14	Strict	Read normalization	Single-cell	410615833	191232371	33355518	582851	884	307	160975	57	0.298067	0.388386
BWNCU	Relaxed-None-Meta	Delaware_CSP1621	Viral MetaG CB_1508_1S	Virus fraction	Nextera XT	14	Relaxed	None	Metagenome	465850313	184301684	27032197	742984	709	301	161485	42	0.227887	0.405189
BWNCU	Relaxed-Dedup-Meta	Delaware_CSP1621	Viral MetaG CB_1508_1S	Virus fraction	Nextera XT	14	Relaxed	Read deduplication	Metagenome	425387213	188085024	31035873	615075	827	318	161113	40	0.21267	0.406477
BWNCU	Relaxed-Norm-Meta	Delaware_CSP1621	Viral MetaG CB_1508_1S	Virus fraction	Nextera XT	14	Relaxed	Read normalization	Metagenome	455277834	183702700	25892268	714943	727	302	161485	37	0.201412	0.419845
BWNCU	Relaxed-None-SingleCell	Delaware_CSP1621	Viral MetaG CB_1508_1S	Virus fraction	Nextera XT	14	Relaxed	None	Single-cell	486200966	227394612	39942261	694553	891	308	161586	66	0.290244	0.397674
BWNCU	Relaxed-Dedup-SingleCell	Delaware_CSP1621	Viral MetaG CB_1508_1S	Virus fraction	Nextera XT	14	Relaxed	Read deduplication	Single-cell	475854790	238327342	49678034	625478	1002	326	159770	70	0.293714	0.386241
BWNCU	Relaxed-Norm-SingleCell	Delaware_CSP1621	Viral MetaG CB_1508_1S	Virus fraction	Nextera XT	14	Relaxed	Read normalization	Single-cell	469051312	224541036	39986156	648667	926	311	161586	62	0.276119	0.403161
BWWYG	Strict-None-Meta	Delaware_CSP1621	Viral MetaG DEL_Mar_31	Virus fraction	Accel-NGS 1S Plus	15	Strict	None	Metagenome	139530262	32463063	839623	282569	538	299	49426	11	0.338847	0.529602
BWWYG	Strict-Dedup-Meta	Delaware_CSP1621	Viral MetaG DEL_Mar_31	Virus fraction	Accel-NGS 1S Plus	15	Strict	Read deduplication	Metagenome	146090415	65637752	2558792	210435	852	322	49427	23	0.350408	0.439268
BWWYG	Strict-Norm-Meta	Delaware_CSP1621	Viral MetaG DEL_Mar_31	Virus fraction	Accel-NGS 1S Plus	15	Strict	Read normalization	Metagenome	136839017	32722535	514242	270070	546	302	40023	10	0.3056	0.537904
BWWYG	Strict-None-SingleCell	Delaware_CSP1621	Viral MetaG DEL_Mar_31	Virus fraction	Accel-NGS 1S Plus	15	Strict	None	Single-cell	149882479	67857807	6696354	213552	856	321	61307	22	0.324207	0.402456
BWWYG	Strict-Dedup-SingleCell	Delaware_CSP1621	Viral MetaG DEL_Mar_31	Virus fraction	Accel-NGS 1S Plus	15	Strict	Read deduplication	Single-cell	162796878	81893679	21179715	209554	1011	330	118667	42	0.51286	0.342805
BWWYG	Strict-Norm-SingleCell	Delaware_CSP1621	Viral MetaG DEL_Mar_31	Virus fraction	Accel-NGS 1S Plus	15	Strict	Read normalization	Single-cell	148461222	69170476	8287308	206144	891	324	73619	19	0.274684	0.394322
BWWYG	Relaxed-None-Meta	Delaware_CSP1621	Viral MetaG DEL_Mar_31	Virus fraction	Accel-NGS 1S Plus	15	Relaxed	None	Metagenome	147975780	37932203	1674659	295196	556	298	58949	10	0.263628	0.519209
BWWYG	Relaxed-Dedup-Meta	Delaware_CSP1621	Viral MetaG DEL_Mar_31	Virus fraction	Accel-NGS 1S Plus	15	Relaxed	Read deduplication	Metagenome	152376357	72016649	5813112	210928	912	324	71737	28	0.388799	0.407687
BWWYG	Relaxed-Norm-Meta	Delaware_CSP1621	Viral MetaG DEL_Mar_31	Virus fraction	Accel-NGS 1S Plus	15	Relaxed	Read normalization	Metagenome	144340210	38414744	1262093	279091	569	302	49439	9	0.234285	0.518095
BWWYG	Relaxed-None-SingleCell	Delaware_CSP1621	Viral MetaG DEL_Mar_31	Virus fraction	Accel-NGS 1S Plus	15	Relaxed	None	Single-cell	159242613	73830811	8856187	222965	883	322	103981	21	0.284434	0.399183
BWWYG	Relaxed-Dedup-SingleCell	Delaware_CSP1621	Viral MetaG DEL_Mar_31	Virus fraction	Accel-NGS 1S Plus	15	Relaxed	Read deduplication	Single-cell	171474192	86254512	23434740	219959	1011	330	108009	42	0.486931	0.339857
BWWYG	Relaxed-Norm-SingleCell	Delaware_CSP1621	Viral MetaG DEL_Mar_31	Virus fraction	Accel-NGS 1S Plus	15	Relaxed	Read normalization	Single-cell	156445410	74727721	10352400	212981	925	325	131539	25	0.334548	0.379709
BWWYH	Strict-None-Meta	Delaware_CSP1621	Viral MetaG DEL_Sep_01	Virus fraction	Accel-NGS 1S Plus	15	Strict	None	Metagenome	188965961	45104839	254849	371197	556	303	27063	9	0.199535	0.597475
BWWYH	Strict-Dedup-Meta	Delaware_CSP1621	Viral MetaG DEL_Sep_01	Virus fraction	Accel-NGS 1S Plus	15	Strict	Read deduplication	Metagenome	203090474	96299945	2789645	279505	923	330	42541	40	0.415369	0.46677
BWWYH	Strict-Norm-Meta	Delaware_CSP1621	Viral MetaG DEL_Sep_01	Virus fraction	Accel-NGS 1S Plus	15	Strict	Read normalization	Metagenome	187476039	45230417	139538	363647	560	305	33713	10	0.22109	0.601144
BWWYH	Strict-None-SingleCell	Delaware_CSP1621	Viral MetaG DEL_Sep_01	Virus fraction	Accel-NGS 1S Plus	15	Strict	None	Single-cell	204075472	98190650	11251574	275294	937	329	50351	31	0.315712	0.420252
BWWYH	Strict-Dedup-SingleCell	Delaware_CSP1621	Viral MetaG DEL_Sep_01	Virus fraction	Accel-NGS 1S Plus	15	Strict	Read deduplication	Single-cell	223122771	118565679	30104397	271132	1126	340	225247	70	0.59039	0.361823
BWWYH	Strict-Norm-SingleCell	Delaware_CSP1621	Viral MetaG DEL_Sep_01	Virus fraction	Accel-NGS 1S Plus	15	Strict	Read normalization	Single-cell	203381851	98770144	12290596	272067	952	330	57210	30	0.303736	0.412733
BWWYH	Relaxed-None-Meta	Delaware_CSP1621	Viral MetaG DEL_Sep_01	Virus fraction	Accel-NGS 1S Plus	15	Relaxed	None	Metagenome	201640233	52406478	394614	394827	576	302	42539	17	0.324387	0.591256
BWWYH	Relaxed-Dedup-Meta	Delaware_CSP1621	Viral MetaG DEL_Sep_01	Virus fraction	Accel-NGS 1S Plus	15	Relaxed	Read deduplication	Metagenome	213478916	107685858	9466915	278605	1015	332	46101	50	0.464314	0.43153
BWWYH	Relaxed-Norm-Meta	Delaware_CSP1621	Viral MetaG DEL_Sep_01	Virus fraction	Accel-NGS 1S Plus	15	Relaxed	Read normalization	Metagenome	199004563	52712172	322055	383202	582	304	42542	15	0.284564	0.587975
BWWYH	Relaxed-None-SingleCell	Delaware_CSP1621	Viral MetaG DEL_Sep_01	Virus fraction	Accel-NGS 1S Plus	15	Relaxed	None	Single-cell	217877932	107958574	15230852	286779	984	330	67035	40	0.370512	0.414102
BWWYH	Relaxed-Dedup-SingleCell	Delaware_CSP1621	Viral MetaG DEL_Sep_01	Virus fraction	Accel-NGS 1S Plus	15	Relaxed	Read deduplication	Single-cell	236514205	126790052	33982890	284305	1152	340	388084	66	0.520546	0.352097
BWWYH	Relaxed-Norm-SingleCell	Delaware_CSP1621	Viral MetaG DEL_Sep_01	Virus fraction	Accel-NGS 1S Plus	15	Relaxed	Read normalization	Single-cell	215785677	108286362	16125234	280575	1006	332	71124	43	0.397095	0.403059
BWWYN	Strict-None-Meta	Delaware_CSP1621	Viral MetaG DEL_Nov_24	Virus fraction	Accel-NGS 1S Plus	15	Strict	None	Metagenome	182701181	38258562	301660	371339	522	301	57580	14	0.365931	0.54014
BWWYN	Strict-Dedup-Meta	Delaware_CSP1621	Viral MetaG DEL_Nov_24	Virus fraction	Accel-NGS 1S Plus	15	Strict	Read deduplication	Metagenome	194211684	83962854	1827209	285627	817	323	57580	39	0.464491	0.449203
BWWYN	Strict-Norm-Meta	Delaware_CSP1621	Viral MetaG DEL_Nov_24	Virus fraction	Accel-NGS 1S Plus	15	Strict	Read normalization	Metagenome	181301175	38482302	246356	363237	525	302	36631	13	0.337818	0.547829
BWWYN	Strict-None-SingleCell	Delaware_CSP1621	Viral MetaG DEL_Nov_24	Virus fraction	Accel-NGS 1S Plus	15	Strict	None	Single-cell	197357976	84054830	6001150	291703	793	321	57665	27	0.321219	0.420827
BWWYN	Strict-Dedup-SingleCell	Delaware_CSP1621	Viral MetaG DEL_Nov_24	Virus fraction	Accel-NGS 1S Plus	15	Strict	Read deduplication	Single-cell	219873220	105560671	21019157	293372	930	331	87686	49	0.464188	0.366773
BWWYN	Strict-Norm-SingleCell	Delaware_CSP1621	Viral MetaG DEL_Nov_24	Virus fraction	Accel-NGS 1S Plus	15	Strict	Read normalization	Single-cell	196760657	84668752	6810334	288315	803	322	56992	31	0.366133	0.413932
BWWYN	Relaxed-None-Meta	Delaware_CSP1621	Viral MetaG DEL_Nov_24	Virus fraction	Accel-NGS 1S Plus	15	Relaxed	None	Metagenome	193323626	44445764	773277	388874	537	300	55134	16	0.359989	0.533363
BWWYN	Relaxed-Dedup-Meta	Delaware_CSP1621	Viral MetaG DEL_Nov_24	Virus fraction	Accel-NGS 1S Plus	15	Relaxed	Read deduplication	Metagenome	202908804	91498615	4669589	289365	856	324	57575	48	0.524598	0.440951
BWWYN	Relaxed-Norm-Meta	Delaware_CSP1621	Viral MetaG DEL_Nov_24	Virus fraction	Accel-NGS 1S Plus	15	Relaxed	Read normalization	Metagenome	190760852	44807059	592612	376540	543	303	38776	18	0.401722	0.529412
BWWYN	Relaxed-None-SingleCell	Delaware_CSP1621	Viral MetaG DEL_Nov_24	Virus fraction	Accel-NGS 1S Plus	15	Relaxed	None	Single-cell	209371173	91408436	8774935	304008	817	322	57575	36	0.393837	0.416239
BWWYN	Relaxed-Dedup-SingleCell	Delaware_CSP1621	Viral MetaG DEL_Nov_24	Virus fraction	Accel-NGS 1S Plus	15	Relaxed	Read deduplication	Single-cell	231440656	111117526	23272164	308707	929	330	112585	56	0.503971	0.358002
BWWYN	Relaxed-Norm-SingleCell	Delaware_CSP1621	Viral MetaG DEL_Nov_24	Virus fraction	Accel-NGS 1S Plus	15	Relaxed	Read normalization	Single-cell	207355876	91974037	9066008	297580	836	323	48910	32	0.347924	0.409601
BWWYO	Strict-None-Meta	Delaware_CSP1621	Viral MetaG CB_1504_1	Virus fraction	Accel-NGS 1S Plus	15	Strict	None	Metagenome	140559211	22716088	88803	302352	473	298	29410	2	0.0880433	0.588045
BWWYO	Strict-Dedup-Meta	Delaware_CSP1621	Viral MetaG CB_1504_1	Virus fraction	Accel-NGS 1S Plus	15	Strict	Read deduplication	Metagenome	156144212	56184671	840991	255754	675	313	36350	21	0.373767	0.488076
BWWYO	Strict-Norm-Meta	Delaware_CSP1621	Viral MetaG CB_1504_1	Virus fraction	Accel-NGS 1S Plus	15	Strict	Read normalization	Metagenome	139273073	22861486	107139	296289	475	299	20791	2	0.0874834	0.57927
BWWYO	Strict-None-SingleCell	Delaware_CSP1621	Viral MetaG CB_1504_1	Virus fraction	Accel-NGS 1S Plus	15	Strict	None	Single-cell	149869756	52582061	3571379	248551	644	311	58589	20	0.380358	0.461853
BWWYO	Strict-Dedup-SingleCell	Delaware_CSP1621	Viral MetaG CB_1504_1	Virus fraction	Accel-NGS 1S Plus	15	Strict	Read deduplication	Single-cell	178017911	71619650	11973999	271267	725	318	145934	25	0.349066	0.400171
BWWYO	Strict-Norm-SingleCell	Delaware_CSP1621	Viral MetaG CB_1504_1	Virus fraction	Accel-NGS 1S Plus	15	Strict	Read normalization	Single-cell	149286279	52744501	3906875	246491	648	312	58588	21	0.398146	0.46645
BWWYO	Relaxed-None-Meta	Delaware_CSP1621	Viral MetaG CB_1504_1	Virus fraction	Accel-NGS 1S Plus	15	Relaxed	None	Metagenome	149877050	26451807	345853	320450	481	297	39773	6	0.226828	0.57582
BWWYO	Relaxed-Dedup-Meta	Delaware_CSP1621	Viral MetaG CB_1504_1	Virus fraction	Accel-NGS 1S Plus	15	Relaxed	Read deduplication	Metagenome	164523451	61608133	2515631	263611	692	314	44008	29	0.470717	0.471322
BWWYO	Relaxed-Norm-Meta	Delaware_CSP1621	Viral MetaG CB_1504_1	Virus fraction	Accel-NGS 1S Plus	15	Relaxed	Read normalization	Metagenome	147397902	26708442	266254	310340	485	299	30244	4	0.149765	0.563364
BWWYO	Relaxed-None-SingleCell	Delaware_CSP1621	Viral MetaG CB_1504_1	Virus fraction	Accel-NGS 1S Plus	15	Relaxed	None	Single-cell	160510309	57716598	5206323	262624	656	312	58751	20	0.346521	0.45291
BWWYO	Relaxed-Dedup-SingleCell	Delaware_CSP1621	Viral MetaG CB_1504_1	Virus fraction	Accel-NGS 1S Plus	15	Relaxed	Read deduplication	Single-cell	189498724	75983561	13342338	289227	720	317	106349	31	0.407983	0.400149
BWWYO	Relaxed-Norm-SingleCell	Delaware_CSP1621	Viral MetaG CB_1504_1	Virus fraction	Accel-NGS 1S Plus	15	Relaxed	Read normalization	Single-cell	158693550	57848182	5147726	257488	665	313	58664	21	0.363019	0.448276
BWWYP	Strict-None-Meta	Delaware_CSP1621	Viral MetaG CB_1504_2	Virus fraction	Accel-NGS 1S Plus	15	Strict	None	Metagenome	124436829	23604007	500447	262441	501	298	40831	7	0.29656	0.543511
BWWYP	Strict-Dedup-Meta	Delaware_CSP1621	Viral MetaG CB_1504_2	Virus fraction	Accel-NGS 1S Plus	15	Strict	Read deduplication	Metagenome	130744818	52725477	1267062	200458	759	319	47005	26	0.49312	0.451972
BWWYP	Strict-Norm-Meta	Delaware_CSP1621	Viral MetaG CB_1504_2	Virus fraction	Accel-NGS 1S Plus	15	Strict	Read normalization	Metagenome	122420394	23769073	250718	252731	506	300	39613	7	0.2945	0.552206
BWWYP	Strict-None-SingleCell	Delaware_CSP1621	Viral MetaG CB_1504_2	Virus fraction	Accel-NGS 1S Plus	15	Strict	None	Single-cell	134040139	53263044	3960277	207473	729	316	42708	25	0.469369	0.413197
BWWYP	Strict-Dedup-SingleCell	Delaware_CSP1621	Viral MetaG CB_1504_2	Virus fraction	Accel-NGS 1S Plus	15	Strict	Read deduplication	Single-cell	149280004	68086086	12917702	207464	859	327	120187	32	0.469993	0.356216
BWWYP	Strict-Norm-SingleCell	Delaware_CSP1621	Viral MetaG CB_1504_2	Virus fraction	Accel-NGS 1S Plus	15	Strict	Read normalization	Single-cell	133157139	54098509	4529634	202795	748	318	51506	24	0.443635	0.415866
BWWYP	Relaxed-None-Meta	Delaware_CSP1621	Viral MetaG CB_1504_2	Virus fraction	Accel-NGS 1S Plus	15	Relaxed	None	Metagenome	130076018	27276877	833785	271480	513	297	48133	11	0.403272	0.536577
BWWYP	Relaxed-Dedup-Meta	Delaware_CSP1621	Viral MetaG CB_1504_2	Virus fraction	Accel-NGS 1S Plus	15	Relaxed	Read deduplication	Metagenome	134647351	56526991	2637916	201607	782	319	49094	19	0.336123	0.428342
BWWYP	Relaxed-Norm-Meta	Delaware_CSP1621	Viral MetaG CB_1504_2	Virus fraction	Accel-NGS 1S Plus	15	Relaxed	Read normalization	Metagenome	127393034	27516626	585778	258812	521	300	47612	6	0.21805	0.540609
BWWYP	Relaxed-None-SingleCell	Delaware_CSP1621	Viral MetaG CB_1504_2	Virus fraction	Accel-NGS 1S Plus	15	Relaxed	None	Single-cell	140670889	56829224	5173590	215335	742	317	48039	25	0.439915	0.408391
BWWYP	Relaxed-Dedup-SingleCell	Delaware_CSP1621	Viral MetaG CB_1504_2	Virus fraction	Accel-NGS 1S Plus	15	Relaxed	Read deduplication	Single-cell	154821382	70290746	13946045	215691	851	326	135480	27	0.384119	0.355115
BWWYP	Relaxed-Norm-SingleCell	Delaware_CSP1621	Viral MetaG CB_1504_2	Virus fraction	Accel-NGS 1S Plus	15	Relaxed	Read normalization	Single-cell	139178190	59341077	7183457	205277	787	320	49053	25	0.421293	0.395494
BWWYS	Strict-None-Meta	Delaware_CSP1621	Viral MetaG CB_1508_1S	Virus fraction	Accel-NGS 1S Plus	17	Strict	None	Metagenome	169107208	33471067	144622	347324	516	300	19652	5	0.149383	0.577933
BWWYS	Strict-Dedup-Meta	Delaware_CSP1621	Viral MetaG CB_1508_1S	Virus fraction	Accel-NGS 1S Plus	17	Strict	Read deduplication	Metagenome	181330586	78506855	1665130	266424	818	323	25423	35	0.445821	0.472039
BWWYS	Strict-Norm-Meta	Delaware_CSP1621	Viral MetaG CB_1508_1S	Virus fraction	Accel-NGS 1S Plus	17	Strict	Read normalization	Metagenome	167769637	33587282	118731	340153	519	302	19215	5	0.148866	0.579847
BWWYS	Strict-None-SingleCell	Delaware_CSP1621	Viral MetaG CB_1508_1S	Virus fraction	Accel-NGS 1S Plus	17	Strict	None	Single-cell	181554297	75720352	5348094	271295	777	320	43626	27	0.356575	0.445788
BWWYS	Strict-Dedup-SingleCell	Delaware_CSP1621	Viral MetaG CB_1508_1S	Virus fraction	Accel-NGS 1S Plus	17	Strict	Read deduplication	Single-cell	202785168	97498222	18620889	270728	931	330	107360	48	0.492317	0.390066
BWWYS	Strict-Norm-SingleCell	Delaware_CSP1621	Viral MetaG CB_1508_1S	Virus fraction	Accel-NGS 1S Plus	17	Strict	Read normalization	Single-cell	181189158	76204655	5821096	269145	784	321	43599	30	0.393677	0.449164
BWWYS	Relaxed-None-Meta	Delaware_CSP1621	Viral MetaG CB_1508_1S	Virus fraction	Accel-NGS 1S Plus	17	Relaxed	None	Metagenome	178285888	38820520	397694	362651	530	300	32448	5	0.128798	0.567769
BWWYS	Relaxed-Dedup-Meta	Delaware_CSP1621	Viral MetaG CB_1508_1S	Virus fraction	Accel-NGS 1S Plus	17	Relaxed	Read deduplication	Metagenome	189174983	85427328	3916433	269818	859	324	33842	40	0.468234	0.453749
BWWYS	Relaxed-Norm-Meta	Delaware_CSP1621	Viral MetaG CB_1508_1S	Virus fraction	Accel-NGS 1S Plus	17	Relaxed	Read normalization	Metagenome	176044553	39301696	287884	351700	535	302	26054	5	0.127221	0.56194
BWWYS	Relaxed-None-SingleCell	Delaware_CSP1621	Viral MetaG CB_1508_1S	Virus fraction	Accel-NGS 1S Plus	17	Relaxed	None	Single-cell	192143372	82434223	7118790	282484	798	321	57096	30	0.363927	0.434546
BWWYS	Relaxed-Dedup-SingleCell	Delaware_CSP1621	Viral MetaG CB_1508_1S	Virus fraction	Accel-NGS 1S Plus	17	Relaxed	Read deduplication	Single-cell	213120733	102582493	21142017	284067	932	330	106704	51	0.497161	0.388903
BWWYS	Relaxed-Norm-SingleCell	Delaware_CSP1621	Viral MetaG CB_1508_1S	Virus fraction	Accel-NGS 1S Plus	17	Relaxed	Read normalization	Single-cell	190653012	82869203	7243599	277687	812	322	76727	30	0.362016	0.43845
BWWYX	Strict-None-Meta	Delaware_CSP1621	Viral MetaG DEL_Mar_4	Virus fraction	Accel-NGS 1S Plus	15	Strict	None	Metagenome	154318151	36994658	140436	308009	559	301	42539	9	0.243278	0.596087
BWWYX	Strict-Dedup-Meta	Delaware_CSP1621	Viral MetaG DEL_Mar_4	Virus fraction	Accel-NGS 1S Plus	15	Strict	Read deduplication	Metagenome	165990650	82980779	2177860	220299	999	334	42539	35	0.421784	0.461064
BWWYX	Strict-Norm-Meta	Delaware_CSP1621	Viral MetaG DEL_Mar_4	Virus fraction	Accel-NGS 1S Plus	15	Strict	Read normalization	Metagenome	153070445	37213306	129631	300805	565	303	42543	9	0.241849	0.594781
BWWYX	Strict-None-SingleCell	Delaware_CSP1621	Viral MetaG DEL_Mar_4	Virus fraction	Accel-NGS 1S Plus	15	Strict	None	Single-cell	166297319	85164215	9703838	213266	1043	333	78632	22	0.258324	0.399276
BWWYX	Strict-Dedup-SingleCell	Delaware_CSP1621	Viral MetaG DEL_Mar_4	Virus fraction	Accel-NGS 1S Plus	15	Strict	Read deduplication	Single-cell	181313423	104003531	28487645	204934	1359	347	223771	44	0.423063	0.316655
BWWYX	Strict-Norm-SingleCell	Delaware_CSP1621	Viral MetaG DEL_Mar_4	Virus fraction	Accel-NGS 1S Plus	15	Strict	Read normalization	Single-cell	166116723	85766407	10587927	210918	1059	335	51715	21	0.244851	0.387449
BWWYX	Relaxed-None-Meta	Delaware_CSP1621	Viral MetaG DEL_Mar_4	Virus fraction	Accel-NGS 1S Plus	15	Relaxed	None	Metagenome	164812763	43223712	378301	329551	579	298	42542	8	0.185084	0.583875
BWWYX	Relaxed-Dedup-Meta	Delaware_CSP1621	Viral MetaG DEL_Mar_4	Virus fraction	Accel-NGS 1S Plus	15	Relaxed	Read deduplication	Metagenome	172721518	92597462	7233584	214164	1135	338	44948	41	0.442777	0.404387
BWWYX	Relaxed-Norm-Meta	Delaware_CSP1621	Viral MetaG DEL_Mar_4	Virus fraction	Accel-NGS 1S Plus	15	Relaxed	Read normalization	Metagenome	162355950	43649988	228948	317013	589	301	42541	10	0.229095	0.579889
BWWYX	Relaxed-None-SingleCell	Delaware_CSP1621	Viral MetaG DEL_Mar_4	Virus fraction	Accel-NGS 1S Plus	15	Relaxed	None	Single-cell	175722630	92549196	14159631	219383	1101	335	81477	28	0.302542	0.377759
BWWYX	Relaxed-Dedup-SingleCell	Delaware_CSP1621	Viral MetaG DEL_Mar_4	Virus fraction	Accel-NGS 1S Plus	15	Relaxed	Read deduplication	Single-cell	189897862	109613061	33112561	211332	1403	347	184516	39	0.355797	0.315097
BWWYX	Relaxed-Norm-SingleCell	Delaware_CSP1621	Viral MetaG DEL_Mar_4	Virus fraction	Accel-NGS 1S Plus	15	Relaxed	Read normalization	Single-cell	174459720	92982506	14760093	214825	1130	337	65878	29	0.311887	0.371359
BWWYY	Strict-None-Meta	Delaware_CSP1621	Viral MetaG DEL_Mar_21	Virus fraction	Accel-NGS 1S Plus	15	Strict	None	Metagenome	232093833	54383750	669664	453202	545	304	55829	27	0.496472	0.530074
BWWYY	Strict-Dedup-Meta	Delaware_CSP1621	Viral MetaG DEL_Mar_21	Virus fraction	Accel-NGS 1S Plus	15	Strict	Read deduplication	Metagenome	242304284	111902782	3608537	341240	888	325	57575	59	0.527243	0.440819
BWWYY	Strict-Norm-Meta	Delaware_CSP1621	Viral MetaG DEL_Mar_21	Virus fraction	Accel-NGS 1S Plus	15	Strict	Read normalization	Metagenome	230745625	54572142	452203	446451	548	305	36926	25	0.458109	0.5402
BWWYY	Strict-None-SingleCell	Delaware_CSP1621	Viral MetaG DEL_Mar_21	Virus fraction	Accel-NGS 1S Plus	15	Strict	None	Single-cell	250679299	112704379	10089172	356691	849	324	62802	58	0.514621	0.411515
BWWYY	Strict-Dedup-SingleCell	Delaware_CSP1621	Viral MetaG DEL_Mar_21	Virus fraction	Accel-NGS 1S Plus	15	Strict	Read deduplication	Single-cell	273798704	137181078	30055381	351660	1003	334	107282	74	0.539433	0.347526
BWWYY	Strict-Norm-SingleCell	Delaware_CSP1621	Viral MetaG DEL_Mar_21	Virus fraction	Accel-NGS 1S Plus	15	Strict	Read normalization	Single-cell	249503521	113664929	10984713	351231	864	325	43188	55	0.483878	0.398667
BWWYY	Relaxed-None-Meta	Delaware_CSP1621	Viral MetaG DEL_Mar_21	Virus fraction	Accel-NGS 1S Plus	15	Relaxed	None	Metagenome	248012607	65447197	1451488	474171	570	304	40545	27	0.412546	0.532628
BWWYY	Relaxed-Dedup-Meta	Delaware_CSP1621	Viral MetaG DEL_Mar_21	Virus fraction	Accel-NGS 1S Plus	15	Relaxed	Read deduplication	Metagenome	255642001	122794493	7883890	348376	937	327	57575	66	0.537483	0.40939
BWWYY	Relaxed-Norm-Meta	Delaware_CSP1621	Viral MetaG DEL_Mar_21	Virus fraction	Accel-NGS 1S Plus	15	Relaxed	Read normalization	Metagenome	245075008	65744289	1122959	462487	576	305	38705	28	0.425893	0.523728
BWWYY	Relaxed-None-SingleCell	Delaware_CSP1621	Viral MetaG DEL_Mar_21	Virus fraction	Accel-NGS 1S Plus	15	Relaxed	None	Single-cell	268977259	124146109	13916069	375537	878	325	57286	58	0.467191	0.406816
BWWYY	Relaxed-Dedup-SingleCell	Delaware_CSP1621	Viral MetaG DEL_Mar_21	Virus fraction	Accel-NGS 1S Plus	15	Relaxed	Read deduplication	Single-cell	291737278	146119034	33829403	374265	1003	334	115094	82	0.561186	0.358331
BWWYY	Relaxed-Norm-SingleCell	Delaware_CSP1621	Viral MetaG DEL_Mar_21	Virus fraction	Accel-NGS 1S Plus	15	Relaxed	Read normalization	Single-cell	265547714	124720120	14924172	365093	902	327	51181	57	0.457023	0.402619
BWWYZ	Strict-None-Meta	Delaware_CSP1621	Viral MetaG DEL_Nov_12	Virus fraction	Accel-NGS 1S Plus	15	Strict	None	Metagenome	122699301	26060069	590424	251644	506	299	43762	10	0.383729	0.542561
BWWYZ	Strict-Dedup-Meta	Delaware_CSP1621	Viral MetaG DEL_Nov_12	Virus fraction	Accel-NGS 1S Plus	15	Strict	Read deduplication	Metagenome	133750045	52732610	2025594	211304	718	313	39682	34	0.644762	0.459216
BWWYZ	Strict-Norm-Meta	Delaware_CSP1621	Viral MetaG DEL_Nov_12	Virus fraction	Accel-NGS 1S Plus	15	Strict	Read normalization	Metagenome	120584379	25820809	293501	244118	510	300	34955	10	0.387285	0.552419
BWWYZ	Strict-None-SingleCell	Delaware_CSP1621	Viral MetaG DEL_Nov_12	Virus fraction	Accel-NGS 1S Plus	15	Strict	None	Single-cell	131095163	52660724	4818099	204736	723	313	46795	27	0.512716	0.435864
BWWYZ	Strict-Dedup-SingleCell	Delaware_CSP1621	Viral MetaG DEL_Nov_12	Virus fraction	Accel-NGS 1S Plus	15	Strict	Read deduplication	Single-cell	150250777	65204085	15125562	221498	782	316	129902	43	0.659468	0.386376
BWWYZ	Strict-Norm-SingleCell	Delaware_CSP1621	Viral MetaG DEL_Nov_12	Virus fraction	Accel-NGS 1S Plus	15	Strict	Read normalization	Single-cell	129048094	53444226	6014082	197057	751	314	58490	29	0.542622	0.42699
BWWYZ	Relaxed-None-Meta	Delaware_CSP1621	Viral MetaG DEL_Nov_12	Virus fraction	Accel-NGS 1S Plus	15	Relaxed	None	Metagenome	132163200	31181678	1173691	266618	521	299	44445	14	0.448982	0.530054
BWWYZ	Relaxed-Dedup-Meta	Delaware_CSP1621	Viral MetaG DEL_Nov_12	Virus fraction	Accel-NGS 1S Plus	15	Relaxed	Read deduplication	Metagenome	142405517	59251400	4232455	218208	752	313	46385	32	0.540072	0.439244
BWWYZ	Relaxed-Norm-Meta	Delaware_CSP1621	Viral MetaG DEL_Nov_12	Virus fraction	Accel-NGS 1S Plus	15	Relaxed	Read normalization	Metagenome	128925975	31260312	720655	255497	529	301	38173	13	0.415863	0.537077
BWWYZ	Relaxed-None-SingleCell	Delaware_CSP1621	Viral MetaG DEL_Nov_12	Virus fraction	Accel-NGS 1S Plus	15	Relaxed	None	Single-cell	141790066	58403910	6744967	218019	739	313	45960	32	0.547909	0.423236
BWWYZ	Relaxed-Dedup-SingleCell	Delaware_CSP1621	Viral MetaG DEL_Nov_12	Virus fraction	Accel-NGS 1S Plus	15	Relaxed	Read deduplication	Single-cell	161715188	69848399	16383576	238120	774	316	162968	33	0.472452	0.376043
BWWYZ	Relaxed-Norm-SingleCell	Delaware_CSP1621	Viral MetaG DEL_Nov_12	Virus fraction	Accel-NGS 1S Plus	15	Relaxed	Read normalization	Single-cell	138510059	59950893	9581990	205373	786	316	60689	37	0.617172	0.40182
BWWZA	Strict-None-Meta	Delaware_CSP1621	Viral MetaG DEL_Aug_28	Virus fraction	Accel-NGS 1S Plus	15	Strict	None	Metagenome	165066251	37056050	33458	341470	541	297	12001	12	0.323834	0.599445
BWWZA	Strict-Dedup-Meta	Delaware_CSP1621	Viral MetaG DEL_Aug_28	Virus fraction	Accel-NGS 1S Plus	15	Strict	Read deduplication	Metagenome	178361006	85493943	1782514	244226	937	331	19361	41	0.479566	0.466471
BWWZA	Strict-Norm-Meta	Delaware_CSP1621	Viral MetaG DEL_Aug_28	Virus fraction	Accel-NGS 1S Plus	15	Strict	Read normalization	Metagenome	162580156	37544516	22320	326590	548	301	11414	14	0.372891	0.597797
BWWZA	Strict-None-SingleCell	Delaware_CSP1621	Viral MetaG DEL_Aug_28	Virus fraction	Accel-NGS 1S Plus	15	Strict	None	Single-cell	176692693	87776700	8041679	233390	989	331	66750	34	0.387347	0.40288
BWWZA	Strict-Dedup-SingleCell	Delaware_CSP1621	Viral MetaG DEL_Aug_28	Virus fraction	Accel-NGS 1S Plus	15	Strict	Read deduplication	Single-cell	195185576	109245867	24514362	226604	1283	344	266304	55	0.503452	0.347683
BWWZA	Strict-Norm-SingleCell	Delaware_CSP1621	Viral MetaG DEL_Aug_28	Virus fraction	Accel-NGS 1S Plus	15	Strict	Read normalization	Single-cell	176580820	88497018	8459200	231073	1004	332	45405	35	0.395494	0.409795
BWWZA	Relaxed-None-Meta	Delaware_CSP1621	Viral MetaG DEL_Aug_28	Virus fraction	Accel-NGS 1S Plus	15	Relaxed	None	Metagenome	174123731	42679893	231523	359856	559	295	23443	17	0.398314	0.597928
BWWZA	Relaxed-Dedup-Meta	Delaware_CSP1621	Viral MetaG DEL_Aug_28	Virus fraction	Accel-NGS 1S Plus	15	Relaxed	Read deduplication	Metagenome	184091713	92991015	5779738	240393	1017	333	51129	44	0.473164	0.415732
BWWZA	Relaxed-Norm-Meta	Delaware_CSP1621	Viral MetaG DEL_Aug_28	Virus fraction	Accel-NGS 1S Plus	15	Relaxed	Read normalization	Metagenome	170570235	43495115	108085	339251	571	300	17424	17	0.390848	0.587726
BWWZA	Relaxed-None-SingleCell	Delaware_CSP1621	Viral MetaG DEL_Aug_28	Virus fraction	Accel-NGS 1S Plus	15	Relaxed	None	Single-cell	185807076	94783171	12142638	239507	1036	331	129122	41	0.432566	0.386432
BWWZA	Relaxed-Dedup-SingleCell	Delaware_CSP1621	Viral MetaG DEL_Aug_28	Virus fraction	Accel-NGS 1S Plus	15	Relaxed	Read deduplication	Single-cell	202577347	113515568	29981225	233659	1300	343	392100	56	0.493324	0.326527
BWWZA	Relaxed-Norm-SingleCell	Delaware_CSP1621	Viral MetaG DEL_Aug_28	Virus fraction	Accel-NGS 1S Plus	15	Relaxed	Read normalization	Single-cell	185063007	95670093	12082753	235273	1063	333	68240	39	0.407651	0.386752
BWWZB	Strict-None-Meta	Delaware_CSP1621	Viral MetaG DEL_Aug_30	Virus fraction	Accel-NGS 1S Plus	15	Strict	None	Metagenome	135757323	25864835	93725	290650	510	296	20933	6	0.231975	0.616969
BWWZB	Strict-Dedup-Meta	Delaware_CSP1621	Viral MetaG DEL_Aug_30	Virus fraction	Accel-NGS 1S Plus	15	Strict	Read deduplication	Metagenome	147827384	60014035	756534	224005	767	323	20411	28	0.466558	0.490533
BWWZB	Strict-Norm-Meta	Delaware_CSP1621	Viral MetaG DEL_Aug_30	Virus fraction	Accel-NGS 1S Plus	15	Strict	Read normalization	Metagenome	133496945	26199844	48328	277425	516	299	13882	5	0.190841	0.615966
BWWZB	Strict-None-SingleCell	Delaware_CSP1621	Viral MetaG DEL_Aug_30	Virus fraction	Accel-NGS 1S Plus	15	Strict	None	Single-cell	144782642	61841671	5094850	212479	796	321	43136	18	0.291066	0.446382
BWWZB	Strict-Dedup-SingleCell	Delaware_CSP1621	Viral MetaG DEL_Aug_30	Virus fraction	Accel-NGS 1S Plus	15	Strict	Read deduplication	Single-cell	162370845	78568822	14987673	215014	945	331	150043	52	0.66184	0.389674
BWWZB	Strict-Norm-SingleCell	Delaware_CSP1621	Viral MetaG DEL_Aug_30	Virus fraction	Accel-NGS 1S Plus	15	Strict	Read normalization	Single-cell	144841265	62635257	5323320	210909	807	322	42424	21	0.335274	0.435477
BWWZB	Relaxed-None-Meta	Delaware_CSP1621	Viral MetaG DEL_Aug_30	Virus fraction	Accel-NGS 1S Plus	15	Relaxed	None	Metagenome	141608090	28868963	221623	302228	520	295	25220	8	0.277114	0.60609
BWWZB	Relaxed-Dedup-Meta	Delaware_CSP1621	Viral MetaG DEL_Aug_30	Virus fraction	Accel-NGS 1S Plus	15	Relaxed	Read deduplication	Metagenome	151658446	65384615	3905632	220761	807	324	42512	27	0.412941	0.453157
BWWZB	Relaxed-Norm-Meta	Delaware_CSP1621	Viral MetaG DEL_Aug_30	Virus fraction	Accel-NGS 1S Plus	15	Relaxed	Read normalization	Metagenome	138877308	29484921	178143	286734	527	299	35292	8	0.271325	0.606522
BWWZB	Relaxed-None-SingleCell	Delaware_CSP1621	Viral MetaG DEL_Aug_30	Virus fraction	Accel-NGS 1S Plus	15	Relaxed	None	Single-cell	150982875	66709854	7336064	216837	827	322	63554	27	0.404738	0.431966
BWWZB	Relaxed-Dedup-SingleCell	Delaware_CSP1621	Viral MetaG DEL_Aug_30	Virus fraction	Accel-NGS 1S Plus	15	Relaxed	Read deduplication	Single-cell	167472143	81520452	17603516	220466	952	331	150179	51	0.62561	0.375799
BWWZB	Relaxed-Norm-SingleCell	Delaware_CSP1621	Viral MetaG DEL_Aug_30	Virus fraction	Accel-NGS 1S Plus	15	Relaxed	Read normalization	Single-cell	150366376	67014170	7186289	214676	835	323	48680	24	0.358133	0.423736
BXTTP	Strict-None-Meta	Delaware_CSP1621	Viral MetaG CB_1508_1M	Virus fraction	Nextera XT	20	Strict	None	Metagenome	28861152	3561634	107176	67130	406	286	34187	1	0.28077	0.534709
BXTTP	Strict-Dedup-Meta	Delaware_CSP1621	Viral MetaG CB_1508_1M	Virus fraction	Nextera XT	20	Strict	Read deduplication	Metagenome	27550076	3099019	80011	64230	403	288	34198	0	0	0.538346
BXTTP	Strict-Norm-Meta	Delaware_CSP1621	Viral MetaG CB_1508_1M	Virus fraction	Nextera XT	20	Strict	Read normalization	Metagenome	28903312	3337995	84217	67537	405	287	34187	0	0	0.543772
BXTTP	Strict-None-SingleCell	Delaware_CSP1621	Viral MetaG CB_1508_1M	Virus fraction	Nextera XT	20	Strict	None	Single-cell	28615979	5009041	222963	62160	434	287	35787	2	0.399278	0.507473
BXTTP	Strict-Dedup-SingleCell	Delaware_CSP1621	Viral MetaG CB_1508_1M	Virus fraction	Nextera XT	20	Strict	Read deduplication	Single-cell	29117263	5394689	285548	61838	448	288	35770	2	0.370735	0.504877
BXTTP	Strict-Norm-SingleCell	Delaware_CSP1621	Viral MetaG CB_1508_1M	Virus fraction	Nextera XT	20	Strict	Read normalization	Single-cell	28252412	4698472	179285	61709	433	287	34187	1	0.212835	0.518375
BXTTP	Relaxed-None-Meta	Delaware_CSP1621	Viral MetaG CB_1508_1M	Virus fraction	Nextera XT	20	Relaxed	None	Metagenome	30413635	3377846	89154	71611	402	287	34187	0	0	0.538087
BXTTP	Relaxed-Dedup-Meta	Delaware_CSP1621	Viral MetaG CB_1508_1M	Virus fraction	Nextera XT	20	Relaxed	Read deduplication	Metagenome	28189890	2812761	56043	66143	403	289	34198	0	0	0.545492
BXTTP	Relaxed-Norm-Meta	Delaware_CSP1621	Viral MetaG CB_1508_1M	Virus fraction	Nextera XT	20	Relaxed	Read normalization	Metagenome	29930520	3365936	87925	70363	403	287	34187	0	0	0.543983
BXTTP	Relaxed-None-SingleCell	Delaware_CSP1621	Viral MetaG CB_1508_1M	Virus fraction	Nextera XT	20	Relaxed	None	Single-cell	30356899	5260566	321532	65714	436	288	35923	1	0.190094	0.501526
BXTTP	Relaxed-Dedup-SingleCell	Delaware_CSP1621	Viral MetaG CB_1508_1M	Virus fraction	Nextera XT	20	Relaxed	Read deduplication	Single-cell	31156452	5619198	357942	65672	456	291	34187	1	0.177961	0.507617
BXTTP	Relaxed-Norm-SingleCell	Delaware_CSP1621	Viral MetaG CB_1508_1M	Virus fraction	Nextera XT	20	Relaxed	Read normalization	Single-cell	29633172	4973239	231340	64471	435	288	35923	0	0	0.515862
BXTTS	Strict-None-Meta	Delaware_CSP1621	Viral MetaG CB_1508_1D	Virus fraction	Nextera XT	20	Strict	None	Metagenome	7670296	973387		18390	387	284	9793	1	1.02734	0.506796
BXTTS	Strict-Dedup-Meta	Delaware_CSP1621	Viral MetaG CB_1508_1D	Virus fraction	Nextera XT	20	Strict	Read deduplication	Metagenome	6971025	827368		16735	386	285	9261	0	0	0.544393
BXTTS	Strict-Norm-Meta	Delaware_CSP1621	Viral MetaG CB_1508_1D	Virus fraction	Nextera XT	20	Strict	Read normalization	Metagenome	7559407	892631	10102	18130	388	285	10102	2	2.24057	0.5625
BXTTS	Strict-None-SingleCell	Delaware_CSP1621	Viral MetaG CB_1508_1D	Virus fraction	Nextera XT	20	Strict	None	Single-cell	7734621	1311972	52475	17581	404	284	14706	1	0.762211	0.48743
BXTTS	Strict-Dedup-SingleCell	Delaware_CSP1621	Viral MetaG CB_1508_1D	Virus fraction	Nextera XT	20	Strict	Read deduplication	Single-cell	7504353	1344937	47315	16688	414	285	19071	1	0.743529	0.491459
BXTTS	Strict-Norm-SingleCell	Delaware_CSP1621	Viral MetaG CB_1508_1D	Virus fraction	Nextera XT	20	Strict	Read normalization	Single-cell	7385229	1157968	11108	16789	406	285	11108	1	0.863582	0.531348
BXTTS	Relaxed-None-Meta	Delaware_CSP1621	Viral MetaG CB_1508_1D	Virus fraction	Nextera XT	20	Relaxed	None	Metagenome	8712134	969771	10224	20966	388	285	10224	0	0	0.539347
BXTTS	Relaxed-Dedup-Meta	Delaware_CSP1621	Viral MetaG CB_1508_1D	Virus fraction	Nextera XT	20	Relaxed	Read deduplication	Metagenome	8252685	749175		20159	383	286	7456	0	0	0.555276
BXTTS	Relaxed-Norm-Meta	Delaware_CSP1621	Viral MetaG CB_1508_1D	Virus fraction	Nextera XT	20	Relaxed	Read normalization	Metagenome	8235848	970418		19760	388	285	9855	1	1.03048	0.54902
BXTTS	Relaxed-None-SingleCell	Delaware_CSP1621	Viral MetaG CB_1508_1D	Virus fraction	Nextera XT	20	Relaxed	None	Single-cell	8860904	1490155	81975	19722	416	286	22709	2	1.34214	0.47088
BXTTS	Relaxed-Dedup-SingleCell	Delaware_CSP1621	Viral MetaG CB_1508_1D	Virus fraction	Nextera XT	20	Relaxed	Read deduplication	Single-cell	8916309	1491123	37682	19755	419	287	14032	0	0	0.481527
BXTTS	Relaxed-Norm-SingleCell	Delaware_CSP1621	Viral MetaG CB_1508_1D	Virus fraction	Nextera XT	20	Relaxed	Read normalization	Single-cell	8173031	1338125	44558	18386	410	286	11714	1	0.747314	0.508844
BXTUA	Strict-None-Meta	Delaware_CSP1621	Viral MetaG DEL_Aug_31	Virus fraction	Nextera XT	20	Strict	None	Metagenome	94769335	27354355	1629408	175476	560	295	85115	20	0.731145	0.500052
BXTUA	Strict-Dedup-Meta	Delaware_CSP1621	Viral MetaG DEL_Aug_31	Virus fraction	Nextera XT	20	Strict	Read deduplication	Metagenome	91616090	27077384	1967356	163926	576	302	84946	22	0.812486	0.491608
BXTUA	Strict-Norm-Meta	Delaware_CSP1621	Viral MetaG DEL_Aug_31	Virus fraction	Nextera XT	20	Strict	Read normalization	Metagenome	94941764	27441822	1564429	174880	565	296	85154	21	0.765255	0.496952
BXTUA	Strict-None-SingleCell	Delaware_CSP1621	Viral MetaG DEL_Aug_31	Virus fraction	Nextera XT	20	Strict	None	Single-cell	94484076	34759136	3021552	154515	681	303	85072	36	1.0357	0.468118
BXTUA	Strict-Dedup-SingleCell	Delaware_CSP1621	Viral MetaG DEL_Aug_31	Virus fraction	Nextera XT	20	Strict	Read deduplication	Single-cell	96704914	38518488	4085153	150443	736	308	85115	55	1.42789	0.447657
BXTUA	Strict-Norm-SingleCell	Delaware_CSP1621	Viral MetaG DEL_Aug_31	Virus fraction	Nextera XT	20	Strict	Read normalization	Single-cell	94408201	34682557	2480048	154142	682	303	85072	37	1.06682	0.481855
BXTUA	Relaxed-None-Meta	Delaware_CSP1621	Viral MetaG DEL_Aug_31	Virus fraction	Nextera XT	20	Relaxed	None	Metagenome	101891005	30151882	2004268	187009	568	296	85127	25	0.829136	0.5
BXTUA	Relaxed-Dedup-Meta	Delaware_CSP1621	Viral MetaG DEL_Aug_31	Virus fraction	Nextera XT	20	Relaxed	Read deduplication	Metagenome	96091644	28540635	2145385	169998	581	307	84701	23	0.805869	0.509786
BXTUA	Relaxed-Norm-Meta	Delaware_CSP1621	Viral MetaG DEL_Aug_31	Virus fraction	Nextera XT	20	Relaxed	Read normalization	Metagenome	101589063	30163127	1767472	185557	572	297	85154	26	0.86198	0.496724
BXTUA	Relaxed-None-SingleCell	Delaware_CSP1621	Viral MetaG DEL_Aug_31	Virus fraction	Nextera XT	20	Relaxed	None	Single-cell	102615393	39013413	3522950	165197	700	305	85156	46	1.17908	0.47875
BXTUA	Relaxed-Dedup-SingleCell	Delaware_CSP1621	Viral MetaG DEL_Aug_31	Virus fraction	Nextera XT	20	Relaxed	Read deduplication	Single-cell	103963344	42802932	4544230	157176	763	316	85123	100	2.33629	0.466755
BXTUA	Relaxed-Norm-SingleCell	Delaware_CSP1621	Viral MetaG DEL_Aug_31	Virus fraction	Nextera XT	20	Relaxed	Read normalization	Single-cell	101665583	38752547	2966337	163016	704	306	85288	48	1.23863	0.479563
BYGTS	Strict-None-Meta	Delaware_CSP1621	Viral MetaG DEL_Mar_4	Virus fraction	Nextera XT	18	Strict	None	Metagenome	110625217	23041353	1227835	241840	449	291	58731	2	0.0868005	0.52281
BYGTS	Strict-Dedup-Meta	Delaware_CSP1621	Viral MetaG DEL_Mar_4	Virus fraction	Nextera XT	18	Strict	Read deduplication	Metagenome	139714871	30942636	1563782	278876	482	299	57446	9	0.290861	0.522237
BYGTS	Strict-Norm-Meta	Delaware_CSP1621	Viral MetaG DEL_Mar_4	Virus fraction	Nextera XT	18	Strict	Read normalization	Metagenome	109840178	23005548	975071	238009	452	291	53485	5	0.217339	0.532383
BYGTS	Strict-None-SingleCell	Delaware_CSP1621	Viral MetaG DEL_Mar_4	Virus fraction	Nextera XT	18	Strict	None	Single-cell	120751307	53011300	2422983	176979	842	316	42539	33	0.622509	0.484612
BYGTS	Strict-Dedup-SingleCell	Delaware_CSP1621	Viral MetaG DEL_Mar_4	Virus fraction	Nextera XT	18	Strict	Read deduplication	Single-cell	168234042	87146664	15243343	212445	1067	334	85115	71	0.814719	0.379612
BYGTS	Strict-Norm-SingleCell	Delaware_CSP1621	Viral MetaG DEL_Mar_4	Virus fraction	Nextera XT	18	Strict	Read normalization	Single-cell	119824412	53213750	2640668	172838	853	318	42539	31	0.582556	0.478019
BYGTS	Relaxed-None-Meta	Delaware_CSP1621	Viral MetaG DEL_Mar_4	Virus fraction	Nextera XT	18	Relaxed	None	Metagenome	143382678	43016816	3130169	286158	523	291	84994	15	0.348701	0.486911
BYGTS	Relaxed-Dedup-Meta	Delaware_CSP1621	Viral MetaG DEL_Mar_4	Virus fraction	Nextera XT	18	Relaxed	Read deduplication	Metagenome	169212444	48481677	3462006	311106	536	304	85117	21	0.433153	0.483604
BYGTS	Relaxed-Norm-Meta	Delaware_CSP1621	Viral MetaG DEL_Mar_4	Virus fraction	Nextera XT	18	Relaxed	Read normalization	Metagenome	141837685	43230843	2907893	279693	532	292	85098	17	0.393238	0.479669
BYGTS	Relaxed-None-SingleCell	Delaware_CSP1621	Viral MetaG DEL_Mar_4	Virus fraction	Nextera XT	18	Relaxed	None	Single-cell	151908357	75371215	9425658	203481	986	320	85109	53	0.703186	0.41165
BYGTS	Relaxed-Dedup-SingleCell	Delaware_CSP1621	Viral MetaG DEL_Mar_4	Virus fraction	Nextera XT	18	Relaxed	Read deduplication	Single-cell	194461249	100257341	21961852	246883	1058	332	109341	112	1.11713	0.362791
BYGTS	Relaxed-Norm-SingleCell	Delaware_CSP1621	Viral MetaG DEL_Mar_4	Virus fraction	Nextera XT	18	Relaxed	Read normalization	Single-cell	149242281	75577857	9788125	194721	1021	323	85115	50	0.661569	0.407067
BYGTT	Strict-None-Meta	Delaware_CSP1621	Viral MetaG DEL_Mar_21	Virus fraction	Nextera XT	20	Strict	None	Metagenome	14555762	830422	11518	39688	355	282	11518	0	0	0.531807
BYGTT	Strict-Dedup-Meta	Delaware_CSP1621	Viral MetaG DEL_Mar_21	Virus fraction	Nextera XT	20	Strict	Read deduplication	Metagenome	22055266	1817587	58354	53999	379	290	21215	0	0	0.529206
BYGTT	Strict-Norm-Meta	Delaware_CSP1621	Viral MetaG DEL_Mar_21	Virus fraction	Nextera XT	20	Strict	Read normalization	Metagenome	14681976	725252	22763	40489	351	283	12153	0	0	0.533632
BYGTT	Strict-None-SingleCell	Delaware_CSP1621	Viral MetaG DEL_Mar_21	Virus fraction	Nextera XT	20	Strict	None	Single-cell	15874200	3453144	54547	31456	521	294	21353	3	0.868774	0.517915
BYGTT	Strict-Dedup-SingleCell	Delaware_CSP1621	Viral MetaG DEL_Mar_21	Virus fraction	Nextera XT	20	Strict	Read deduplication	Single-cell	26704415	7072900	390828	50233	529	300	44981	5	0.706924	0.451592
BYGTT	Strict-Norm-SingleCell	Delaware_CSP1621	Viral MetaG DEL_Mar_21	Virus fraction	Nextera XT	20	Strict	Read normalization	Single-cell	15072432	2784396	23140	31258	480	292	12814	3	1.07743	0.545271
BYGTT	Relaxed-None-Meta	Delaware_CSP1621	Viral MetaG DEL_Mar_21	Virus fraction	Nextera XT	20	Relaxed	None	Metagenome	18628584	1718263	126154	50254	360	282	38580	0	0	0.495825
BYGTT	Relaxed-Dedup-Meta	Delaware_CSP1621	Viral MetaG DEL_Mar_21	Virus fraction	Nextera XT	20	Relaxed	Read deduplication	Metagenome	27789738	2557144	126937	67337	384	291	57577	0	0	0.493121
BYGTT	Relaxed-Norm-Meta	Delaware_CSP1621	Viral MetaG DEL_Mar_21	Virus fraction	Nextera XT	20	Relaxed	Read normalization	Metagenome	18583369	1587263	132467	49871	362	283	36512	0	0	0.507926
BYGTT	Relaxed-None-SingleCell	Delaware_CSP1621	Viral MetaG DEL_Mar_21	Virus fraction	Nextera XT	20	Relaxed	None	Single-cell	21535188	5660898	270117	40263	557	298	45944	2	0.353301	0.473505
BYGTT	Relaxed-Dedup-SingleCell	Delaware_CSP1621	Viral MetaG DEL_Mar_21	Virus fraction	Nextera XT	20	Relaxed	Read deduplication	Single-cell	33796506	8648295	809294	63826	520	302	57575	2	0.231259	0.440352
BYGTT	Relaxed-Norm-SingleCell	Delaware_CSP1621	Viral MetaG DEL_Mar_21	Virus fraction	Nextera XT	20	Relaxed	Read normalization	Single-cell	20163045	4834473	162124	38948	528	296	53218	2	0.413696	0.47692
BYGTU	Strict-None-Meta	Delaware_CSP1621	Viral MetaG DEL_Nov_12	Virus fraction	Nextera XT	18	Strict	None	Metagenome	212403608	82109704	12124949	339881	702	309	118629	26	0.31665	0.420726
BYGTU	Strict-Dedup-Meta	Delaware_CSP1621	Viral MetaG DEL_Nov_12	Virus fraction	Nextera XT	18	Strict	Read deduplication	Metagenome	218540950	87709915	12981945	341261	734	311	96862	21	0.239426	0.422033
BYGTU	Strict-Norm-Meta	Delaware_CSP1621	Viral MetaG DEL_Nov_12	Virus fraction	Nextera XT	18	Strict	Read normalization	Metagenome	203334394	81609275	11408984	313016	738	313	118629	29	0.355352	0.420782
BYGTU	Strict-None-SingleCell	Delaware_CSP1621	Viral MetaG DEL_Nov_12	Virus fraction	Nextera XT	18	Strict	None	Single-cell	249706558	132542817	32575200	331456	1131	318	150597	39	0.294245	0.348964
BYGTU	Strict-Dedup-SingleCell	Delaware_CSP1621	Viral MetaG DEL_Nov_12	Virus fraction	Nextera XT	18	Strict	Read deduplication	Single-cell	252330209	133461185	33119725	336987	1123	318	165032	43	0.322191	0.346259
BYGTU	Strict-Norm-SingleCell	Delaware_CSP1621	Viral MetaG DEL_Nov_12	Virus fraction	Nextera XT	18	Strict	Read normalization	Single-cell	231352551	130565146	32919990	265612	1285	346	150869	37	0.283383	0.340596
BYGTU	Relaxed-None-Meta	Delaware_CSP1621	Viral MetaG DEL_Nov_12	Virus fraction	Nextera XT	18	Relaxed	None	Metagenome	399343201	128672273	24216281	709583	561	301	127283	27	0.209835	0.396145
BYGTU	Relaxed-Dedup-Meta	Delaware_CSP1621	Viral MetaG DEL_Nov_12	Virus fraction	Nextera XT	18	Relaxed	Read deduplication	Metagenome	405376713	131445703	23892925	714977	569	303	109598	30	0.228231	0.412458
BYGTU	Relaxed-Norm-Meta	Delaware_CSP1621	Viral MetaG DEL_Nov_12	Virus fraction	Nextera XT	18	Relaxed	Read normalization	Metagenome	335022476	126749402	23262892	539892	667	308	127283	29	0.228798	0.399719
BYGTU	Relaxed-None-SingleCell	Delaware_CSP1621	Viral MetaG DEL_Nov_12	Virus fraction	Nextera XT	18	Relaxed	None	Single-cell	499865110	203355395	45453463	794092	721	308	212274	52	0.25571	0.390113
BYGTU	Relaxed-Dedup-SingleCell	Delaware_CSP1621	Viral MetaG DEL_Nov_12	Virus fraction	Nextera XT	18	Relaxed	Read deduplication	Single-cell	505090912	204407674	46468170	802065	718	309	212274	46	0.22504	0.379634
BYGTU	Relaxed-Norm-SingleCell	Delaware_CSP1621	Viral MetaG DEL_Nov_12	Virus fraction	Nextera XT	18	Relaxed	Read normalization	Single-cell	387504199	192367017	45543827	506081	986	329	212274	55	0.285912	0.370535
BYGTW	Strict-None-Meta	Delaware_CSP1621	Viral MetaG DEL_Aug_28	Virus fraction	Nextera XT	20	Strict	None	Metagenome	74626148	11155776	396379	176738	408	288	27957	1	0.0896397	0.51883
BYGTW	Strict-Dedup-Meta	Delaware_CSP1621	Viral MetaG DEL_Aug_28	Virus fraction	Nextera XT	20	Strict	Read deduplication	Metagenome	97951458	17053613	685257	208656	442	296	42730	4	0.234554	0.512736
BYGTW	Strict-Norm-Meta	Delaware_CSP1621	Viral MetaG DEL_Aug_28	Virus fraction	Nextera XT	20	Strict	Read normalization	Metagenome	74049466	10971578	237342	174198	409	289	19700	3	0.273434	0.526795
BYGTW	Strict-None-SingleCell	Delaware_CSP1621	Viral MetaG DEL_Aug_28	Virus fraction	Nextera XT	20	Strict	None	Single-cell	80542269	28854482	924695	131988	700	308	39169	30	1.0397	0.500051
BYGTW	Strict-Dedup-SingleCell	Delaware_CSP1621	Viral MetaG DEL_Aug_28	Virus fraction	Nextera XT	20	Strict	Read deduplication	Single-cell	119245875	51047046	5110027	175909	796	321	138860	67	1.31251	0.438822
BYGTW	Strict-Norm-SingleCell	Delaware_CSP1621	Viral MetaG DEL_Aug_28	Virus fraction	Nextera XT	20	Strict	Read normalization	Single-cell	86803980	34295586	1596900	137003	755	310	37638	36	1.0497	0.48192
BYGTW	Relaxed-None-Meta	Delaware_CSP1621	Viral MetaG DEL_Aug_28	Virus fraction	Nextera XT	20	Relaxed	None	Metagenome	99086030	21764788	1430453	219029	449	289	85117	8	0.367566	0.492375
BYGTW	Relaxed-Dedup-Meta	Delaware_CSP1621	Viral MetaG DEL_Aug_28	Virus fraction	Nextera XT	20	Relaxed	Read deduplication	Metagenome	121352360	26240999	1592276	245069	470	299	85117	14	0.533516	0.506748
BYGTW	Relaxed-Norm-Meta	Delaware_CSP1621	Viral MetaG DEL_Aug_28	Virus fraction	Nextera XT	20	Relaxed	Read normalization	Metagenome	97852678	21769265	1476240	214231	453	289	85117	7	0.321554	0.497984
BYGTW	Relaxed-None-SingleCell	Delaware_CSP1621	Viral MetaG DEL_Aug_28	Virus fraction	Nextera XT	20	Relaxed	None	Single-cell	105731010	44422714	3753509	158697	797	313	85105	72	1.62079	0.447895
BYGTW	Relaxed-Dedup-SingleCell	Delaware_CSP1621	Viral MetaG DEL_Aug_28	Virus fraction	Nextera XT	20	Relaxed	Read deduplication	Single-cell	141063978	61427781	8044888	204667	813	322	89192	111	1.807	0.415934
BYGTW	Relaxed-Norm-SingleCell	Delaware_CSP1621	Viral MetaG DEL_Aug_28	Virus fraction	Nextera XT	20	Relaxed	Read normalization	Single-cell	109603981	48589823	4655654	158174	847	317	85091	75	1.54353	0.441038
BYGTX	Strict-None-Meta	Delaware_CSP1621	Viral MetaG DEL_Aug_30	Virus fraction	Nextera XT	18	Strict	None	Metagenome	108997252	19572583	1455641	244270	426	291	61159	5	0.255459	0.492811
BYGTX	Strict-Dedup-Meta	Delaware_CSP1621	Viral MetaG DEL_Aug_30	Virus fraction	Nextera XT	18	Strict	Read deduplication	Metagenome	134543629	25772991	1783689	279275	455	297	62522	16	0.620805	0.498535
BYGTX	Strict-Norm-Meta	Delaware_CSP1621	Viral MetaG DEL_Aug_30	Virus fraction	Nextera XT	18	Strict	Read normalization	Metagenome	108112180	19549984	1294622	240793	428	291	42539	5	0.255755	0.496931
BYGTX	Strict-None-SingleCell	Delaware_CSP1621	Viral MetaG DEL_Aug_30	Virus fraction	Nextera XT	18	Strict	None	Single-cell	118262297	45905998	2452249	185397	746	311	62522	43	0.936697	0.491516
BYGTX	Strict-Dedup-SingleCell	Delaware_CSP1621	Viral MetaG DEL_Aug_30	Virus fraction	Nextera XT	18	Strict	Read deduplication	Single-cell	164924293	73997893	9609591	233547	852	325	85069	82	1.10814	0.439068
BYGTX	Strict-Norm-SingleCell	Delaware_CSP1621	Viral MetaG DEL_Aug_30	Virus fraction	Nextera XT	18	Strict	Read normalization	Single-cell	117169522	45984529	2490393	181642	754	312	42469	47	1.02208	0.493673
BYGTX	Relaxed-None-Meta	Delaware_CSP1621	Viral MetaG DEL_Aug_30	Virus fraction	Nextera XT	18	Relaxed	None	Metagenome	145642424	37188867	3326778	299270	492	292	62524	26	0.699134	0.487275
BYGTX	Relaxed-Dedup-Meta	Delaware_CSP1621	Viral MetaG DEL_Aug_30	Virus fraction	Nextera XT	18	Relaxed	Read deduplication	Metagenome	166753140	41108299	3390309	320680	505	302	80610	26	0.632476	0.495915
BYGTX	Relaxed-Norm-Meta	Delaware_CSP1621	Viral MetaG DEL_Aug_30	Virus fraction	Nextera XT	18	Relaxed	Read normalization	Metagenome	143874131	37377917	3196236	292893	497	292	57773	25	0.668844	0.493013
BYGTX	Relaxed-None-SingleCell	Delaware_CSP1621	Viral MetaG DEL_Aug_30	Virus fraction	Nextera XT	18	Relaxed	None	Single-cell	151678891	67779483	6828152	219372	854	315	67866	82	1.20981	0.455088
BYGTX	Relaxed-Dedup-SingleCell	Delaware_CSP1621	Viral MetaG DEL_Aug_30	Virus fraction	Nextera XT	18	Relaxed	Read deduplication	Single-cell	192504856	88551089	12737797	268899	879	325	99738	144	1.62618	0.426122
BYGTX	Relaxed-Norm-SingleCell	Delaware_CSP1621	Viral MetaG DEL_Aug_30	Virus fraction	Nextera XT	18	Relaxed	Read normalization	Single-cell	148746266	67528385	7126851	211499	871	317	84979	83	1.22911	0.452764
BYXGO	Strict-None-Meta	Boncat_Soil	21hA_Boncat_minus	Microbial enrichment	Nextera XT	25	Strict	None	Metagenome	103319834	5996563		263831	371	284	9167			0.667426	1	0	0	1
BYXGO	Strict-Dedup-Meta	Boncat_Soil	21hA_Boncat_minus	Microbial enrichment	Nextera XT	25	Strict	Read deduplication	Metagenome	111430267	12792415	11053	243103	448	298	11053			0.663732	2	0	0	1
BYXGO	Strict-Norm-Meta	Boncat_Soil	21hA_Boncat_minus	Microbial enrichment	Nextera XT	25	Strict	Read normalization	Metagenome	103438265	6017431		265232	370	283	9167			0.680106	1	0	0	1
BYXGO	Strict-None-SingleCell	Boncat_Soil	21hA_Boncat_minus	Microbial enrichment	Nextera XT	25	Strict	None	Single-cell	106549637	11296055	23301	256674	390	284	12248			0.616552	2	0	0	1
BYXGO	Strict-Dedup-SingleCell	Boncat_Soil	21hA_Boncat_minus	Microbial enrichment	Nextera XT	25	Strict	Read deduplication	Single-cell	127998882	17849218	113562	275888	445	298	13382			0.584399	3	0	0	1
BYXGO	Strict-Norm-SingleCell	Boncat_Soil	21hA_Boncat_minus	Microbial enrichment	Nextera XT	25	Strict	Read normalization	Single-cell	104326832	11207678	23301	251317	390	284	12248			0.614583	2	0	0	1
BYXGO	Relaxed-None-Meta	Boncat_Soil	21hA_Boncat_minus	Microbial enrichment	Nextera XT	25	Relaxed	None	Metagenome	120489788	8002678	23850	302042	378	284	12795			0.670285	1	0	0	1
BYXGO	Relaxed-Dedup-Meta	Boncat_Soil	21hA_Boncat_minus	Microbial enrichment	Nextera XT	25	Relaxed	Read deduplication	Metagenome	133847730	15775013	31061	290102	451	299	20006			0.667115	3	0	0	1
BYXGO	Relaxed-Norm-Meta	Boncat_Soil	21hA_Boncat_minus	Microbial enrichment	Nextera XT	25	Relaxed	Read normalization	Metagenome	118452331	8204395	23850	296670	380	284	12795			0.673721	1	0	0	1
BYXGO	Relaxed-None-SingleCell	Boncat_Soil	21hA_Boncat_minus	Microbial enrichment	Nextera XT	25	Relaxed	None	Single-cell	127132169	15048927	42089	298450	401	285	20006			0.614717	2	0	0	2
BYXGO	Relaxed-Dedup-SingleCell	Boncat_Soil	21hA_Boncat_minus	Microbial enrichment	Nextera XT	25	Relaxed	Read deduplication	Single-cell	153601872	21855681	131778	329841	447	298	20019			0.591697	4	0	2	0
BYXGO	Relaxed-Norm-SingleCell	Boncat_Soil	21hA_Boncat_minus	Microbial enrichment	Nextera XT	25	Relaxed	Read normalization	Single-cell	118888233	14409553	31061	279415	400	285	20006			0.613421	2	0	0	1
BYXGP	Strict-None-Meta	Boncat_Soil	21hA_Boncat_plus	Microbial enrichment	Nextera XT	25	Strict	None	Metagenome	18616712	269445	41358	53720	326	281	41358			0.69697	0	0	0	0
BYXGP	Strict-Dedup-Meta	Boncat_Soil	21hA_Boncat_plus	Microbial enrichment	Nextera XT	25	Strict	Read deduplication	Metagenome	19385708	409610	28508	51591	358	285	28508			0.694737	0	0	0	0
BYXGP	Strict-Norm-Meta	Boncat_Soil	21hA_Boncat_plus	Microbial enrichment	Nextera XT	25	Strict	Read normalization	Metagenome	18413227	268174	41358	53203	325	281	41358			0.697279	0	0	0	0
BYXGP	Strict-None-SingleCell	Boncat_Soil	21hA_Boncat_plus	Microbial enrichment	Nextera XT	25	Strict	None	Single-cell	19005801	462574	45133	53636	331	281	45133			0.67037	0	0	0	0
BYXGP	Strict-Dedup-SingleCell	Boncat_Soil	21hA_Boncat_plus	Microbial enrichment	Nextera XT	25	Strict	Read deduplication	Single-cell	25911323	861695	45133	65639	380	287	45133			0.707317	0	0	0	0
BYXGP	Strict-Norm-SingleCell	Boncat_Soil	21hA_Boncat_plus	Microbial enrichment	Nextera XT	25	Strict	Read normalization	Single-cell	18827826	463932	45133	53149	331	281	45133			0.672222	0	0	0	0
BYXGP	Relaxed-None-Meta	Boncat_Soil	21hA_Boncat_plus	Microbial enrichment	Nextera XT	25	Relaxed	None	Metagenome	20009064	312724	41358	57438	328	281	41358			0.710674	0	0	0	0
BYXGP	Relaxed-Dedup-Meta	Boncat_Soil	21hA_Boncat_plus	Microbial enrichment	Nextera XT	25	Relaxed	Read deduplication	Metagenome	19649587	429458	29828	51720	363	286	15463			0.700803	0	0	0	0
BYXGP	Relaxed-Norm-Meta	Boncat_Soil	21hA_Boncat_plus	Microbial enrichment	Nextera XT	25	Relaxed	Read normalization	Metagenome	19524896	301390	41358	56167	327	281	41358			0.717201	0	0	0	0
BYXGP	Relaxed-None-SingleCell	Boncat_Soil	21hA_Boncat_plus	Microbial enrichment	Nextera XT	25	Relaxed	None	Single-cell	20677535	540495	39513	57817	335	282	39513			0.693271	0	0	0	0
BYXGP	Relaxed-Dedup-SingleCell	Boncat_Soil	21hA_Boncat_plus	Microbial enrichment	Nextera XT	25	Relaxed	Read deduplication	Single-cell	27287085	926985	39513	69277	378	288	39513			0.693727	0	0	0	0
BYXGP	Relaxed-Norm-SingleCell	Boncat_Soil	21hA_Boncat_plus	Microbial enrichment	Nextera XT	25	Relaxed	Read normalization	Single-cell	20078783	519944	45133	56334	333	282	45133			0.685575	0	0	0	0
BYXGS	Strict-None-Meta	Boncat_Soil	21hB_Boncat_minus	Microbial enrichment	Nextera XT	25	Strict	None	Metagenome	81533563	16500994	2149471	165059	488	289	77861			0.559528	4	0	0	3
BYXGS	Strict-Dedup-Meta	Boncat_Soil	21hB_Boncat_minus	Microbial enrichment	Nextera XT	25	Strict	Read deduplication	Metagenome	76510294	19201012	2141228	140719	559	307	114166			0.560179	5	0	0	4
BYXGS	Strict-Norm-Meta	Boncat_Soil	21hB_Boncat_minus	Microbial enrichment	Nextera XT	25	Strict	Read normalization	Metagenome	79283524	16197319	2129773	160322	489	289	77861			0.557149	4	0	0	3
BYXGS	Strict-None-SingleCell	Boncat_Soil	21hB_Boncat_minus	Microbial enrichment	Nextera XT	25	Strict	None	Single-cell	84535961	23191760	2277870	156404	557	292	131464			0.515483	6	0	0	4
BYXGS	Strict-Dedup-SingleCell	Boncat_Soil	21hB_Boncat_minus	Microbial enrichment	Nextera XT	25	Strict	Read deduplication	Single-cell	84660783	26028089	2320981	144394	619	315	190733			0.509409	6	0	1	3
BYXGS	Strict-Norm-SingleCell	Boncat_Soil	21hB_Boncat_minus	Microbial enrichment	Nextera XT	25	Strict	Read normalization	Single-cell	82010687	22605141	2251358	151335	560	291	129796			0.514647	6	0	1	0
BYXGS	Relaxed-None-Meta	Boncat_Soil	21hB_Boncat_minus	Microbial enrichment	Nextera XT	25	Relaxed	None	Metagenome	111733449	25904545	2206893	215796	523	295	81909			0.54383	6	0	0	3
BYXGS	Relaxed-Dedup-Meta	Boncat_Soil	21hB_Boncat_minus	Microbial enrichment	Nextera XT	25	Relaxed	Read deduplication	Metagenome	108455928	29565188	2158044	194446	584	309	127856			0.548216	5	0	0	3
BYXGS	Relaxed-Norm-Meta	Boncat_Soil	21hB_Boncat_minus	Microbial enrichment	Nextera XT	25	Relaxed	Read normalization	Metagenome	103289476	24551756	2199129	198079	530	294	81909			0.541873	6	0	0	2
BYXGS	Relaxed-None-SingleCell	Boncat_Soil	21hB_Boncat_minus	Microbial enrichment	Nextera XT	25	Relaxed	None	Single-cell	118493775	37111665	2507004	206188	612	302	161535			0.505554	7	0	0	4
BYXGS	Relaxed-Dedup-SingleCell	Boncat_Soil	21hB_Boncat_minus	Microbial enrichment	Nextera XT	25	Relaxed	Read deduplication	Single-cell	121732931	40668199	2658379	200810	651	317	168318			0.501659	7	0	1	3
BYXGS	Relaxed-Norm-SingleCell	Boncat_Soil	21hB_Boncat_minus	Microbial enrichment	Nextera XT	25	Relaxed	Read normalization	Single-cell	107447799	34499452	2483539	185178	623	301	159968			0.500387	8	0	0	4
BYXGT	Strict-None-Meta	Boncat_Soil	21hB_Boncat_plus	Microbial enrichment	Nextera XT	25	Strict	None	Metagenome	11945241	129273		34277	329	281	4318			0.626984	0	0	0	0
BYXGT	Strict-Dedup-Meta	Boncat_Soil	21hB_Boncat_plus	Microbial enrichment	Nextera XT	25	Strict	Read deduplication	Metagenome	12034399	198642		32329	356	283	4318			0.66055	0	0	0	0
BYXGT	Strict-Norm-Meta	Boncat_Soil	21hB_Boncat_plus	Microbial enrichment	Nextera XT	25	Strict	Read normalization	Metagenome	11839192	127229		34011	328	281	4318			0.620968	0	0	0	0
BYXGT	Strict-None-SingleCell	Boncat_Soil	21hB_Boncat_plus	Microbial enrichment	Nextera XT	25	Strict	None	Single-cell	12090956	194080		34043	334	282	4318			0.676617	0	0	0	0
BYXGT	Strict-Dedup-SingleCell	Boncat_Soil	21hB_Boncat_plus	Microbial enrichment	Nextera XT	25	Strict	Read deduplication	Single-cell	15075914	478597		38613	376	285	5395			0.684303	0	0	0	0
BYXGT	Strict-Norm-SingleCell	Boncat_Soil	21hB_Boncat_plus	Microbial enrichment	Nextera XT	25	Strict	Read normalization	Single-cell	12031320	199874		33830	334	282	4318			0.673077	0	0	0	0
BYXGT	Relaxed-None-Meta	Boncat_Soil	21hB_Boncat_plus	Microbial enrichment	Nextera XT	25	Relaxed	None	Metagenome	12643280	132509		36182	330	282	4318			0.646154	0	0	0	0
BYXGT	Relaxed-Dedup-Meta	Boncat_Soil	21hB_Boncat_plus	Microbial enrichment	Nextera XT	25	Relaxed	Read deduplication	Metagenome	11914502	191697		31554	362	285	4318			0.665138	0	0	0	0
BYXGT	Relaxed-Norm-Meta	Boncat_Soil	21hB_Boncat_plus	Microbial enrichment	Nextera XT	25	Relaxed	Read normalization	Metagenome	12376236	129251		35459	329	281	4318			0.64	0	0	0	0
BYXGT	Relaxed-None-SingleCell	Boncat_Soil	21hB_Boncat_plus	Microbial enrichment	Nextera XT	25	Relaxed	None	Single-cell	12928206	222629		36242	335	282	4318			0.665254	0	0	0	0
BYXGT	Relaxed-Dedup-SingleCell	Boncat_Soil	21hB_Boncat_plus	Microbial enrichment	Nextera XT	25	Relaxed	Read deduplication	Single-cell	15975941	491112		40642	378	287	4318			0.675302	0	0	0	0
BYXGT	Relaxed-Norm-SingleCell	Boncat_Soil	21hB_Boncat_plus	Microbial enrichment	Nextera XT	25	Relaxed	Read normalization	Single-cell	12619972	216508		35430	334	282	4318			0.672414	0	0	0	0
BYXGU	Strict-None-Meta	Boncat_Soil	21hC_Boncat_minus	Microbial enrichment	Nextera XT	25	Strict	None	Metagenome	123567470	19624308	15344	279941	415	285	15344			0.614297	2	0	0	4
BYXGU	Strict-Dedup-Meta	Boncat_Soil	21hC_Boncat_minus	Microbial enrichment	Nextera XT	25	Strict	Read deduplication	Metagenome	123843778	27255272	25570	242748	506	302	15436			0.608235	3	0	0	4
BYXGU	Strict-Norm-Meta	Boncat_Soil	21hC_Boncat_minus	Microbial enrichment	Nextera XT	25	Strict	Read normalization	Metagenome	125670591	19327383	15344	287936	414	284	15344			0.617084	3	0	0	4
BYXGU	Strict-None-SingleCell	Boncat_Soil	21hC_Boncat_minus	Microbial enrichment	Nextera XT	25	Strict	None	Single-cell	127133597	29354637	101331	265287	455	286	15436			0.561595	5	0	0	5
BYXGU	Strict-Dedup-SingleCell	Boncat_Soil	21hC_Boncat_minus	Microbial enrichment	Nextera XT	25	Strict	Read deduplication	Single-cell	139301238	35749937	475317	264077	511	303	20594			0.535809	7	0	1	3
BYXGU	Strict-Norm-SingleCell	Boncat_Soil	21hC_Boncat_minus	Microbial enrichment	Nextera XT	25	Strict	Read normalization	Single-cell	125158251	29203581	79658	260663	456	286	15436			0.562945	4	0	0	5
BYXGU	Relaxed-None-Meta	Boncat_Soil	21hC_Boncat_minus	Microbial enrichment	Nextera XT	25	Relaxed	None	Metagenome	146518966	24762620	66165	325808	423	286	20113			0.599672	3	0	0	4
BYXGU	Relaxed-Dedup-Meta	Boncat_Soil	21hC_Boncat_minus	Microbial enrichment	Nextera XT	25	Relaxed	Read deduplication	Metagenome	153307713	33970291	112949	299888	503	302	12903			0.598314	4	0	0	5
BYXGU	Relaxed-Norm-Meta	Boncat_Soil	21hC_Boncat_minus	Microbial enrichment	Nextera XT	25	Relaxed	Read normalization	Metagenome	145099943	25128558	54053	322717	427	285	20832			0.606922	3	0	0	4
BYXGU	Relaxed-None-SingleCell	Boncat_Soil	21hC_Boncat_minus	Microbial enrichment	Nextera XT	25	Relaxed	None	Single-cell	152670479	36598243	254121	312192	464	287	20832			0.555074	4	0	1	4
BYXGU	Relaxed-Dedup-SingleCell	Boncat_Soil	21hC_Boncat_minus	Microbial enrichment	Nextera XT	25	Relaxed	Read deduplication	Single-cell	172985281	43803715	824582	328983	507	302	22773			0.530389	7	0	1	3
BYXGU	Relaxed-Norm-SingleCell	Boncat_Soil	21hC_Boncat_minus	Microbial enrichment	Nextera XT	25	Relaxed	Read normalization	Single-cell	144111494	36288635	225777	291108	474	287	20832			0.551799	4	0	1	4
BYXGW	Strict-None-Meta	Boncat_Soil	21hC_Boncat_plus	Microbial enrichment	Nextera XT	25	Strict	None	Metagenome	70481420	3215240	20077	185678	359	283	20077			0.671033	1	0	0	0
BYXGW	Strict-Dedup-Meta	Boncat_Soil	21hC_Boncat_plus	Microbial enrichment	Nextera XT	25	Strict	Read deduplication	Metagenome	70223320	4879635	20077	169607	394	289	20077			0.655121	1	0	0	1
BYXGW	Strict-Norm-Meta	Boncat_Soil	21hC_Boncat_plus	Microbial enrichment	Nextera XT	25	Strict	Read normalization	Metagenome	73103565	3350771	20077	194846	357	282	20077			0.668969	1	0	0	0
BYXGW	Strict-None-SingleCell	Boncat_Soil	21hC_Boncat_plus	Microbial enrichment	Nextera XT	25	Strict	None	Single-cell	71148205	5395888	20077	179982	370	283	20077			0.620889	1	0	0	1
BYXGW	Strict-Dedup-SingleCell	Boncat_Soil	21hC_Boncat_plus	Microbial enrichment	Nextera XT	25	Strict	Read deduplication	Single-cell	89345803	8803142	55697	204689	419	291	20098			0.609532	3	0	0	2
BYXGW	Strict-Norm-SingleCell	Boncat_Soil	21hC_Boncat_plus	Microbial enrichment	Nextera XT	25	Strict	Read normalization	Single-cell	71113205	5533788	20077	179387	371	283	20077			0.622241	1	0	0	1
BYXGW	Relaxed-None-Meta	Boncat_Soil	21hC_Boncat_plus	Microbial enrichment	Nextera XT	25	Relaxed	None	Metagenome	76126237	3562462	20079	199167	361	283	20079			0.668597	1	0	0	0
BYXGW	Relaxed-Dedup-Meta	Boncat_Soil	21hC_Boncat_plus	Microbial enrichment	Nextera XT	25	Relaxed	Read deduplication	Metagenome	74117983	4943177	20079	178090	397	291	20079			0.663699	1	0	0	1
BYXGW	Relaxed-Norm-Meta	Boncat_Soil	21hC_Boncat_plus	Microbial enrichment	Nextera XT	25	Relaxed	Read normalization	Metagenome	78584441	3814330	20077	207570	360	283	20077			0.668613	1	0	0	0
BYXGW	Relaxed-None-SingleCell	Boncat_Soil	21hC_Boncat_plus	Microbial enrichment	Nextera XT	25	Relaxed	None	Single-cell	78097902	6276566	20338	195055	375	284	20338			0.612663	2	0	0	1
BYXGW	Relaxed-Dedup-SingleCell	Boncat_Soil	21hC_Boncat_plus	Microbial enrichment	Nextera XT	25	Relaxed	Read deduplication	Single-cell	97473645	9600830	72661	222279	420	294	20338			0.604181	2	0	0	1
BYXGW	Relaxed-Norm-SingleCell	Boncat_Soil	21hC_Boncat_plus	Microbial enrichment	Nextera XT	25	Relaxed	Read normalization	Single-cell	76073355	6194851	20218	190218	374	284	20218			0.615547	2	0	0	1
BYXGX	Strict-None-Meta	Boncat_Soil	4hA_Boncat_minus	Microbial enrichment	Nextera XT	25	Strict	None	Metagenome	73086544	3277330		191995	361	283	5439			0.66915	0	0	0	0
BYXGX	Strict-Dedup-Meta	Boncat_Soil	4hA_Boncat_minus	Microbial enrichment	Nextera XT	25	Strict	Read deduplication	Metagenome	72667501	5871862		171323	406	290	4446			0.67324	1	0	0	1
BYXGX	Strict-Norm-Meta	Boncat_Soil	4hA_Boncat_minus	Microbial enrichment	Nextera XT	25	Strict	Read normalization	Metagenome	76001472	3588700		200266	361	283	5176			0.669635	1	0	0	0
BYXGX	Strict-None-SingleCell	Boncat_Soil	4hA_Boncat_minus	Microbial enrichment	Nextera XT	25	Strict	None	Single-cell	74065758	6903908	11350	183563	377	284	11350			0.610217	1	0	0	1
BYXGX	Strict-Dedup-SingleCell	Boncat_Soil	4hA_Boncat_minus	Microbial enrichment	Nextera XT	25	Strict	Read deduplication	Single-cell	92048378	11842293	32585	202379	436	294	11971			0.588534	3	0	0	3
BYXGX	Strict-Norm-SingleCell	Boncat_Soil	4hA_Boncat_minus	Microbial enrichment	Nextera XT	25	Strict	Read normalization	Single-cell	73583293	6866830	11350	182485	377	284	11350			0.610398	1	0	0	1
BYXGX	Relaxed-None-Meta	Boncat_Soil	4hA_Boncat_minus	Microbial enrichment	Nextera XT	25	Relaxed	None	Metagenome	80650041	3923446		209495	365	284	5623			0.667043	1	0	0	0
BYXGX	Relaxed-Dedup-Meta	Boncat_Soil	4hA_Boncat_minus	Microbial enrichment	Nextera XT	25	Relaxed	Read deduplication	Metagenome	79683517	6283560		187268	408	291	5310			0.658767	1	0	0	1
BYXGX	Relaxed-Norm-Meta	Boncat_Soil	4hA_Boncat_minus	Microbial enrichment	Nextera XT	25	Relaxed	Read normalization	Metagenome	83229236	4476872		216016	367	283	4510			0.669393	1	0	0	1
BYXGX	Relaxed-None-SingleCell	Boncat_Soil	4hA_Boncat_minus	Microbial enrichment	Nextera XT	25	Relaxed	None	Single-cell	83464110	8630659	11238	202529	385	284	11238			0.603329	2	0	0	1
BYXGX	Relaxed-Dedup-SingleCell	Boncat_Soil	4hA_Boncat_minus	Microbial enrichment	Nextera XT	25	Relaxed	Read deduplication	Single-cell	103433640	13533166	44542	226255	437	296	12585			0.584254	3	0	0	2
BYXGX	Relaxed-Norm-SingleCell	Boncat_Soil	4hA_Boncat_minus	Microbial enrichment	Nextera XT	25	Relaxed	Read normalization	Single-cell	80948856	8503795	11238	196541	385	284	11238			0.601838	2	0	0	1
BYXGY	Strict-None-Meta	Boncat_Soil	4hA_Boncat_plus	Microbial enrichment	Nextera XT	25	Strict	None	Metagenome	20924430	456889		58919	333	282	2458			0.689286	0	0	0	0
BYXGY	Strict-Dedup-Meta	Boncat_Soil	4hA_Boncat_plus	Microbial enrichment	Nextera XT	25	Strict	Read deduplication	Metagenome	20499341	580824		54425	357	284	2363			0.703911	0	0	0	0
BYXGY	Strict-Norm-Meta	Boncat_Soil	4hA_Boncat_plus	Microbial enrichment	Nextera XT	25	Strict	Read normalization	Metagenome	20862875	460756		58730	333	282	2458			0.691489	0	0	0	0
BYXGY	Strict-None-SingleCell	Boncat_Soil	4hA_Boncat_plus	Microbial enrichment	Nextera XT	25	Strict	None	Single-cell	21168475	681834		58308	339	282	3126			0.673544	0	0	0	0
BYXGY	Strict-Dedup-SingleCell	Boncat_Soil	4hA_Boncat_plus	Microbial enrichment	Nextera XT	25	Strict	Read deduplication	Single-cell	27344002	1265969		68990	380	286	4540			0.693838	0	0	0	0
BYXGY	Strict-Norm-SingleCell	Boncat_Soil	4hA_Boncat_plus	Microbial enrichment	Nextera XT	25	Strict	Read normalization	Single-cell	21209811	694937		58312	340	282	3126			0.67574	0	0	0	0
BYXGY	Relaxed-None-Meta	Boncat_Soil	4hA_Boncat_plus	Microbial enrichment	Nextera XT	25	Relaxed	None	Metagenome	22243308	492201		62479	334	282	2371			0.681742	0	0	0	0
BYXGY	Relaxed-Dedup-Meta	Boncat_Soil	4hA_Boncat_plus	Microbial enrichment	Nextera XT	25	Relaxed	Read deduplication	Metagenome	20563694	583231		53949	362	286	2908			0.725517	0	0	0	0
BYXGY	Relaxed-Norm-Meta	Boncat_Soil	4hA_Boncat_plus	Microbial enrichment	Nextera XT	25	Relaxed	Read normalization	Metagenome	21938618	490948		61632	334	282	2371			0.682432	0	0	0	0
BYXGY	Relaxed-None-SingleCell	Boncat_Soil	4hA_Boncat_plus	Microbial enrichment	Nextera XT	25	Relaxed	None	Single-cell	23089302	781882		63104	342	282	3032			0.672976	0	0	0	0
BYXGY	Relaxed-Dedup-SingleCell	Boncat_Soil	4hA_Boncat_plus	Microbial enrichment	Nextera XT	25	Relaxed	Read deduplication	Single-cell	29407913	1275578		73866	380	288	4540			0.697749	0	0	0	0
BYXGY	Relaxed-Norm-SingleCell	Boncat_Soil	4hA_Boncat_plus	Microbial enrichment	Nextera XT	25	Relaxed	Read normalization	Single-cell	22670386	769660		62075	341	282	3032			0.669173	0	0	0	0
BYXGZ	Strict-None-Meta	Boncat_Soil	4hB_Boncat_minus	Microbial enrichment	Nextera XT	25	Strict	None	Metagenome	141029205	33823932	9163469	293573	440	285	110675			0.428571	8	1	2	1
BYXGZ	Strict-Dedup-Meta	Boncat_Soil	4hB_Boncat_minus	Microbial enrichment	Nextera XT	25	Strict	Read deduplication	Metagenome	138201979	41725763	9726656	244605	553	305	114967			0.462928	9	2	2	3
BYXGZ	Strict-Norm-Meta	Boncat_Soil	4hB_Boncat_minus	Microbial enrichment	Nextera XT	25	Strict	Read normalization	Metagenome	139803665	33736909	9129782	290687	441	285	110675			0.431668	8	1	2	1
BYXGZ	Strict-None-SingleCell	Boncat_Soil	4hB_Boncat_minus	Microbial enrichment	Nextera XT	25	Strict	None	Single-cell	139040510	41375632	11271398	266520	483	286	210014			0.416535	9	1	4	3
BYXGZ	Strict-Dedup-SingleCell	Boncat_Soil	4hB_Boncat_minus	Microbial enrichment	Nextera XT	25	Strict	Read deduplication	Single-cell	155661099	48931097	11704153	271884	550	305	234510			0.421079	11	1	6	2
BYXGZ	Strict-Norm-SingleCell	Boncat_Soil	4hB_Boncat_minus	Microbial enrichment	Nextera XT	25	Strict	Read normalization	Single-cell	138163630	41431496	11235078	264070	486	286	210014			0.423452	9	1	4	3
BYXGZ	Relaxed-None-Meta	Boncat_Soil	4hB_Boncat_minus	Microbial enrichment	Nextera XT	25	Relaxed	None	Metagenome	154859416	36675446	10656411	319016	443	286	166209			0.43109	8	2	1	2
BYXGZ	Relaxed-Dedup-Meta	Boncat_Soil	4hB_Boncat_minus	Microbial enrichment	Nextera XT	25	Relaxed	Read deduplication	Metagenome	160405449	46518766	12148423	287067	543	305	149336			0.465452	9	2	2	4
BYXGZ	Relaxed-Norm-Meta	Boncat_Soil	4hB_Boncat_minus	Microbial enrichment	Nextera XT	25	Relaxed	Read normalization	Metagenome	155318759	37619015	11250868	319134	449	286	110675			0.43608	8	2	1	2
BYXGZ	Relaxed-None-SingleCell	Boncat_Soil	4hB_Boncat_minus	Microbial enrichment	Nextera XT	25	Relaxed	None	Single-cell	158910898	46445640	13772325	302878	488	287	166209			0.417728	10	3	2	4
BYXGZ	Relaxed-Dedup-SingleCell	Boncat_Soil	4hB_Boncat_minus	Microbial enrichment	Nextera XT	25	Relaxed	Read deduplication	Single-cell	181386725	54561186	14600971	322026	538	305	249487			0.418081	11	2	4	3
BYXGZ	Relaxed-Norm-SingleCell	Boncat_Soil	4hB_Boncat_minus	Microbial enrichment	Nextera XT	25	Relaxed	Read normalization	Single-cell	152664191	46043375	13647998	288236	495	287	166201			0.413291	10	2	3	4
BYXHA	Strict-None-Meta	Boncat_Soil	4hB_Boncat_plus	Microbial enrichment	Nextera XT	25	Strict	None	Metagenome	31044432	1672933		80920	361	283	8004			0.678721	0	0	0	0
BYXHA	Strict-Dedup-Meta	Boncat_Soil	4hB_Boncat_plus	Microbial enrichment	Nextera XT	25	Strict	Read deduplication	Metagenome	29097131	2700454		68876	399	288	5995			0.667739	0	0	0	0
BYXHA	Strict-Norm-Meta	Boncat_Soil	4hB_Boncat_plus	Microbial enrichment	Nextera XT	25	Strict	Read normalization	Metagenome	30710979	1650722		80122	360	283	7468			0.680592	0	0	0	0
BYXHA	Strict-None-SingleCell	Boncat_Soil	4hB_Boncat_plus	Microbial enrichment	Nextera XT	25	Strict	None	Single-cell	31639681	3171429		78080	377	283	8122			0.638032	0	0	0	1
BYXHA	Strict-Dedup-SingleCell	Boncat_Soil	4hB_Boncat_plus	Microbial enrichment	Nextera XT	25	Strict	Read deduplication	Single-cell	36961496	5055282		82636	422	290	9855			0.611599	1	0	0	1
BYXHA	Strict-Norm-SingleCell	Boncat_Soil	4hB_Boncat_plus	Microbial enrichment	Nextera XT	25	Strict	Read normalization	Single-cell	31270837	3124561		77281	376	283	7492			0.641653	0	0	0	1
BYXHA	Relaxed-None-Meta	Boncat_Soil	4hB_Boncat_plus	Microbial enrichment	Nextera XT	25	Relaxed	None	Metagenome	33532710	1863671		86864	364	283	8004			0.677147	0	0	0	0
BYXHA	Relaxed-Dedup-Meta	Boncat_Soil	4hB_Boncat_plus	Microbial enrichment	Nextera XT	25	Relaxed	Read deduplication	Metagenome	30542078	2625131		72073	402	290	5036			0.682846	0	0	0	0
BYXHA	Relaxed-Norm-Meta	Boncat_Soil	4hB_Boncat_plus	Microbial enrichment	Nextera XT	25	Relaxed	Read normalization	Metagenome	32726768	1827157		84811	363	283	7468			0.6764	0	0	0	0
BYXHA	Relaxed-None-SingleCell	Boncat_Soil	4hB_Boncat_plus	Microbial enrichment	Nextera XT	25	Relaxed	None	Single-cell	34520214	3712922		84203	381	283	8122			0.628998	1	0	0	1
BYXHA	Relaxed-Dedup-SingleCell	Boncat_Soil	4hB_Boncat_plus	Microbial enrichment	Nextera XT	25	Relaxed	Read deduplication	Single-cell	40220994	5547302	21238	89566	422	292	11184			0.6032	1	0	0	1
BYXHA	Relaxed-Norm-SingleCell	Boncat_Soil	4hB_Boncat_plus	Microbial enrichment	Nextera XT	25	Relaxed	Read normalization	Single-cell	33505779	3629014		81843	380	283	7506			0.631312	1	0	0	1
BYXHB	Strict-None-Meta	Boncat_Soil	4hC_Boncat_minus	Microbial enrichment	Nextera XT	25	Strict	None	Metagenome	93953060	12209211	81916	218805	404	285	18139			0.614085	2	0	0	2
BYXHB	Strict-Dedup-Meta	Boncat_Soil	4hC_Boncat_minus	Microbial enrichment	Nextera XT	25	Strict	Read deduplication	Metagenome	102398136	18160871	120356	205970	494	304	18140			0.626622	2	0	0	2
BYXHB	Strict-Norm-Meta	Boncat_Soil	4hC_Boncat_minus	Microbial enrichment	Nextera XT	25	Strict	Read normalization	Metagenome	94563165	12324798	77936	220215	406	285	18140			0.6157	2	0	0	2
BYXHB	Strict-None-SingleCell	Boncat_Soil	4hC_Boncat_minus	Microbial enrichment	Nextera XT	25	Strict	None	Single-cell	98876334	17009215	202583	215804	438	286	18139			0.604897	3	0	1	2
BYXHB	Strict-Dedup-SingleCell	Boncat_Soil	4hC_Boncat_minus	Microbial enrichment	Nextera XT	25	Strict	Read deduplication	Single-cell	115619919	21881061	224508	231951	489	303	21569			0.607107	4	0	1	2
BYXHB	Strict-Norm-SingleCell	Boncat_Soil	4hC_Boncat_minus	Microbial enrichment	Nextera XT	25	Strict	Read normalization	Single-cell	96946652	16751898	213887	211693	437	286	18139			0.604592	3	0	1	2
BYXHB	Relaxed-None-Meta	Boncat_Soil	4hC_Boncat_minus	Microbial enrichment	Nextera XT	25	Relaxed	None	Metagenome	121990743	17349884	164146	276432	416	286	24620			0.597912	3	0	1	2
BYXHB	Relaxed-Dedup-Meta	Boncat_Soil	4hC_Boncat_minus	Microbial enrichment	Nextera XT	25	Relaxed	Read deduplication	Metagenome	138815603	26617226	325621	275395	500	304	18138			0.620124	4	0	1	3
BYXHB	Relaxed-Norm-Meta	Boncat_Soil	4hC_Boncat_minus	Microbial enrichment	Nextera XT	25	Relaxed	Read normalization	Metagenome	117923955	18126650	226116	263274	426	286	19686			0.600852	3	0	1	2
BYXHB	Relaxed-None-SingleCell	Boncat_Soil	4hC_Boncat_minus	Microbial enrichment	Nextera XT	25	Relaxed	None	Single-cell	131471840	25714481	504605	276230	457	288	24620			0.59128	5	0	0	4
BYXHB	Relaxed-Dedup-SingleCell	Boncat_Soil	4hC_Boncat_minus	Microbial enrichment	Nextera XT	25	Relaxed	Read deduplication	Single-cell	156341899	31926406	572550	309860	494	303	27869			0.597016	6	0	0	4
BYXHB	Relaxed-Norm-SingleCell	Boncat_Soil	4hC_Boncat_minus	Microbial enrichment	Nextera XT	25	Relaxed	Read normalization	Single-cell	120195338	24796948	509468	250219	464	287	24620			0.590762	5	0	0	4
BYXHC	Strict-None-Meta	Boncat_Soil	4hC_Boncat_plus	Microbial enrichment	Nextera XT	25	Strict	None	Metagenome	17199512	360313		48429	334	282	4327			0.704615	0	0	0	0
BYXHC	Strict-Dedup-Meta	Boncat_Soil	4hC_Boncat_plus	Microbial enrichment	Nextera XT	25	Strict	Read deduplication	Metagenome	16881805	402338		45002	357	284	3645			0.720207	0	0	0	0
BYXHC	Strict-Norm-Meta	Boncat_Soil	4hC_Boncat_plus	Microbial enrichment	Nextera XT	25	Strict	Read normalization	Metagenome	17160293	359568		48324	334	282	4327			0.703704	0	0	0	0
BYXHC	Strict-None-SingleCell	Boncat_Soil	4hC_Boncat_plus	Microbial enrichment	Nextera XT	25	Strict	None	Single-cell	17382929	462526		48031	339	282	4436			0.705882	0	0	0	0
BYXHC	Strict-Dedup-SingleCell	Boncat_Soil	4hC_Boncat_plus	Microbial enrichment	Nextera XT	25	Strict	Read deduplication	Single-cell	21681742	786864		55003	379	285	4327			0.745562	0	0	0	0
BYXHC	Strict-Norm-SingleCell	Boncat_Soil	4hC_Boncat_plus	Microbial enrichment	Nextera XT	25	Strict	Read normalization	Single-cell	17329545	460293		47900	339	282	4436			0.706161	0	0	0	0
BYXHC	Relaxed-None-Meta	Boncat_Soil	4hC_Boncat_plus	Microbial enrichment	Nextera XT	25	Relaxed	None	Metagenome	18197212	364149		51155	336	282	4327			0.691131	0	0	0	0
BYXHC	Relaxed-Dedup-Meta	Boncat_Soil	4hC_Boncat_plus	Microbial enrichment	Nextera XT	25	Relaxed	Read deduplication	Metagenome	16771452	381750		44151	363	286	3250			0.741477	0	0	0	0
BYXHC	Relaxed-Norm-Meta	Boncat_Soil	4hC_Boncat_plus	Microbial enrichment	Nextera XT	25	Relaxed	Read normalization	Metagenome	17968614	365377		50543	335	282	4327			0.695783	0	0	0	0
BYXHC	Relaxed-None-SingleCell	Boncat_Soil	4hC_Boncat_plus	Microbial enrichment	Nextera XT	25	Relaxed	None	Single-cell	18577152	488826		51192	340	282	4427			0.693157	0	0	0	0
BYXHC	Relaxed-Dedup-SingleCell	Boncat_Soil	4hC_Boncat_plus	Microbial enrichment	Nextera XT	25	Relaxed	Read deduplication	Single-cell	23154522	796332		58211	383	287	4237			0.748798	0	0	0	0
BYXHC	Relaxed-Norm-SingleCell	Boncat_Soil	4hC_Boncat_plus	Microbial enrichment	Nextera XT	25	Relaxed	Read normalization	Single-cell	18329826	492825		50492	340	282	4427			0.707424	0	0	0	0
BYXHT	Strict-None-Meta	SPOT_CSP2799	5SPOviralmetaG_FD	Virus fraction	Nextera XT	20	Strict	None	Metagenome	2812249	82765		8479	301	280	4012			0.409091
BYXHT	Strict-Dedup-Meta	SPOT_CSP2799	5SPOviralmetaG_FD	Virus fraction	Nextera XT	20	Strict	Read deduplication	Metagenome	2506387	78567		7442	310	281	4345			0.418605
BYXHT	Strict-Norm-Meta	SPOT_CSP2799	5SPOviralmetaG_FD	Virus fraction	Nextera XT	20	Strict	Read normalization	Metagenome	2283163	80318		6613	321	281	5309			0.45
BYXHT	Strict-None-SingleCell	SPOT_CSP2799	5SPOviralmetaG_FD	Virus fraction	Nextera XT	20	Strict	None	Single-cell	2865195	108490		8448	306	280	4219			0.474138
BYXHT	Strict-Dedup-SingleCell	SPOT_CSP2799	5SPOviralmetaG_FD	Virus fraction	Nextera XT	20	Strict	Read deduplication	Single-cell	2645532	112787		7735	313	281	4158			0.447154
BYXHT	Strict-Norm-SingleCell	SPOT_CSP2799	5SPOviralmetaG_FD	Virus fraction	Nextera XT	20	Strict	Read normalization	Single-cell	2257697	94995		6464	323	281	4012			0.441176
BYXHT	Relaxed-None-Meta	SPOT_CSP2799	5SPOviralmetaG_FD	Virus fraction	Nextera XT	20	Relaxed	None	Metagenome	2563280	77814		7512	318	281	3397			0.5
BYXHT	Relaxed-Dedup-Meta	SPOT_CSP2799	5SPOviralmetaG_FD	Virus fraction	Nextera XT	20	Relaxed	Read deduplication	Metagenome	2356655	55960		6904	320	281	3067			0.516667
BYXHT	Relaxed-Norm-Meta	SPOT_CSP2799	5SPOviralmetaG_FD	Virus fraction	Nextera XT	20	Relaxed	Read normalization	Metagenome	2340399	81099		6784	322	281	5309			0.458824
BYXHT	Relaxed-None-SingleCell	SPOT_CSP2799	5SPOviralmetaG_FD	Virus fraction	Nextera XT	20	Relaxed	None	Single-cell	2651138	117911		7567	323	282	7053			0.475806
BYXHT	Relaxed-Dedup-SingleCell	SPOT_CSP2799	5SPOviralmetaG_FD	Virus fraction	Nextera XT	20	Relaxed	Read deduplication	Single-cell	2589620	112353		7407	325	282	8316			0.459016
BYXHT	Relaxed-Norm-SingleCell	SPOT_CSP2799	5SPOviralmetaG_FD	Virus fraction	Nextera XT	20	Relaxed	Read normalization	Single-cell	2348366	101762		6697	325	281	4012			0.457944
BYXHU	Strict-None-Meta	SPOT_CSP2799	12SPOviralmetaG_FD	Virus fraction	Nextera XT	17	Strict	None	Metagenome	12763630	1179013		32873	361	282	6968			0.524086
BYXHU	Strict-Dedup-Meta	SPOT_CSP2799	12SPOviralmetaG_FD	Virus fraction	Nextera XT	17	Strict	Read deduplication	Metagenome	11992672	985884		31000	360	283	6423			0.53272
BYXHU	Strict-Norm-Meta	SPOT_CSP2799	12SPOviralmetaG_FD	Virus fraction	Nextera XT	17	Strict	Read normalization	Metagenome	12468366	1066934		32167	361	283	6353			0.545455
BYXHU	Strict-None-SingleCell	SPOT_CSP2799	12SPOviralmetaG_FD	Virus fraction	Nextera XT	17	Strict	None	Single-cell	12958192	1483672	22284	32274	371	283	11507			0.515345
BYXHU	Strict-Dedup-SingleCell	SPOT_CSP2799	12SPOviralmetaG_FD	Virus fraction	Nextera XT	17	Strict	Read deduplication	Single-cell	12957215	1504779	33998	32581	370	282	11796			0.508259
BYXHU	Strict-Norm-SingleCell	SPOT_CSP2799	12SPOviralmetaG_FD	Virus fraction	Nextera XT	17	Strict	Read normalization	Single-cell	12411358	1335704		31031	370	283	9644			0.523121
BYXHU	Relaxed-None-Meta	SPOT_CSP2799	12SPOviralmetaG_FD	Virus fraction	Nextera XT	17	Relaxed	None	Metagenome	13998842	1082011		36676	359	283	6113			0.5433
BYXHU	Relaxed-Dedup-Meta	SPOT_CSP2799	12SPOviralmetaG_FD	Virus fraction	Nextera XT	17	Relaxed	Read deduplication	Metagenome	12685408	854072		33313	359	283	5636			0.552511
BYXHU	Relaxed-Norm-Meta	SPOT_CSP2799	12SPOviralmetaG_FD	Virus fraction	Nextera XT	17	Relaxed	Read normalization	Metagenome	13220666	1037086		34549	360	283	7119			0.549533
BYXHU	Relaxed-None-SingleCell	SPOT_CSP2799	12SPOviralmetaG_FD	Virus fraction	Nextera XT	17	Relaxed	None	Single-cell	14360209	1509991		35987	371	283	9644			0.491941
BYXHU	Relaxed-Dedup-SingleCell	SPOT_CSP2799	12SPOviralmetaG_FD	Virus fraction	Nextera XT	17	Relaxed	Read deduplication	Single-cell	14286013	1520479	10801	35946	374	283	10801			0.499373
BYXHU	Relaxed-Norm-SingleCell	SPOT_CSP2799	12SPOviralmetaG_FD	Virus fraction	Nextera XT	17	Relaxed	Read normalization	Single-cell	13339347	1403641		33471	370	283	7119			0.514089
BYXHX	Strict-None-Meta	SPOT_CSP2799	28SPOviralmetaG_FD	Virus fraction	Nextera XT	17	Strict	None	Metagenome	6589618	217290		18539	334	282	3888			0.515385
BYXHX	Strict-Dedup-Meta	SPOT_CSP2799	28SPOviralmetaG_FD	Virus fraction	Nextera XT	17	Strict	Read deduplication	Metagenome	5452513	138066		15438	335	282	2655			0.525714
BYXHX	Strict-Norm-Meta	SPOT_CSP2799	28SPOviralmetaG_FD	Virus fraction	Nextera XT	17	Strict	Read normalization	Metagenome	6252338	172453		17361	342	282	3170			0.557214
BYXHX	Strict-None-SingleCell	SPOT_CSP2799	28SPOviralmetaG_FD	Virus fraction	Nextera XT	17	Strict	None	Single-cell	6675937	284330		18268	340	282	7082			0.528529
BYXHX	Strict-Dedup-SingleCell	SPOT_CSP2799	28SPOviralmetaG_FD	Virus fraction	Nextera XT	17	Strict	Read deduplication	Single-cell	6278308	286964		17080	344	282	7609			0.508824
BYXHX	Strict-Norm-SingleCell	SPOT_CSP2799	28SPOviralmetaG_FD	Virus fraction	Nextera XT	17	Strict	Read normalization	Single-cell	6117133	244646		16580	347	283	3936			0.52669
BYXHX	Relaxed-None-Meta	SPOT_CSP2799	28SPOviralmetaG_FD	Virus fraction	Nextera XT	17	Relaxed	None	Metagenome	6788556	189752		18869	342	283	4088			0.582222
BYXHX	Relaxed-Dedup-Meta	SPOT_CSP2799	28SPOviralmetaG_FD	Virus fraction	Nextera XT	17	Relaxed	Read deduplication	Metagenome	6271200	121018		17588	340	283	4045			0.569444
BYXHX	Relaxed-Norm-Meta	SPOT_CSP2799	28SPOviralmetaG_FD	Virus fraction	Nextera XT	17	Relaxed	Read normalization	Metagenome	6513192	188474		18032	343	283	4088			0.532407
BYXHX	Relaxed-None-SingleCell	SPOT_CSP2799	28SPOviralmetaG_FD	Virus fraction	Nextera XT	17	Relaxed	None	Single-cell	6918954	275667		18620	350	283	7648			0.509146
BYXHX	Relaxed-Dedup-SingleCell	SPOT_CSP2799	28SPOviralmetaG_FD	Virus fraction	Nextera XT	17	Relaxed	Read deduplication	Single-cell	6841203	284069		18373	353	283	6494			0.531977
BYXHX	Relaxed-Norm-SingleCell	SPOT_CSP2799	28SPOviralmetaG_FD	Virus fraction	Nextera XT	17	Relaxed	Read normalization	Single-cell	6429724	247525		17371	349	283	4713			0.521127
BYXHY	Strict-None-Meta	SPOT_CSP2799	29SPOviralmetaG_FD	Virus fraction	Nextera XT	20	Strict	None	Metagenome	8434447	324675		23388	337	282	5763			0.513353
BYXHY	Strict-Dedup-Meta	SPOT_CSP2799	29SPOviralmetaG_FD	Virus fraction	Nextera XT	20	Strict	Read deduplication	Metagenome	7864876	299415		21803	337	282	5645			0.488818
BYXHY	Strict-Norm-Meta	SPOT_CSP2799	29SPOviralmetaG_FD	Virus fraction	Nextera XT	20	Strict	Read normalization	Metagenome	8197927	307066		22518	342	282	5716			0.485531
BYXHY	Strict-None-SingleCell	SPOT_CSP2799	29SPOviralmetaG_FD	Virus fraction	Nextera XT	20	Strict	None	Single-cell	8693014	448307		23558	341	282	8356			0.486653
BYXHY	Strict-Dedup-SingleCell	SPOT_CSP2799	29SPOviralmetaG_FD	Virus fraction	Nextera XT	20	Strict	Read deduplication	Single-cell	8543627	467344		22995	346	282	8422			0.496032
BYXHY	Strict-Norm-SingleCell	SPOT_CSP2799	29SPOviralmetaG_FD	Virus fraction	Nextera XT	20	Strict	Read normalization	Single-cell	8071197	417150		21735	346	282	8356			0.508889
BYXHY	Relaxed-None-Meta	SPOT_CSP2799	29SPOviralmetaG_FD	Virus fraction	Nextera XT	20	Relaxed	None	Metagenome	8950153	304231		24732	340	282	4751			0.490566
BYXHY	Relaxed-Dedup-Meta	SPOT_CSP2799	29SPOviralmetaG_FD	Virus fraction	Nextera XT	20	Relaxed	Read deduplication	Metagenome	8211531	247937		22661	343	283	4219			0.522901
BYXHY	Relaxed-Norm-Meta	SPOT_CSP2799	29SPOviralmetaG_FD	Virus fraction	Nextera XT	20	Relaxed	Read normalization	Metagenome	8593719	298779		23682	342	282	5626			0.47557
BYXHY	Relaxed-None-SingleCell	SPOT_CSP2799	29SPOviralmetaG_FD	Virus fraction	Nextera XT	20	Relaxed	None	Single-cell	9183785	465320		24572	349	283	8578			0.474104
BYXHY	Relaxed-Dedup-SingleCell	SPOT_CSP2799	29SPOviralmetaG_FD	Virus fraction	Nextera XT	20	Relaxed	Read deduplication	Single-cell	9252869	482601		24535	355	283	8692			0.496169
BYXHY	Relaxed-Norm-SingleCell	SPOT_CSP2799	29SPOviralmetaG_FD	Virus fraction	Nextera XT	20	Relaxed	Read normalization	Single-cell	8583502	437353		23033	348	283	6567			0.483801
BYXHZ	Strict-None-Meta	SPOT_CSP2799	30SPOviralmetaG_FD	Virus fraction	Nextera XT	20	Strict	None	Metagenome	3783688	92485		11303	304	280	3297			0.612069
BYXHZ	Strict-Dedup-Meta	SPOT_CSP2799	30SPOviralmetaG_FD	Virus fraction	Nextera XT	20	Strict	Read deduplication	Metagenome	3614449	80329		10795	306	280	3297			0.553398
BYXHZ	Strict-Norm-Meta	SPOT_CSP2799	30SPOviralmetaG_FD	Virus fraction	Nextera XT	20	Strict	Read normalization	Metagenome	3062824	72846		8715	329	281	3681			0.621053
BYXHZ	Strict-None-SingleCell	SPOT_CSP2799	30SPOviralmetaG_FD	Virus fraction	Nextera XT	20	Strict	None	Single-cell	3963928	136945		11534	308	281	3681			0.607143
BYXHZ	Strict-Dedup-SingleCell	SPOT_CSP2799	30SPOviralmetaG_FD	Virus fraction	Nextera XT	20	Strict	Read deduplication	Single-cell	3928976	144173		11700	307	280	3681			0.632768
BYXHZ	Strict-Norm-SingleCell	SPOT_CSP2799	30SPOviralmetaG_FD	Virus fraction	Nextera XT	20	Strict	Read normalization	Single-cell	3003442	103806		8395	331	282	3681			0.604651
BYXHZ	Relaxed-None-Meta	SPOT_CSP2799	30SPOviralmetaG_FD	Virus fraction	Nextera XT	20	Relaxed	None	Metagenome	3389184	74267		9825	323	282	2369			0.587629
BYXHZ	Relaxed-Dedup-Meta	SPOT_CSP2799	30SPOviralmetaG_FD	Virus fraction	Nextera XT	20	Relaxed	Read deduplication	Metagenome	3136742	49438		9094	324	282	2207			0.540984
BYXHZ	Relaxed-Norm-Meta	SPOT_CSP2799	30SPOviralmetaG_FD	Virus fraction	Nextera XT	20	Relaxed	Read normalization	Metagenome	3104859	73224		8849	330	282	3160			0.590909
BYXHZ	Relaxed-None-SingleCell	SPOT_CSP2799	30SPOviralmetaG_FD	Virus fraction	Nextera XT	20	Relaxed	None	Single-cell	3528932	136715		9858	331	282	3248			0.6
BYXHZ	Relaxed-Dedup-SingleCell	SPOT_CSP2799	30SPOviralmetaG_FD	Virus fraction	Nextera XT	20	Relaxed	Read deduplication	Single-cell	3488340	132017		9945	329	281	3434			0.59375
BYXHZ	Relaxed-Norm-SingleCell	SPOT_CSP2799	30SPOviralmetaG_FD	Virus fraction	Nextera XT	20	Relaxed	Read normalization	Single-cell	3087905	109216		8620	333	282	3378			0.577778
BYXNA	Strict-None-Meta	SPOT_CSP2799	35SPOviralmetaG_FD	Virus fraction	Nextera XT	20	Strict	None	Metagenome	6836487	848817		16662	379	284	7967			0.538854
BYXNA	Strict-Dedup-Meta	SPOT_CSP2799	35SPOviralmetaG_FD	Virus fraction	Nextera XT	20	Strict	Read deduplication	Metagenome	6544473	773730		15997	379	284	8791			0.570629
BYXNA	Strict-Norm-Meta	SPOT_CSP2799	35SPOviralmetaG_FD	Virus fraction	Nextera XT	20	Strict	Read normalization	Metagenome	6608438	797631		15817	388	285	9180			0.567901
BYXNA	Strict-None-SingleCell	SPOT_CSP2799	35SPOviralmetaG_FD	Virus fraction	Nextera XT	20	Strict	None	Single-cell	6976156	1021796	32401	16320	394	284	18893			0.498943
BYXNA	Strict-Dedup-SingleCell	SPOT_CSP2799	35SPOviralmetaG_FD	Virus fraction	Nextera XT	20	Strict	Read deduplication	Single-cell	6806208	1035957	45703	15796	398	285	18894			0.504175
BYXNA	Strict-Norm-SingleCell	SPOT_CSP2799	35SPOviralmetaG_FD	Virus fraction	Nextera XT	20	Strict	Read normalization	Single-cell	6496023	904481	49018	15095	397	285	24430			0.506143
BYXNA	Relaxed-None-Meta	SPOT_CSP2799	35SPOviralmetaG_FD	Virus fraction	Nextera XT	20	Relaxed	None	Metagenome	7071606	760690		17315	381	285	7624			0.55814
BYXNA	Relaxed-Dedup-Meta	SPOT_CSP2799	35SPOviralmetaG_FD	Virus fraction	Nextera XT	20	Relaxed	Read deduplication	Metagenome	6654202	594892		16463	378	285	4914			0.583942
BYXNA	Relaxed-Norm-Meta	SPOT_CSP2799	35SPOviralmetaG_FD	Virus fraction	Nextera XT	20	Relaxed	Read normalization	Metagenome	6806746	819425		16359	387	285	9607			0.549072
BYXNA	Relaxed-None-SingleCell	SPOT_CSP2799	35SPOviralmetaG_FD	Virus fraction	Nextera XT	20	Relaxed	None	Single-cell	7193304	1051582	58089	16687	399	286	13508			0.495893
BYXNA	Relaxed-Dedup-SingleCell	SPOT_CSP2799	35SPOviralmetaG_FD	Virus fraction	Nextera XT	20	Relaxed	Read deduplication	Single-cell	7127234	1029011	38487	16552	400	286	16258			0.484177
BYXNA	Relaxed-Norm-SingleCell	SPOT_CSP2799	35SPOviralmetaG_FD	Virus fraction	Nextera XT	20	Relaxed	Read normalization	Single-cell	6759261	982643	15811	15674	398	286	15811			0.498911
BYXNB	Strict-None-Meta	SPOT_CSP2799	37SPOviralmetaG_FD	Virus fraction	Nextera XT	20	Strict	None	Metagenome	27723265	4005348	261483	63920	403	286	61807			0.487693
BYXNB	Strict-Dedup-Meta	SPOT_CSP2799	37SPOviralmetaG_FD	Virus fraction	Nextera XT	20	Strict	Read deduplication	Metagenome	26060315	3524234	299810	59719	407	288	38252			0.493396
BYXNB	Strict-Norm-Meta	SPOT_CSP2799	37SPOviralmetaG_FD	Virus fraction	Nextera XT	20	Strict	Read normalization	Metagenome	27677844	3792667	225729	64139	403	286	61807			0.489837
BYXNB	Strict-None-SingleCell	SPOT_CSP2799	37SPOviralmetaG_FD	Virus fraction	Nextera XT	20	Strict	None	Single-cell	28238625	5271946	452239	61172	432	287	61867			0.468232
BYXNB	Strict-Dedup-SingleCell	SPOT_CSP2799	37SPOviralmetaG_FD	Virus fraction	Nextera XT	20	Strict	Read deduplication	Single-cell	28951730	5707937	478725	61369	446	288	61867			0.468987
BYXNB	Strict-Norm-SingleCell	SPOT_CSP2799	37SPOviralmetaG_FD	Virus fraction	Nextera XT	20	Strict	Read normalization	Single-cell	27885683	4981300	357434	60884	429	287	61867			0.475612
BYXNB	Relaxed-None-Meta	SPOT_CSP2799	37SPOviralmetaG_FD	Virus fraction	Nextera XT	20	Relaxed	None	Metagenome	30085162	4076528	274708	69950	401	286	37907			0.502148
BYXNB	Relaxed-Dedup-Meta	SPOT_CSP2799	37SPOviralmetaG_FD	Virus fraction	Nextera XT	20	Relaxed	Read deduplication	Metagenome	28477796	3541555	205615	65602	406	289	61864			0.49905
BYXNB	Relaxed-Norm-Meta	SPOT_CSP2799	37SPOviralmetaG_FD	Virus fraction	Nextera XT	20	Relaxed	Read normalization	Metagenome	29535811	3978371	224046	68663	402	286	61867			0.491698
BYXNB	Relaxed-None-SingleCell	SPOT_CSP2799	37SPOviralmetaG_FD	Virus fraction	Nextera XT	20	Relaxed	None	Single-cell	31043616	5672466	480421	67253	433	287	61867			0.469107
BYXNB	Relaxed-Dedup-SingleCell	SPOT_CSP2799	37SPOviralmetaG_FD	Virus fraction	Nextera XT	20	Relaxed	Read deduplication	Single-cell	32467009	6116514	488259	68576	449	290	61867			0.463293
BYXNB	Relaxed-Norm-SingleCell	SPOT_CSP2799	37SPOviralmetaG_FD	Virus fraction	Nextera XT	20	Relaxed	Read normalization	Single-cell	30046084	5364705	402423	65411	431	287	61867			0.479041
BYXNC	Strict-None-Meta	SPOT_CSP2799	43SPOviralmetaG_FD	Virus fraction	Nextera XT	20	Strict	None	Metagenome	1672012			5632	286	279	972			NA
BYXNC	Strict-Dedup-Meta	SPOT_CSP2799	43SPOviralmetaG_FD	Virus fraction	Nextera XT	20	Strict	Read deduplication	Metagenome	1343197			4497	287	279	972			NA
BYXNC	Strict-Norm-Meta	SPOT_CSP2799	43SPOviralmetaG_FD	Virus fraction	Nextera XT	20	Strict	Read normalization	Metagenome	856386			2713	294	280	795			NA
BYXNC	Strict-None-SingleCell	SPOT_CSP2799	43SPOviralmetaG_FD	Virus fraction	Nextera XT	20	Strict	None	Single-cell	1692394			5578	287	280	795			NA
BYXNC	Strict-Dedup-SingleCell	SPOT_CSP2799	43SPOviralmetaG_FD	Virus fraction	Nextera XT	20	Strict	Read deduplication	Single-cell	1379806			4544	288	280	795			NA
BYXNC	Strict-Norm-SingleCell	SPOT_CSP2799	43SPOviralmetaG_FD	Virus fraction	Nextera XT	20	Strict	Read normalization	Single-cell	835233			2645	293	280	795			NA
BYXNC	Relaxed-None-Meta	SPOT_CSP2799	43SPOviralmetaG_FD	Virus fraction	Nextera XT	20	Relaxed	None	Metagenome	1032773			3282	292	280	890			NA
BYXNC	Relaxed-Dedup-Meta	SPOT_CSP2799	43SPOviralmetaG_FD	Virus fraction	Nextera XT	20	Relaxed	Read deduplication	Metagenome	955364			3031	294	280	793			NA
BYXNC	Relaxed-Norm-Meta	SPOT_CSP2799	43SPOviralmetaG_FD	Virus fraction	Nextera XT	20	Relaxed	Read normalization	Metagenome	871253			2756	296	280	795			NA
BYXNC	Relaxed-None-SingleCell	SPOT_CSP2799	43SPOviralmetaG_FD	Virus fraction	Nextera XT	20	Relaxed	None	Single-cell	1076558	1047		3363	295	280	1047			NA
BYXNC	Relaxed-Dedup-SingleCell	SPOT_CSP2799	43SPOviralmetaG_FD	Virus fraction	Nextera XT	20	Relaxed	Read deduplication	Single-cell	1053990			3372	295	280	890			NA
BYXNC	Relaxed-Norm-SingleCell	SPOT_CSP2799	43SPOviralmetaG_FD	Virus fraction	Nextera XT	20	Relaxed	Read normalization	Single-cell	860640			2713	296	280	795			NA
BYXNG	Strict-None-Meta	SPOT_CSP2799	46SPOviralmetaG_FD	Virus fraction	Nextera XT	20	Strict	None	Metagenome	1229500			3996	289	279	978			NA
BYXNG	Strict-Dedup-Meta	SPOT_CSP2799	46SPOviralmetaG_FD	Virus fraction	Nextera XT	20	Strict	Read deduplication	Metagenome	1158568			3764	290	279	973			NA
BYXNG	Strict-Norm-Meta	SPOT_CSP2799	46SPOviralmetaG_FD	Virus fraction	Nextera XT	20	Strict	Read normalization	Metagenome	936556			2941	300	280	986			NA
BYXNG	Strict-None-SingleCell	SPOT_CSP2799	46SPOviralmetaG_FD	Virus fraction	Nextera XT	20	Strict	None	Single-cell	1216269	1093		3818	291	280	1093			1
BYXNG	Strict-Dedup-SingleCell	SPOT_CSP2799	46SPOviralmetaG_FD	Virus fraction	Nextera XT	20	Strict	Read deduplication	Single-cell	1183324	1465		3769	291	280	1465			1
BYXNG	Strict-Norm-SingleCell	SPOT_CSP2799	46SPOviralmetaG_FD	Virus fraction	Nextera XT	20	Strict	Read normalization	Single-cell	922806			2875	300	280	979			NA
BYXNG	Relaxed-None-Meta	SPOT_CSP2799	46SPOviralmetaG_FD	Virus fraction	Nextera XT	20	Relaxed	None	Metagenome	1123581			3543	298	280	997			NA
BYXNG	Relaxed-Dedup-Meta	SPOT_CSP2799	46SPOviralmetaG_FD	Virus fraction	Nextera XT	20	Relaxed	Read deduplication	Metagenome	1025458			3225	300	281	997			NA
BYXNG	Relaxed-Norm-Meta	SPOT_CSP2799	46SPOviralmetaG_FD	Virus fraction	Nextera XT	20	Relaxed	Read normalization	Metagenome	970833			3044	301	280	963			NA
BYXNG	Relaxed-None-SingleCell	SPOT_CSP2799	46SPOviralmetaG_FD	Virus fraction	Nextera XT	20	Relaxed	None	Single-cell	1158404	2505		3573	301	281	1388			1
BYXNG	Relaxed-Dedup-SingleCell	SPOT_CSP2799	46SPOviralmetaG_FD	Virus fraction	Nextera XT	20	Relaxed	Read deduplication	Single-cell	1138998	1117		3576	302	280	1117			1
BYXNG	Relaxed-Norm-SingleCell	SPOT_CSP2799	46SPOviralmetaG_FD	Virus fraction	Nextera XT	20	Relaxed	Read normalization	Single-cell	959290	1048		2986	300	280	1048			1
BYXNH	Strict-None-Meta	SPOT_CSP2799	49SPOviralmetaG_FD	Virus fraction	Nextera XT	17	Strict	None	Metagenome	11242523	569291		30228	349	282	4595			0.559375
BYXNH	Strict-Dedup-Meta	SPOT_CSP2799	49SPOviralmetaG_FD	Virus fraction	Nextera XT	17	Strict	Read deduplication	Metagenome	10291747	493519		27584	350	283	5593			0.570642
BYXNH	Strict-Norm-Meta	SPOT_CSP2799	49SPOviralmetaG_FD	Virus fraction	Nextera XT	17	Strict	Read normalization	Metagenome	10990432	523184		29623	349	283	6338			0.556314
BYXNH	Strict-None-SingleCell	SPOT_CSP2799	49SPOviralmetaG_FD	Virus fraction	Nextera XT	17	Strict	None	Single-cell	11527816	760993		30292	353	283	6338			0.552723
BYXNH	Strict-Dedup-SingleCell	SPOT_CSP2799	49SPOviralmetaG_FD	Virus fraction	Nextera XT	17	Strict	Read deduplication	Single-cell	11190307	787647		29097	359	283	9459			0.552573
BYXNH	Strict-Norm-SingleCell	SPOT_CSP2799	49SPOviralmetaG_FD	Virus fraction	Nextera XT	17	Strict	Read normalization	Single-cell	10841187	673659		28461	355	283	6338			0.545103
BYXNH	Relaxed-None-Meta	SPOT_CSP2799	49SPOviralmetaG_FD	Virus fraction	Nextera XT	17	Relaxed	None	Metagenome	11926362	514352		32342	348	283	5388			0.535009
BYXNH	Relaxed-Dedup-Meta	SPOT_CSP2799	49SPOviralmetaG_FD	Virus fraction	Nextera XT	17	Relaxed	Read deduplication	Metagenome	11022005	401384		29953	348	283	4972			0.570175
BYXNH	Relaxed-Norm-Meta	SPOT_CSP2799	49SPOviralmetaG_FD	Virus fraction	Nextera XT	17	Relaxed	Read normalization	Metagenome	11393251	478800		30869	349	283	6764			0.550285
BYXNH	Relaxed-None-SingleCell	SPOT_CSP2799	49SPOviralmetaG_FD	Virus fraction	Nextera XT	17	Relaxed	None	Single-cell	12174856	777077		31739	358	283	8507			0.533947
BYXNH	Relaxed-Dedup-SingleCell	SPOT_CSP2799	49SPOviralmetaG_FD	Virus fraction	Nextera XT	17	Relaxed	Read deduplication	Single-cell	12194021	765156		31728	361	283	6152			0.550708
BYXNH	Relaxed-Norm-SingleCell	SPOT_CSP2799	49SPOviralmetaG_FD	Virus fraction	Nextera XT	17	Relaxed	Read normalization	Single-cell	11360600	678370		29787	357	283	6764			0.543677
BYXNN	Strict-None-Meta	SPOT_CSP2799	56SPOviralmetaG_FD	Virus fraction	Nextera XT	12	Strict	None	Metagenome	477529909	202650489	39421083	733983	763	298	423020			0.379582
BYXNN	Strict-Dedup-Meta	SPOT_CSP2799	56SPOviralmetaG_FD	Virus fraction	Nextera XT	12	Strict	Read deduplication	Metagenome	435181144	204153856	41378140	604829	897	318	472021			0.375884
BYXNN	Strict-Norm-Meta	SPOT_CSP2799	56SPOviralmetaG_FD	Virus fraction	Nextera XT	12	Strict	Read normalization	Metagenome	468921960	201926425	38188568	713297	780	298	423020			0.378836
BYXNN	Strict-None-SingleCell	SPOT_CSP2799	56SPOviralmetaG_FD	Virus fraction	Nextera XT	12	Strict	None	Single-cell	506716383	242757401	51735878	707745	923	305	474350			0.360974
BYXNN	Strict-Dedup-SingleCell	SPOT_CSP2799	56SPOviralmetaG_FD	Virus fraction	Nextera XT	12	Strict	Read deduplication	Single-cell	478500575	244032981	54281564	614130	1038	329	472246			0.366185
BYXNN	Strict-Norm-SingleCell	SPOT_CSP2799	56SPOviralmetaG_FD	Virus fraction	Nextera XT	12	Strict	Read normalization	Single-cell	493025720	240148331	51920573	676490	952	306	474350			0.354634
BYXNN	Relaxed-None-Meta	SPOT_CSP2799	56SPOviralmetaG_FD	Virus fraction	Nextera XT	12	Relaxed	None	Metagenome	657908763	256436003	50409009	1058013	685	301	577464			0.387081
BYXNN	Relaxed-Dedup-Meta	SPOT_CSP2799	56SPOviralmetaG_FD	Virus fraction	Nextera XT	12	Relaxed	Read deduplication	Metagenome	618324005	258863330	51518154	936941	759	311	577464			0.385473
BYXNN	Relaxed-Norm-Meta	SPOT_CSP2799	56SPOviralmetaG_FD	Virus fraction	Nextera XT	12	Relaxed	Read normalization	Metagenome	612397791	252847879	49006335	948326	741	302	577464			0.390361
BYXNN	Relaxed-None-SingleCell	SPOT_CSP2799	56SPOviralmetaG_FD	Virus fraction	Nextera XT	12	Relaxed	None	Single-cell	725820198	317458834	67291485	1073869	799	308	475447			0.380725
BYXNN	Relaxed-Dedup-SingleCell	SPOT_CSP2799	56SPOviralmetaG_FD	Virus fraction	Nextera XT	12	Relaxed	Read deduplication	Single-cell	708290434	318072953	71127391	1007712	834	319	722808			0.37071
BYXNN	Relaxed-Norm-SingleCell	SPOT_CSP2799	56SPOviralmetaG_FD	Virus fraction	Nextera XT	12	Relaxed	Read normalization	Single-cell	655313334	308663561	67455628	914679	899	310	475447			0.368349
CCUWB	Strict-None-Meta	Freshwater_lake_enrichment	Mendota Sort1 531vFSC P1	Microbial enrichment	Nextera XT	14	Strict	None	Metagenome	71033997	15981840	369896	141577	501	289	43070			0.624558	4	0	0	3
CCUWB	Strict-Dedup-Meta	Freshwater_lake_enrichment	Mendota Sort1 531vFSC P1	Microbial enrichment	Nextera XT	14	Strict	Read deduplication	Metagenome	67054417	20125098	345150	116508	613	312	43070			0.611893	6	0	0	4
CCUWB	Strict-Norm-Meta	Freshwater_lake_enrichment	Mendota Sort1 531vFSC P1	Microbial enrichment	Nextera XT	14	Strict	Read normalization	Metagenome	69862358	15724797	366527	139306	501	289	43070			0.625136	6	0	0	3
CCUWB	Strict-None-SingleCell	Freshwater_lake_enrichment	Mendota Sort1 531vFSC P1	Microbial enrichment	Nextera XT	14	Strict	None	Single-cell	70196016	21717968	844323	126089	582	290	43070			0.577453	7	0	1	5
CCUWB	Strict-Dedup-SingleCell	Freshwater_lake_enrichment	Mendota Sort1 531vFSC P1	Microbial enrichment	Nextera XT	14	Strict	Read deduplication	Single-cell	70169548	27798727	1540770	107764	734	320	47684			0.550415	7	0	2	6
CCUWB	Strict-Norm-SingleCell	Freshwater_lake_enrichment	Mendota Sort1 531vFSC P1	Microbial enrichment	Nextera XT	14	Strict	Read normalization	Single-cell	69388584	21573261	813089	124247	586	290	43070			0.576847	5	0	1	4
CCUWB	Relaxed-None-Meta	Freshwater_lake_enrichment	Mendota Sort1 531vFSC P1	Microbial enrichment	Nextera XT	14	Relaxed	None	Metagenome	76022735	18052018	383253	148800	514	290	43070			0.616626	5	0	0	5
CCUWB	Relaxed-Dedup-Meta	Freshwater_lake_enrichment	Mendota Sort1 531vFSC P1	Microbial enrichment	Nextera XT	14	Relaxed	Read deduplication	Metagenome	71637400	22001264	398824	122822	625	314	43070			0.606739	6	0	0	5
CCUWB	Relaxed-Norm-Meta	Freshwater_lake_enrichment	Mendota Sort1 531vFSC P1	Microbial enrichment	Nextera XT	14	Relaxed	Read normalization	Metagenome	73945360	17701913	376849	144505	516	290	43070			0.612685	6	0	0	5
CCUWB	Relaxed-None-SingleCell	Freshwater_lake_enrichment	Mendota Sort1 531vFSC P1	Microbial enrichment	Nextera XT	14	Relaxed	None	Single-cell	75257248	24483628	1192146	132050	603	292	43070			0.55846	9	0	1	5
CCUWB	Relaxed-Dedup-SingleCell	Freshwater_lake_enrichment	Mendota Sort1 531vFSC P1	Microbial enrichment	Nextera XT	14	Relaxed	Read deduplication	Single-cell	75577893	30858020	2398327	113912	755	322	51936			0.529506	10	0	2	3
CCUWB	Relaxed-Norm-SingleCell	Freshwater_lake_enrichment	Mendota Sort1 531vFSC P1	Microbial enrichment	Nextera XT	14	Relaxed	Read normalization	Single-cell	72954963	23903040	1152458	127749	606	291	43070			0.564243	7	0	1	5
CCUWC	Strict-None-Meta	Freshwater_lake_enrichment	Mendota Sort1 531vFSC P2	Microbial enrichment	Nextera XT	14	Strict	None	Metagenome	118530640	13632391	294166	269008	425	287	37824			0.67404	3	0	0	1
CCUWC	Strict-Dedup-Meta	Freshwater_lake_enrichment	Mendota Sort1 531vFSC P2	Microbial enrichment	Nextera XT	14	Strict	Read deduplication	Metagenome	110041129	20176757	302566	221111	494	303	37736			0.661614	6	0	0	4
CCUWC	Strict-Norm-Meta	Freshwater_lake_enrichment	Mendota Sort1 531vFSC P2	Microbial enrichment	Nextera XT	14	Strict	Read normalization	Metagenome	116479786	13382252	284122	264588	425	287	37824			0.674295	3	0	0	1
CCUWC	Strict-None-SingleCell	Freshwater_lake_enrichment	Mendota Sort1 531vFSC P2	Microbial enrichment	Nextera XT	14	Strict	None	Single-cell	119155930	21101864	345232	251154	463	288	37723			0.646864	4	0	0	4
CCUWC	Strict-Dedup-SingleCell	Freshwater_lake_enrichment	Mendota Sort1 531vFSC P2	Microbial enrichment	Nextera XT	14	Strict	Read deduplication	Single-cell	121469728	31203050	478759	223872	546	309	40982			0.608766	10	0	0	8
CCUWC	Strict-Norm-SingleCell	Freshwater_lake_enrichment	Mendota Sort1 531vFSC P2	Microbial enrichment	Nextera XT	14	Strict	Read normalization	Single-cell	116864231	20552844	348810	246841	461	287	37723			0.646613	4	0	0	4
CCUWC	Relaxed-None-Meta	Freshwater_lake_enrichment	Mendota Sort1 531vFSC P2	Microbial enrichment	Nextera XT	14	Relaxed	None	Metagenome	132653221	16975757	352789	294890	436	288	38016			0.664826	3	0	0	2
CCUWC	Relaxed-Dedup-Meta	Freshwater_lake_enrichment	Mendota Sort1 531vFSC P2	Microbial enrichment	Nextera XT	14	Relaxed	Read deduplication	Metagenome	124223524	23301697	322949	247709	499	304	38324			0.652797	8	0	0	4
CCUWC	Relaxed-Norm-Meta	Freshwater_lake_enrichment	Mendota Sort1 531vFSC P2	Microbial enrichment	Nextera XT	14	Relaxed	Read normalization	Metagenome	127771868	16539299	347018	283832	436	287	38016			0.665045	3	0	0	2
CCUWC	Relaxed-None-SingleCell	Freshwater_lake_enrichment	Mendota Sort1 531vFSC P2	Microbial enrichment	Nextera XT	14	Relaxed	None	Single-cell	134102058	26303016	433406	275332	478	289	37723			0.631084	7	0	0	7
CCUWC	Relaxed-Dedup-SingleCell	Freshwater_lake_enrichment	Mendota Sort1 531vFSC P2	Microbial enrichment	Nextera XT	14	Relaxed	Read deduplication	Single-cell	138919448	36907652	675129	253068	554	310	38325			0.593638	11	0	0	11
CCUWC	Relaxed-Norm-SingleCell	Freshwater_lake_enrichment	Mendota Sort1 531vFSC P2	Microbial enrichment	Nextera XT	14	Relaxed	Read normalization	Single-cell	128225572	25312279	421963	263259	478	288	37723			0.628551	7	0	0	9
CCUWG	Strict-None-Meta	Freshwater_lake_enrichment	Mendota Sort1 531vFSC P3	Microbial enrichment	Nextera XT	14	Strict	None	Metagenome	31184657	3953699	48527	70802	426	286	13937			0.640701	3	0	0	0
CCUWG	Strict-Dedup-Meta	Freshwater_lake_enrichment	Mendota Sort1 531vFSC P3	Microbial enrichment	Nextera XT	14	Strict	Read deduplication	Metagenome	29210905	5247735	43727	59200	495	297	15952			0.647355	3	0	0	0
CCUWG	Strict-Norm-Meta	Freshwater_lake_enrichment	Mendota Sort1 531vFSC P3	Microbial enrichment	Nextera XT	14	Strict	Read normalization	Metagenome	30659497	3887856	48487	69626	426	286	13937			0.640523	2	0	0	0
CCUWG	Strict-None-SingleCell	Freshwater_lake_enrichment	Mendota Sort1 531vFSC P3	Microbial enrichment	Nextera XT	14	Strict	None	Single-cell	30835857	5963322	76181	64469	467	287	15952			0.611903	3	0	0	2
CCUWG	Strict-Dedup-SingleCell	Freshwater_lake_enrichment	Mendota Sort1 531vFSC P3	Microbial enrichment	Nextera XT	14	Strict	Read deduplication	Single-cell	32305000	8998263	217016	58077	579	304	28503			0.575271	6	0	1	1
CCUWG	Strict-Norm-SingleCell	Freshwater_lake_enrichment	Mendota Sort1 531vFSC P3	Microbial enrichment	Nextera XT	14	Strict	Read normalization	Single-cell	30272803	5847287	60455	63435	466	287	13937			0.614053	5	0	0	2
CCUWG	Relaxed-None-Meta	Freshwater_lake_enrichment	Mendota Sort1 531vFSC P3	Microbial enrichment	Nextera XT	14	Relaxed	None	Metagenome	31984102	4092459	50256	72535	427	286	13937			0.642633	2	0	0	0
CCUWG	Relaxed-Dedup-Meta	Freshwater_lake_enrichment	Mendota Sort1 531vFSC P3	Microbial enrichment	Nextera XT	14	Relaxed	Read deduplication	Metagenome	29254628	4972892	26738	59357	495	300	13937			0.665031	3	0	0	0
CCUWG	Relaxed-Norm-Meta	Freshwater_lake_enrichment	Mendota Sort1 531vFSC P3	Microbial enrichment	Nextera XT	14	Relaxed	Read normalization	Metagenome	31384243	4043935	54399	71148	428	286	16435			0.640218	2	0	0	0
CCUWG	Relaxed-None-SingleCell	Freshwater_lake_enrichment	Mendota Sort1 531vFSC P3	Microbial enrichment	Nextera XT	14	Relaxed	None	Single-cell	31625478	6221332	99416	65917	469	287	15952			0.609817	4	0	0	2
CCUWG	Relaxed-Dedup-SingleCell	Freshwater_lake_enrichment	Mendota Sort1 531vFSC P3	Microbial enrichment	Nextera XT	14	Relaxed	Read deduplication	Single-cell	32864121	9186038	244691	58903	580	307	32387			0.588105	8	0	1	1
CCUWG	Relaxed-Norm-SingleCell	Freshwater_lake_enrichment	Mendota Sort1 531vFSC P3	Microbial enrichment	Nextera XT	14	Relaxed	Read normalization	Single-cell	30927716	6069309	74812	64534	469	287	13987			0.611103	4	0	0	2
CCUWH	Strict-None-Meta	Freshwater_lake_enrichment	Mendota Sort1 531vFSC P4	Microbial enrichment	Nextera XT	14	Strict	None	Metagenome	53525516	6775911	76060	124407	410	285	25672			0.613982	4	0	0	2
CCUWH	Strict-Dedup-Meta	Freshwater_lake_enrichment	Mendota Sort1 531vFSC P4	Microbial enrichment	Nextera XT	14	Strict	Read deduplication	Metagenome	47863400	8630226	95423	99443	466	295	25672			0.60593	5	0	0	2
CCUWH	Strict-Norm-Meta	Freshwater_lake_enrichment	Mendota Sort1 531vFSC P4	Microbial enrichment	Nextera XT	14	Strict	Read normalization	Metagenome	52493098	6731411	55002	121779	410	285	25672			0.613861	5	0	0	2
CCUWH	Strict-None-SingleCell	Freshwater_lake_enrichment	Mendota Sort1 531vFSC P4	Microbial enrichment	Nextera XT	14	Strict	None	Single-cell	53759244	10253911	240411	115329	441	286	25672			0.572179	7	0	0	4
CCUWH	Strict-Dedup-SingleCell	Freshwater_lake_enrichment	Mendota Sort1 531vFSC P4	Microbial enrichment	Nextera XT	14	Strict	Read deduplication	Single-cell	53838630	14127092	511172	101054	530	301	25672			0.540383	10	0	1	3
CCUWH	Strict-Norm-SingleCell	Freshwater_lake_enrichment	Mendota Sort1 531vFSC P4	Microbial enrichment	Nextera XT	14	Strict	Read normalization	Single-cell	52616941	10087332	181596	112896	440	286	25672			0.571485	8	0	0	2
CCUWH	Relaxed-None-Meta	Freshwater_lake_enrichment	Mendota Sort1 531vFSC P4	Microbial enrichment	Nextera XT	14	Relaxed	None	Metagenome	55965099	7111262	67041	129750	411	285	26029			0.612328	6	0	0	2
CCUWH	Relaxed-Dedup-Meta	Freshwater_lake_enrichment	Mendota Sort1 531vFSC P4	Microbial enrichment	Nextera XT	14	Relaxed	Read deduplication	Metagenome	49158464	8573532	103703	102250	466	297	26029			0.61585	4	0	0	2
CCUWH	Relaxed-Norm-Meta	Freshwater_lake_enrichment	Mendota Sort1 531vFSC P4	Microbial enrichment	Nextera XT	14	Relaxed	Read normalization	Metagenome	54529528	7067760	67448	126082	412	285	26029			0.610858	6	0	0	2
CCUWH	Relaxed-None-SingleCell	Freshwater_lake_enrichment	Mendota Sort1 531vFSC P4	Microbial enrichment	Nextera XT	14	Relaxed	None	Single-cell	56316573	10714215	204235	120647	442	287	25676			0.571987	7	0	1	3
CCUWH	Relaxed-Dedup-SingleCell	Freshwater_lake_enrichment	Mendota Sort1 531vFSC P4	Microbial enrichment	Nextera XT	14	Relaxed	Read deduplication	Single-cell	56253359	14557251	361030	106188	526	301	25676			0.544022	9	0	1	6
CCUWH	Relaxed-Norm-SingleCell	Freshwater_lake_enrichment	Mendota Sort1 531vFSC P4	Microbial enrichment	Nextera XT	14	Relaxed	Read normalization	Single-cell	54571266	10511180	229545	116600	443	286	32005			0.569796	10	0	0	3
CCUWN	Strict-None-Meta	Freshwater_lake_enrichment	Mendota Sort1 531vFSC P5	Microbial enrichment	Nextera XT	14	Strict	None	Metagenome	17490171	1222048	56409	46316	351	282	29654			0.586694	0	0	0	0
CCUWN	Strict-Dedup-Meta	Freshwater_lake_enrichment	Mendota Sort1 531vFSC P5	Microbial enrichment	Nextera XT	14	Strict	Read deduplication	Metagenome	16012422	1271463	58080	39978	375	285	29654			0.639042	0	0	0	0
CCUWN	Strict-Norm-Meta	Freshwater_lake_enrichment	Mendota Sort1 531vFSC P5	Microbial enrichment	Nextera XT	14	Strict	Read normalization	Metagenome	17059799	1195609	70522	45151	350	282	29654			0.595092	0	0	0	0
CCUWN	Strict-None-SingleCell	Freshwater_lake_enrichment	Mendota Sort1 531vFSC P5	Microbial enrichment	Nextera XT	14	Strict	None	Single-cell	17598199	1444446	65770	45569	357	282	55532			0.61626	0	0	0	0
CCUWN	Strict-Dedup-SingleCell	Freshwater_lake_enrichment	Mendota Sort1 531vFSC P5	Microbial enrichment	Nextera XT	14	Strict	Read deduplication	Single-cell	17977625	1852583	82305	43315	389	285	29654			0.658273	0	0	0	0
CCUWN	Strict-Norm-SingleCell	Freshwater_lake_enrichment	Mendota Sort1 531vFSC P5	Microbial enrichment	Nextera XT	14	Strict	Read normalization	Single-cell	17120801	1396732	70097	44378	357	282	59859			0.608177	0	0	0	0
CCUWN	Relaxed-None-Meta	Freshwater_lake_enrichment	Mendota Sort1 531vFSC P5	Microbial enrichment	Nextera XT	14	Relaxed	None	Metagenome	18350850	1297200	70522	48430	352	282	29654			0.582543	0	0	0	0
CCUWN	Relaxed-Dedup-Meta	Freshwater_lake_enrichment	Mendota Sort1 531vFSC P5	Microbial enrichment	Nextera XT	14	Relaxed	Read deduplication	Metagenome	15715471	1292650	59451	38630	381	287	28182			0.637809	0	0	0	0
CCUWN	Relaxed-Norm-Meta	Freshwater_lake_enrichment	Mendota Sort1 531vFSC P5	Microbial enrichment	Nextera XT	14	Relaxed	Read normalization	Metagenome	17751665	1271671	70562	46839	352	282	29694			0.582677	0	0	0	0
CCUWN	Relaxed-None-SingleCell	Freshwater_lake_enrichment	Mendota Sort1 531vFSC P5	Microbial enrichment	Nextera XT	14	Relaxed	None	Single-cell	18590991	1571287	70273	48061	358	282	30381			0.599698	0	0	0	0
CCUWN	Relaxed-Dedup-SingleCell	Freshwater_lake_enrichment	Mendota Sort1 531vFSC P5	Microbial enrichment	Nextera XT	14	Relaxed	Read deduplication	Single-cell	18532771	1947663	86793	44347	391	287	30381			0.655211	0	0	0	0
CCUWN	Relaxed-Norm-SingleCell	Freshwater_lake_enrichment	Mendota Sort1 531vFSC P5	Microbial enrichment	Nextera XT	14	Relaxed	Read normalization	Single-cell	17870104	1521476	81373	46139	358	282	30383			0.596546	0	0	0	0
CCUWO	Strict-None-Meta	Freshwater_lake_enrichment	Mendota Sort1 531vFSC P6	Microbial enrichment	Nextera XT	14	Strict	None	Metagenome	116753951	25507113	257641	232666	502	290	21369			0.602437	13	0	0	2
CCUWO	Strict-Dedup-Meta	Freshwater_lake_enrichment	Mendota Sort1 531vFSC P6	Microbial enrichment	Nextera XT	14	Strict	Read deduplication	Metagenome	103740898	30800109	319297	181698	608	311	17133			0.592617	13	0	0	3
CCUWO	Strict-Norm-Meta	Freshwater_lake_enrichment	Mendota Sort1 531vFSC P6	Microbial enrichment	Nextera XT	14	Strict	Read normalization	Metagenome	115137423	25368601	259028	229190	503	289	21369			0.603033	11	0	0	1
CCUWO	Strict-None-SingleCell	Freshwater_lake_enrichment	Mendota Sort1 531vFSC P6	Microbial enrichment	Nextera XT	14	Strict	None	Single-cell	118705263	37090648	1143974	210829	595	293	48076			0.547536	14	0	1	6
CCUWO	Strict-Dedup-SingleCell	Freshwater_lake_enrichment	Mendota Sort1 531vFSC P6	Microbial enrichment	Nextera XT	14	Strict	Read deduplication	Single-cell	112092161	43687483	2339665	172439	725	323	46147			0.513904	19	0	4	4
CCUWO	Strict-Norm-SingleCell	Freshwater_lake_enrichment	Mendota Sort1 531vFSC P6	Microbial enrichment	Nextera XT	14	Strict	Read normalization	Single-cell	116851658	36601213	1158381	207629	595	293	48076			0.549649	17	0	0	7
CCUWO	Relaxed-None-Meta	Freshwater_lake_enrichment	Mendota Sort1 531vFSC P6	Microbial enrichment	Nextera XT	14	Relaxed	None	Metagenome	134577252	31463218	347910	261494	520	293	23877			0.591155	14	0	0	4
CCUWO	Relaxed-Dedup-Meta	Freshwater_lake_enrichment	Mendota Sort1 531vFSC P6	Microbial enrichment	Nextera XT	14	Relaxed	Read deduplication	Metagenome	122797399	36369071	419157	214524	610	311	24701			0.59128	15	0	0	4
CCUWO	Relaxed-Norm-Meta	Freshwater_lake_enrichment	Mendota Sort1 531vFSC P6	Microbial enrichment	Nextera XT	14	Relaxed	Read normalization	Metagenome	129594113	31069356	320965	250437	525	292	19143			0.592125	15	0	0	6
CCUWO	Relaxed-None-SingleCell	Freshwater_lake_enrichment	Mendota Sort1 531vFSC P6	Microbial enrichment	Nextera XT	14	Relaxed	None	Single-cell	138091355	45754988	1386098	237582	624	299	48399			0.544657	20	0	2	9
CCUWO	Relaxed-Dedup-SingleCell	Freshwater_lake_enrichment	Mendota Sort1 531vFSC P6	Microbial enrichment	Nextera XT	14	Relaxed	Read deduplication	Single-cell	134167569	52456417	2994561	205982	724	323	46147			0.504492	20	0	7	4
CCUWO	Relaxed-Norm-SingleCell	Freshwater_lake_enrichment	Mendota Sort1 531vFSC P6	Microbial enrichment	Nextera XT	14	Relaxed	Read normalization	Single-cell	131848724	44468460	1390727	225497	632	298	48399			0.540787	20	0	2	8
CCUWP	Strict-None-Meta	Freshwater_lake_enrichment	Mendota Sort1 531v670 P1	Microbial enrichment	Nextera XT	14	Strict	None	Metagenome	13475281	587266	36502	37448	334	281	13905			0.597701	0	0	0	0
CCUWP	Strict-Dedup-Meta	Freshwater_lake_enrichment	Mendota Sort1 531v670 P1	Microbial enrichment	Nextera XT	14	Strict	Read deduplication	Metagenome	12088825	701571	25192	31047	366	284	13690			0.658065	0	0	0	0
CCUWP	Strict-Norm-Meta	Freshwater_lake_enrichment	Mendota Sort1 531v670 P1	Microbial enrichment	Nextera XT	14	Strict	Read normalization	Metagenome	13064119	578411	25381	36401	333	281	13905			0.6	0	0	0	0
CCUWP	Strict-None-SingleCell	Freshwater_lake_enrichment	Mendota Sort1 531v670 P1	Microbial enrichment	Nextera XT	14	Strict	None	Single-cell	13585090	726927	36022	37067	339	282	13905			0.62013	0	0	0	0
CCUWP	Strict-Dedup-SingleCell	Freshwater_lake_enrichment	Mendota Sort1 531v670 P1	Microbial enrichment	Nextera XT	14	Strict	Read deduplication	Single-cell	13523426	1024559	59936	33658	378	285	13897			0.661836	0	0	0	0
CCUWP	Strict-Norm-SingleCell	Freshwater_lake_enrichment	Mendota Sort1 531v670 P1	Microbial enrichment	Nextera XT	14	Strict	Read normalization	Single-cell	13159404	710010	36022	36019	337	281	13905			0.614094	0	0	0	0
CCUWP	Relaxed-None-Meta	Freshwater_lake_enrichment	Mendota Sort1 531v670 P1	Microbial enrichment	Nextera XT	14	Relaxed	None	Metagenome	14598515	680374	13905	40230	338	282	13905			0.611684	0	0	0	0
CCUWP	Relaxed-Dedup-Meta	Freshwater_lake_enrichment	Mendota Sort1 531v670 P1	Microbial enrichment	Nextera XT	14	Relaxed	Read deduplication	Metagenome	12706121	744539	37865	32300	370	286	13690			0.647799	0	0	0	0
CCUWP	Relaxed-Norm-Meta	Freshwater_lake_enrichment	Mendota Sort1 531v670 P1	Microbial enrichment	Nextera XT	14	Relaxed	Read normalization	Metagenome	13933134	662219	13905	38532	335	281	13905			0.603509	0	0	0	0
CCUWP	Relaxed-None-SingleCell	Freshwater_lake_enrichment	Mendota Sort1 531v670 P1	Microbial enrichment	Nextera XT	14	Relaxed	None	Single-cell	14847271	855401	36107	40148	342	282	13905			0.622857	0	0	0	0
CCUWP	Relaxed-Dedup-SingleCell	Freshwater_lake_enrichment	Mendota Sort1 531v670 P1	Microbial enrichment	Nextera XT	14	Relaxed	Read deduplication	Single-cell	14710146	1159941	62232	36309	380	286	14104			0.665957	0	0	0	0
CCUWP	Relaxed-Norm-SingleCell	Freshwater_lake_enrichment	Mendota Sort1 531v670 P1	Microbial enrichment	Nextera XT	14	Relaxed	Read normalization	Single-cell	14134490	842289	36107	38305	340	282	13905			0.618768	0	0	0	0
CCUWS	Strict-None-Meta	Freshwater_lake_enrichment	Mendota Sort1 531v670 P2	Microbial enrichment	Nextera XT	14	Strict	None	Metagenome	11093100	635985	10399	29796	347	282	10399			0.576803	0	0	0	0
CCUWS	Strict-Dedup-Meta	Freshwater_lake_enrichment	Mendota Sort1 531v670 P2	Microbial enrichment	Nextera XT	14	Strict	Read deduplication	Metagenome	10226584	854194		24910	386	287	7643			0.621864	0	0	0	0
CCUWS	Strict-Norm-Meta	Freshwater_lake_enrichment	Mendota Sort1 531v670 P2	Microbial enrichment	Nextera XT	14	Strict	Read normalization	Metagenome	10723654	632854		28840	346	282	8980			0.570968	0	0	0	0
CCUWS	Strict-None-SingleCell	Freshwater_lake_enrichment	Mendota Sort1 531v670 P2	Microbial enrichment	Nextera XT	14	Strict	None	Single-cell	11335434	822350	10003	29467	358	282	10003			0.590517	0	0	0	0
CCUWS	Strict-Dedup-SingleCell	Freshwater_lake_enrichment	Mendota Sort1 531v670 P2	Microbial enrichment	Nextera XT	14	Strict	Read deduplication	Single-cell	11580727	1218500		27150	403	289	9843			0.642691	0	0	0	0
CCUWS	Strict-Norm-SingleCell	Freshwater_lake_enrichment	Mendota Sort1 531v670 P2	Microbial enrichment	Nextera XT	14	Strict	Read normalization	Single-cell	10920913	794399		28450	357	282	8980			0.594966	0	0	0	0
CCUWS	Relaxed-None-Meta	Freshwater_lake_enrichment	Mendota Sort1 531v670 P2	Microbial enrichment	Nextera XT	14	Relaxed	None	Metagenome	12645777	779045	20637	33529	352	282	10566			0.585106	0	0	0	0
CCUWS	Relaxed-Dedup-Meta	Freshwater_lake_enrichment	Mendota Sort1 531v670 P2	Microbial enrichment	Nextera XT	14	Relaxed	Read deduplication	Metagenome	11631974	988437	10070	28261	386	288	10070			0.6656	0	0	0	0
CCUWS	Relaxed-Norm-Meta	Freshwater_lake_enrichment	Mendota Sort1 531v670 P2	Microbial enrichment	Nextera XT	14	Relaxed	Read normalization	Metagenome	11886832	759268	10071	31579	350	282	10071			0.580822	0	0	0	0
CCUWS	Relaxed-None-SingleCell	Freshwater_lake_enrichment	Mendota Sort1 531v670 P2	Microbial enrichment	Nextera XT	14	Relaxed	None	Single-cell	13058475	1040565	20637	33437	363	283	10566			0.625641	0	0	0	0
CCUWS	Relaxed-Dedup-SingleCell	Freshwater_lake_enrichment	Mendota Sort1 531v670 P2	Microbial enrichment	Nextera XT	14	Relaxed	Read deduplication	Single-cell	13554613	1513842	10071	31588	404	289	10071			0.649524	0	0	0	0
CCUWS	Relaxed-Norm-SingleCell	Freshwater_lake_enrichment	Mendota Sort1 531v670 P2	Microbial enrichment	Nextera XT	14	Relaxed	Read normalization	Single-cell	12204893	998397	10071	31341	361	283	10071			0.616088	0	0	0	0
CCUWT	Strict-None-Meta	Freshwater_lake_enrichment	Mendota Sort1 531v670 P3	Microbial enrichment	Nextera XT	14	Strict	None	Metagenome	33633264	3218786	75441	79866	403	285	24529			0.657504	2	0	0	0
CCUWT	Strict-Dedup-Meta	Freshwater_lake_enrichment	Mendota Sort1 531v670 P3	Microbial enrichment	Nextera XT	14	Strict	Read deduplication	Metagenome	30810158	4913407	55669	64540	469	297	16724			0.64313	4	0	0	0
CCUWT	Strict-Norm-Meta	Freshwater_lake_enrichment	Mendota Sort1 531v670 P3	Microbial enrichment	Nextera XT	14	Strict	Read normalization	Metagenome	32930477	3156532	75441	78308	403	285	24529			0.655469	2	0	0	0
CCUWT	Strict-None-SingleCell	Freshwater_lake_enrichment	Mendota Sort1 531v670 P3	Microbial enrichment	Nextera XT	14	Strict	None	Single-cell	33595255	5244230	91809	74168	433	286	28416			0.620108	4	0	0	1
CCUWT	Strict-Dedup-SingleCell	Freshwater_lake_enrichment	Mendota Sort1 531v670 P3	Microbial enrichment	Nextera XT	14	Strict	Read deduplication	Single-cell	34423218	8310473	250544	65248	529	303	28528			0.573248	5	0	1	2
CCUWT	Strict-Norm-SingleCell	Freshwater_lake_enrichment	Mendota Sort1 531v670 P3	Microbial enrichment	Nextera XT	14	Strict	Read normalization	Single-cell	32823318	5117941	91809	72660	431	286	28416			0.619871	4	0	0	1
CCUWT	Relaxed-None-Meta	Freshwater_lake_enrichment	Mendota Sort1 531v670 P3	Microbial enrichment	Nextera XT	14	Relaxed	None	Metagenome	35486124	3547484	63571	83692	407	285	24529			0.659791	2	0	0	0
CCUWT	Relaxed-Dedup-Meta	Freshwater_lake_enrichment	Mendota Sort1 531v670 P3	Microbial enrichment	Nextera XT	14	Relaxed	Read deduplication	Metagenome	32307740	5182400	40502	67388	471	299	16724			0.645156	3	0	0	0
CCUWT	Relaxed-Norm-Meta	Freshwater_lake_enrichment	Mendota Sort1 531v670 P3	Microbial enrichment	Nextera XT	14	Relaxed	Read normalization	Metagenome	34409301	3459382	63571	81226	406	285	24529			0.656706	2	0	0	0
CCUWT	Relaxed-None-SingleCell	Freshwater_lake_enrichment	Mendota Sort1 531v670 P3	Microbial enrichment	Nextera XT	14	Relaxed	None	Single-cell	35487941	5829841	90738	77702	436	286	24529			0.621823	4	0	0	1
CCUWT	Relaxed-Dedup-SingleCell	Freshwater_lake_enrichment	Mendota Sort1 531v670 P3	Microbial enrichment	Nextera XT	14	Relaxed	Read deduplication	Single-cell	36518746	8892800	240810	68998	531	304	28107			0.575823	6	0	1	2
CCUWT	Relaxed-Norm-SingleCell	Freshwater_lake_enrichment	Mendota Sort1 531v670 P3	Microbial enrichment	Nextera XT	14	Relaxed	Read normalization	Single-cell	34542821	5754167	90738	75373	439	286	24529			0.616703	3	0	0	2
CCUWU	Strict-None-Meta	Freshwater_lake_enrichment	Mendota Sort1 531v670 P4	Microbial enrichment	Nextera XT	14	Strict	None	Metagenome	33534040	4054265	66577	75739	429	286	15464			0.647951	2	0	0	0
CCUWU	Strict-Dedup-Meta	Freshwater_lake_enrichment	Mendota Sort1 531v670 P4	Microbial enrichment	Nextera XT	14	Strict	Read deduplication	Metagenome	30678228	6437674	40651	59687	521	304	14458			0.637546	5	0	0	1
CCUWU	Strict-Norm-Meta	Freshwater_lake_enrichment	Mendota Sort1 531v670 P4	Microbial enrichment	Nextera XT	14	Strict	Read normalization	Metagenome	33066644	3997642	66577	74705	430	286	15464			0.648402	2	0	0	0
CCUWU	Strict-None-SingleCell	Freshwater_lake_enrichment	Mendota Sort1 531v670 P4	Microbial enrichment	Nextera XT	14	Strict	None	Single-cell	33652720	6858412	77811	69215	477	288	15343			0.602968	5	0	0	2
CCUWU	Strict-Dedup-SingleCell	Freshwater_lake_enrichment	Mendota Sort1 531v670 P4	Microbial enrichment	Nextera XT	14	Strict	Read deduplication	Single-cell	33711993	10311323	297721	58496	599	312	19506			0.552731	7	0	2	1
CCUWU	Strict-Norm-SingleCell	Freshwater_lake_enrichment	Mendota Sort1 531v670 P4	Microbial enrichment	Nextera XT	14	Strict	Read normalization	Single-cell	33136677	6726139	77811	68267	477	287	15343			0.605104	3	0	0	2
CCUWU	Relaxed-None-Meta	Freshwater_lake_enrichment	Mendota Sort1 531v670 P4	Microbial enrichment	Nextera XT	14	Relaxed	None	Metagenome	36353723	4762461	79849	80835	438	287	15051			0.65405	3	0	0	0
CCUWU	Relaxed-Dedup-Meta	Freshwater_lake_enrichment	Mendota Sort1 531v670 P4	Microbial enrichment	Nextera XT	14	Relaxed	Read deduplication	Metagenome	33454456	7061396	40798	64958	523	305	14458			0.637596	5	0	0	1
CCUWU	Relaxed-Norm-Meta	Freshwater_lake_enrichment	Mendota Sort1 531v670 P4	Microbial enrichment	Nextera XT	14	Relaxed	Read normalization	Metagenome	35322650	4692917	79849	78478	439	287	15051			0.653094	3	0	0	0
CCUWU	Relaxed-None-SingleCell	Freshwater_lake_enrichment	Mendota Sort1 531v670 P4	Microbial enrichment	Nextera XT	14	Relaxed	None	Single-cell	36511698	7967978	79724	73784	487	288	24132			0.604726	7	0	0	1
CCUWU	Relaxed-Dedup-SingleCell	Freshwater_lake_enrichment	Mendota Sort1 531v670 P4	Microbial enrichment	Nextera XT	14	Relaxed	Read deduplication	Single-cell	37146172	11388505	295639	64310	599	312	24682			0.548027	8	0	1	2
CCUWU	Relaxed-Norm-SingleCell	Freshwater_lake_enrichment	Mendota Sort1 531v670 P4	Microbial enrichment	Nextera XT	14	Relaxed	Read normalization	Single-cell	35324621	7769969	79724	71387	488	288	24132			0.602984	4	0	0	2
CCUWW	Strict-None-Meta	Freshwater_lake_enrichment	Mendota Sort1 531v670 P5	Microbial enrichment	Nextera XT	14	Strict	None	Metagenome	181665407	41432747	2587486	360057	496	289	55883			0.556896	17	0	3	4
CCUWW	Strict-Dedup-Meta	Freshwater_lake_enrichment	Mendota Sort1 531v670 P5	Microbial enrichment	Nextera XT	14	Strict	Read deduplication	Metagenome	165362854	48333457	2752635	290595	592	310	57001			0.563925	20	0	3	3
CCUWW	Strict-Norm-Meta	Freshwater_lake_enrichment	Mendota Sort1 531v670 P5	Microbial enrichment	Nextera XT	14	Strict	Read normalization	Metagenome	178984174	41004222	2591982	354580	496	289	55883			0.555513	17	0	3	4
CCUWW	Strict-None-SingleCell	Freshwater_lake_enrichment	Mendota Sort1 531v670 P5	Microbial enrichment	Nextera XT	14	Strict	None	Single-cell	183326611	54028526	4466257	332830	562	291	71602			0.517201	23	1	5	3
CCUWW	Strict-Dedup-SingleCell	Freshwater_lake_enrichment	Mendota Sort1 531v670 P5	Microbial enrichment	Nextera XT	14	Strict	Read deduplication	Single-cell	179296903	64477685	7210924	285217	673	320	96622			0.502506	29	1	5	9
CCUWW	Strict-Norm-SingleCell	Freshwater_lake_enrichment	Mendota Sort1 531v670 P5	Microbial enrichment	Nextera XT	14	Strict	Read normalization	Single-cell	180303950	53219076	4449784	327470	562	291	71602			0.515382	22	1	4	3
CCUWW	Relaxed-None-Meta	Freshwater_lake_enrichment	Mendota Sort1 531v670 P5	Microbial enrichment	Nextera XT	14	Relaxed	None	Metagenome	203005966	48299536	2711884	395589	508	291	60136			0.557139	20	0	2	7
CCUWW	Relaxed-Dedup-Meta	Freshwater_lake_enrichment	Mendota Sort1 531v670 P5	Microbial enrichment	Nextera XT	14	Relaxed	Read deduplication	Metagenome	187640211	55126408	2738855	329198	595	311	56111			0.572822	19	0	3	8
CCUWW	Relaxed-Norm-Meta	Freshwater_lake_enrichment	Mendota Sort1 531v670 P5	Microbial enrichment	Nextera XT	14	Relaxed	Read normalization	Metagenome	196037767	47428554	2709411	380653	511	290	60136			0.551246	20	0	2	8
CCUWW	Relaxed-None-SingleCell	Freshwater_lake_enrichment	Mendota Sort1 531v670 P5	Microbial enrichment	Nextera XT	14	Relaxed	None	Single-cell	206138176	63482704	5560821	366500	582	295	83354			0.527013	28	0	5	9
CCUWW	Relaxed-Dedup-SingleCell	Freshwater_lake_enrichment	Mendota Sort1 531v670 P5	Microbial enrichment	Nextera XT	14	Relaxed	Read deduplication	Single-cell	205683576	74764163	7994355	326741	678	319	74617			0.506484	28	1	5	13
CCUWW	Relaxed-Norm-SingleCell	Freshwater_lake_enrichment	Mendota Sort1 531v670 P5	Microbial enrichment	Nextera XT	14	Relaxed	Read normalization	Single-cell	197600717	61752223	5497127	349838	587	294	83354			0.52905	27	1	4	8
CCUWX	Strict-None-Meta	Freshwater_lake_enrichment	Mendota Sort1 531v670 P6	Microbial enrichment	Nextera XT	14	Strict	None	Metagenome	189601544	26859554	423986	420946	432	287	42999			0.651734	8	0	0	6
CCUWX	Strict-Dedup-Meta	Freshwater_lake_enrichment	Mendota Sort1 531v670 P6	Microbial enrichment	Nextera XT	14	Strict	Read deduplication	Metagenome	173981993	35355053	498347	344620	498	303	42999			0.635147	10	0	0	7
CCUWX	Strict-Norm-Meta	Freshwater_lake_enrichment	Mendota Sort1 531v670 P6	Microbial enrichment	Nextera XT	14	Strict	Read normalization	Metagenome	185702200	26474129	440874	412324	432	287	42999			0.647137	8	0	0	6
CCUWX	Strict-None-SingleCell	Freshwater_lake_enrichment	Mendota Sort1 531v670 P6	Microbial enrichment	Nextera XT	14	Strict	None	Single-cell	193789753	39582230	842243	397860	473	288	42999			0.611416	10	0	0	9
CCUWX	Strict-Dedup-SingleCell	Freshwater_lake_enrichment	Mendota Sort1 531v670 P6	Microbial enrichment	Nextera XT	14	Strict	Read deduplication	Single-cell	193656305	51478567	1535159	353176	547	309	73112			0.572722	14	0	6	3
CCUWX	Strict-Norm-SingleCell	Freshwater_lake_enrichment	Mendota Sort1 531v670 P6	Microbial enrichment	Nextera XT	14	Strict	Read normalization	Single-cell	189298472	38769346	814456	389000	472	288	42999			0.609076	10	0	0	9
CCUWX	Relaxed-None-Meta	Freshwater_lake_enrichment	Mendota Sort1 531v670 P6	Microbial enrichment	Nextera XT	14	Relaxed	None	Metagenome	229554849	35075175	609335	497264	446	289	43063			0.643587	9	0	0	7
CCUWX	Relaxed-Dedup-Meta	Freshwater_lake_enrichment	Mendota Sort1 531v670 P6	Microbial enrichment	Nextera XT	14	Relaxed	Read deduplication	Metagenome	216050330	43749686	571964	426911	502	303	43063			0.639415	11	0	0	8
CCUWX	Relaxed-Norm-Meta	Freshwater_lake_enrichment	Mendota Sort1 531v670 P6	Microbial enrichment	Nextera XT	14	Relaxed	Read normalization	Metagenome	217051530	34081572	623938	468895	447	288	43063			0.641955	9	0	0	7
CCUWX	Relaxed-None-SingleCell	Freshwater_lake_enrichment	Mendota Sort1 531v670 P6	Microbial enrichment	Nextera XT	14	Relaxed	None	Single-cell	238070046	52150671	1781047	474785	492	290	43063			0.601164	14	0	2	8
CCUWX	Relaxed-Dedup-SingleCell	Freshwater_lake_enrichment	Mendota Sort1 531v670 P6	Microbial enrichment	Nextera XT	14	Relaxed	Read deduplication	Single-cell	244727800	65272807	2915991	444577	552	309	43063			0.573147	17	0	6	6
CCUWX	Relaxed-Norm-SingleCell	Freshwater_lake_enrichment	Mendota Sort1 531v670 P6	Microbial enrichment	Nextera XT	14	Relaxed	Read normalization	Single-cell	221993983	49872993	1720960	441171	495	289	43063			0.591627	13	0	2	8
CCUWZ	Strict-None-Meta	Freshwater_lake_enrichment	Mendota Sort1 531vSSC P2	Microbial enrichment	Nextera XT	14	Strict	None	Metagenome	105106660	10726341	171100	245096	411	286	37078			0.657419	5	0	0	0
CCUWZ	Strict-Dedup-Meta	Freshwater_lake_enrichment	Mendota Sort1 531vSSC P2	Microbial enrichment	Nextera XT	14	Strict	Read deduplication	Metagenome	98480861	16430191	204884	202563	477	302	37723			0.639839	7	0	0	3
CCUWZ	Strict-Norm-Meta	Freshwater_lake_enrichment	Mendota Sort1 531vSSC P2	Microbial enrichment	Nextera XT	14	Strict	Read normalization	Metagenome	102839565	10537969	160610	240018	411	286	37078			0.65487	5	0	0	0
CCUWZ	Strict-None-SingleCell	Freshwater_lake_enrichment	Mendota Sort1 531vSSC P2	Microbial enrichment	Nextera XT	14	Strict	None	Single-cell	108233429	17606286	230578	234020	445	287	37078			0.619621	11	0	0	6
CCUWZ	Strict-Dedup-SingleCell	Freshwater_lake_enrichment	Mendota Sort1 531vSSC P2	Microbial enrichment	Nextera XT	14	Strict	Read deduplication	Single-cell	109055664	24778576	627801	207318	520	308	37078			0.574573	14	0	2	5
CCUWZ	Strict-Norm-SingleCell	Freshwater_lake_enrichment	Mendota Sort1 531vSSC P2	Microbial enrichment	Nextera XT	14	Strict	Read normalization	Single-cell	105664927	17149381	220274	228924	444	287	37078			0.62027	7	0	1	5
CCUWZ	Relaxed-None-Meta	Freshwater_lake_enrichment	Mendota Sort1 531vSSC P2	Microbial enrichment	Nextera XT	14	Relaxed	None	Metagenome	133361852	15687103	238255	300253	429	288	37078			0.65317	9	0	0	3
CCUWZ	Relaxed-Dedup-Meta	Freshwater_lake_enrichment	Mendota Sort1 531vSSC P2	Microbial enrichment	Nextera XT	14	Relaxed	Read deduplication	Metagenome	129218621	22378828	256717	263184	484	302	37723			0.645977	11	0	0	5
CCUWZ	Relaxed-Norm-Meta	Freshwater_lake_enrichment	Mendota Sort1 531vSSC P2	Microbial enrichment	Nextera XT	14	Relaxed	Read normalization	Metagenome	124593807	15026391	244343	280309	429	287	37078			0.652584	8	0	0	3
CCUWZ	Relaxed-None-SingleCell	Freshwater_lake_enrichment	Mendota Sort1 531vSSC P2	Microbial enrichment	Nextera XT	14	Relaxed	None	Single-cell	139550873	25666122	382952	289788	470	289	37078			0.620382	9	0	0	5
CCUWZ	Relaxed-Dedup-SingleCell	Freshwater_lake_enrichment	Mendota Sort1 531vSSC P2	Microbial enrichment	Nextera XT	14	Relaxed	Read deduplication	Single-cell	144971199	34561531	810487	272031	531	308	43660			0.584264	16	0	4	4
CCUWZ	Relaxed-Norm-SingleCell	Freshwater_lake_enrichment	Mendota Sort1 531vSSC P2	Microbial enrichment	Nextera XT	14	Relaxed	Read normalization	Single-cell	128403307	24223149	373443	266393	471	288	37078			0.613781	11	0	0	5
CCUXA	Strict-None-Meta	Freshwater_lake_enrichment	Mendota Sort1 531vSSC P3	Microbial enrichment	Nextera XT	14	Strict	None	Metagenome	79997198	7089758	409353	188179	410	286	39176			0.689915	2	0	0	0
CCUXA	Strict-Dedup-Meta	Freshwater_lake_enrichment	Mendota Sort1 531vSSC P3	Microbial enrichment	Nextera XT	14	Strict	Read deduplication	Metagenome	74863046	11341701	368373	155974	472	300	39176			0.673403	6	0	0	0
CCUXA	Strict-Norm-Meta	Freshwater_lake_enrichment	Mendota Sort1 531vSSC P3	Microbial enrichment	Nextera XT	14	Strict	Read normalization	Metagenome	78499166	6979259	410537	184851	409	285	39176			0.689708	2	0	0	0
CCUXA	Strict-None-SingleCell	Freshwater_lake_enrichment	Mendota Sort1 531vSSC P3	Microbial enrichment	Nextera XT	14	Strict	None	Single-cell	80953326	11802176	410942	177719	440	286	33892			0.664136	7	0	0	1
CCUXA	Strict-Dedup-SingleCell	Freshwater_lake_enrichment	Mendota Sort1 531vSSC P3	Microbial enrichment	Nextera XT	14	Strict	Read deduplication	Single-cell	82309601	18288292	443230	157899	518	306	37723			0.624655	9	0	1	3
CCUXA	Strict-Norm-SingleCell	Freshwater_lake_enrichment	Mendota Sort1 531vSSC P3	Microbial enrichment	Nextera XT	14	Strict	Read normalization	Single-cell	79314508	11512912	396786	174487	439	286	33892			0.664309	6	0	0	1
CCUXA	Relaxed-None-Meta	Freshwater_lake_enrichment	Mendota Sort1 531vSSC P3	Microbial enrichment	Nextera XT	14	Relaxed	None	Metagenome	92517403	8988032	492018	212930	421	287	39176			0.689607	5	0	0	0
CCUXA	Relaxed-Dedup-Meta	Freshwater_lake_enrichment	Mendota Sort1 531vSSC P3	Microbial enrichment	Nextera XT	14	Relaxed	Read deduplication	Metagenome	88245125	13773806	438260	182252	478	301	39023			0.680632	5	0	0	0
CCUXA	Relaxed-Norm-Meta	Freshwater_lake_enrichment	Mendota Sort1 531vSSC P3	Microbial enrichment	Nextera XT	14	Relaxed	Read normalization	Metagenome	88088443	8692864	477862	202904	420	286	39176			0.687555	5	0	0	0
CCUXA	Relaxed-None-SingleCell	Freshwater_lake_enrichment	Mendota Sort1 531vSSC P3	Microbial enrichment	Nextera XT	14	Relaxed	None	Single-cell	94455705	15253589	515320	201875	456	288	37713			0.663163	5	0	0	3
CCUXA	Relaxed-Dedup-SingleCell	Freshwater_lake_enrichment	Mendota Sort1 531vSSC P3	Microbial enrichment	Nextera XT	14	Relaxed	Read deduplication	Single-cell	98327245	22556595	569312	186925	526	306	37723			0.619941	12	0	0	4
CCUXA	Relaxed-Norm-SingleCell	Freshwater_lake_enrichment	Mendota Sort1 531vSSC P3	Microbial enrichment	Nextera XT	14	Relaxed	Read normalization	Single-cell	89784156	14813307	494582	191450	458	287	37713			0.65965	4	0	0	2
CCUXB	Strict-None-Meta	Freshwater_lake_enrichment	Mendota Sort1 531vSSC P4	Microbial enrichment	Nextera XT	14	Strict	None	Metagenome	50855817	4198734	131174	122556	399	285	42175			0.672706	1	0	0	0
CCUXB	Strict-Dedup-Meta	Freshwater_lake_enrichment	Mendota Sort1 531vSSC P4	Microbial enrichment	Nextera XT	14	Strict	Read deduplication	Metagenome	47903391	6748556	110682	102199	457	295	34369			0.676339	3	0	0	0
CCUXB	Strict-Norm-Meta	Freshwater_lake_enrichment	Mendota Sort1 531vSSC P4	Microbial enrichment	Nextera XT	14	Strict	Read normalization	Metagenome	49924847	4111671	131174	120460	398	285	42175			0.671883	1	0	0	0
CCUXB	Strict-None-SingleCell	Freshwater_lake_enrichment	Mendota Sort1 531vSSC P4	Microbial enrichment	Nextera XT	14	Strict	None	Single-cell	50645165	6794572	130257	114515	423	285	34369			0.668707	2	0	0	1
CCUXB	Strict-Dedup-SingleCell	Freshwater_lake_enrichment	Mendota Sort1 531vSSC P4	Microbial enrichment	Nextera XT	14	Strict	Read deduplication	Single-cell	52589886	11693674	157702	102678	510	300	34369			0.623995	8	0	1	1
CCUXB	Strict-Norm-SingleCell	Freshwater_lake_enrichment	Mendota Sort1 531vSSC P4	Microbial enrichment	Nextera XT	14	Strict	Read normalization	Single-cell	49619732	6597164	131769	112475	422	285	34369			0.667088	2	0	0	1
CCUXB	Relaxed-None-Meta	Freshwater_lake_enrichment	Mendota Sort1 531vSSC P4	Microbial enrichment	Nextera XT	14	Relaxed	None	Metagenome	54051177	4679711	182378	129145	403	285	37604			0.670471	1	0	0	1
CCUXB	Relaxed-Dedup-Meta	Freshwater_lake_enrichment	Mendota Sort1 531vSSC P4	Microbial enrichment	Nextera XT	14	Relaxed	Read deduplication	Metagenome	50257273	7110652	146487	106391	462	298	37869			0.675298	2	0	0	1
CCUXB	Relaxed-Norm-Meta	Freshwater_lake_enrichment	Mendota Sort1 531vSSC P4	Microbial enrichment	Nextera XT	14	Relaxed	Read normalization	Metagenome	52443596	4537905	182378	125387	403	285	37604			0.669295	1	0	0	1
CCUXB	Relaxed-None-SingleCell	Freshwater_lake_enrichment	Mendota Sort1 531vSSC P4	Microbial enrichment	Nextera XT	14	Relaxed	None	Single-cell	53994571	7648163	224300	120612	428	286	37604			0.666586	5	0	0	2
CCUXB	Relaxed-Dedup-SingleCell	Freshwater_lake_enrichment	Mendota Sort1 531vSSC P4	Microbial enrichment	Nextera XT	14	Relaxed	Read deduplication	Single-cell	55961288	12706236	206949	108469	514	302	37604			0.63203	6	0	0	2
CCUXB	Relaxed-Norm-SingleCell	Freshwater_lake_enrichment	Mendota Sort1 531vSSC P4	Microbial enrichment	Nextera XT	14	Relaxed	Read normalization	Single-cell	52134772	7352996	224300	116649	428	286	37604			0.666371	4	0	0	2
CCUXC	Strict-None-Meta	Freshwater_lake_enrichment	Mendota Sort1 531vSSC P5	Microbial enrichment	Nextera XT	14	Strict	None	Metagenome	40828060	2994681	65174	99477	394	285	20652			0.67744	1	0	0	0
CCUXC	Strict-Dedup-Meta	Freshwater_lake_enrichment	Mendota Sort1 531vSSC P5	Microbial enrichment	Nextera XT	14	Strict	Read deduplication	Metagenome	39374519	4221355	79932	87730	434	293	29016			0.670704	2	0	0	0
CCUXC	Strict-Norm-Meta	Freshwater_lake_enrichment	Mendota Sort1 531vSSC P5	Microbial enrichment	Nextera XT	14	Strict	Read normalization	Metagenome	39933134	2919285	65174	97515	394	285	20652			0.677899	1	0	0	0
CCUXC	Strict-None-SingleCell	Freshwater_lake_enrichment	Mendota Sort1 531vSSC P5	Microbial enrichment	Nextera XT	14	Strict	None	Single-cell	40425012	4443606	91943	93948	411	285	20690			0.654369	1	0	0	0
CCUXC	Strict-Dedup-SingleCell	Freshwater_lake_enrichment	Mendota Sort1 531vSSC P5	Microbial enrichment	Nextera XT	14	Strict	Read deduplication	Single-cell	43145584	6987510	120262	89842	467	296	26319			0.619071	4	0	0	1
CCUXC	Strict-Norm-SingleCell	Freshwater_lake_enrichment	Mendota Sort1 531vSSC P5	Microbial enrichment	Nextera XT	14	Strict	Read normalization	Single-cell	39500963	4309132	81729	92073	410	285	20690			0.652002	1	0	0	1
CCUXC	Relaxed-None-Meta	Freshwater_lake_enrichment	Mendota Sort1 531vSSC P5	Microbial enrichment	Nextera XT	14	Relaxed	None	Metagenome	42487440	3146339	94016	103181	396	285	22479			0.683881	1	0	0	0
CCUXC	Relaxed-Dedup-Meta	Freshwater_lake_enrichment	Mendota Sort1 531vSSC P5	Microbial enrichment	Nextera XT	14	Relaxed	Read deduplication	Metagenome	39923531	4192168	73206	88326	438	296	22479			0.673122	2	0	0	0
CCUXC	Relaxed-Norm-Meta	Freshwater_lake_enrichment	Mendota Sort1 531vSSC P5	Microbial enrichment	Nextera XT	14	Relaxed	Read normalization	Metagenome	41268728	3030288	79137	100398	396	285	22479			0.682736	1	0	0	0
CCUXC	Relaxed-None-SingleCell	Freshwater_lake_enrichment	Mendota Sort1 531vSSC P5	Microbial enrichment	Nextera XT	14	Relaxed	None	Single-cell	42108174	4750831	120233	97416	413	285	26362			0.653112	2	0	0	1
CCUXC	Relaxed-Dedup-SingleCell	Freshwater_lake_enrichment	Mendota Sort1 531vSSC P5	Microbial enrichment	Nextera XT	14	Relaxed	Read deduplication	Single-cell	44589477	7344050	142131	92216	471	299	26331			0.616275	4	0	0	1
CCUXC	Relaxed-Norm-SingleCell	Freshwater_lake_enrichment	Mendota Sort1 531vSSC P5	Microbial enrichment	Nextera XT	14	Relaxed	Read normalization	Single-cell	40781791	4578099	107213	94569	412	285	26362			0.650109	2	0	0	0
CCUXG	Strict-None-Meta	Freshwater_lake_enrichment	Mendota Sort1 531vSSC P6	Microbial enrichment	Nextera XT	14	Strict	None	Metagenome	41945943	7014952	221641	92123	436	286	43085			0.583554	3	0	0	0
CCUXG	Strict-Dedup-Meta	Freshwater_lake_enrichment	Mendota Sort1 531vSSC P6	Microbial enrichment	Nextera XT	14	Strict	Read deduplication	Metagenome	40317448	8549454	235409	80258	495	296	43085			0.586454	5	0	0	0
CCUXG	Strict-Norm-Meta	Freshwater_lake_enrichment	Mendota Sort1 531vSSC P6	Microbial enrichment	Nextera XT	14	Strict	Read normalization	Metagenome	41104310	6910573	221664	90268	436	286	43085			0.58396	3	0	0	0
CCUXG	Strict-None-SingleCell	Freshwater_lake_enrichment	Mendota Sort1 531vSSC P6	Microbial enrichment	Nextera XT	14	Strict	None	Single-cell	41992834	9689694	370742	85332	477	287	43085			0.545827	4	0	0	1
CCUXG	Strict-Dedup-SingleCell	Freshwater_lake_enrichment	Mendota Sort1 531vSSC P6	Microbial enrichment	Nextera XT	14	Strict	Read deduplication	Single-cell	43445146	12334428	533529	79395	551	300	43085			0.532367	6	0	1	0
CCUXG	Strict-Norm-SingleCell	Freshwater_lake_enrichment	Mendota Sort1 531vSSC P6	Microbial enrichment	Nextera XT	14	Strict	Read normalization	Single-cell	41084096	9447973	370908	83562	476	287	43085			0.542051	4	0	0	1
CCUXG	Relaxed-None-Meta	Freshwater_lake_enrichment	Mendota Sort1 531vSSC P6	Microbial enrichment	Nextera XT	14	Relaxed	None	Metagenome	53760237	9419924	280311	115222	450	288	43088			0.576057	4	0	0	0
CCUXG	Relaxed-Dedup-Meta	Freshwater_lake_enrichment	Mendota Sort1 531vSSC P6	Microbial enrichment	Nextera XT	14	Relaxed	Read deduplication	Metagenome	52728640	11398626	272567	102922	507	302	43086			0.581533	5	0	0	0
CCUXG	Relaxed-Norm-Meta	Freshwater_lake_enrichment	Mendota Sort1 531vSSC P6	Microbial enrichment	Nextera XT	14	Relaxed	Read normalization	Metagenome	49882591	9089464	268151	106349	453	287	43088			0.574192	4	0	0	0
CCUXG	Relaxed-None-SingleCell	Freshwater_lake_enrichment	Mendota Sort1 531vSSC P6	Microbial enrichment	Nextera XT	14	Relaxed	None	Single-cell	55078250	13811857	742796	107428	504	289	43088			0.538841	6	0	0	1
CCUXG	Relaxed-Dedup-SingleCell	Freshwater_lake_enrichment	Mendota Sort1 531vSSC P6	Microbial enrichment	Nextera XT	14	Relaxed	Read deduplication	Single-cell	57943885	16921577	1105623	103485	564	307	43088			0.517476	7	0	1	2
CCUXG	Relaxed-Norm-SingleCell	Freshwater_lake_enrichment	Mendota Sort1 531vSSC P6	Microbial enrichment	Nextera XT	14	Relaxed	Read normalization	Single-cell	50353185	13079259	761749	97636	509	288	43088			0.53323	5	0	0	1
CCUXH	Strict-None-Meta	Freshwater_lake_enrichment	Mendota Sort2 P7	Microbial enrichment	Nextera XT	14	Strict	None	Metagenome	13050109	431062	67515	34269	364	283	28761			0.689119	0	0	0	0
CCUXH	Strict-Dedup-Meta	Freshwater_lake_enrichment	Mendota Sort2 P7	Microbial enrichment	Nextera XT	14	Strict	Read deduplication	Metagenome	12127396	1093817	67515	28365	407	287	28761			0.740876	0	0	0	0
CCUXH	Strict-Norm-Meta	Freshwater_lake_enrichment	Mendota Sort2 P7	Microbial enrichment	Nextera XT	14	Strict	Read normalization	Metagenome	12694200	418543	67515	33375	364	283	28761			0.684492	0	0	0	0
CCUXH	Strict-None-SingleCell	Freshwater_lake_enrichment	Mendota Sort2 P7	Microbial enrichment	Nextera XT	14	Strict	None	Single-cell	12960818	792507	67515	32573	377	284	28761			0.720685	0	0	0	0
CCUXH	Strict-Dedup-SingleCell	Freshwater_lake_enrichment	Mendota Sort2 P7	Microbial enrichment	Nextera XT	14	Strict	Read deduplication	Single-cell	13145707	2711207	67515	27634	449	289	28761			0.702245	1	0	0	1
CCUXH	Strict-Norm-SingleCell	Freshwater_lake_enrichment	Mendota Sort2 P7	Microbial enrichment	Nextera XT	14	Strict	Read normalization	Single-cell	12579052	748264	67515	31702	376	283	28761			0.702398	0	0	0	0
CCUXH	Relaxed-None-Meta	Freshwater_lake_enrichment	Mendota Sort2 P7	Microbial enrichment	Nextera XT	14	Relaxed	None	Metagenome	13434047	421167	67808	35257	365	283	28880			0.708895	0	0	0	0
CCUXH	Relaxed-Dedup-Meta	Freshwater_lake_enrichment	Mendota Sort2 P7	Microbial enrichment	Nextera XT	14	Relaxed	Read deduplication	Metagenome	12013558	967132	67689	28113	408	290	28761			0.734801	0	0	0	0
CCUXH	Relaxed-Norm-Meta	Freshwater_lake_enrichment	Mendota Sort2 P7	Microbial enrichment	Nextera XT	14	Relaxed	Read normalization	Metagenome	13015204	408534	67808	34216	364	283	28880			0.69382	0	0	0	0
CCUXH	Relaxed-None-SingleCell	Freshwater_lake_enrichment	Mendota Sort2 P7	Microbial enrichment	Nextera XT	14	Relaxed	None	Single-cell	13315115	829119	67689	33363	378	284	28761			0.733577	0	0	0	0
CCUXH	Relaxed-Dedup-SingleCell	Freshwater_lake_enrichment	Mendota Sort2 P7	Microbial enrichment	Nextera XT	14	Relaxed	Read deduplication	Single-cell	13358716	2664279	67689	28046	451	291	28761			0.71117	1	0	0	0
CCUXH	Relaxed-Norm-SingleCell	Freshwater_lake_enrichment	Mendota Sort2 P7	Microbial enrichment	Nextera XT	14	Relaxed	Read normalization	Single-cell	13029015	843303	67689	32492	380	284	28761			0.730816	0	0	0	0
CCUXN	Strict-None-Meta	Freshwater_lake_enrichment	Mendota Sort2 P8	Microbial enrichment	Nextera XT	14	Strict	None	Metagenome	66607623	14065501	1716288	136788	468	287	40160			0.497438	6	0	0	1
CCUXN	Strict-Dedup-Meta	Freshwater_lake_enrichment	Mendota Sort2 P8	Microbial enrichment	Nextera XT	14	Strict	Read deduplication	Metagenome	60043332	16274579	1569911	110011	548	303	45139			0.509986	8	0	1	0
CCUXN	Strict-Norm-Meta	Freshwater_lake_enrichment	Mendota Sort2 P8	Microbial enrichment	Nextera XT	14	Strict	Read normalization	Metagenome	65710066	13953431	1733929	134888	468	287	42361			0.495539	6	0	0	0
CCUXN	Strict-None-SingleCell	Freshwater_lake_enrichment	Mendota Sort2 P8	Microbial enrichment	Nextera XT	14	Strict	None	Single-cell	66777739	17665088	2648280	127580	514	288	69475			0.486926	9	0	0	2
CCUXN	Strict-Dedup-SingleCell	Freshwater_lake_enrichment	Mendota Sort2 P8	Microbial enrichment	Nextera XT	14	Strict	Read deduplication	Single-cell	64961667	21992565	3087848	108709	617	311	79116			0.477038	11	0	0	4
CCUXN	Strict-Norm-SingleCell	Freshwater_lake_enrichment	Mendota Sort2 P8	Microbial enrichment	Nextera XT	14	Strict	Read normalization	Single-cell	65794792	17423786	2578725	125812	513	288	66590			0.48834	9	0	1	2
CCUXN	Relaxed-None-Meta	Freshwater_lake_enrichment	Mendota Sort2 P8	Microbial enrichment	Nextera XT	14	Relaxed	None	Metagenome	69907650	14892841	1875129	142925	472	288	39938			0.498061	8	0	0	1
CCUXN	Relaxed-Dedup-Meta	Freshwater_lake_enrichment	Mendota Sort2 P8	Microbial enrichment	Nextera XT	14	Relaxed	Read deduplication	Metagenome	62744400	16814520	1529346	114908	550	305	47496			0.518211	7	0	1	0
CCUXN	Relaxed-Norm-Meta	Freshwater_lake_enrichment	Mendota Sort2 P8	Microbial enrichment	Nextera XT	14	Relaxed	Read normalization	Metagenome	68392098	14716403	1795520	139562	473	288	40159			0.495585	7	0	0	1
CCUXN	Relaxed-None-SingleCell	Freshwater_lake_enrichment	Mendota Sort2 P8	Microbial enrichment	Nextera XT	14	Relaxed	None	Single-cell	70063073	18885692	2697217	132980	519	289	66590			0.493897	8	0	0	2
CCUXN	Relaxed-Dedup-SingleCell	Freshwater_lake_enrichment	Mendota Sort2 P8	Microbial enrichment	Nextera XT	14	Relaxed	Read deduplication	Single-cell	68743758	23201891	3278524	115012	618	311	76842			0.473803	10	0	0	5
CCUXN	Relaxed-Norm-SingleCell	Freshwater_lake_enrichment	Mendota Sort2 P8	Microbial enrichment	Nextera XT	14	Relaxed	Read normalization	Single-cell	68675901	18724084	2723253	129859	524	289	66590			0.488931	9	0	0	1
CCUXO	Strict-None-Meta	Freshwater_lake_enrichment	Mendota Sort2 P9	Microbial enrichment	Nextera XT	14	Strict	None	Metagenome	125991033	33408556	1309694	240837	534	289	44402			0.577649	8	0	1	6
CCUXO	Strict-Dedup-Meta	Freshwater_lake_enrichment	Mendota Sort2 P9	Microbial enrichment	Nextera XT	14	Strict	Read deduplication	Metagenome	116647180	37077454	1642079	199432	627	309	44183			0.575237	8	0	2	6
CCUXO	Strict-Norm-Meta	Freshwater_lake_enrichment	Mendota Sort2 P9	Microbial enrichment	Nextera XT	14	Strict	Read normalization	Metagenome	124342663	33158522	1175348	237213	536	289	44402			0.584323	7	0	1	6
CCUXO	Strict-None-SingleCell	Freshwater_lake_enrichment	Mendota Sort2 P9	Microbial enrichment	Nextera XT	14	Strict	None	Single-cell	124842706	42611918	2758272	215265	620	291	54518			0.542941	10	0	3	6
CCUXO	Strict-Dedup-SingleCell	Freshwater_lake_enrichment	Mendota Sort2 P9	Microbial enrichment	Nextera XT	14	Strict	Read deduplication	Single-cell	124142662	50973048	4897673	187793	758	317	41515			0.500033	13	1	5	3
CCUXO	Strict-Norm-SingleCell	Freshwater_lake_enrichment	Mendota Sort2 P9	Microbial enrichment	Nextera XT	14	Strict	Read normalization	Single-cell	123041134	41945552	2684280	212393	620	291	54518			0.53305	9	0	3	6
CCUXO	Relaxed-None-Meta	Freshwater_lake_enrichment	Mendota Sort2 P9	Microbial enrichment	Nextera XT	14	Relaxed	None	Metagenome	130853854	34877224	1702257	249290	536	290	44402			0.581438	7	0	2	4
CCUXO	Relaxed-Dedup-Meta	Freshwater_lake_enrichment	Mendota Sort2 P9	Microbial enrichment	Nextera XT	14	Relaxed	Read deduplication	Metagenome	119722526	37351452	1509931	204992	623	312	44402			0.583095	10	0	1	5
CCUXO	Relaxed-Norm-Meta	Freshwater_lake_enrichment	Mendota Sort2 P9	Microbial enrichment	Nextera XT	14	Relaxed	Read normalization	Metagenome	128469000	34555260	1527721	243882	540	290	44402			0.576185	7	0	2	4
CCUXO	Relaxed-None-SingleCell	Freshwater_lake_enrichment	Mendota Sort2 P9	Microbial enrichment	Nextera XT	14	Relaxed	None	Single-cell	130055237	44812916	3205296	223174	625	292	54518			0.536728	10	0	3	7
CCUXO	Relaxed-Dedup-SingleCell	Freshwater_lake_enrichment	Mendota Sort2 P9	Microbial enrichment	Nextera XT	14	Relaxed	Read deduplication	Single-cell	129093467	53076064	5564836	194763	757	319	54518			0.50474	14	0	6	6
CCUXO	Relaxed-Norm-SingleCell	Freshwater_lake_enrichment	Mendota Sort2 P9	Microbial enrichment	Nextera XT	14	Relaxed	Read normalization	Single-cell	127168718	43978308	3101682	217810	628	292	54518			0.535299	10	0	3	7
CCUXP	Strict-None-Meta	Freshwater_lake_enrichment	Mendota Sort2 P10	Microbial enrichment	Nextera XT	14	Strict	None	Metagenome	79640461	16907216	426288	163668	481	288	34576			0.565636	12	0	0	4
CCUXP	Strict-Dedup-Meta	Freshwater_lake_enrichment	Mendota Sort2 P10	Microbial enrichment	Nextera XT	14	Strict	Read deduplication	Metagenome	69392584	19914960	502466	124111	591	304	34576			0.565768	14	0	0	3
CCUXP	Strict-Norm-Meta	Freshwater_lake_enrichment	Mendota Sort2 P10	Microbial enrichment	Nextera XT	14	Strict	Read normalization	Metagenome	79004124	16875190	471774	161775	484	288	34679			0.564467	13	0	0	3
CCUXP	Strict-None-SingleCell	Freshwater_lake_enrichment	Mendota Sort2 P10	Microbial enrichment	Nextera XT	14	Strict	None	Single-cell	80056286	23422617	947580	147722	560	290	34576			0.532434	16	0	0	3
CCUXP	Strict-Dedup-SingleCell	Freshwater_lake_enrichment	Mendota Sort2 P10	Microbial enrichment	Nextera XT	14	Strict	Read deduplication	Single-cell	76436601	29973112	1621153	118633	732	315	34576			0.507708	19	0	3	2
CCUXP	Strict-Norm-SingleCell	Freshwater_lake_enrichment	Mendota Sort2 P10	Microbial enrichment	Nextera XT	14	Strict	Read normalization	Single-cell	79110200	23191634	941176	145778	561	290	34461			0.534341	18	0	0	3
CCUXP	Relaxed-None-Meta	Freshwater_lake_enrichment	Mendota Sort2 P10	Microbial enrichment	Nextera XT	14	Relaxed	None	Metagenome	81796000	17365444	542844	167971	483	288	34336			0.56411	11	0	0	4
CCUXP	Relaxed-Dedup-Meta	Freshwater_lake_enrichment	Mendota Sort2 P10	Microbial enrichment	Nextera XT	14	Relaxed	Read deduplication	Metagenome	70410486	19696630	457915	126253	587	307	34336			0.575418	10	0	0	3
CCUXP	Relaxed-Norm-Meta	Freshwater_lake_enrichment	Mendota Sort2 P10	Microbial enrichment	Nextera XT	14	Relaxed	Read normalization	Metagenome	80851197	17351281	553729	165211	486	288	34576			0.56245	11	0	0	4
CCUXP	Relaxed-None-SingleCell	Freshwater_lake_enrichment	Mendota Sort2 P10	Microbial enrichment	Nextera XT	14	Relaxed	None	Single-cell	82123825	24196819	936358	150892	564	290	34576			0.534906	14	0	0	3
CCUXP	Relaxed-Dedup-SingleCell	Freshwater_lake_enrichment	Mendota Sort2 P10	Microbial enrichment	Nextera XT	14	Relaxed	Read deduplication	Single-cell	78504699	30598234	1755958	122080	728	316	35900			0.511276	19	0	1	4
CCUXP	Relaxed-Norm-SingleCell	Freshwater_lake_enrichment	Mendota Sort2 P10	Microbial enrichment	Nextera XT	14	Relaxed	Read normalization	Single-cell	81406403	24342626	1071473	148666	572	290	34471			0.533835	15	0	0	2
CCUXS	Strict-None-Meta	Freshwater_lake_enrichment	Mendota Sort2 P11	Microbial enrichment	Nextera XT	14	Strict	None	Metagenome	73202961	22768444	611852	132449	577	290	24688			0.528312	11	0	1	2
CCUXS	Strict-Dedup-Meta	Freshwater_lake_enrichment	Mendota Sort2 P11	Microbial enrichment	Nextera XT	14	Strict	Read deduplication	Metagenome	62146068	23728929	753267	98466	716	314	25081			0.510672	14	0	0	3
CCUXS	Strict-Norm-Meta	Freshwater_lake_enrichment	Mendota Sort2 P11	Microbial enrichment	Nextera XT	14	Strict	Read normalization	Metagenome	72547700	22674968	578038	131007	580	290	24688			0.525875	13	0	1	3
CCUXS	Strict-None-SingleCell	Freshwater_lake_enrichment	Mendota Sort2 P11	Microbial enrichment	Nextera XT	14	Strict	None	Single-cell	74473559	29259434	1956278	120050	697	296	24050			0.475637	16	0	1	1
CCUXS	Strict-Dedup-SingleCell	Freshwater_lake_enrichment	Mendota Sort2 P11	Microbial enrichment	Nextera XT	14	Strict	Read deduplication	Single-cell	67469687	31163328	3738221	92946	879	329	61329			0.435002	19	0	3	2
CCUXS	Strict-Norm-SingleCell	Freshwater_lake_enrichment	Mendota Sort2 P11	Microbial enrichment	Nextera XT	14	Strict	Read normalization	Single-cell	74013303	29043346	1725373	119467	697	296	27520			0.481452	15	0	3	0
CCUXS	Relaxed-None-Meta	Freshwater_lake_enrichment	Mendota Sort2 P11	Microbial enrichment	Nextera XT	14	Relaxed	None	Metagenome	84407109	26426637	734704	151553	582	294	20798			0.530283	14	0	0	2
CCUXS	Relaxed-Dedup-Meta	Freshwater_lake_enrichment	Mendota Sort2 P11	Microbial enrichment	Nextera XT	14	Relaxed	Read deduplication	Metagenome	74064553	27354894	847233	119797	691	313	26775			0.526503	14	0	1	3
CCUXS	Relaxed-Norm-Meta	Freshwater_lake_enrichment	Mendota Sort2 P11	Microbial enrichment	Nextera XT	14	Relaxed	Read normalization	Metagenome	80752633	26007749	746011	143268	596	294	20798			0.529462	14	0	0	3
CCUXS	Relaxed-None-SingleCell	Freshwater_lake_enrichment	Mendota Sort2 P11	Microbial enrichment	Nextera XT	14	Relaxed	None	Single-cell	86663588	34495451	2288965	138235	708	301	32423			0.477806	16	0	2	2
CCUXS	Relaxed-Dedup-SingleCell	Freshwater_lake_enrichment	Mendota Sort2 P11	Microbial enrichment	Nextera XT	14	Relaxed	Read deduplication	Single-cell	81230065	36420571	4032674	115246	839	325	45900			0.446986	20	0	4	4
CCUXS	Relaxed-Norm-SingleCell	Freshwater_lake_enrichment	Mendota Sort2 P11	Microbial enrichment	Nextera XT	14	Relaxed	Read normalization	Single-cell	82302522	33490153	2059729	129588	730	301	28790			0.488228	17	0	3	3
CCUXT	Strict-None-Meta	Freshwater_lake_enrichment	Mendota Sort2 P12	Microbial enrichment	Nextera XT	14	Strict	None	Metagenome	36663905	3449110	56525	88421	395	285	35392			0.638807	1	0	0	0
CCUXT	Strict-Dedup-Meta	Freshwater_lake_enrichment	Mendota Sort2 P12	Microbial enrichment	Nextera XT	14	Strict	Read deduplication	Metagenome	34231942	5206750	49777	73851	445	292	39170			0.650008	2	0	0	1
CCUXT	Strict-Norm-Meta	Freshwater_lake_enrichment	Mendota Sort2 P12	Microbial enrichment	Nextera XT	14	Strict	Read normalization	Metagenome	35915405	3374613	54548	86661	395	284	18702			0.63869	2	0	0	0
CCUXT	Strict-None-SingleCell	Freshwater_lake_enrichment	Mendota Sort2 P12	Microbial enrichment	Nextera XT	14	Strict	None	Single-cell	36389644	5194685	58227	82783	415	285	12728			0.619738	3	0	0	1
CCUXT	Strict-Dedup-SingleCell	Freshwater_lake_enrichment	Mendota Sort2 P12	Microbial enrichment	Nextera XT	14	Strict	Read deduplication	Single-cell	37615710	8533510	64096	74615	489	296	22832			0.580393	4	0	0	4
CCUXT	Strict-Norm-SingleCell	Freshwater_lake_enrichment	Mendota Sort2 P12	Microbial enrichment	Nextera XT	14	Strict	Read normalization	Single-cell	35633617	5094611	56693	81059	415	285	22832			0.61728	2	0	0	1
CCUXT	Relaxed-None-Meta	Freshwater_lake_enrichment	Mendota Sort2 P12	Microbial enrichment	Nextera XT	14	Relaxed	None	Metagenome	38359544	3712749	49903	92135	397	285	35634			0.642127	1	0	0	0
CCUXT	Relaxed-Dedup-Meta	Freshwater_lake_enrichment	Mendota Sort2 P12	Microbial enrichment	Nextera XT	14	Relaxed	Read deduplication	Metagenome	35007800	5131766	64740	75174	448	296	39951			0.652375	2	0	0	1
CCUXT	Relaxed-Norm-Meta	Freshwater_lake_enrichment	Mendota Sort2 P12	Microbial enrichment	Nextera XT	14	Relaxed	Read normalization	Metagenome	37267800	3604886	50155	89536	397	285	22832			0.641807	2	0	0	0
CCUXT	Relaxed-None-SingleCell	Freshwater_lake_enrichment	Mendota Sort2 P12	Microbial enrichment	Nextera XT	14	Relaxed	None	Single-cell	38129046	5615153	76264	86189	418	285	15018			0.617218	3	0	0	1
CCUXT	Relaxed-Dedup-SingleCell	Freshwater_lake_enrichment	Mendota Sort2 P12	Microbial enrichment	Nextera XT	14	Relaxed	Read deduplication	Single-cell	39175734	8863350	84597	77446	491	299	23927			0.582501	5	0	0	4
CCUXT	Relaxed-Norm-SingleCell	Freshwater_lake_enrichment	Mendota Sort2 P12	Microbial enrichment	Nextera XT	14	Relaxed	Read normalization	Single-cell	37244766	5570344	48962	83874	421	285	14269			0.61726	2	0	0	1
CCUXU	Strict-None-Meta	Freshwater_lake_enrichment	Mendota Sort2 P15	Microbial enrichment	Nextera XT	14	Strict	None	Metagenome	60648889	7290854	144943	141526	405	285	20285			0.606671	3	0	0	2
CCUXU	Strict-Dedup-Meta	Freshwater_lake_enrichment	Mendota Sort2 P15	Microbial enrichment	Nextera XT	14	Strict	Read deduplication	Metagenome	53566465	9328925	186382	112320	457	296	18640			0.609707	4	0	0	3
CCUXU	Strict-Norm-Meta	Freshwater_lake_enrichment	Mendota Sort2 P15	Microbial enrichment	Nextera XT	14	Strict	Read normalization	Metagenome	59459216	7248755	133490	138557	406	285	20285			0.6043	4	0	0	2
CCUXU	Strict-None-SingleCell	Freshwater_lake_enrichment	Mendota Sort2 P15	Microbial enrichment	Nextera XT	14	Strict	None	Single-cell	61593518	11102984	278631	133375	436	286	20796			0.57265	6	0	0	2
CCUXU	Strict-Dedup-SingleCell	Freshwater_lake_enrichment	Mendota Sort2 P15	Microbial enrichment	Nextera XT	14	Strict	Read deduplication	Single-cell	60667746	14771203	643860	116102	512	302	29548			0.549964	8	0	2	4
CCUXU	Strict-Norm-SingleCell	Freshwater_lake_enrichment	Mendota Sort2 P15	Microbial enrichment	Nextera XT	14	Strict	Read normalization	Single-cell	60222700	10876109	288072	130432	436	286	20796			0.572252	6	0	0	2
CCUXU	Relaxed-None-Meta	Freshwater_lake_enrichment	Mendota Sort2 P15	Microbial enrichment	Nextera XT	14	Relaxed	None	Metagenome	65341566	7985088	162843	151748	408	286	26038			0.608285	4	0	0	2
CCUXU	Relaxed-Dedup-Meta	Freshwater_lake_enrichment	Mendota Sort2 P15	Microbial enrichment	Nextera XT	14	Relaxed	Read deduplication	Metagenome	57708495	9892671	182267	121283	456	297	29055			0.614811	4	0	0	2
CCUXU	Relaxed-Norm-Meta	Freshwater_lake_enrichment	Mendota Sort2 P15	Microbial enrichment	Nextera XT	14	Relaxed	Read normalization	Metagenome	63192570	7930378	168388	146359	409	286	26038			0.610865	4	0	0	2
CCUXU	Relaxed-None-SingleCell	Freshwater_lake_enrichment	Mendota Sort2 P15	Microbial enrichment	Nextera XT	14	Relaxed	None	Single-cell	66607640	12121639	325505	143622	439	287	26102			0.57499	7	0	0	2
CCUXU	Relaxed-Dedup-SingleCell	Freshwater_lake_enrichment	Mendota Sort2 P15	Microbial enrichment	Nextera XT	14	Relaxed	Read deduplication	Single-cell	66460291	15732252	735201	128322	506	301	33790			0.552321	8	0	1	4
CCUXU	Relaxed-Norm-SingleCell	Freshwater_lake_enrichment	Mendota Sort2 P15	Microbial enrichment	Nextera XT	14	Relaxed	Read normalization	Single-cell	63953816	11850996	332638	137528	441	286	26102			0.57348	7	0	1	1
CCUXW	Strict-None-Meta	Freshwater_lake_enrichment	Mendota Sort2 P16	Microbial enrichment	Nextera XT	14	Strict	None	Metagenome	17353448	1175022		44126	374	283	8715			0.656716	1	0	0	0
CCUXW	Strict-Dedup-Meta	Freshwater_lake_enrichment	Mendota Sort2 P16	Microbial enrichment	Nextera XT	14	Strict	Read deduplication	Metagenome	16207057	1749023	10809	37262	415	288	10809			0.666955	1	0	0	0
CCUXW	Strict-Norm-Meta	Freshwater_lake_enrichment	Mendota Sort2 P16	Microbial enrichment	Nextera XT	14	Strict	Read normalization	Metagenome	17026237	1178835		43295	374	283	6687			0.657419	1	0	0	0
CCUXW	Strict-None-SingleCell	Freshwater_lake_enrichment	Mendota Sort2 P16	Microbial enrichment	Nextera XT	14	Strict	None	Single-cell	17212535	2103017	62375	40970	393	284	14724			0.629989	1	0	0	1
CCUXW	Strict-Dedup-SingleCell	Freshwater_lake_enrichment	Mendota Sort2 P16	Microbial enrichment	Nextera XT	14	Strict	Read deduplication	Single-cell	18632366	3450882	104837	38759	463	290	21014			0.569554	2	0	0	0
CCUXW	Strict-Norm-SingleCell	Freshwater_lake_enrichment	Mendota Sort2 P16	Microbial enrichment	Nextera XT	14	Strict	Read normalization	Single-cell	17032995	2169019	39410	40405	395	284	14671			0.627362	1	0	0	1
CCUXW	Relaxed-None-Meta	Freshwater_lake_enrichment	Mendota Sort2 P16	Microbial enrichment	Nextera XT	14	Relaxed	None	Metagenome	17830921	1172298	10099	45337	374	283	10099			0.651208	1	0	0	0
CCUXW	Relaxed-Dedup-Meta	Freshwater_lake_enrichment	Mendota Sort2 P16	Microbial enrichment	Nextera XT	14	Relaxed	Read deduplication	Metagenome	15940785	1638040		36505	418	291	9159			0.66201	1	0	0	0
CCUXW	Relaxed-Norm-Meta	Freshwater_lake_enrichment	Mendota Sort2 P16	Microbial enrichment	Nextera XT	14	Relaxed	Read normalization	Metagenome	17411189	1195602	10099	44185	375	283	10099			0.649359	1	0	0	0
CCUXW	Relaxed-None-SingleCell	Freshwater_lake_enrichment	Mendota Sort2 P16	Microbial enrichment	Nextera XT	14	Relaxed	None	Single-cell	17689138	2149644	25925	42070	393	284	15714			0.627555	1	0	0	1
CCUXW	Relaxed-Dedup-SingleCell	Freshwater_lake_enrichment	Mendota Sort2 P16	Microbial enrichment	Nextera XT	14	Relaxed	Read deduplication	Single-cell	18789964	3392109	81714	38969	465	293	17455			0.57548	2	0	1	0
CCUXW	Relaxed-Norm-SingleCell	Freshwater_lake_enrichment	Mendota Sort2 P16	Microbial enrichment	Nextera XT	14	Relaxed	Read normalization	Single-cell	17437029	2204494	21350	41273	396	284	11139			0.623749	1	0	0	1
CCUXX	Strict-None-Meta	Freshwater_lake_enrichment	Mendota Sort2 P17	Microbial enrichment	Nextera XT	14	Strict	None	Metagenome	133827685	29011716	1362881	278692	458	287	31398			0.533911	15	0	1	4
CCUXX	Strict-Dedup-Meta	Freshwater_lake_enrichment	Mendota Sort2 P17	Microbial enrichment	Nextera XT	14	Strict	Read deduplication	Metagenome	120512589	31990994	1465647	225903	529	300	38537			0.544833	14	0	1	3
CCUXX	Strict-Norm-Meta	Freshwater_lake_enrichment	Mendota Sort2 P17	Microbial enrichment	Nextera XT	14	Strict	Read normalization	Metagenome	131743592	28901911	1351883	273577	459	287	31398			0.532749	12	0	1	4
CCUXX	Strict-None-SingleCell	Freshwater_lake_enrichment	Mendota Sort2 P17	Microbial enrichment	Nextera XT	14	Strict	None	Single-cell	133959211	37090064	3130623	256338	507	288	40584			0.498795	19	0	2	5
CCUXX	Strict-Dedup-SingleCell	Freshwater_lake_enrichment	Mendota Sort2 P17	Microbial enrichment	Nextera XT	14	Strict	Read deduplication	Single-cell	133521856	44953182	5218453	226142	607	307	72293			0.482636	22	1	4	3
CCUXX	Strict-Norm-SingleCell	Freshwater_lake_enrichment	Mendota Sort2 P17	Microbial enrichment	Nextera XT	14	Strict	Read normalization	Single-cell	131647002	36719587	3101376	251673	507	288	40584			0.495321	19	0	2	6
CCUXX	Relaxed-None-Meta	Freshwater_lake_enrichment	Mendota Sort2 P17	Microbial enrichment	Nextera XT	14	Relaxed	None	Metagenome	138950688	29735296	1475304	289718	457	287	36975			0.540572	13	0	1	4
CCUXX	Relaxed-Dedup-Meta	Freshwater_lake_enrichment	Mendota Sort2 P17	Microbial enrichment	Nextera XT	14	Relaxed	Read deduplication	Metagenome	123455546	31683740	1336410	232360	527	302	33811			0.559109	16	0	1	4
CCUXX	Relaxed-Norm-Meta	Freshwater_lake_enrichment	Mendota Sort2 P17	Microbial enrichment	Nextera XT	14	Relaxed	Read normalization	Metagenome	135991899	29600955	1444511	282447	459	287	36971			0.536637	13	0	1	4
CCUXX	Relaxed-None-SingleCell	Freshwater_lake_enrichment	Mendota Sort2 P17	Microbial enrichment	Nextera XT	14	Relaxed	None	Single-cell	139503532	38140933	3154996	267551	505	289	40791			0.495492	21	0	2	5
CCUXX	Relaxed-Dedup-SingleCell	Freshwater_lake_enrichment	Mendota Sort2 P17	Microbial enrichment	Nextera XT	14	Relaxed	Read deduplication	Single-cell	138665360	45889333	5162002	235806	601	308	48516			0.485295	23	1	3	3
CCUXX	Relaxed-Norm-SingleCell	Freshwater_lake_enrichment	Mendota Sort2 P17	Microbial enrichment	Nextera XT	14	Relaxed	Read normalization	Single-cell	136815598	38225599	3274727	260535	512	288	40791			0.500218	17	0	2	4
CCUXY	Strict-None-Meta	Freshwater_lake_enrichment	Mendota Sort2 P18	Microbial enrichment	Nextera XT	14	Strict	None	Metagenome	102872368	21772154	924757	208761	479	289	27432			0.57042	8	0	2	3
CCUXY	Strict-Dedup-Meta	Freshwater_lake_enrichment	Mendota Sort2 P18	Microbial enrichment	Nextera XT	14	Strict	Read deduplication	Metagenome	93371036	25720111	1113036	168543	565	308	29481			0.561493	11	0	1	5
CCUXY	Strict-Norm-Meta	Freshwater_lake_enrichment	Mendota Sort2 P18	Microbial enrichment	Nextera XT	14	Strict	Read normalization	Metagenome	100674444	21561308	927167	203998	480	289	27247			0.567708	9	0	2	3
CCUXY	Strict-None-SingleCell	Freshwater_lake_enrichment	Mendota Sort2 P18	Microbial enrichment	Nextera XT	14	Strict	None	Single-cell	105805134	29647551	2115902	195247	548	291	34198			0.532701	12	0	4	3
CCUXY	Strict-Dedup-SingleCell	Freshwater_lake_enrichment	Mendota Sort2 P18	Microbial enrichment	Nextera XT	14	Strict	Read deduplication	Single-cell	101470507	34452083	3347733	166086	641	318	46464			0.509748	14	1	4	5
CCUXY	Strict-Norm-SingleCell	Freshwater_lake_enrichment	Mendota Sort2 P18	Microbial enrichment	Nextera XT	14	Strict	Read normalization	Single-cell	103530276	29197048	2111172	190749	550	290	34198			0.530915	11	0	4	3
CCUXY	Relaxed-None-Meta	Freshwater_lake_enrichment	Mendota Sort2 P18	Microbial enrichment	Nextera XT	14	Relaxed	None	Metagenome	132360072	28859877	1263284	261713	498	293	37231			0.575077	11	0	2	5
CCUXY	Relaxed-Dedup-Meta	Freshwater_lake_enrichment	Mendota Sort2 P18	Microbial enrichment	Nextera XT	14	Relaxed	Read deduplication	Metagenome	124826319	33653856	1530790	225698	567	309	37231			0.564876	13	0	2	5
CCUXY	Relaxed-Norm-Meta	Freshwater_lake_enrichment	Mendota Sort2 P18	Microbial enrichment	Nextera XT	14	Relaxed	Read normalization	Metagenome	123200517	28045595	1273772	241352	506	292	37231			0.569879	10	0	2	5
CCUXY	Relaxed-None-SingleCell	Freshwater_lake_enrichment	Mendota Sort2 P18	Microbial enrichment	Nextera XT	14	Relaxed	None	Single-cell	138338184	40834109	2728890	246784	578	299	54880			0.546409	14	1	4	5
CCUXY	Relaxed-Dedup-SingleCell	Freshwater_lake_enrichment	Mendota Sort2 P18	Microbial enrichment	Nextera XT	14	Relaxed	Read deduplication	Single-cell	137291880	46647186	4439956	224497	646	318	58731			0.516326	15	1	4	7
CCUXY	Relaxed-Norm-SingleCell	Freshwater_lake_enrichment	Mendota Sort2 P18	Microbial enrichment	Nextera XT	14	Relaxed	Read normalization	Single-cell	126830798	38922251	2770427	223835	590	298	54880			0.531189	13	1	4	4
CCUXZ	Strict-None-Meta	Freshwater_lake_enrichment	Mendota Sort2 P19	Microbial enrichment	Nextera XT	14	Strict	None	Metagenome	95762485	11292942	136563	213892	436	287	31684			0.658626	4	0	0	1
CCUXZ	Strict-Dedup-Meta	Freshwater_lake_enrichment	Mendota Sort2 P19	Microbial enrichment	Nextera XT	14	Strict	Read deduplication	Metagenome	87152464	16068664	169374	173382	503	304	38353			0.652145	5	0	0	4
CCUXZ	Strict-Norm-Meta	Freshwater_lake_enrichment	Mendota Sort2 P19	Microbial enrichment	Nextera XT	14	Strict	Read normalization	Metagenome	94107024	11072928	142293	210360	435	287	24730			0.656376	4	0	0	1
CCUXZ	Strict-None-SingleCell	Freshwater_lake_enrichment	Mendota Sort2 P19	Microbial enrichment	Nextera XT	14	Strict	None	Single-cell	96577007	17267377	266839	200169	477	289	25056			0.638619	5	0	0	4
CCUXZ	Strict-Dedup-SingleCell	Freshwater_lake_enrichment	Mendota Sort2 P19	Microbial enrichment	Nextera XT	14	Strict	Read deduplication	Single-cell	95142132	25237516	661432	171697	567	312	39345			0.59251	8	0	2	4
CCUXZ	Strict-Norm-SingleCell	Freshwater_lake_enrichment	Mendota Sort2 P19	Microbial enrichment	Nextera XT	14	Strict	Read normalization	Single-cell	94798999	16830925	258777	196921	475	288	26145			0.638451	5	0	0	4
CCUXZ	Relaxed-None-Meta	Freshwater_lake_enrichment	Mendota Sort2 P19	Microbial enrichment	Nextera XT	14	Relaxed	None	Metagenome	108686892	14293565	127866	237243	449	289	37956			0.663096	5	0	0	1
CCUXZ	Relaxed-Dedup-Meta	Freshwater_lake_enrichment	Mendota Sort2 P19	Microbial enrichment	Nextera XT	14	Relaxed	Read deduplication	Metagenome	100429660	18912471	118462	198122	512	305	24920			0.657602	5	0	0	3
CCUXZ	Relaxed-Norm-Meta	Freshwater_lake_enrichment	Mendota Sort2 P19	Microbial enrichment	Nextera XT	14	Relaxed	Read normalization	Metagenome	104309981	13842202	116529	227598	449	288	26619			0.660789	5	0	0	1
CCUXZ	Relaxed-None-SingleCell	Freshwater_lake_enrichment	Mendota Sort2 P19	Microbial enrichment	Nextera XT	14	Relaxed	None	Single-cell	110180651	21825079	306841	221949	497	290	25302			0.630891	8	0	1	3
CCUXZ	Relaxed-Dedup-SingleCell	Freshwater_lake_enrichment	Mendota Sort2 P19	Microbial enrichment	Nextera XT	14	Relaxed	Read deduplication	Single-cell	110862178	30242056	768470	197876	580	312	52497			0.600194	9	0	1	5
CCUXZ	Relaxed-Norm-SingleCell	Freshwater_lake_enrichment	Mendota Sort2 P19	Microbial enrichment	Nextera XT	14	Relaxed	Read normalization	Single-cell	105743656	21283370	317932	212264	501	290	25302			0.637181	6	0	0	4
CCUYA	Strict-None-Meta	Freshwater_lake_enrichment	Mendota Sort2 P20	Microbial enrichment	Nextera XT	14	Strict	None	Metagenome	165486096	27386695	949584	351817	456	289	37853			0.614633	7	0	0	6
CCUYA	Strict-Dedup-Meta	Freshwater_lake_enrichment	Mendota Sort2 P20	Microbial enrichment	Nextera XT	14	Strict	Read deduplication	Metagenome	153635645	34136050	882795	292902	527	306	37501			0.614926	7	0	1	6
CCUYA	Strict-Norm-Meta	Freshwater_lake_enrichment	Mendota Sort2 P20	Microbial enrichment	Nextera XT	14	Strict	Read normalization	Metagenome	162502892	26986242	910042	345713	455	289	37853			0.614589	7	0	0	6
CCUYA	Strict-None-SingleCell	Freshwater_lake_enrichment	Mendota Sort2 P20	Microbial enrichment	Nextera XT	14	Strict	None	Single-cell	165128271	37344394	2440999	323485	503	290	37853			0.576802	8	0	1	8
CCUYA	Strict-Dedup-SingleCell	Freshwater_lake_enrichment	Mendota Sort2 P20	Microbial enrichment	Nextera XT	14	Strict	Read deduplication	Single-cell	167174865	50079107	3804290	287400	601	314	48877			0.566355	10	0	0	11
CCUYA	Strict-Norm-SingleCell	Freshwater_lake_enrichment	Mendota Sort2 P20	Microbial enrichment	Nextera XT	14	Strict	Read normalization	Single-cell	161847399	36549058	2350770	317697	501	290	37853			0.569389	7	0	1	8
CCUYA	Relaxed-None-Meta	Freshwater_lake_enrichment	Mendota Sort2 P20	Microbial enrichment	Nextera XT	14	Relaxed	None	Metagenome	178594764	31096112	1057735	374098	465	290	43026			0.613779	7	0	0	8
CCUYA	Relaxed-Dedup-Meta	Freshwater_lake_enrichment	Mendota Sort2 P20	Microbial enrichment	Nextera XT	14	Relaxed	Read deduplication	Metagenome	165458024	37057195	944372	313145	532	307	43026			0.622195	9	0	1	6
CCUYA	Relaxed-Norm-Meta	Freshwater_lake_enrichment	Mendota Sort2 P20	Microbial enrichment	Nextera XT	14	Relaxed	Read normalization	Metagenome	173452436	30455028	1026275	363262	465	289	43026			0.606484	8	0	0	8
CCUYA	Relaxed-None-SingleCell	Freshwater_lake_enrichment	Mendota Sort2 P20	Microbial enrichment	Nextera XT	14	Relaxed	None	Single-cell	178637731	42647630	2681715	343323	517	291	43026			0.578018	11	0	1	9
CCUYA	Relaxed-Dedup-SingleCell	Freshwater_lake_enrichment	Mendota Sort2 P20	Microbial enrichment	Nextera XT	14	Relaxed	Read deduplication	Single-cell	182100220	55631402	4800058	309693	611	315	57911			0.563688	13	1	1	11
CCUYA	Relaxed-Norm-SingleCell	Freshwater_lake_enrichment	Mendota Sort2 P20	Microbial enrichment	Nextera XT	14	Relaxed	Read normalization	Single-cell	172661740	41439447	2681336	332111	516	291	45319			0.572921	11	0	1	9
CCUYB	Strict-None-Meta	Freshwater_lake_enrichment	Mendota Sort2 P23	Microbial enrichment	Nextera XT	14	Strict	None	Metagenome	29884921	2965312	464012	75099	367	283	34163			0.549425	0	0	0	2
CCUYB	Strict-Dedup-Meta	Freshwater_lake_enrichment	Mendota Sort2 P23	Microbial enrichment	Nextera XT	14	Strict	Read deduplication	Metagenome	27833104	3406596	445480	64788	397	288	42072			0.604077	0	0	0	2
CCUYB	Strict-Norm-Meta	Freshwater_lake_enrichment	Mendota Sort2 P23	Microbial enrichment	Nextera XT	14	Strict	Read normalization	Metagenome	29056392	2942964	492246	72985	367	283	34163			0.547141	0	0	0	2
CCUYB	Strict-None-SingleCell	Freshwater_lake_enrichment	Mendota Sort2 P23	Microbial enrichment	Nextera XT	14	Strict	None	Single-cell	29971185	3756244	628421	72415	379	283	42072			0.578613	0	0	0	2
CCUYB	Strict-Dedup-SingleCell	Freshwater_lake_enrichment	Mendota Sort2 P23	Microbial enrichment	Nextera XT	14	Strict	Read deduplication	Single-cell	31405001	4712039	606473	69804	417	290	42072			0.606265	1	0	0	3
CCUYB	Strict-Norm-SingleCell	Freshwater_lake_enrichment	Mendota Sort2 P23	Microbial enrichment	Nextera XT	14	Strict	Read normalization	Single-cell	29096576	3694967	624371	70345	378	283	41991			0.57617	0	0	0	3
CCUYB	Relaxed-None-Meta	Freshwater_lake_enrichment	Mendota Sort2 P23	Microbial enrichment	Nextera XT	14	Relaxed	None	Metagenome	31615535	3139272	501151	79161	369	283	34163			0.548596	0	0	0	2
CCUYB	Relaxed-Dedup-Meta	Freshwater_lake_enrichment	Mendota Sort2 P23	Microbial enrichment	Nextera XT	14	Relaxed	Read deduplication	Metagenome	28563667	3394392	424549	66202	399	290	42072			0.602001	0	0	0	2
CCUYB	Relaxed-Norm-Meta	Freshwater_lake_enrichment	Mendota Sort2 P23	Microbial enrichment	Nextera XT	14	Relaxed	Read normalization	Metagenome	30464937	3113557	516810	76222	369	283	34164			0.544	0	0	0	2
CCUYB	Relaxed-None-SingleCell	Freshwater_lake_enrichment	Mendota Sort2 P23	Microbial enrichment	Nextera XT	14	Relaxed	None	Single-cell	31955798	3953764	633129	77032	380	284	42072			0.588177	0	0	0	3
CCUYB	Relaxed-Dedup-SingleCell	Freshwater_lake_enrichment	Mendota Sort2 P23	Microbial enrichment	Nextera XT	14	Relaxed	Read deduplication	Single-cell	33134536	4916477	645970	73378	420	291	42072			0.620612	1	0	0	3
CCUYB	Relaxed-Norm-SingleCell	Freshwater_lake_enrichment	Mendota Sort2 P23	Microbial enrichment	Nextera XT	14	Relaxed	Read normalization	Single-cell	30639113	3934503	656155	73782	380	284	41991			0.583375	0	0	0	3
CCUYC	Strict-None-Meta	Freshwater_lake_enrichment	Mendota Sort2 P24	Microbial enrichment	Nextera XT	14	Strict	None	Metagenome	27415245	3033096	717949	68907	362	283	72621			0.508613	0	0	0	1
CCUYC	Strict-Dedup-Meta	Freshwater_lake_enrichment	Mendota Sort2 P24	Microbial enrichment	Nextera XT	14	Strict	Read deduplication	Metagenome	25560927	3220464	719752	59990	390	287	32819			0.5417	0	0	0	2
CCUYC	Strict-Norm-Meta	Freshwater_lake_enrichment	Mendota Sort2 P24	Microbial enrichment	Nextera XT	14	Strict	Read normalization	Metagenome	26530397	3011011	682764	66598	362	283	72621			0.505505	0	0	0	2
CCUYC	Strict-None-SingleCell	Freshwater_lake_enrichment	Mendota Sort2 P24	Microbial enrichment	Nextera XT	14	Strict	None	Single-cell	27517017	3728405	1051280	66620	373	283	42261			0.51207	0	0	0	3
CCUYC	Strict-Dedup-SingleCell	Freshwater_lake_enrichment	Mendota Sort2 P24	Microbial enrichment	Nextera XT	14	Strict	Read deduplication	Single-cell	28891797	4455308	1021341	64871	408	288	72621			0.567901	0	0	0	3
CCUYC	Strict-Norm-SingleCell	Freshwater_lake_enrichment	Mendota Sort2 P24	Microbial enrichment	Nextera XT	14	Strict	Read normalization	Single-cell	26576703	3685731	1078202	64324	372	283	72621			0.501878	0	0	0	2
CCUYC	Relaxed-None-Meta	Freshwater_lake_enrichment	Mendota Sort2 P24	Microbial enrichment	Nextera XT	14	Relaxed	None	Metagenome	28776715	3108336	719310	72216	364	283	82774			0.516157	0	0	0	3
CCUYC	Relaxed-Dedup-Meta	Freshwater_lake_enrichment	Mendota Sort2 P24	Microbial enrichment	Nextera XT	14	Relaxed	Read deduplication	Metagenome	25715176	3222880	617954	59907	393	289	39314			0.555818	0	0	0	2
CCUYC	Relaxed-Norm-Meta	Freshwater_lake_enrichment	Mendota Sort2 P24	Microbial enrichment	Nextera XT	14	Relaxed	Read normalization	Metagenome	27632950	3078188	691799	69263	364	283	91178			0.511936	0	0	0	3
CCUYC	Relaxed-None-SingleCell	Freshwater_lake_enrichment	Mendota Sort2 P24	Microbial enrichment	Nextera XT	14	Relaxed	None	Single-cell	29087055	3842865	927093	70403	374	283	50053			0.523843	0	0	0	2
CCUYC	Relaxed-Dedup-SingleCell	Freshwater_lake_enrichment	Mendota Sort2 P24	Microbial enrichment	Nextera XT	14	Relaxed	Read deduplication	Single-cell	29987915	4411941	868210	67245	410	290	45296			0.584244	0	0	0	2
CCUYC	Relaxed-Norm-SingleCell	Freshwater_lake_enrichment	Mendota Sort2 P24	Microbial enrichment	Nextera XT	14	Relaxed	Read normalization	Single-cell	27745402	3788549	1007224	67042	374	283	91178			0.509804	0	0	0	3
CCUYG	Strict-None-Meta	Freshwater_lake_enrichment	Mendota Sort2 P25	Microbial enrichment	Nextera XT	14	Strict	None	Metagenome	42982746	3093358	583294	109340	369	283	44047			0.649416	0	0	0	1
CCUYG	Strict-Dedup-Meta	Freshwater_lake_enrichment	Mendota Sort2 P25	Microbial enrichment	Nextera XT	14	Strict	Read deduplication	Metagenome	41286901	3637438	523912	97098	402	290	44047			0.672435	0	0	0	1
CCUYG	Strict-Norm-Meta	Freshwater_lake_enrichment	Mendota Sort2 P25	Microbial enrichment	Nextera XT	14	Strict	Read normalization	Metagenome	41628251	3009549	582475	106102	368	283	44047			0.6461	0	0	0	1
CCUYG	Strict-None-SingleCell	Freshwater_lake_enrichment	Mendota Sort2 P25	Microbial enrichment	Nextera XT	14	Strict	None	Single-cell	43210158	3758871	627699	106720	380	284	47975			0.648545	0	0	0	1
CCUYG	Strict-Dedup-SingleCell	Freshwater_lake_enrichment	Mendota Sort2 P25	Microbial enrichment	Nextera XT	14	Strict	Read deduplication	Single-cell	46169460	5214077	625770	104030	422	291	48049			0.672316	1	0	0	1
CCUYG	Strict-Norm-SingleCell	Freshwater_lake_enrichment	Mendota Sort2 P25	Microbial enrichment	Nextera XT	14	Strict	Read normalization	Single-cell	41761371	3603182	627028	103482	379	283	47975			0.64614	0	0	0	1
CCUYG	Relaxed-None-Meta	Freshwater_lake_enrichment	Mendota Sort2 P25	Microbial enrichment	Nextera XT	14	Relaxed	None	Metagenome	46734171	3514118	581754	117648	373	284	44047			0.652258	0	0	0	1
CCUYG	Relaxed-Dedup-Meta	Freshwater_lake_enrichment	Mendota Sort2 P25	Microbial enrichment	Nextera XT	14	Relaxed	Read deduplication	Metagenome	44152636	4059894	493630	102755	406	292	44047			0.674815	0	0	0	0
CCUYG	Relaxed-Norm-Meta	Freshwater_lake_enrichment	Mendota Sort2 P25	Microbial enrichment	Nextera XT	14	Relaxed	Read normalization	Metagenome	44494056	3364667	584353	112255	372	284	44047			0.646815	0	0	0	1
CCUYG	Relaxed-None-SingleCell	Freshwater_lake_enrichment	Mendota Sort2 P25	Microbial enrichment	Nextera XT	14	Relaxed	None	Single-cell	47274259	4391418	615295	115321	384	284	44047			0.656046	0	0	0	1
CCUYG	Relaxed-Dedup-SingleCell	Freshwater_lake_enrichment	Mendota Sort2 P25	Microbial enrichment	Nextera XT	14	Relaxed	Read deduplication	Single-cell	50512936	5918513	611085	112799	426	293	44047			0.677958	1	0	0	1
CCUYG	Relaxed-Norm-SingleCell	Freshwater_lake_enrichment	Mendota Sort2 P25	Microbial enrichment	Nextera XT	14	Relaxed	Read normalization	Single-cell	44984401	4203492	621548	109835	384	284	44047			0.653504	0	0	0	1
CCUYH	Strict-None-Meta	Freshwater_lake_enrichment	Mendota Sort2 P26	Microbial enrichment	Nextera XT	14	Strict	None	Metagenome	38594354	3020225	95869	92762	400	285	38350			0.657685	1	0	0	0
CCUYH	Strict-Dedup-Meta	Freshwater_lake_enrichment	Mendota Sort2 P26	Microbial enrichment	Nextera XT	14	Strict	Read deduplication	Metagenome	36611144	5087414	83580	77875	462	297	37723			0.657866	4	0	0	0
CCUYH	Strict-Norm-Meta	Freshwater_lake_enrichment	Mendota Sort2 P26	Microbial enrichment	Nextera XT	14	Strict	Read normalization	Metagenome	37719460	2944983	101869	90878	399	285	38350			0.656603	1	0	0	0
CCUYH	Strict-None-SingleCell	Freshwater_lake_enrichment	Mendota Sort2 P26	Microbial enrichment	Nextera XT	14	Strict	None	Single-cell	38417950	5205774	108312	86176	428	286	37723			0.629745	6	0	0	1
CCUYH	Strict-Dedup-SingleCell	Freshwater_lake_enrichment	Mendota Sort2 P26	Microbial enrichment	Nextera XT	14	Strict	Read deduplication	Single-cell	40682630	8851927	200185	78631	516	303	37723			0.591329	8	0	0	3
CCUYH	Strict-Norm-SingleCell	Freshwater_lake_enrichment	Mendota Sort2 P26	Microbial enrichment	Nextera XT	14	Strict	Read normalization	Single-cell	37789020	5166332	108616	84730	429	286	37723			0.629126	6	0	0	1
CCUYH	Relaxed-None-Meta	Freshwater_lake_enrichment	Mendota Sort2 P26	Microbial enrichment	Nextera XT	14	Relaxed	None	Metagenome	40767654	3364288	105396	97278	404	285	38350			0.660603	1	0	0	0
CCUYH	Relaxed-Dedup-Meta	Freshwater_lake_enrichment	Mendota Sort2 P26	Microbial enrichment	Nextera XT	14	Relaxed	Read deduplication	Metagenome	38170001	5197351	97640	80815	465	299	37746			0.656855	4	0	0	0
CCUYH	Relaxed-Norm-Meta	Freshwater_lake_enrichment	Mendota Sort2 P26	Microbial enrichment	Nextera XT	14	Relaxed	Read normalization	Metagenome	39493067	3258974	97801	94422	403	285	38350			0.658863	1	0	0	0
CCUYH	Relaxed-None-SingleCell	Freshwater_lake_enrichment	Mendota Sort2 P26	Microbial enrichment	Nextera XT	14	Relaxed	None	Single-cell	40613813	5732624	97744	90256	432	286	37723			0.626317	5	0	0	1
CCUYH	Relaxed-Dedup-SingleCell	Freshwater_lake_enrichment	Mendota Sort2 P26	Microbial enrichment	Nextera XT	14	Relaxed	Read deduplication	Single-cell	42944919	9473383	217760	82617	519	304	37723			0.596964	6	0	1	3
CCUYH	Relaxed-Norm-SingleCell	Freshwater_lake_enrichment	Mendota Sort2 P26	Microbial enrichment	Nextera XT	14	Relaxed	Read normalization	Single-cell	39178866	5498573	109949	87370	431	286	37723			0.624071	3	0	0	1
CCUYO	Strict-None-Meta	Freshwater_lake_enrichment	Mendota Sort2 P28	Microbial enrichment	Nextera XT	14	Strict	None	Metagenome	8387296	856546	113605	21478	355	282	58662			0.524927	0	0	0	0
CCUYO	Strict-Dedup-Meta	Freshwater_lake_enrichment	Mendota Sort2 P28	Microbial enrichment	Nextera XT	14	Strict	Read deduplication	Metagenome	7793067	883531	109679	18570	387	286	58662			0.561404	0	0	0	0
CCUYO	Strict-Norm-Meta	Freshwater_lake_enrichment	Mendota Sort2 P28	Microbial enrichment	Nextera XT	14	Strict	Read normalization	Metagenome	8180286	845469	113605	20975	355	282	58662			0.525074	0	0	0	0
CCUYO	Strict-None-SingleCell	Freshwater_lake_enrichment	Mendota Sort2 P28	Microbial enrichment	Nextera XT	14	Strict	None	Single-cell	8439378	964015	125064	21078	363	283	58662			0.551122	0	0	0	0
CCUYO	Strict-Dedup-SingleCell	Freshwater_lake_enrichment	Mendota Sort2 P28	Microbial enrichment	Nextera XT	14	Strict	Read deduplication	Single-cell	8738023	1124088	125001	20145	404	286	58662			0.567273	0	0	0	0
CCUYO	Strict-Norm-SingleCell	Freshwater_lake_enrichment	Mendota Sort2 P28	Microbial enrichment	Nextera XT	14	Strict	Read normalization	Single-cell	8215296	943612	117348	20560	363	282	58662			0.560794	0	0	0	0
CCUYO	Relaxed-None-Meta	Freshwater_lake_enrichment	Mendota Sort2 P28	Microbial enrichment	Nextera XT	14	Relaxed	None	Metagenome	9132761	1002561	123495	23089	360	283	58704			0.555831	0	0	0	0
CCUYO	Relaxed-Dedup-Meta	Freshwater_lake_enrichment	Mendota Sort2 P28	Microbial enrichment	Nextera XT	14	Relaxed	Read deduplication	Metagenome	8166250	1010790	110012	19044	397	288	37307			0.566514	0	0	0	0
CCUYO	Relaxed-Norm-Meta	Freshwater_lake_enrichment	Mendota Sort2 P28	Microbial enrichment	Nextera XT	14	Relaxed	Read normalization	Metagenome	8766482	985105	115754	22178	359	283	58704			0.551899	0	0	0	0
CCUYO	Relaxed-None-SingleCell	Freshwater_lake_enrichment	Mendota Sort2 P28	Microbial enrichment	Nextera XT	14	Relaxed	None	Single-cell	9260649	1147795	125292	22800	369	283	58704			0.563941	0	0	0	0
CCUYO	Relaxed-Dedup-SingleCell	Freshwater_lake_enrichment	Mendota Sort2 P28	Microbial enrichment	Nextera XT	14	Relaxed	Read deduplication	Single-cell	9423476	1290142	112629	21316	412	288	58704			0.582508	0	0	0	0
CCUYO	Relaxed-Norm-SingleCell	Freshwater_lake_enrichment	Mendota Sort2 P28	Microbial enrichment	Nextera XT	14	Relaxed	Read normalization	Single-cell	8848930	1113530	123741	21773	369	283	58704			0.567452	0	0	0	0
CGHUN	Strict-None-Meta	Boncat_Soil	BONCAT_SYTO_Terrestrial_sediment - 1	Microbial enrichment	Nextera XT	24	Strict	None	Metagenome	122162883	6738588	85325	320575	360	283	43846			0.660671	2	0	0	1
CGHUN	Strict-Dedup-Meta	Boncat_Soil	BONCAT_SYTO_Terrestrial_sediment - 1	Microbial enrichment	Nextera XT	24	Strict	Read deduplication	Metagenome	127071998	12752295	89003	286977	428	295	42248			0.656403	3	0	0	2
CGHUN	Strict-Norm-Meta	Boncat_Soil	BONCAT_SYTO_Terrestrial_sediment - 1	Microbial enrichment	Nextera XT	24	Strict	Read normalization	Metagenome	120203736	6654963	85325	315805	359	283	43846			0.658718	2	0	0	1
CGHUN	Strict-None-SingleCell	Boncat_Soil	BONCAT_SYTO_Terrestrial_sediment - 1	Microbial enrichment	Nextera XT	24	Strict	None	Single-cell	120897571	12218646	307767	298594	375	284	43846			0.566348	3	0	1	2
CGHUN	Strict-Dedup-SingleCell	Boncat_Soil	BONCAT_SYTO_Terrestrial_sediment - 1	Microbial enrichment	Nextera XT	24	Strict	Read deduplication	Single-cell	149213640	18992115	1549651	328811	431	295	43846			0.540298	5	1	1	1
CGHUN	Strict-Norm-SingleCell	Boncat_Soil	BONCAT_SYTO_Terrestrial_sediment - 1	Microbial enrichment	Nextera XT	24	Strict	Read normalization	Single-cell	118788122	12047937	307611	293821	374	284	43846			0.562177	3	0	1	2
CGHUN	Relaxed-None-Meta	Boncat_Soil	BONCAT_SYTO_Terrestrial_sediment - 1	Microbial enrichment	Nextera XT	24	Relaxed	None	Metagenome	142826382	8599820	70987	367704	367	284	44785			0.660707	2	0	0	1
CGHUN	Relaxed-Dedup-Meta	Boncat_Soil	BONCAT_SYTO_Terrestrial_sediment - 1	Microbial enrichment	Nextera XT	24	Relaxed	Read deduplication	Metagenome	149598161	15001090	102493	336333	430	296	43166			0.654874	3	0	0	3
CGHUN	Relaxed-Norm-Meta	Boncat_Soil	BONCAT_SYTO_Terrestrial_sediment - 1	Microbial enrichment	Nextera XT	24	Relaxed	Read normalization	Metagenome	136920837	8433947	70987	352917	366	283	44785			0.658986	2	0	0	1
CGHUN	Relaxed-None-SingleCell	Boncat_Soil	BONCAT_SYTO_Terrestrial_sediment - 1	Microbial enrichment	Nextera XT	24	Relaxed	None	Single-cell	141724886	14903022	416270	343845	382	284	44785			0.573483	4	0	1	2
CGHUN	Relaxed-Dedup-SingleCell	Boncat_Soil	BONCAT_SYTO_Terrestrial_sediment - 1	Microbial enrichment	Nextera XT	24	Relaxed	Read deduplication	Single-cell	175426964	22267026	1652204	386285	431	296	44785			0.551868	6	0	2	1
CGHUN	Relaxed-Norm-SingleCell	Boncat_Soil	BONCAT_SYTO_Terrestrial_sediment - 1	Microbial enrichment	Nextera XT	24	Relaxed	Read normalization	Single-cell	135792144	14845750	397861	328566	383	284	44785			0.568004	3	0	1	2
CGHUO	Strict-None-Meta	Boncat_Soil	BONCAT_SYTO_Terrestrial_sediment - 2	Microbial enrichment	Nextera XT	24	Strict	None	Metagenome	66768752	7265082	35906	166172	370	283	21365			0.610952	2	0	0	2
CGHUO	Strict-Dedup-Meta	Boncat_Soil	BONCAT_SYTO_Terrestrial_sediment - 2	Microbial enrichment	Nextera XT	24	Strict	Read deduplication	Metagenome	63387803	9494439	35906	140693	421	293	21365			0.593538	3	0	0	3
CGHUO	Strict-Norm-Meta	Boncat_Soil	BONCAT_SYTO_Terrestrial_sediment - 2	Microbial enrichment	Nextera XT	24	Strict	Read normalization	Metagenome	64162088	7146851	35906	159753	369	283	21365			0.61088	2	0	0	2
CGHUO	Strict-None-SingleCell	Boncat_Soil	BONCAT_SYTO_Terrestrial_sediment - 2	Microbial enrichment	Nextera XT	24	Strict	None	Single-cell	70569334	12132314	664931	162699	391	284	21365			0.472565	3	0	2	1
CGHUO	Strict-Dedup-SingleCell	Boncat_Soil	BONCAT_SYTO_Terrestrial_sediment - 2	Microbial enrichment	Nextera XT	24	Strict	Read deduplication	Single-cell	80625987	14183264	2775836	168960	442	297	39964			0.411012	3	0	1	1
CGHUO	Strict-Norm-SingleCell	Boncat_Soil	BONCAT_SYTO_Terrestrial_sediment - 2	Microbial enrichment	Nextera XT	24	Strict	Read normalization	Single-cell	67411648	12011227	648307	155155	391	283	21365			0.46678	3	0	2	1
CGHUO	Relaxed-None-Meta	Boncat_Soil	BONCAT_SYTO_Terrestrial_sediment - 2	Microbial enrichment	Nextera XT	24	Relaxed	None	Metagenome	90047591	9544418	75040	219314	382	284	39651			0.599268	3	0	0	2
CGHUO	Relaxed-Dedup-Meta	Boncat_Soil	BONCAT_SYTO_Terrestrial_sediment - 2	Microbial enrichment	Nextera XT	24	Relaxed	Read deduplication	Metagenome	90764747	11749793	53540	203777	420	293	39651			0.600374	3	0	0	3
CGHUO	Relaxed-Norm-Meta	Boncat_Soil	BONCAT_SYTO_Terrestrial_sediment - 2	Microbial enrichment	Nextera XT	24	Relaxed	Read normalization	Metagenome	81114555	9361184	75040	196880	382	284	39651			0.600176	2	0	0	3
CGHUO	Relaxed-None-SingleCell	Boncat_Soil	BONCAT_SYTO_Terrestrial_sediment - 2	Microbial enrichment	Nextera XT	24	Relaxed	None	Single-cell	99695922	15632914	1208919	225623	407	285	39649			0.48013	3	0	2	1
CGHUO	Relaxed-Dedup-SingleCell	Boncat_Soil	BONCAT_SYTO_Terrestrial_sediment - 2	Microbial enrichment	Nextera XT	24	Relaxed	Read deduplication	Single-cell	116908483	18040191	3785234	248393	442	297	48360			0.447722	4	1	2	0
CGHUO	Relaxed-Norm-SingleCell	Boncat_Soil	BONCAT_SYTO_Terrestrial_sediment - 2	Microbial enrichment	Nextera XT	24	Relaxed	Read normalization	Single-cell	86609385	15050178	1230500	194416	407	285	39649			0.467068	4	0	2	1
CGHUP	Strict-None-Meta	Boncat_Soil	BONCAT_SYTO_Terrestrial_sediment - 3	Microbial enrichment	Nextera XT	24	Strict	None	Metagenome	178659091	13720401	271257	445148	381	284	59301			0.645037	3	0	0	3
CGHUP	Strict-Dedup-Meta	Boncat_Soil	BONCAT_SYTO_Terrestrial_sediment - 3	Microbial enrichment	Nextera XT	24	Strict	Read deduplication	Metagenome	183777832	23703444	271390	395494	453	299	44259			0.64222	5	0	0	5
CGHUP	Strict-Norm-Meta	Boncat_Soil	BONCAT_SYTO_Terrestrial_sediment - 3	Microbial enrichment	Nextera XT	24	Strict	Read normalization	Metagenome	169541876	13357918	255055	423423	380	284	59283			0.643621	4	0	0	3
CGHUP	Strict-None-SingleCell	Boncat_Soil	BONCAT_SYTO_Terrestrial_sediment - 3	Microbial enrichment	Nextera XT	24	Strict	None	Single-cell	186180751	26003171	1497233	423384	412	286	59301			0.528829	6	0	3	3
CGHUP	Strict-Dedup-SingleCell	Boncat_Soil	BONCAT_SYTO_Terrestrial_sediment - 3	Microbial enrichment	Nextera XT	24	Strict	Read deduplication	Single-cell	210969298	34142644	4400285	437512	462	301	59301			0.525409	8	1	2	4
CGHUP	Strict-Norm-SingleCell	Boncat_Soil	BONCAT_SYTO_Terrestrial_sediment - 3	Microbial enrichment	Nextera XT	24	Strict	Read normalization	Single-cell	175107255	24934955	1469954	399188	410	285	59283			0.520979	6	0	3	3
CGHUP	Relaxed-None-Meta	Boncat_Soil	BONCAT_SYTO_Terrestrial_sediment - 3	Microbial enrichment	Nextera XT	24	Relaxed	None	Metagenome	267430775	23190892	329480	634658	406	287	63902			0.647582	5	0	0	5
CGHUP	Relaxed-Dedup-Meta	Boncat_Soil	BONCAT_SYTO_Terrestrial_sediment - 3	Microbial enrichment	Nextera XT	24	Relaxed	Read deduplication	Metagenome	285143460	39115400	361540	602116	466	301	63902			0.648777	11	0	0	6
CGHUP	Relaxed-Norm-Meta	Boncat_Soil	BONCAT_SYTO_Terrestrial_sediment - 3	Microbial enrichment	Nextera XT	24	Relaxed	Read normalization	Metagenome	234710861	21657855	322373	557790	405	286	63990			0.648444	4	0	0	5
CGHUP	Relaxed-None-SingleCell	Boncat_Soil	BONCAT_SYTO_Terrestrial_sediment - 3	Microbial enrichment	Nextera XT	24	Relaxed	None	Single-cell	283203563	42343298	2383493	617045	438	289	64002			0.567814	10	0	3	3
CGHUP	Relaxed-Dedup-SingleCell	Boncat_Soil	BONCAT_SYTO_Terrestrial_sediment - 3	Microbial enrichment	Nextera XT	24	Relaxed	Read deduplication	Single-cell	324984680	53810508	5451710	667058	472	302	63902			0.560013	12	2	1	5
CGHUP	Relaxed-Norm-SingleCell	Boncat_Soil	BONCAT_SYTO_Terrestrial_sediment - 3	Microbial enrichment	Nextera XT	24	Relaxed	Read normalization	Single-cell	242838760	39486636	2377216	524506	443	288	64540			0.552302	10	0	3	3
CGHUS	Strict-None-Meta	Boncat_Soil	BONCAT_SYTO_Terrestrial_sediment - 4	Microbial enrichment	Nextera XT	24	Strict	None	Metagenome	110749428	21430712	2123467	236169	443	286	58655			0.510085	3	0	0	4
CGHUS	Strict-Dedup-Meta	Boncat_Soil	BONCAT_SYTO_Terrestrial_sediment - 4	Microbial enrichment	Nextera XT	24	Strict	Read deduplication	Metagenome	109036924	27214843	2103129	204005	536	305	59613			0.525392	5	0	0	6
CGHUS	Strict-Norm-Meta	Boncat_Soil	BONCAT_SYTO_Terrestrial_sediment - 4	Microbial enrichment	Nextera XT	24	Strict	Read normalization	Metagenome	107635230	20307607	1604734	231869	442	286	38713			0.520186	4	0	0	5
CGHUS	Strict-None-SingleCell	Boncat_Soil	BONCAT_SYTO_Terrestrial_sediment - 4	Microbial enrichment	Nextera XT	24	Strict	None	Single-cell	117592641	30628501	2950898	229025	499	288	103146			0.475897	6	0	1	6
CGHUS	Strict-Dedup-SingleCell	Boncat_Soil	BONCAT_SYTO_Terrestrial_sediment - 4	Microbial enrichment	Nextera XT	24	Strict	Read deduplication	Single-cell	121743756	34951731	3922929	217631	555	308	93755			0.463858	6	0	1	6
CGHUS	Strict-Norm-SingleCell	Boncat_Soil	BONCAT_SYTO_Terrestrial_sediment - 4	Microbial enrichment	Nextera XT	24	Strict	Read normalization	Single-cell	110376322	29512027	2904403	214039	503	287	81629			0.475043	4	0	1	7
CGHUS	Relaxed-None-Meta	Boncat_Soil	BONCAT_SYTO_Terrestrial_sediment - 4	Microbial enrichment	Nextera XT	24	Relaxed	None	Metagenome	160600121	30465981	2963469	335923	458	289	102393			0.521104	4	0	1	7
CGHUS	Relaxed-Dedup-Meta	Boncat_Soil	BONCAT_SYTO_Terrestrial_sediment - 4	Microbial enrichment	Nextera XT	24	Relaxed	Read deduplication	Metagenome	158601968	35751009	2970327	308300	506	301	64989			0.533496	5	0	1	5
CGHUS	Relaxed-Norm-Meta	Boncat_Soil	BONCAT_SYTO_Terrestrial_sediment - 4	Microbial enrichment	Nextera XT	24	Relaxed	Read normalization	Metagenome	147826534	29438535	2528952	306068	470	288	45342			0.53415	5	0	1	4
CGHUS	Relaxed-None-SingleCell	Boncat_Soil	BONCAT_SYTO_Terrestrial_sediment - 4	Microbial enrichment	Nextera XT	24	Relaxed	None	Single-cell	178255671	45819649	4436647	339784	516	293	76083			0.498136	8	0	3	5
CGHUS	Relaxed-Dedup-SingleCell	Boncat_Soil	BONCAT_SYTO_Terrestrial_sediment - 4	Microbial enrichment	Nextera XT	24	Relaxed	Read deduplication	Single-cell	190381656	51176315	5443958	346489	544	307	112507			0.490334	10	0	3	6
CGHUS	Relaxed-Norm-SingleCell	Boncat_Soil	BONCAT_SYTO_Terrestrial_sediment - 4	Microbial enrichment	Nextera XT	24	Relaxed	Read normalization	Single-cell	152294129	42785277	4344605	283214	539	291	80313			0.492462	8	0	3	4
CGHUT	Strict-None-Meta	Boncat_Soil	BONCAT_SYTO_Terrestrial_sediment - 5	Microbial enrichment	Nextera XT	24	Strict	None	Metagenome	120064762	25068116	2083640	253339	447	287	71092			0.50927	5	0	0	6
CGHUT	Strict-Dedup-Meta	Boncat_Soil	BONCAT_SYTO_Terrestrial_sediment - 5	Microbial enrichment	Nextera XT	24	Strict	Read deduplication	Metagenome	118244619	30538255	1842772	221179	533	304	54979			0.522051	4	0	0	7
CGHUT	Strict-Norm-Meta	Boncat_Soil	BONCAT_SYTO_Terrestrial_sediment - 5	Microbial enrichment	Nextera XT	24	Strict	Read normalization	Metagenome	116162672	23636838	1384931	248226	446	285	62627			0.51831	4	0	0	6
CGHUT	Strict-None-SingleCell	Boncat_Soil	BONCAT_SYTO_Terrestrial_sediment - 5	Microbial enrichment	Nextera XT	24	Strict	None	Single-cell	127988900	35087860	3009997	246606	503	288	98539			0.454818	6	0	1	8
CGHUT	Strict-Dedup-SingleCell	Boncat_Soil	BONCAT_SYTO_Terrestrial_sediment - 5	Microbial enrichment	Nextera XT	24	Strict	Read deduplication	Single-cell	131732436	38420562	3980337	235080	553	307	83597			0.450469	6	0	1	7
CGHUT	Strict-Norm-SingleCell	Boncat_Soil	BONCAT_SYTO_Terrestrial_sediment - 5	Microbial enrichment	Nextera XT	24	Strict	Read normalization	Single-cell	119251736	33899034	3004614	227927	510	288	71064			0.450792	5	0	1	7
CGHUT	Relaxed-None-Meta	Boncat_Soil	BONCAT_SYTO_Terrestrial_sediment - 5	Microbial enrichment	Nextera XT	24	Relaxed	None	Metagenome	178296170	35317236	2940198	371030	458	290	64280			0.509459	6	0	1	7
CGHUT	Relaxed-Dedup-Meta	Boncat_Soil	BONCAT_SYTO_Terrestrial_sediment - 5	Microbial enrichment	Nextera XT	24	Relaxed	Read deduplication	Metagenome	189127701	45642426	2950506	356510	531	305	62074			0.530917	6	0	1	7
CGHUT	Relaxed-Norm-Meta	Boncat_Soil	BONCAT_SYTO_Terrestrial_sediment - 5	Microbial enrichment	Nextera XT	24	Relaxed	Read normalization	Metagenome	161806349	33865233	2327610	333701	472	288	44438			0.528344	7	0	1	5
CGHUT	Relaxed-None-SingleCell	Boncat_Soil	BONCAT_SYTO_Terrestrial_sediment - 5	Microbial enrichment	Nextera XT	24	Relaxed	None	Single-cell	199570420	51801636	4700224	379078	516	294	101234			0.487152	9	0	4	6
CGHUT	Relaxed-Dedup-SingleCell	Boncat_Soil	BONCAT_SYTO_Terrestrial_sediment - 5	Microbial enrichment	Nextera XT	24	Relaxed	Read deduplication	Single-cell	212279245	56576613	5971985	386755	542	307	123138			0.471951	12	0	4	7
CGHUT	Relaxed-Norm-SingleCell	Boncat_Soil	BONCAT_SYTO_Terrestrial_sediment - 5	Microbial enrichment	Nextera XT	24	Relaxed	Read normalization	Single-cell	166996248	48229448	4465207	308278	542	291	101264			0.472861	8	0	2	8
CGHUU	Strict-None-Meta	Boncat_Soil	BONCAT_SYTO_Terrestrial_sediment - 6	Microbial enrichment	Nextera XT	24	Strict	None	Metagenome	130641078	27860538	2087207	275247	453	286	74091			0.514898	5	0	0	8
CGHUU	Strict-Dedup-Meta	Boncat_Soil	BONCAT_SYTO_Terrestrial_sediment - 6	Microbial enrichment	Nextera XT	24	Strict	Read deduplication	Metagenome	126970080	33725273	2322947	236775	535	303	97956			0.518388	5	0	0	8
CGHUU	Strict-Norm-Meta	Boncat_Soil	BONCAT_SYTO_Terrestrial_sediment - 6	Microbial enrichment	Nextera XT	24	Strict	Read normalization	Metagenome	123589298	27232008	2059648	258990	457	286	74091			0.511114	5	0	0	7
CGHUU	Strict-None-SingleCell	Boncat_Soil	BONCAT_SYTO_Terrestrial_sediment - 6	Microbial enrichment	Nextera XT	24	Strict	None	Single-cell	134548613	39397872	4189541	253010	517	289	136243			0.436761	6	0	1	9
CGHUU	Strict-Dedup-SingleCell	Boncat_Soil	BONCAT_SYTO_Terrestrial_sediment - 6	Microbial enrichment	Nextera XT	24	Strict	Read deduplication	Single-cell	140887236	43119974	5626198	247836	560	308	169426			0.431797	7	0	2	8
CGHUU	Strict-Norm-SingleCell	Boncat_Soil	BONCAT_SYTO_Terrestrial_sediment - 6	Microbial enrichment	Nextera XT	24	Strict	Read normalization	Single-cell	125904268	38344033	4170143	234226	526	289	86036			0.432754	5	0	1	8
CGHUU	Relaxed-None-Meta	Boncat_Soil	BONCAT_SYTO_Terrestrial_sediment - 6	Microbial enrichment	Nextera XT	24	Relaxed	None	Metagenome	183447417	39240486	3360769	376675	462	290	117714			0.502591	5	0	1	10
CGHUU	Relaxed-Dedup-Meta	Boncat_Soil	BONCAT_SYTO_Terrestrial_sediment - 6	Microbial enrichment	Nextera XT	24	Relaxed	Read deduplication	Metagenome	197047788	48262706	3536351	372244	527	304	80130			0.531888	7	0	1	9
CGHUU	Relaxed-Norm-Meta	Boncat_Soil	BONCAT_SYTO_Terrestrial_sediment - 6	Microbial enrichment	Nextera XT	24	Relaxed	Read normalization	Metagenome	168431782	37246542	3030805	344599	475	289	74091			0.52498	6	0	1	8
CGHUU	Relaxed-None-SingleCell	Boncat_Soil	BONCAT_SYTO_Terrestrial_sediment - 6	Microbial enrichment	Nextera XT	24	Relaxed	None	Single-cell	204178854	55151377	5795678	383953	518	295	133852			0.463299	8	0	3	9
CGHUU	Relaxed-Dedup-SingleCell	Boncat_Soil	BONCAT_SYTO_Terrestrial_sediment - 6	Microbial enrichment	Nextera XT	24	Relaxed	Read deduplication	Single-cell	220866677	60617622	7192185	400256	541	307	207017			0.464747	12	0	4	8
CGHUU	Relaxed-Norm-SingleCell	Boncat_Soil	BONCAT_SYTO_Terrestrial_sediment - 6	Microbial enrichment	Nextera XT	24	Relaxed	Read normalization	Single-cell	172546609	51969438	5840031	314438	546	293	133852			0.45351	7	0	4	7
CGHUW	Strict-None-Meta	Boncat_Soil	BONCAT_SYTO_Terrestrial_sediment - 7	Microbial enrichment	Nextera XT	24	Strict	None	Metagenome	112264389	13745413	212354	269188	386	284	34458			0.571904	3	0	0	3
CGHUW	Strict-Dedup-Meta	Boncat_Soil	BONCAT_SYTO_Terrestrial_sediment - 7	Microbial enrichment	Nextera XT	24	Strict	Read deduplication	Metagenome	117757546	18183270	139175	247073	463	300	33305			0.615304	5	0	0	3
CGHUW	Strict-Norm-Meta	Boncat_Soil	BONCAT_SYTO_Terrestrial_sediment - 7	Microbial enrichment	Nextera XT	24	Strict	Read normalization	Metagenome	110201617	12905687	150379	266850	386	283	34458			0.601535	3	0	0	2
CGHUW	Strict-None-SingleCell	Boncat_Soil	BONCAT_SYTO_Terrestrial_sediment - 7	Microbial enrichment	Nextera XT	24	Strict	None	Single-cell	117850866	18155813	1068486	267835	409	285	34458			0.536025	5	0	1	2
CGHUW	Strict-Dedup-SingleCell	Boncat_Soil	BONCAT_SYTO_Terrestrial_sediment - 7	Microbial enrichment	Nextera XT	24	Strict	Read deduplication	Single-cell	134984213	22023508	2151327	281070	460	300	54709			0.535863	5	1	0	4
CGHUW	Strict-Norm-SingleCell	Boncat_Soil	BONCAT_SYTO_Terrestrial_sediment - 7	Microbial enrichment	Nextera XT	24	Strict	Read normalization	Single-cell	112811933	17572900	1036486	257076	407	284	34458			0.532522	5	0	1	2
CGHUW	Relaxed-None-Meta	Boncat_Soil	BONCAT_SYTO_Terrestrial_sediment - 7	Microbial enrichment	Nextera XT	24	Relaxed	None	Metagenome	147254448	18807567	597450	343103	400	285	30669			0.571418	5	0	2	1
CGHUW	Relaxed-Dedup-Meta	Boncat_Soil	BONCAT_SYTO_Terrestrial_sediment - 7	Microbial enrichment	Nextera XT	24	Relaxed	Read deduplication	Metagenome	162681695	26179923	570295	336882	470	301	33305			0.611002	5	0	1	3
CGHUW	Relaxed-Norm-Meta	Boncat_Soil	BONCAT_SYTO_Terrestrial_sediment - 7	Microbial enrichment	Nextera XT	24	Relaxed	Read normalization	Metagenome	139456225	18153180	508671	324574	404	285	34458			0.59536	5	0	1	2
CGHUW	Relaxed-None-SingleCell	Boncat_Soil	BONCAT_SYTO_Terrestrial_sediment - 7	Microbial enrichment	Nextera XT	24	Relaxed	None	Single-cell	159808396	26459463	1724246	350093	430	286	30669			0.555739	6	0	2	3
CGHUW	Relaxed-Dedup-SingleCell	Boncat_Soil	BONCAT_SYTO_Terrestrial_sediment - 7	Microbial enrichment	Nextera XT	24	Relaxed	Read deduplication	Single-cell	184698245	31279757	2873959	381353	465	300	55889			0.54921	8	1	1	3
CGHUW	Relaxed-Norm-SingleCell	Boncat_Soil	BONCAT_SYTO_Terrestrial_sediment - 7	Microbial enrichment	Nextera XT	24	Relaxed	Read normalization	Single-cell	143162703	25100860	1705648	312015	432	286	30669			0.540438	7	0	2	3
CGHUX	Strict-None-Meta	Boncat_Soil	BONCAT_SYTO_Terrestrial_sediment - 8	Microbial enrichment	Nextera XT	24	Strict	None	Metagenome	58578692	4335768	34589	151425	360	283	20313			0.611996	1	0	0	1
CGHUX	Strict-Dedup-Meta	Boncat_Soil	BONCAT_SYTO_Terrestrial_sediment - 8	Microbial enrichment	Nextera XT	24	Strict	Read deduplication	Metagenome	57308525	5464760	44614	133725	405	291	20313			0.604869	1	0	0	1
CGHUX	Strict-Norm-Meta	Boncat_Soil	BONCAT_SYTO_Terrestrial_sediment - 8	Microbial enrichment	Nextera XT	24	Strict	Read normalization	Metagenome	56515019	4239843	34511	146418	358	282	20313			0.610421	1	0	0	1
CGHUX	Strict-None-SingleCell	Boncat_Soil	BONCAT_SYTO_Terrestrial_sediment - 8	Microbial enrichment	Nextera XT	24	Strict	None	Single-cell	61566170	6217282	233565	151897	375	283	20354			0.505461	1	0	1	0
CGHUX	Strict-Dedup-SingleCell	Boncat_Soil	BONCAT_SYTO_Terrestrial_sediment - 8	Microbial enrichment	Nextera XT	24	Strict	Read deduplication	Single-cell	72755055	7671520	920936	163665	423	295	24755			0.504209	1	0	1	0
CGHUX	Strict-Norm-SingleCell	Boncat_Soil	BONCAT_SYTO_Terrestrial_sediment - 8	Microbial enrichment	Nextera XT	24	Strict	Read normalization	Single-cell	59185805	6044140	246248	146426	374	283	20313			0.498132	1	0	1	0
CGHUX	Relaxed-None-Meta	Boncat_Soil	BONCAT_SYTO_Terrestrial_sediment - 8	Microbial enrichment	Nextera XT	24	Relaxed	None	Metagenome	77208900	6266723	49726	193024	375	284	20313			0.615433	1	0	0	1
CGHUX	Relaxed-Dedup-Meta	Boncat_Soil	BONCAT_SYTO_Terrestrial_sediment - 8	Microbial enrichment	Nextera XT	24	Relaxed	Read deduplication	Metagenome	78329315	7583607	47988	180514	414	292	20313			0.624716	2	0	0	1
CGHUX	Relaxed-Norm-Meta	Boncat_Soil	BONCAT_SYTO_Terrestrial_sediment - 8	Microbial enrichment	Nextera XT	24	Relaxed	Read normalization	Metagenome	70392764	6002908	49726	176115	373	284	20313			0.612694	1	0	0	1
CGHUX	Relaxed-None-SingleCell	Boncat_Soil	BONCAT_SYTO_Terrestrial_sediment - 8	Microbial enrichment	Nextera XT	24	Relaxed	None	Single-cell	84604485	9191536	470936	201034	394	285	20313			0.539698	2	0	1	0
CGHUX	Relaxed-Dedup-SingleCell	Boncat_Soil	BONCAT_SYTO_Terrestrial_sediment - 8	Microbial enrichment	Nextera XT	24	Relaxed	Read deduplication	Single-cell	101284382	11114520	1496244	225059	431	296	33768			0.541218	2	0	1	1
CGHUX	Relaxed-Norm-SingleCell	Boncat_Soil	BONCAT_SYTO_Terrestrial_sediment - 8	Microbial enrichment	Nextera XT	24	Relaxed	Read normalization	Single-cell	74835900	8653230	476622	177865	392	284	20313			0.525312	2	0	1	0
CGHUY	Strict-None-Meta	Boncat_Soil	BONCAT_SYTO_Terrestrial_sediment - 9	Microbial enrichment	Nextera XT	24	Strict	None	Metagenome	173452363	20200372	486700	414207	393	284	55624			0.604763	4	0	0	4
CGHUY	Strict-Dedup-Meta	Boncat_Soil	BONCAT_SYTO_Terrestrial_sediment - 9	Microbial enrichment	Nextera XT	24	Strict	Read deduplication	Metagenome	173490308	27731784	531187	362052	467	299	50127			0.622694	6	0	0	4
CGHUY	Strict-Norm-Meta	Boncat_Soil	BONCAT_SYTO_Terrestrial_sediment - 9	Microbial enrichment	Nextera XT	24	Strict	Read normalization	Metagenome	170828315	19929121	466575	408339	393	284	55624			0.602507	5	0	0	4
CGHUY	Strict-None-SingleCell	Boncat_Soil	BONCAT_SYTO_Terrestrial_sediment - 9	Microbial enrichment	Nextera XT	24	Strict	None	Single-cell	171529148	27329966	1267625	384369	417	285	50124			0.553114	5	0	1	3
CGHUY	Strict-Dedup-SingleCell	Boncat_Soil	BONCAT_SYTO_Terrestrial_sediment - 9	Microbial enrichment	Nextera XT	24	Strict	Read deduplication	Single-cell	197633520	36170768	2615232	402088	475	300	50124			0.566961	7	1	1	3
CGHUY	Strict-Norm-SingleCell	Boncat_Soil	BONCAT_SYTO_Terrestrial_sediment - 9	Microbial enrichment	Nextera XT	24	Strict	Read normalization	Single-cell	168775715	26888302	1264250	378735	416	285	50124			0.54971	5	0	1	3
CGHUY	Relaxed-None-Meta	Boncat_Soil	BONCAT_SYTO_Terrestrial_sediment - 9	Microbial enrichment	Nextera XT	24	Relaxed	None	Metagenome	201935502	25135000	852341	472070	403	285	50127			0.608037	5	0	1	3
CGHUY	Relaxed-Dedup-Meta	Boncat_Soil	BONCAT_SYTO_Terrestrial_sediment - 9	Microbial enrichment	Nextera XT	24	Relaxed	Read deduplication	Metagenome	203890052	34051719	919423	420886	472	300	50117			0.61702	8	0	1	3
CGHUY	Relaxed-Norm-Meta	Boncat_Soil	BONCAT_SYTO_Terrestrial_sediment - 9	Microbial enrichment	Nextera XT	24	Relaxed	Read normalization	Metagenome	194484365	24623680	793818	454212	404	285	50127			0.608002	6	0	1	3
CGHUY	Relaxed-None-SingleCell	Boncat_Soil	BONCAT_SYTO_Terrestrial_sediment - 9	Microbial enrichment	Nextera XT	24	Relaxed	None	Single-cell	201242602	34259950	2034118	439797	430	287	50124			0.562195	7	0	3	2
CGHUY	Relaxed-Dedup-SingleCell	Boncat_Soil	BONCAT_SYTO_Terrestrial_sediment - 9	Microbial enrichment	Nextera XT	24	Relaxed	Read deduplication	Single-cell	232346233	43841541	3358394	469636	479	300	50124			0.576781	8	1	2	3
CGHUY	Relaxed-Norm-SingleCell	Boncat_Soil	BONCAT_SYTO_Terrestrial_sediment - 9	Microbial enrichment	Nextera XT	24	Relaxed	Read normalization	Single-cell	191723646	33238722	1937916	419196	429	286	50124			0.563084	8	0	3	1
CGHUZ	Strict-None-Meta	Boncat_Soil	BONCAT_SYTO_Terrestrial_sediment - 10	Microbial enrichment	Nextera XT	24	Strict	None	Metagenome	176169739	19747562	1862884	418676	395	284	37478			0.556798	4	0	1	1
CGHUZ	Strict-Dedup-Meta	Boncat_Soil	BONCAT_SYTO_Terrestrial_sediment - 10	Microbial enrichment	Nextera XT	24	Strict	Read deduplication	Metagenome	185159265	30965235	1797752	379061	476	302	37478			0.60093	6	0	1	2
CGHUZ	Strict-Norm-Meta	Boncat_Soil	BONCAT_SYTO_Terrestrial_sediment - 10	Microbial enrichment	Nextera XT	24	Strict	Read normalization	Metagenome	167903469	19218903	1772660	399122	394	284	37478			0.553379	4	0	1	1
CGHUZ	Strict-None-SingleCell	Boncat_Soil	BONCAT_SYTO_Terrestrial_sediment - 10	Microbial enrichment	Nextera XT	24	Strict	None	Single-cell	185718787	31868170	2326309	406804	430	286	40550			0.560048	7	0	2	2
CGHUZ	Strict-Dedup-SingleCell	Boncat_Soil	BONCAT_SYTO_Terrestrial_sediment - 10	Microbial enrichment	Nextera XT	24	Strict	Read deduplication	Single-cell	212628646	41137136	2500248	427012	480	303	40550			0.558577	9	0	2	5
CGHUZ	Strict-Norm-SingleCell	Boncat_Soil	BONCAT_SYTO_Terrestrial_sediment - 10	Microbial enrichment	Nextera XT	24	Strict	Read normalization	Single-cell	175510099	30581178	2216868	384617	430	285	40550			0.558732	6	0	1	3
CGHUZ	Relaxed-None-Meta	Boncat_Soil	BONCAT_SYTO_Terrestrial_sediment - 10	Microbial enrichment	Nextera XT	24	Relaxed	None	Metagenome	267387589	32040577	3858963	611043	416	287	42056			0.586305	8	1	0	3
CGHUZ	Relaxed-Dedup-Meta	Boncat_Soil	BONCAT_SYTO_Terrestrial_sediment - 10	Microbial enrichment	Nextera XT	24	Relaxed	Read deduplication	Metagenome	290292648	49150355	3852965	592244	479	302	42056			0.600078	11	1	0	6
CGHUZ	Relaxed-Norm-Meta	Boncat_Soil	BONCAT_SYTO_Terrestrial_sediment - 10	Microbial enrichment	Nextera XT	24	Relaxed	Read normalization	Metagenome	232980995	30539112	3594627	528210	419	286	42056			0.585669	7	1	0	4
CGHUZ	Relaxed-None-SingleCell	Boncat_Soil	BONCAT_SYTO_Terrestrial_sediment - 10	Microbial enrichment	Nextera XT	24	Relaxed	None	Single-cell	286260719	51892217	4614571	606149	450	289	40550			0.561343	9	1	1	6
CGHUZ	Relaxed-Dedup-SingleCell	Boncat_Soil	BONCAT_SYTO_Terrestrial_sediment - 10	Microbial enrichment	Nextera XT	24	Relaxed	Read deduplication	Single-cell	332433270	63738944	5033687	669019	479	302	40550			0.556998	15	1	1	8
CGHUZ	Relaxed-Norm-SingleCell	Boncat_Soil	BONCAT_SYTO_Terrestrial_sediment - 10	Microbial enrichment	Nextera XT	24	Relaxed	Read normalization	Single-cell	243315697	49379699	4415156	505269	463	288	40550			0.561564	9	1	1	6
CGHWA	Strict-None-Meta	Boncat_Soil	BONCAT_SYTO_Terrestrial_sediment - 11	Microbial enrichment	Nextera XT	24	Strict	None	Metagenome	113171014	6457140	40176	285958	377	284	14762			0.663325	1	0	0	1
CGHWA	Strict-Dedup-Meta	Boncat_Soil	BONCAT_SYTO_Terrestrial_sediment - 11	Microbial enrichment	Nextera XT	24	Strict	Read deduplication	Metagenome	122415955	13012051	43303	269364	443	299	17889			0.667964	3	0	0	1
CGHWA	Strict-Norm-Meta	Boncat_Soil	BONCAT_SYTO_Terrestrial_sediment - 11	Microbial enrichment	Nextera XT	24	Strict	Read normalization	Metagenome	103986455	6013889	40176	264000	374	284	14762			0.66009	1	0	0	1
CGHWA	Strict-None-SingleCell	Boncat_Soil	BONCAT_SYTO_Terrestrial_sediment - 11	Microbial enrichment	Nextera XT	24	Strict	None	Single-cell	122921160	13499209	119675	288084	404	286	17889			0.598412	4	0	1	1
CGHWA	Strict-Dedup-SingleCell	Boncat_Soil	BONCAT_SYTO_Terrestrial_sediment - 11	Microbial enrichment	Nextera XT	24	Strict	Read deduplication	Single-cell	142028697	18556198	203036	307814	444	299	17889			0.598551	5	0	1	2
CGHWA	Strict-Norm-SingleCell	Boncat_Soil	BONCAT_SYTO_Terrestrial_sediment - 11	Microbial enrichment	Nextera XT	24	Strict	Read normalization	Single-cell	111224239	12414344	90391	261657	402	285	17889			0.593866	5	0	1	1
CGHWA	Relaxed-None-Meta	Boncat_Soil	BONCAT_SYTO_Terrestrial_sediment - 11	Microbial enrichment	Nextera XT	24	Relaxed	None	Metagenome	183475557	12859367	64185	445100	393	287	21887			0.660969	4	0	0	1
CGHWA	Relaxed-Dedup-Meta	Boncat_Soil	BONCAT_SYTO_Terrestrial_sediment - 11	Microbial enrichment	Nextera XT	24	Relaxed	Read deduplication	Metagenome	216570438	25772615	76441	465534	457	301	21887			0.661514	5	0	0	3
CGHWA	Relaxed-Norm-Meta	Boncat_Soil	BONCAT_SYTO_Terrestrial_sediment - 11	Microbial enrichment	Nextera XT	24	Relaxed	Read normalization	Metagenome	159686515	12963412	80647	380683	403	286	21887			0.669753	4	0	0	1
CGHWA	Relaxed-None-SingleCell	Boncat_Soil	BONCAT_SYTO_Terrestrial_sediment - 11	Microbial enrichment	Nextera XT	24	Relaxed	None	Single-cell	214292446	27522785	444031	477611	430	289	21887			0.613935	5	0	1	3
CGHWA	Relaxed-Dedup-SingleCell	Boncat_Soil	BONCAT_SYTO_Terrestrial_sediment - 11	Microbial enrichment	Nextera XT	24	Relaxed	Read deduplication	Single-cell	247266945	34277951	929468	527776	452	300	25777			0.593433	8	0	0	6
CGHWA	Relaxed-Norm-SingleCell	Boncat_Soil	BONCAT_SYTO_Terrestrial_sediment - 11	Microbial enrichment	Nextera XT	24	Relaxed	Read normalization	Single-cell	169654366	24626817	456090	373843	436	288	21887			0.603341	6	0	1	3
CGHWB	Strict-None-Meta	Boncat_Soil	BONCAT_SYTO_Terrestrial_sediment - 12	Microbial enrichment	Nextera XT	24	Strict	None	Metagenome	180108874	12782907		448100	382	284	7723			0.669421	5	0	0	2
CGHWB	Strict-Dedup-Meta	Boncat_Soil	BONCAT_SYTO_Terrestrial_sediment - 12	Microbial enrichment	Nextera XT	24	Strict	Read deduplication	Metagenome	190231397	24718045		406902	458	300	8716			0.664915	6	0	0	4
CGHWB	Strict-Norm-Meta	Boncat_Soil	BONCAT_SYTO_Terrestrial_sediment - 12	Microbial enrichment	Nextera XT	24	Strict	Read normalization	Metagenome	172262053	12345273		429304	381	284	7723			0.66646	4	0	0	2
CGHWB	Strict-None-SingleCell	Boncat_Soil	BONCAT_SYTO_Terrestrial_sediment - 12	Microbial enrichment	Nextera XT	24	Strict	None	Single-cell	187657060	25263529	294591	430012	412	285	17204			0.603126	9	0	1	4
CGHWB	Strict-Dedup-SingleCell	Boncat_Soil	BONCAT_SYTO_Terrestrial_sediment - 12	Microbial enrichment	Nextera XT	24	Strict	Read deduplication	Single-cell	218979926	35658063	1038364	456398	463	301	29554			0.59065	11	0	0	5
CGHWB	Strict-Norm-SingleCell	Boncat_Soil	BONCAT_SYTO_Terrestrial_sediment - 12	Microbial enrichment	Nextera XT	24	Strict	Read normalization	Single-cell	178129819	24195936	292805	409131	410	285	19098			0.596641	6	0	1	4
CGHWB	Relaxed-None-Meta	Boncat_Soil	BONCAT_SYTO_Terrestrial_sediment - 12	Microbial enrichment	Nextera XT	24	Relaxed	None	Metagenome	265432815	23133152		630643	404	287	8965			0.652605	6	0	0	3
CGHWB	Relaxed-Dedup-Meta	Boncat_Soil	BONCAT_SYTO_Terrestrial_sediment - 12	Microbial enrichment	Nextera XT	24	Relaxed	Read deduplication	Metagenome	288900460	40186509		609323	466	301	9493			0.65573	9	0	0	5
CGHWB	Relaxed-Norm-Meta	Boncat_Soil	BONCAT_SYTO_Terrestrial_sediment - 12	Microbial enrichment	Nextera XT	24	Relaxed	Read normalization	Metagenome	235288563	22006944		557971	404	286	8965			0.656871	7	0	0	3
CGHWB	Relaxed-None-SingleCell	Boncat_Soil	BONCAT_SYTO_Terrestrial_sediment - 12	Microbial enrichment	Nextera XT	24	Relaxed	None	Single-cell	280163459	42172162	662430	616037	434	288	19736			0.60144	10	0	1	5
CGHWB	Relaxed-Dedup-SingleCell	Boncat_Soil	BONCAT_SYTO_Terrestrial_sediment - 12	Microbial enrichment	Nextera XT	24	Relaxed	Read deduplication	Single-cell	330500735	55578377	1711706	683123	468	301	43992			0.584876	11	1	0	6
CGHWB	Relaxed-Norm-SingleCell	Boncat_Soil	BONCAT_SYTO_Terrestrial_sediment - 12	Microbial enrichment	Nextera XT	24	Relaxed	Read normalization	Single-cell	243585996	40372795	684179	529362	440	287	19736			0.594651	11	0	1	6
CGHWC	Strict-None-Meta	Boncat_Soil	BONCAT_SYTO_Terrestrial_sediment - 13	Microbial enrichment	Nextera XT	24	Strict	None	Metagenome	99819219	14578106	118973	228641	409	285	50894			0.610392	4	0	0	3
CGHWC	Strict-Dedup-Meta	Boncat_Soil	BONCAT_SYTO_Terrestrial_sediment - 13	Microbial enrichment	Nextera XT	24	Strict	Read deduplication	Metagenome	104197083	18781297	112559	212900	479	301	50894			0.620068	5	0	0	4
CGHWC	Strict-Norm-Meta	Boncat_Soil	BONCAT_SYTO_Terrestrial_sediment - 13	Microbial enrichment	Nextera XT	24	Strict	Read normalization	Metagenome	94251398	13815273	108805	216470	411	284	50894			0.62568	3	0	0	3
CGHWC	Strict-None-SingleCell	Boncat_Soil	BONCAT_SYTO_Terrestrial_sediment - 13	Microbial enrichment	Nextera XT	24	Strict	None	Single-cell	107764739	20489491	574134	231594	440	286	50894			0.56607	5	0	1	3
CGHWC	Strict-Dedup-SingleCell	Boncat_Soil	BONCAT_SYTO_Terrestrial_sediment - 13	Microbial enrichment	Nextera XT	24	Strict	Read deduplication	Single-cell	119139546	23106610	989147	241414	473	301	50894			0.546061	6	0	1	3
CGHWC	Strict-Norm-SingleCell	Boncat_Soil	BONCAT_SYTO_Terrestrial_sediment - 13	Microbial enrichment	Nextera XT	24	Strict	Read normalization	Single-cell	98985213	19487908	573681	212320	441	286	50894			0.557813	4	0	1	3
CGHWC	Relaxed-None-Meta	Boncat_Soil	BONCAT_SYTO_Terrestrial_sediment - 13	Microbial enrichment	Nextera XT	24	Relaxed	None	Metagenome	158464082	24398086	182267	353254	422	288	53061			0.602876	6	0	1	5
CGHWC	Relaxed-Dedup-Meta	Boncat_Soil	BONCAT_SYTO_Terrestrial_sediment - 13	Microbial enrichment	Nextera XT	24	Relaxed	Read deduplication	Metagenome	179080304	32869635	173712	362705	483	302	51377			0.606569	8	0	0	7
CGHWC	Relaxed-Norm-Meta	Boncat_Soil	BONCAT_SYTO_Terrestrial_sediment - 13	Microbial enrichment	Nextera XT	24	Relaxed	Read normalization	Metagenome	138496104	23677857	129113	301933	439	287	51377			0.612039	5	0	0	6
CGHWC	Relaxed-None-SingleCell	Boncat_Soil	BONCAT_SYTO_Terrestrial_sediment - 13	Microbial enrichment	Nextera XT	24	Relaxed	None	Single-cell	181286170	35071914	1274832	378392	456	290	54649			0.562964	9	0	2	4
CGHWC	Relaxed-Dedup-SingleCell	Boncat_Soil	BONCAT_SYTO_Terrestrial_sediment - 13	Microbial enrichment	Nextera XT	24	Relaxed	Read deduplication	Single-cell	204136617	38828847	2238486	413306	474	301	54649			0.553713	10	1	1	4
CGHWC	Relaxed-Norm-SingleCell	Boncat_Soil	BONCAT_SYTO_Terrestrial_sediment - 13	Microbial enrichment	Nextera XT	24	Relaxed	Read normalization	Single-cell	145488255	32297864	1219027	296201	473	288	54649			0.552477	9	0	2	4
CGHWG	Strict-None-Meta	Boncat_Soil	BONCAT_SYTO_Terrestrial_sediment - 14	Microbial enrichment	Nextera XT	24	Strict	None	Metagenome	101789138	19836410	530718	220018	434	286	50663			0.552334	3	0	1	2
CGHWG	Strict-Dedup-Meta	Boncat_Soil	BONCAT_SYTO_Terrestrial_sediment - 14	Microbial enrichment	Nextera XT	24	Strict	Read deduplication	Metagenome	104431287	24031936	616537	202147	504	303	27708			0.560238	6	0	1	4
CGHWG	Strict-Norm-Meta	Boncat_Soil	BONCAT_SYTO_Terrestrial_sediment - 14	Microbial enrichment	Nextera XT	24	Strict	Read normalization	Metagenome	93988778	19197318	503733	201768	438	285	50663			0.547841	3	0	1	2
CGHWG	Strict-None-SingleCell	Boncat_Soil	BONCAT_SYTO_Terrestrial_sediment - 14	Microbial enrichment	Nextera XT	24	Strict	None	Single-cell	109050360	26437532	1076694	220223	468	287	50663			0.50821	6	0	2	3
CGHWG	Strict-Dedup-SingleCell	Boncat_Soil	BONCAT_SYTO_Terrestrial_sediment - 14	Microbial enrichment	Nextera XT	24	Strict	Read deduplication	Single-cell	119406558	28725260	1375084	229674	496	303	30234			0.509601	6	0	2	3
CGHWG	Strict-Norm-SingleCell	Boncat_Soil	BONCAT_SYTO_Terrestrial_sediment - 14	Microbial enrichment	Nextera XT	24	Strict	Read normalization	Single-cell	99041013	25332585	1040166	197914	476	287	50663			0.502376	7	0	2	3
CGHWG	Relaxed-None-Meta	Boncat_Soil	BONCAT_SYTO_Terrestrial_sediment - 14	Microbial enrichment	Nextera XT	24	Relaxed	None	Metagenome	172363560	30176180	1554990	372320	433	289	50889			0.548649	7	0	2	3
CGHWG	Relaxed-Dedup-Meta	Boncat_Soil	BONCAT_SYTO_Terrestrial_sediment - 14	Microbial enrichment	Nextera XT	24	Relaxed	Read deduplication	Metagenome	196686725	40132434	2430656	387453	494	304	50889			0.571678	10	0	2	6
CGHWG	Relaxed-Norm-Meta	Boncat_Soil	BONCAT_SYTO_Terrestrial_sediment - 14	Microbial enrichment	Nextera XT	24	Relaxed	Read normalization	Metagenome	146422481	29862133	1882558	303973	461	288	50889			0.560695	7	0	2	3
CGHWG	Relaxed-None-SingleCell	Boncat_Soil	BONCAT_SYTO_Terrestrial_sediment - 14	Microbial enrichment	Nextera XT	24	Relaxed	None	Single-cell	201704514	43348889	3695570	407486	469	292	50889			0.522926	9	0	3	5
CGHWG	Relaxed-Dedup-SingleCell	Boncat_Soil	BONCAT_SYTO_Terrestrial_sediment - 14	Microbial enrichment	Nextera XT	24	Relaxed	Read deduplication	Single-cell	224629240	47358539	4470460	442954	484	303	50889			0.519597	12	0	5	3
CGHWG	Relaxed-Norm-SingleCell	Boncat_Soil	BONCAT_SYTO_Terrestrial_sediment - 14	Microbial enrichment	Nextera XT	24	Relaxed	Read normalization	Single-cell	154617629	39989527	3513528	297837	505	290	50889			0.507842	8	0	3	5
CGHWH	Strict-None-Meta	Boncat_Soil	BONCAT_SYTO_Terrestrial_sediment - 15	Microbial enrichment	Nextera XT	24	Strict	None	Metagenome	67837509	4652359		172155	370	283	7032			0.663092	1	0	0	1
CGHWH	Strict-Dedup-Meta	Boncat_Soil	BONCAT_SYTO_Terrestrial_sediment - 15	Microbial enrichment	Nextera XT	24	Strict	Read deduplication	Metagenome	66585429	6492582	10929	153818	412	292	10929			0.653358	1	0	0	1
CGHWH	Strict-Norm-Meta	Boncat_Soil	BONCAT_SYTO_Terrestrial_sediment - 15	Microbial enrichment	Nextera XT	24	Strict	Read normalization	Metagenome	66739565	4518848		170151	369	283	7776			0.672524	1	0	0	1
CGHWH	Strict-None-SingleCell	Boncat_Soil	BONCAT_SYTO_Terrestrial_sediment - 15	Microbial enrichment	Nextera XT	24	Strict	None	Single-cell	70160534	7512672	40337	169592	386	284	16429			0.59617	1	0	0	1
CGHWH	Strict-Dedup-SingleCell	Boncat_Soil	BONCAT_SYTO_Terrestrial_sediment - 15	Microbial enrichment	Nextera XT	24	Strict	Read deduplication	Single-cell	83431343	9856677	216555	185101	431	295	20619			0.5791	3	0	1	1
CGHWH	Strict-Norm-SingleCell	Boncat_Soil	BONCAT_SYTO_Terrestrial_sediment - 15	Microbial enrichment	Nextera XT	24	Strict	Read normalization	Single-cell	67861445	7303997	40320	164368	385	284	16412			0.596734	1	0	0	1
CGHWH	Relaxed-None-Meta	Boncat_Soil	BONCAT_SYTO_Terrestrial_sediment - 15	Microbial enrichment	Nextera XT	24	Relaxed	None	Metagenome	84876881	6877041		209689	381	284	8489			0.654962	2	0	0	1
CGHWH	Relaxed-Dedup-Meta	Boncat_Soil	BONCAT_SYTO_Terrestrial_sediment - 15	Microbial enrichment	Nextera XT	24	Relaxed	Read deduplication	Metagenome	84850413	8660898		194343	416	293	8421			0.656633	2	0	0	1
CGHWH	Relaxed-Norm-Meta	Boncat_Soil	BONCAT_SYTO_Terrestrial_sediment - 15	Microbial enrichment	Nextera XT	24	Relaxed	Read normalization	Metagenome	79177967	6601455		195653	380	284	8433			0.655517	2	0	0	0
CGHWH	Relaxed-None-SingleCell	Boncat_Soil	BONCAT_SYTO_Terrestrial_sediment - 15	Microbial enrichment	Nextera XT	24	Relaxed	None	Single-cell	90580730	11035147	95027	211826	400	285	16047			0.593564	3	0	0	1
CGHWH	Relaxed-Dedup-SingleCell	Boncat_Soil	BONCAT_SYTO_Terrestrial_sediment - 15	Microbial enrichment	Nextera XT	24	Relaxed	Read deduplication	Single-cell	108088118	13732256	487427	237370	435	296	30731			0.577441	4	0	1	2
CGHWH	Relaxed-Norm-SingleCell	Boncat_Soil	BONCAT_SYTO_Terrestrial_sediment - 15	Microbial enrichment	Nextera XT	24	Relaxed	Read normalization	Single-cell	82798670	10483670	100454	193491	400	285	15163			0.588235	3	0	1	1
CGHWN	Strict-None-Meta	Boncat_Soil	BONCAT_SYTO_Terrestrial_sediment - 16	Microbial enrichment	Nextera XT	24	Strict	None	Metagenome	120917285	10204250	73827	296030	387	284	41132			0.643904	3	0	0	2
CGHWN	Strict-Dedup-Meta	Boncat_Soil	BONCAT_SYTO_Terrestrial_sediment - 16	Microbial enrichment	Nextera XT	24	Strict	Read deduplication	Metagenome	127133806	17059287	81242	271696	457	300	41132			0.661066	5	0	0	3
CGHWN	Strict-Norm-Meta	Boncat_Soil	BONCAT_SYTO_Terrestrial_sediment - 16	Microbial enrichment	Nextera XT	24	Strict	Read normalization	Metagenome	113458778	9768361	73781	278318	386	284	41132			0.642926	3	0	0	2
CGHWN	Strict-None-SingleCell	Boncat_Soil	BONCAT_SYTO_Terrestrial_sediment - 16	Microbial enrichment	Nextera XT	24	Strict	None	Single-cell	128636419	16967440	102226	294257	415	286	41132			0.628478	4	0	0	3
CGHWN	Strict-Dedup-SingleCell	Boncat_Soil	BONCAT_SYTO_Terrestrial_sediment - 16	Microbial enrichment	Nextera XT	24	Strict	Read deduplication	Single-cell	147045232	23277664	135104	309785	457	300	41132			0.621278	6	0	0	4
CGHWN	Strict-Norm-SingleCell	Boncat_Soil	BONCAT_SYTO_Terrestrial_sediment - 16	Microbial enrichment	Nextera XT	24	Strict	Read normalization	Single-cell	119886447	16249481	102180	273937	415	285	41132			0.62976	4	0	0	3
CGHWN	Relaxed-None-Meta	Boncat_Soil	BONCAT_SYTO_Terrestrial_sediment - 16	Microbial enrichment	Nextera XT	24	Relaxed	None	Metagenome	187570273	18553377	191768	441884	402	287	41132			0.638017	5	0	0	2
CGHWN	Relaxed-Dedup-Meta	Boncat_Soil	BONCAT_SYTO_Terrestrial_sediment - 16	Microbial enrichment	Nextera XT	24	Relaxed	Read deduplication	Metagenome	217553808	30970584	179605	456479	467	302	44286			0.647823	8	0	0	4
CGHWN	Relaxed-Norm-Meta	Boncat_Soil	BONCAT_SYTO_Terrestrial_sediment - 16	Microbial enrichment	Nextera XT	24	Relaxed	Read normalization	Metagenome	167231005	18576348	188879	386905	413	287	41132			0.637678	5	0	0	3
CGHWN	Relaxed-None-SingleCell	Boncat_Soil	BONCAT_SYTO_Terrestrial_sediment - 16	Microbial enrichment	Nextera XT	24	Relaxed	None	Single-cell	215848940	32632890	328309	469790	441	289	46343			0.615563	8	0	0	3
CGHWN	Relaxed-Dedup-SingleCell	Boncat_Soil	BONCAT_SYTO_Terrestrial_sediment - 16	Microbial enrichment	Nextera XT	24	Relaxed	Read deduplication	Single-cell	248141439	40031252	444848	517521	463	301	46343			0.608316	11	0	0	5
CGHWN	Relaxed-Norm-SingleCell	Boncat_Soil	BONCAT_SYTO_Terrestrial_sediment - 16	Microbial enrichment	Nextera XT	24	Relaxed	Read normalization	Single-cell	175794578	29880209	304530	377629	449	288	61736			0.604801	8	0	0	3
CGHWO	Strict-None-Meta	Boncat_Soil	BONCAT_SYTO_Terrestrial_sediment - 17	Microbial enrichment	Nextera XT	24	Strict	None	Metagenome	120486932	10790951	205853	292741	390	284	41826			0.616928	2	0	0	2
CGHWO	Strict-Dedup-Meta	Boncat_Soil	BONCAT_SYTO_Terrestrial_sediment - 17	Microbial enrichment	Nextera XT	24	Strict	Read deduplication	Metagenome	123718166	17314258	198575	262029	461	300	47780			0.637751	5	0	0	3
CGHWO	Strict-Norm-Meta	Boncat_Soil	BONCAT_SYTO_Terrestrial_sediment - 17	Microbial enrichment	Nextera XT	24	Strict	Read normalization	Metagenome	111272310	10281284	205675	270979	388	284	41826			0.614436	2	0	0	2
CGHWO	Strict-None-SingleCell	Boncat_Soil	BONCAT_SYTO_Terrestrial_sediment - 17	Microbial enrichment	Nextera XT	24	Strict	None	Single-cell	129689108	18471341	219522	292865	420	286	47780			0.61408	6	0	0	3
CGHWO	Strict-Dedup-SingleCell	Boncat_Soil	BONCAT_SYTO_Terrestrial_sediment - 17	Microbial enrichment	Nextera XT	24	Strict	Read deduplication	Single-cell	142140079	23577979	223166	296458	461	301	47780			0.603417	7	0	0	4
CGHWO	Strict-Norm-SingleCell	Boncat_Soil	BONCAT_SYTO_Terrestrial_sediment - 17	Microbial enrichment	Nextera XT	24	Strict	Read normalization	Single-cell	118314347	17347991	197047	267240	420	285	47780			0.608462	6	0	0	3
CGHWO	Relaxed-None-Meta	Boncat_Soil	BONCAT_SYTO_Terrestrial_sediment - 17	Microbial enrichment	Nextera XT	24	Relaxed	None	Metagenome	194000483	19908858	437401	452890	406	287	56779			0.622873	5	0	1	2
CGHWO	Relaxed-Dedup-Meta	Boncat_Soil	BONCAT_SYTO_Terrestrial_sediment - 17	Microbial enrichment	Nextera XT	24	Relaxed	Read deduplication	Metagenome	220488848	32466302	583259	458942	472	302	73501			0.636881	8	0	1	2
CGHWO	Relaxed-Norm-Meta	Boncat_Soil	BONCAT_SYTO_Terrestrial_sediment - 17	Microbial enrichment	Nextera XT	24	Relaxed	Read normalization	Metagenome	168682948	19438113	530695	387044	417	287	73501			0.61444	4	0	1	2
CGHWO	Relaxed-None-SingleCell	Boncat_Soil	BONCAT_SYTO_Terrestrial_sediment - 17	Microbial enrichment	Nextera XT	24	Relaxed	None	Single-cell	225598917	35589420	814965	486230	445	290	73501			0.609828	10	0	1	1
CGHWO	Relaxed-Dedup-SingleCell	Boncat_Soil	BONCAT_SYTO_Terrestrial_sediment - 17	Microbial enrichment	Nextera XT	24	Relaxed	Read deduplication	Single-cell	250378653	41592121	916601	518637	466	301	73501			0.596668	11	0	1	4
CGHWO	Relaxed-Norm-SingleCell	Boncat_Soil	BONCAT_SYTO_Terrestrial_sediment - 17	Microbial enrichment	Nextera XT	24	Relaxed	Read normalization	Single-cell	178306566	32147951	697903	377838	456	288	73501			0.599688	8	0	1	2
CGHWP	Strict-None-Meta	Boncat_Soil	BONCAT_SYTO_Terrestrial_sediment - 18	Microbial enrichment	Nextera XT	24	Strict	None	Metagenome	11671917	2311801	15812	23344	525	287	15812			0.6794	0	0	0	0
CGHWP	Strict-Dedup-Meta	Boncat_Soil	BONCAT_SYTO_Terrestrial_sediment - 18	Microbial enrichment	Nextera XT	24	Strict	Read deduplication	Metagenome	10683481	2357706	15812	19744	570	312	15812			0.674978	0	0	0	0
CGHWP	Strict-Norm-Meta	Boncat_Soil	BONCAT_SYTO_Terrestrial_sediment - 18	Microbial enrichment	Nextera XT	24	Strict	Read normalization	Metagenome	11321691	2253521	15811	22565	528	287	15811			0.682347	0	0	0	0
CGHWP	Strict-None-SingleCell	Boncat_Soil	BONCAT_SYTO_Terrestrial_sediment - 18	Microbial enrichment	Nextera XT	24	Strict	None	Single-cell	12012181	2768670	15812	23123	551	288	15812			0.647736	0	0	0	0
CGHWP	Strict-Dedup-SingleCell	Boncat_Soil	BONCAT_SYTO_Terrestrial_sediment - 18	Microbial enrichment	Nextera XT	24	Strict	Read deduplication	Single-cell	11020576	2766595	15812	19664	593	316	15812			0.652324	0	0	0	0
CGHWP	Strict-Norm-SingleCell	Boncat_Soil	BONCAT_SYTO_Terrestrial_sediment - 18	Microbial enrichment	Nextera XT	24	Strict	Read normalization	Single-cell	11602707	2692348	15811	22247	556	288	15811			0.653118	0	0	0	0
CGHWP	Relaxed-None-Meta	Boncat_Soil	BONCAT_SYTO_Terrestrial_sediment - 18	Microbial enrichment	Nextera XT	24	Relaxed	None	Metagenome	55150347	9839976	15790	116458	456	293	15790			0.651218	2	0	0	1
CGHWP	Relaxed-Dedup-Meta	Boncat_Soil	BONCAT_SYTO_Terrestrial_sediment - 18	Microbial enrichment	Nextera XT	24	Relaxed	Read deduplication	Metagenome	54580003	10052683	15790	113373	466	297	15790			0.646729	2	0	0	1
CGHWP	Relaxed-Norm-Meta	Boncat_Soil	BONCAT_SYTO_Terrestrial_sediment - 18	Microbial enrichment	Nextera XT	24	Relaxed	Read normalization	Metagenome	31689635	8461769	15790	58175	584	300	15790			0.645935	1	0	0	2
CGHWP	Relaxed-None-SingleCell	Boncat_Soil	BONCAT_SYTO_Terrestrial_sediment - 18	Microbial enrichment	Nextera XT	24	Relaxed	None	Single-cell	67810304	12740596	16142	142244	450	297	16142			0.579366	2	0	0	2
CGHWP	Relaxed-Dedup-SingleCell	Boncat_Soil	BONCAT_SYTO_Terrestrial_sediment - 18	Microbial enrichment	Nextera XT	24	Relaxed	Read deduplication	Single-cell	67562063	12778133	16142	140686	454	300	16142			0.579008	2	0	0	2
CGHWP	Relaxed-Norm-SingleCell	Boncat_Soil	BONCAT_SYTO_Terrestrial_sediment - 18	Microbial enrichment	Nextera XT	24	Relaxed	Read normalization	Single-cell	33161988	11002639	16142	56461	648	305	16142			0.567416	1	0	0	2
CGTAO	Strict-None-Meta	Soil_viruses_Abisko	P.10.14	Virus fraction	Accel-NGS 1S Plus	18	Strict	None	Metagenome	67801042	31127859	4617740	97944	842	316	38865			0.44899
CGTAO	Strict-Dedup-Meta	Soil_viruses_Abisko	P.10.14	Virus fraction	Accel-NGS 1S Plus	18	Strict	Read deduplication	Metagenome	66313259	23747349	27220	110372	655	315	14910			0.592884
CGTAO	Strict-Norm-Meta	Soil_viruses_Abisko	P.10.14	Virus fraction	Accel-NGS 1S Plus	18	Strict	Read normalization	Metagenome	68127441	30720435	2650372	99975	823	316	27810			0.473153
CGTAO	Strict-None-SingleCell	Soil_viruses_Abisko	P.10.14	Virus fraction	Accel-NGS 1S Plus	18	Strict	None	Single-cell	62184084	32488111	4804217	80741	1112	322	40723			0.42207
CGTAO	Strict-Dedup-SingleCell	Soil_viruses_Abisko	P.10.14	Virus fraction	Accel-NGS 1S Plus	18	Strict	Read deduplication	Single-cell	66910109	35723042	13242936	83566	1204	323	105738			0.360193
CGTAO	Strict-Norm-SingleCell	Soil_viruses_Abisko	P.10.14	Virus fraction	Accel-NGS 1S Plus	18	Strict	Read normalization	Single-cell	61905473	32333367	3185057	80816	1109	323	29146			0.435545
CGTAO	Relaxed-None-Meta	Soil_viruses_Abisko	P.10.14	Virus fraction	Accel-NGS 1S Plus	18	Relaxed	None	Metagenome	71630650	33608093	7663203	100830	878	317	97740			0.433035
CGTAO	Relaxed-Dedup-Meta	Soil_viruses_Abisko	P.10.14	Virus fraction	Accel-NGS 1S Plus	18	Relaxed	Read deduplication	Metagenome	70196364	30650456	394087	104593	792	319	23447			0.517837
CGTAO	Relaxed-Norm-Meta	Soil_viruses_Abisko	P.10.14	Virus fraction	Accel-NGS 1S Plus	18	Relaxed	Read normalization	Metagenome	71767080	33054120	4485273	102922	853	318	47501			0.450403
CGTAO	Relaxed-None-SingleCell	Soil_viruses_Abisko	P.10.14	Virus fraction	Accel-NGS 1S Plus	18	Relaxed	None	Single-cell	66260245	34903691	7857305	84437	1136	323	82574			0.402439
CGTAO	Relaxed-Dedup-SingleCell	Soil_viruses_Abisko	P.10.14	Virus fraction	Accel-NGS 1S Plus	18	Relaxed	Read deduplication	Single-cell	72007291	38321571	17801319	88556	1202	324	372751			0.334369
CGTAO	Relaxed-Norm-SingleCell	Soil_viruses_Abisko	P.10.14	Virus fraction	Accel-NGS 1S Plus	18	Relaxed	Read normalization	Single-cell	65449936	34308055	4141569	84474	1115	323	30553			0.431497
CGTAP	Strict-None-Meta	Soil_viruses_Abisko	P.30.34	Virus fraction	Accel-NGS 1S Plus	18	Strict	None	Metagenome	118197298	51883061	5486842	172020	806	320	114629			0.452064
CGTAP	Strict-Dedup-Meta	Soil_viruses_Abisko	P.30.34	Virus fraction	Accel-NGS 1S Plus	18	Strict	Read deduplication	Metagenome	115272763	50278591	1107515	168996	817	324	62001			0.501371
CGTAP	Strict-Norm-Meta	Soil_viruses_Abisko	P.30.34	Virus fraction	Accel-NGS 1S Plus	18	Strict	Read normalization	Metagenome	118329429	51666325	4312137	172870	802	320	57435			0.4459
CGTAP	Strict-None-SingleCell	Soil_viruses_Abisko	P.30.34	Virus fraction	Accel-NGS 1S Plus	18	Strict	None	Single-cell	109618926	55772740	7003109	142258	1036	327	70792			0.408141
CGTAP	Strict-Dedup-SingleCell	Soil_viruses_Abisko	P.30.34	Virus fraction	Accel-NGS 1S Plus	18	Strict	Read deduplication	Single-cell	119607331	63109869	23791849	147607	1138	330	191088			0.30979
CGTAP	Strict-Norm-SingleCell	Soil_viruses_Abisko	P.30.34	Virus fraction	Accel-NGS 1S Plus	18	Strict	Read normalization	Single-cell	109470110	56301397	8222695	140432	1061	328	67582			0.402117
CGTAP	Relaxed-None-Meta	Soil_viruses_Abisko	P.30.34	Virus fraction	Accel-NGS 1S Plus	18	Relaxed	None	Metagenome	123902918	56055125	8491619	175627	839	321	249089			0.421873
CGTAP	Relaxed-Dedup-Meta	Soil_viruses_Abisko	P.30.34	Virus fraction	Accel-NGS 1S Plus	18	Relaxed	Read deduplication	Metagenome	120477742	58192360	6582381	162295	937	327	116472			0.41358
CGTAP	Relaxed-Norm-Meta	Soil_viruses_Abisko	P.30.34	Virus fraction	Accel-NGS 1S Plus	18	Relaxed	Read normalization	Metagenome	123741813	55782355	7278651	175955	836	322	206487			0.427849
CGTAP	Relaxed-None-SingleCell	Soil_viruses_Abisko	P.30.34	Virus fraction	Accel-NGS 1S Plus	18	Relaxed	None	Single-cell	115309261	58891502	9813034	148296	1046	327	116118			0.393266
CGTAP	Relaxed-Dedup-SingleCell	Soil_viruses_Abisko	P.30.34	Virus fraction	Accel-NGS 1S Plus	18	Relaxed	Read deduplication	Single-cell	125398391	66001232	28196755	151882	1127	331	251495			0.307098
CGTAP	Relaxed-Norm-SingleCell	Soil_viruses_Abisko	P.30.34	Virus fraction	Accel-NGS 1S Plus	18	Relaxed	Read normalization	Single-cell	115450773	60950259	17321351	142449	1135	330	106647			0.355565
CGTAS	Strict-None-Meta	Soil_viruses_Abisko	B.1.5	Virus fraction	Accel-NGS 1S Plus	18	Strict	None	Metagenome	396154534	139305306	8644066	657768	647	312	140195			0.504237
CGTAS	Strict-Dedup-Meta	Soil_viruses_Abisko	B.1.5	Virus fraction	Accel-NGS 1S Plus	18	Strict	Read deduplication	Metagenome	409797219	192566188	44215916	567523	888	320	185957			0.403474
CGTAS	Strict-Norm-Meta	Soil_viruses_Abisko	B.1.5	Virus fraction	Accel-NGS 1S Plus	18	Strict	Read normalization	Metagenome	393403667	139173604	8387757	651050	651	313	223830			0.515673
CGTAS	Strict-None-SingleCell	Soil_viruses_Abisko	B.1.5	Virus fraction	Accel-NGS 1S Plus	18	Strict	None	Single-cell	395252040	182856207	35528478	559008	861	318	189722			0.399359
CGTAS	Strict-Dedup-SingleCell	Soil_viruses_Abisko	B.1.5	Virus fraction	Accel-NGS 1S Plus	18	Strict	Read deduplication	Single-cell	443208744	200968051	61599878	634874	825	318	681589			0.376962
CGTAS	Strict-Norm-SingleCell	Soil_viruses_Abisko	B.1.5	Virus fraction	Accel-NGS 1S Plus	18	Strict	Read normalization	Single-cell	392933603	185036652	42484337	545739	887	319	153807			0.401764
CGTAS	Relaxed-None-Meta	Soil_viruses_Abisko	B.1.5	Virus fraction	Accel-NGS 1S Plus	18	Relaxed	None	Metagenome	472547035	191928289	25622325	726268	727	315	327258			0.442766
CGTAS	Relaxed-Dedup-Meta	Soil_viruses_Abisko	B.1.5	Virus fraction	Accel-NGS 1S Plus	18	Relaxed	Read deduplication	Metagenome	491676717	232429545	67067085	672593	896	321	390667			0.390574
CGTAS	Relaxed-Norm-Meta	Soil_viruses_Abisko	B.1.5	Virus fraction	Accel-NGS 1S Plus	18	Relaxed	Read normalization	Metagenome	456997768	190683167	25382885	689478	754	317	263504			0.448673
CGTAS	Relaxed-None-SingleCell	Soil_viruses_Abisko	B.1.5	Virus fraction	Accel-NGS 1S Plus	18	Relaxed	None	Single-cell	476271331	221414113	51360220	666666	868	319	158979			0.399709
CGTAS	Relaxed-Dedup-SingleCell	Soil_viruses_Abisko	B.1.5	Virus fraction	Accel-NGS 1S Plus	18	Relaxed	Read deduplication	Single-cell	535427048	238502424	73947125	763475	803	318	681574			0.372017
CGTAS	Relaxed-Norm-SingleCell	Soil_viruses_Abisko	B.1.5	Virus fraction	Accel-NGS 1S Plus	18	Relaxed	Read normalization	Single-cell	458396685	220997099	55132224	621483	929	321	217837			0.38623
CGTAT	Strict-None-Meta	Soil_viruses_Abisko	B.10.14	Virus fraction	Accel-NGS 1S Plus	18	Strict	None	Metagenome	137857395	56441831	2565885	213276	741	315	56423			0.495549
CGTAT	Strict-Dedup-Meta	Soil_viruses_Abisko	B.10.14	Virus fraction	Accel-NGS 1S Plus	18	Strict	Read deduplication	Metagenome	135203964	67530132	7400582	179697	997	325	56423			0.40833
CGTAT	Strict-Norm-Meta	Soil_viruses_Abisko	B.10.14	Virus fraction	Accel-NGS 1S Plus	18	Strict	Read normalization	Metagenome	137290726	56297579	1979262	211939	744	316	56564			0.506502
CGTAT	Strict-None-SingleCell	Soil_viruses_Abisko	B.10.14	Virus fraction	Accel-NGS 1S Plus	18	Strict	None	Single-cell	128667625	64211526	6096402	172261	996	323	56423			0.421725
CGTAT	Strict-Dedup-SingleCell	Soil_viruses_Abisko	B.10.14	Virus fraction	Accel-NGS 1S Plus	18	Strict	Read deduplication	Single-cell	142447919	74686521	25562226	178817	1131	327	232998			0.330603
CGTAT	Strict-Norm-SingleCell	Soil_viruses_Abisko	B.10.14	Virus fraction	Accel-NGS 1S Plus	18	Strict	Read normalization	Single-cell	127933542	65135446	7611188	167812	1041	325	63145			0.407647
CGTAT	Relaxed-None-Meta	Soil_viruses_Abisko	B.10.14	Virus fraction	Accel-NGS 1S Plus	18	Relaxed	None	Metagenome	147109598	63891605	5253164	218305	789	317	89420			0.461733
CGTAT	Relaxed-Dedup-Meta	Soil_viruses_Abisko	B.10.14	Virus fraction	Accel-NGS 1S Plus	18	Relaxed	Read deduplication	Metagenome	143504838	74794860	20934518	180273	1101	327	137243			0.348556
CGTAT	Relaxed-Norm-Meta	Soil_viruses_Abisko	B.10.14	Virus fraction	Accel-NGS 1S Plus	18	Relaxed	Read normalization	Metagenome	145701154	63621328	4475739	214972	797	318	113173			0.456155
CGTAT	Relaxed-None-SingleCell	Soil_viruses_Abisko	B.10.14	Virus fraction	Accel-NGS 1S Plus	18	Relaxed	None	Single-cell	138194797	69328086	9129001	182851	1007	323	89194			0.408377
CGTAT	Relaxed-Dedup-SingleCell	Soil_viruses_Abisko	B.10.14	Virus fraction	Accel-NGS 1S Plus	18	Relaxed	Read deduplication	Single-cell	151827383	79159573	29812739	187553	1110	329	379698			0.311187
CGTAT	Relaxed-Norm-SingleCell	Soil_viruses_Abisko	B.10.14	Virus fraction	Accel-NGS 1S Plus	18	Relaxed	Read normalization	Single-cell	136938253	71660751	16852179	172746	1116	326	79147			0.360867
CGTAU	Strict-None-Meta	Soil_viruses_Abisko	B.20.24	Virus fraction	Accel-NGS 1S Plus	12	Strict	None	Metagenome	393194436	138648058	9110997	651018	653	313	68714			0.513483
CGTAU	Strict-Dedup-Meta	Soil_viruses_Abisko	B.20.24	Virus fraction	Accel-NGS 1S Plus	12	Strict	Read deduplication	Metagenome	401967971	200660531	59785382	525917	996	323	307449			0.362243
CGTAU	Strict-Norm-Meta	Soil_viruses_Abisko	B.20.24	Virus fraction	Accel-NGS 1S Plus	12	Strict	Read normalization	Metagenome	389547225	138694690	8536237	641554	659	314	71560			0.515914
CGTAU	Strict-None-SingleCell	Soil_viruses_Abisko	B.20.24	Virus fraction	Accel-NGS 1S Plus	12	Strict	None	Single-cell	396462814	192995980	48255259	534585	945	321	306199			0.37213
CGTAU	Strict-Dedup-SingleCell	Soil_viruses_Abisko	B.20.24	Virus fraction	Accel-NGS 1S Plus	12	Strict	Read deduplication	Single-cell	433121151	208425620	78513961	584664	921	321	898327			0.3388
CGTAU	Strict-Norm-SingleCell	Soil_viruses_Abisko	B.20.24	Virus fraction	Accel-NGS 1S Plus	12	Strict	Read normalization	Single-cell	392470826	192744829	49770538	523310	963	322	351942			0.37672
CGTAU	Relaxed-None-Meta	Soil_viruses_Abisko	B.20.24	Virus fraction	Accel-NGS 1S Plus	12	Relaxed	None	Metagenome	478558405	203022418	31560022	712826	765	317	898806			0.417312
CGTAU	Relaxed-Dedup-Meta	Soil_viruses_Abisko	B.20.24	Virus fraction	Accel-NGS 1S Plus	12	Relaxed	Read deduplication	Metagenome	493064319	244317585	86625390	644942	982	323	898583			0.35265
CGTAU	Relaxed-Norm-Meta	Soil_viruses_Abisko	B.20.24	Virus fraction	Accel-NGS 1S Plus	12	Relaxed	Read normalization	Metagenome	460426439	201382694	31018387	670363	800	320	979210			0.417157
CGTAU	Relaxed-None-SingleCell	Soil_viruses_Abisko	B.20.24	Virus fraction	Accel-NGS 1S Plus	12	Relaxed	None	Single-cell	327668898	147255903	31235577	469037	827	318	245885			0.402375
CGTAU	Relaxed-Dedup-SingleCell	Soil_viruses_Abisko	B.20.24	Virus fraction	Accel-NGS 1S Plus	12	Relaxed	Read deduplication	Single-cell	536242787	251106502	93571620	730401	875	321	898778			0.34839
CGTAU	Relaxed-Norm-SingleCell	Soil_viruses_Abisko	B.20.24	Virus fraction	Accel-NGS 1S Plus	12	Relaxed	Read normalization	Single-cell	467800829	235149015	74528916	606283	1011	325	550448			0.357994
CGTAW	Strict-None-Meta	Soil_viruses_Abisko	B.30.34	Virus fraction	Accel-NGS 1S Plus	18	Strict	None	Metagenome	65458538	29885653	2335405	93465	862	323	43015			0.489152
CGTAW	Strict-Dedup-Meta	Soil_viruses_Abisko	B.30.34	Virus fraction	Accel-NGS 1S Plus	18	Strict	Read deduplication	Metagenome	63914222	26762558	222327	96061	783	326	39573			0.56606
CGTAW	Strict-Norm-Meta	Soil_viruses_Abisko	B.30.34	Virus fraction	Accel-NGS 1S Plus	18	Strict	Read normalization	Metagenome	65986057	29387840	1052678	96054	833	323	23022			0.510981
CGTAW	Strict-None-SingleCell	Soil_viruses_Abisko	B.30.34	Virus fraction	Accel-NGS 1S Plus	18	Strict	None	Single-cell	59574160	31422083	2886251	75578	1102	332	52002			0.459346
CGTAW	Strict-Dedup-SingleCell	Soil_viruses_Abisko	B.30.34	Virus fraction	Accel-NGS 1S Plus	18	Strict	Read deduplication	Single-cell	65940671	36299924	12158387	82692	1251	329	167327			0.387407
CGTAW	Strict-Norm-SingleCell	Soil_viruses_Abisko	B.30.34	Virus fraction	Accel-NGS 1S Plus	18	Strict	Read normalization	Single-cell	59532409	31766957	2581581	74841	1125	333	25754			0.462022
CGTAW	Relaxed-None-Meta	Soil_viruses_Abisko	B.30.34	Virus fraction	Accel-NGS 1S Plus	18	Relaxed	None	Metagenome	68923858	32677710	4324490	95264	911	324	69068			0.470856
CGTAW	Relaxed-Dedup-Meta	Soil_viruses_Abisko	B.30.34	Virus fraction	Accel-NGS 1S Plus	18	Relaxed	Read deduplication	Metagenome	67142755	33888753	2933227	87631	1019	332	52002			0.466341
CGTAW	Relaxed-Norm-Meta	Soil_viruses_Abisko	B.30.34	Virus fraction	Accel-NGS 1S Plus	18	Relaxed	Read normalization	Metagenome	69242931	32073466	2241231	97795	881	325	54494			0.488236
CGTAW	Relaxed-None-SingleCell	Soil_viruses_Abisko	B.30.34	Virus fraction	Accel-NGS 1S Plus	18	Relaxed	None	Single-cell	63303068	34024320	4369139	78433	1152	333	31701			0.434604
CGTAW	Relaxed-Dedup-SingleCell	Soil_viruses_Abisko	B.30.34	Virus fraction	Accel-NGS 1S Plus	18	Relaxed	Read deduplication	Single-cell	69362067	38946780	14836037	79610	1321	338	446883			0.367315
CGTAW	Relaxed-Norm-SingleCell	Soil_viruses_Abisko	B.30.34	Virus fraction	Accel-NGS 1S Plus	18	Relaxed	Read normalization	Single-cell	62822172	34093104	3562719	77399	1174	335	38832			0.447366
CGTAX	Strict-None-Meta	Soil_viruses_Abisko	F.1.5	Virus fraction	Accel-NGS 1S Plus	18	Strict	None	Metagenome	69593377	33139955	5062604	95410	906	324	81540			0.430032
CGTAX	Strict-Dedup-Meta	Soil_viruses_Abisko	F.1.5	Virus fraction	Accel-NGS 1S Plus	18	Strict	Read deduplication	Metagenome	67860221	28428345	150619	102068	784	325	37472			0.552328
CGTAX	Strict-Norm-Meta	Soil_viruses_Abisko	F.1.5	Virus fraction	Accel-NGS 1S Plus	18	Strict	Read normalization	Metagenome	70448230	32966090	2778143	98302	881	324	29537			0.461512
CGTAX	Strict-None-SingleCell	Soil_viruses_Abisko	F.1.5	Virus fraction	Accel-NGS 1S Plus	18	Strict	None	Single-cell	64118237	34140765	4749635	79403	1158	332	40416			0.404426
CGTAX	Strict-Dedup-SingleCell	Soil_viruses_Abisko	F.1.5	Virus fraction	Accel-NGS 1S Plus	18	Strict	Read deduplication	Single-cell	69397684	37885405	12848766	82025	1273	334	108450			0.335425
CGTAX	Strict-Norm-SingleCell	Soil_viruses_Abisko	F.1.5	Virus fraction	Accel-NGS 1S Plus	18	Strict	Read normalization	Single-cell	64078726	33992016	2638700	80102	1145	332	25427			0.426767
CGTAX	Relaxed-None-Meta	Soil_viruses_Abisko	F.1.5	Virus fraction	Accel-NGS 1S Plus	18	Relaxed	None	Metagenome	72147005	34902060	6228178	97073	935	325	143467			0.414951
CGTAX	Relaxed-Dedup-Meta	Soil_viruses_Abisko	F.1.5	Virus fraction	Accel-NGS 1S Plus	18	Relaxed	Read deduplication	Metagenome	70355120	35005287	2200882	92553	990	330	38406			0.440236
CGTAX	Relaxed-Norm-Meta	Soil_viruses_Abisko	F.1.5	Virus fraction	Accel-NGS 1S Plus	18	Relaxed	Read normalization	Metagenome	72788743	34580267	3892775	99785	906	325	54757			0.436504
CGTAX	Relaxed-None-SingleCell	Soil_viruses_Abisko	F.1.5	Virus fraction	Accel-NGS 1S Plus	18	Relaxed	None	Single-cell	66918644	35819881	6840328	81809	1173	332	57612			0.389608
CGTAX	Relaxed-Dedup-SingleCell	Soil_viruses_Abisko	F.1.5	Virus fraction	Accel-NGS 1S Plus	18	Relaxed	Read deduplication	Single-cell	72737814	39483884	16130801	84747	1243	335	304566			0.326374
CGTAX	Relaxed-Norm-SingleCell	Soil_viruses_Abisko	F.1.5	Virus fraction	Accel-NGS 1S Plus	18	Relaxed	Read normalization	Single-cell	66487124	35482387	3375376	82274	1156	333	38230			0.424442
CGTAY	Strict-None-Meta	Soil_viruses_Abisko	B.10.14.2	Virus fraction	Accel-NGS 1S Plus	18	Strict	None	Metagenome	111660859	38887315	4693549	189236	608	307	86429			0.473586
CGTAY	Strict-Dedup-Meta	Soil_viruses_Abisko	B.10.14.2	Virus fraction	Accel-NGS 1S Plus	18	Strict	Read deduplication	Metagenome	112851522	43732869	2529640	180586	677	312	145657			0.472504
CGTAY	Strict-Norm-Meta	Soil_viruses_Abisko	B.10.14.2	Virus fraction	Accel-NGS 1S Plus	18	Strict	Read normalization	Metagenome	111692203	38760362	3523049	189706	608	308	88746			0.476474
CGTAY	Strict-None-SingleCell	Soil_viruses_Abisko	B.10.14.2	Virus fraction	Accel-NGS 1S Plus	18	Strict	None	Single-cell	102531390	42175552	3846391	160371	711	310	40733			0.449247
CGTAY	Strict-Dedup-SingleCell	Soil_viruses_Abisko	B.10.14.2	Virus fraction	Accel-NGS 1S Plus	18	Strict	Read deduplication	Single-cell	121398219	49902529	16093029	193584	698	307	208188			0.364692
CGTAY	Strict-Norm-SingleCell	Soil_viruses_Abisko	B.10.14.2	Virus fraction	Accel-NGS 1S Plus	18	Strict	Read normalization	Single-cell	102302092	42198469	3619463	159585	714	311	94588			0.448748
CGTAY	Relaxed-None-Meta	Soil_viruses_Abisko	B.10.14.2	Virus fraction	Accel-NGS 1S Plus	18	Relaxed	None	Metagenome	118672052	42599452	6271223	197913	619	308	246261			0.456461
CGTAY	Relaxed-Dedup-Meta	Soil_viruses_Abisko	B.10.14.2	Virus fraction	Accel-NGS 1S Plus	18	Relaxed	Read deduplication	Metagenome	119964328	49575045	10199133	183259	714	312	331526			0.409999
CGTAY	Relaxed-Norm-Meta	Soil_viruses_Abisko	B.10.14.2	Virus fraction	Accel-NGS 1S Plus	18	Relaxed	Read normalization	Metagenome	117816852	42452410	5420831	196072	623	308	202081			0.456471
CGTAY	Relaxed-None-SingleCell	Soil_viruses_Abisko	B.10.14.2	Virus fraction	Accel-NGS 1S Plus	18	Relaxed	None	Single-cell	109320105	45252720	5833859	169239	717	310	228863			0.431477
CGTAY	Relaxed-Dedup-SingleCell	Soil_viruses_Abisko	B.10.14.2	Virus fraction	Accel-NGS 1S Plus	18	Relaxed	Read deduplication	Single-cell	128235039	52849110	17912525	195148	699	312	309622			0.365421
CGTAY	Relaxed-Norm-SingleCell	Soil_viruses_Abisko	B.10.14.2	Virus fraction	Accel-NGS 1S Plus	18	Relaxed	Read normalization	Single-cell	108173259	45126982	4976102	166758	723	311	224824			0.43415
CGTAZ	Strict-None-Meta	Soil_viruses_Abisko	F.1.5.2	Virus fraction	Accel-NGS 1S Plus	15	Strict	None	Metagenome	224468235	115796615	32353561	283224	1065	330	297458			0.367236
CGTAZ	Strict-Dedup-Meta	Soil_viruses_Abisko	F.1.5.2	Virus fraction	Accel-NGS 1S Plus	15	Strict	Read deduplication	Metagenome	220707024	129679746	45593955	241867	1501	340	246288			0.330127
CGTAZ	Strict-Norm-Meta	Soil_viruses_Abisko	F.1.5.2	Virus fraction	Accel-NGS 1S Plus	15	Strict	Read normalization	Metagenome	224103357	115743811	30669386	282612	1067	330	208551			0.375306
CGTAZ	Strict-None-SingleCell	Soil_viruses_Abisko	F.1.5.2	Virus fraction	Accel-NGS 1S Plus	15	Strict	None	Single-cell	218540416	127336835	44912422	241228	1481	340	167862			0.328887
CGTAZ	Strict-Dedup-SingleCell	Soil_viruses_Abisko	F.1.5.2	Virus fraction	Accel-NGS 1S Plus	15	Strict	Read deduplication	Single-cell	230630031	135650842	63311870	247561	1547	342	644642			0.296447
CGTAZ	Strict-Norm-SingleCell	Soil_viruses_Abisko	F.1.5.2	Virus fraction	Accel-NGS 1S Plus	15	Strict	Read normalization	Single-cell	217912674	127379083	46679383	239057	1501	340	191661			0.323118
CGTAZ	Relaxed-None-Meta	Soil_viruses_Abisko	F.1.5.2	Virus fraction	Accel-NGS 1S Plus	15	Relaxed	None	Metagenome	238000837	127802826	43254475	287819	1169	332	305285			0.343001
CGTAZ	Relaxed-Dedup-Meta	Soil_viruses_Abisko	F.1.5.2	Virus fraction	Accel-NGS 1S Plus	15	Relaxed	Read deduplication	Metagenome	233873965	139789999	62819342	248631	1607	341	659277			0.298684
CGTAZ	Relaxed-Norm-Meta	Soil_viruses_Abisko	F.1.5.2	Virus fraction	Accel-NGS 1S Plus	15	Relaxed	Read normalization	Metagenome	235996733	127578060	42019779	283283	1186	333	294689			0.337764
CGTAZ	Relaxed-None-SingleCell	Soil_viruses_Abisko	F.1.5.2	Virus fraction	Accel-NGS 1S Plus	15	Relaxed	None	Single-cell	232979075	136601874	52244590	254939	1514	340	230916			0.325286
CGTAZ	Relaxed-Dedup-SingleCell	Soil_viruses_Abisko	F.1.5.2	Virus fraction	Accel-NGS 1S Plus	15	Relaxed	Read deduplication	Single-cell	245888676	143966364	68240340	265735	1526	340	884565			0.29873
CGTAZ	Relaxed-Norm-SingleCell	Soil_viruses_Abisko	F.1.5.2	Virus fraction	Accel-NGS 1S Plus	15	Relaxed	Read normalization	Single-cell	230701802	137105859	55884162	247340	1593	342	229068			0.308377
CGTBA	Strict-None-Meta	Soil_viruses_Abisko	F.1.5.2B	Virus fraction	Accel-NGS 1S Plus	15	Strict	None	Metagenome	99067180	59022059	22614451	105019	1559	348	275764			0.349624
CGTBA	Strict-Dedup-Meta	Soil_viruses_Abisko	F.1.5.2B	Virus fraction	Accel-NGS 1S Plus	15	Strict	Read deduplication	Metagenome	97775381	55387865	3165078	114649	1273	349	59331			0.4659
CGTBA	Strict-Norm-Meta	Soil_viruses_Abisko	F.1.5.2B	Virus fraction	Accel-NGS 1S Plus	15	Strict	Read normalization	Metagenome	99757590	59228292	18376955	107126	1526	349	151526			0.368737
CGTBA	Strict-None-SingleCell	Soil_viruses_Abisko	F.1.5.2B	Virus fraction	Accel-NGS 1S Plus	15	Strict	None	Single-cell	95520362	61354819	23649764	91440	2008	364	108266			0.341741
CGTBA	Strict-Dedup-SingleCell	Soil_viruses_Abisko	F.1.5.2B	Virus fraction	Accel-NGS 1S Plus	15	Strict	Read deduplication	Single-cell	99187246	64095052	33206864	92117	2143	365	311711			0.304024
CGTBA	Strict-Norm-SingleCell	Soil_viruses_Abisko	F.1.5.2B	Virus fraction	Accel-NGS 1S Plus	15	Strict	Read normalization	Single-cell	95373908	61268998	21541802	91692	1987	364	113176			0.352105
CGTBA	Relaxed-None-Meta	Soil_viruses_Abisko	F.1.5.2B	Virus fraction	Accel-NGS 1S Plus	15	Relaxed	None	Metagenome	102154498	62100613	27317199	104695	1676	352	296889			0.344595
CGTBA	Relaxed-Dedup-Meta	Soil_viruses_Abisko	F.1.5.2B	Virus fraction	Accel-NGS 1S Plus	15	Relaxed	Read deduplication	Metagenome	99577186	63042715	24849794	97270	1922	361	101371			0.341615
CGTBA	Relaxed-Norm-Meta	Soil_viruses_Abisko	F.1.5.2B	Virus fraction	Accel-NGS 1S Plus	15	Relaxed	Read normalization	Metagenome	102672329	62262246	23259460	106479	1637	353	270479			0.355673
CGTBA	Relaxed-None-SingleCell	Soil_viruses_Abisko	F.1.5.2B	Virus fraction	Accel-NGS 1S Plus	15	Relaxed	None	Single-cell	98871714	64181395	27959584	92423	2113	366	215226			0.330241
CGTBA	Relaxed-Dedup-SingleCell	Soil_viruses_Abisko	F.1.5.2B	Virus fraction	Accel-NGS 1S Plus	15	Relaxed	Read deduplication	Single-cell	102585524	66658705	35479824	93990	2246	366	685103			0.310972
CGTBA	Relaxed-Norm-SingleCell	Soil_viruses_Abisko	F.1.5.2B	Virus fraction	Accel-NGS 1S Plus	15	Relaxed	Read normalization	Single-cell	98370883	63928340	24789765	92433	2097	367	215726			0.336208
CGTBB	Strict-None-Meta	Soil_viruses_Abisko	B.1.5.3	Virus fraction	Accel-NGS 1S Plus	15	Strict	None	Metagenome	107253390	23943618	11550	263583	564	130	11550			0.662986
CGTBB	Strict-Dedup-Meta	Soil_viruses_Abisko	B.1.5.3	Virus fraction	Accel-NGS 1S Plus	15	Strict	Read deduplication	Metagenome	104769174	64107075	2480284	113938	1453	366	32598			0.477951
CGTBB	Strict-Norm-Meta	Soil_viruses_Abisko	B.1.5.3	Virus fraction	Accel-NGS 1S Plus	15	Strict	Read normalization	Metagenome	106568219	67126106	11385766	108457	1725	363	86012			0.394003
CGTBB	Strict-None-SingleCell	Soil_viruses_Abisko	B.1.5.3	Virus fraction	Accel-NGS 1S Plus	15	Strict	None	Single-cell	98740764	69199618	11905751	84961	2383	398	46537			0.374595
CGTBB	Strict-Dedup-SingleCell	Soil_viruses_Abisko	B.1.5.3	Virus fraction	Accel-NGS 1S Plus	15	Strict	Read deduplication	Single-cell	105056379	76506603	40699942	77347	4559	410	384247			0.262619
CGTBB	Strict-Norm-SingleCell	Soil_viruses_Abisko	B.1.5.3	Virus fraction	Accel-NGS 1S Plus	15	Strict	Read normalization	Single-cell	98846404	69623475	12432823	84119	2463	400	61960			0.37271
CGTBB	Relaxed-None-Meta	Soil_viruses_Abisko	B.1.5.3	Virus fraction	Accel-NGS 1S Plus	15	Relaxed	None	Metagenome	108142564	71613918	27285622	98995	2249	372	161451			0.337663
CGTBB	Relaxed-Dedup-Meta	Soil_viruses_Abisko	B.1.5.3	Virus fraction	Accel-NGS 1S Plus	15	Relaxed	Read deduplication	Metagenome	105903389	74901753	24098370	86952	2988	395	139033			0.32903
CGTBB	Relaxed-Norm-Meta	Soil_viruses_Abisko	B.1.5.3	Virus fraction	Accel-NGS 1S Plus	15	Relaxed	Read normalization	Metagenome	108816554	71383226	19631860	102640	2069	371	151567			0.361691
CGTBB	Relaxed-None-SingleCell	Soil_viruses_Abisko	B.1.5.3	Virus fraction	Accel-NGS 1S Plus	15	Relaxed	None	Single-cell	102168831	72965600	20707150	83214	2764	403	181582			0.353469
CGTBB	Relaxed-Dedup-SingleCell	Soil_viruses_Abisko	B.1.5.3	Virus fraction	Accel-NGS 1S Plus	15	Relaxed	Read deduplication	Single-cell	108030696	79131151	43963469	77921	5034	410	744323			0.252298
CGTBB	Relaxed-Norm-SingleCell	Soil_viruses_Abisko	B.1.5.3	Virus fraction	Accel-NGS 1S Plus	15	Relaxed	Read normalization	Single-cell	102909302	75344362	33326373	76836	3836	412	131665			0.297123
CHPGH	Strict-None-Meta	Freshwater_lake_Cyanobacteria	Lake Erie sorted cyanobacteria ER10.Total.B5	Microbial enrichment	Nextera XT	12	Strict	None	Metagenome	18599196	8414158	927026	28163	821	296	32403			0.402567
CHPGH	Strict-Dedup-Meta	Freshwater_lake_Cyanobacteria	Lake Erie sorted cyanobacteria ER10.Total.B5	Microbial enrichment	Nextera XT	12	Strict	Read deduplication	Metagenome	16066330	8498324	982417	20802	1122	317	36957			0.383294
CHPGH	Strict-Norm-Meta	Freshwater_lake_Cyanobacteria	Lake Erie sorted cyanobacteria ER10.Total.B5	Microbial enrichment	Nextera XT	12	Strict	Read normalization	Metagenome	18663351	8472821	570584	28136	829	297	28955			0.420335
CHPGH	Strict-None-SingleCell	Freshwater_lake_Cyanobacteria	Lake Erie sorted cyanobacteria ER10.Total.B5	Microbial enrichment	Nextera XT	12	Strict	None	Single-cell	19477576	9519275	1595230	27123	949	303	36438			0.367083
CHPGH	Strict-Dedup-SingleCell	Freshwater_lake_Cyanobacteria	Lake Erie sorted cyanobacteria ER10.Total.B5	Microbial enrichment	Nextera XT	12	Strict	Read deduplication	Single-cell	17136292	9526669	1855112	20657	1307	324	44469			0.346247
CHPGH	Strict-Norm-SingleCell	Freshwater_lake_Cyanobacteria	Lake Erie sorted cyanobacteria ER10.Total.B5	Microbial enrichment	Nextera XT	12	Strict	Read normalization	Single-cell	19804582	9398860	1198778	29429	897	297	36438			0.379548
CHPGH	Relaxed-None-Meta	Freshwater_lake_Cyanobacteria	Lake Erie sorted cyanobacteria ER10.Total.B5	Microbial enrichment	Nextera XT	12	Relaxed	None	Metagenome	20380532	9175262	1131354	30386	827	301	42697			0.400692
CHPGH	Relaxed-Dedup-Meta	Freshwater_lake_Cyanobacteria	Lake Erie sorted cyanobacteria ER10.Total.B5	Microbial enrichment	Nextera XT	12	Relaxed	Read deduplication	Metagenome	17744117	9118398	1225312	23008	1055	323	36603			0.381288
CHPGH	Relaxed-Norm-Meta	Freshwater_lake_Cyanobacteria	Lake Erie sorted cyanobacteria ER10.Total.B5	Microbial enrichment	Nextera XT	12	Relaxed	Read normalization	Metagenome	20396922	9249787	855335	30177	841	303	35636			0.42415
CHPGH	Relaxed-None-SingleCell	Freshwater_lake_Cyanobacteria	Lake Erie sorted cyanobacteria ER10.Total.B5	Microbial enrichment	Nextera XT	12	Relaxed	None	Single-cell	21537739	10530920	1586839	29758	953	309	28697			0.391686
CHPGH	Relaxed-Dedup-SingleCell	Freshwater_lake_Cyanobacteria	Lake Erie sorted cyanobacteria ER10.Total.B5	Microbial enrichment	Nextera XT	12	Relaxed	Read deduplication	Single-cell	19183306	10538364	1774807	23294	1250	330	32481			0.369165
CHPGH	Relaxed-Norm-SingleCell	Freshwater_lake_Cyanobacteria	Lake Erie sorted cyanobacteria ER10.Total.B5	Microbial enrichment	Nextera XT	12	Relaxed	Read normalization	Single-cell	21597872	10386874	1404296	31004	922	304	36191			0.396997
CHPGN	Strict-None-Meta	Freshwater_lake_Cyanobacteria	Lake Erie sorted cyanobacteria ER10.Small.C5	Microbial enrichment	Nextera XT	12	Strict	None	Metagenome	11300041	5176760	390586	17045	849	296	37500			0.439722
CHPGN	Strict-Dedup-Meta	Freshwater_lake_Cyanobacteria	Lake Erie sorted cyanobacteria ER10.Small.C5	Microbial enrichment	Nextera XT	12	Strict	Read deduplication	Metagenome	9626685	5128370	391298	12450	1143	317	36191			0.405825
CHPGN	Strict-Norm-Meta	Freshwater_lake_Cyanobacteria	Lake Erie sorted cyanobacteria ER10.Small.C5	Microbial enrichment	Nextera XT	12	Strict	Read normalization	Metagenome	11306314	5176992	314795	16903	860	297	37500			0.448812
CHPGN	Strict-None-SingleCell	Freshwater_lake_Cyanobacteria	Lake Erie sorted cyanobacteria ER10.Small.C5	Microbial enrichment	Nextera XT	12	Strict	None	Single-cell	11763963	5758298	549477	16479	960	303	32305			0.399966
CHPGN	Strict-Dedup-SingleCell	Freshwater_lake_Cyanobacteria	Lake Erie sorted cyanobacteria ER10.Small.C5	Microbial enrichment	Nextera XT	12	Strict	Read deduplication	Single-cell	10288339	5768266	865996	12300	1322	328	36451			0.373462
CHPGN	Strict-Norm-SingleCell	Freshwater_lake_Cyanobacteria	Lake Erie sorted cyanobacteria ER10.Small.C5	Microbial enrichment	Nextera XT	12	Strict	Read normalization	Single-cell	11659473	5801054	661085	16086	988	304	32305			0.396755
CHPGN	Relaxed-None-Meta	Freshwater_lake_Cyanobacteria	Lake Erie sorted cyanobacteria ER10.Small.C5	Microbial enrichment	Nextera XT	12	Relaxed	None	Metagenome	11894978	5277371	418530	18175	814	299	37500			0.442857
CHPGN	Relaxed-Dedup-Meta	Freshwater_lake_Cyanobacteria	Lake Erie sorted cyanobacteria ER10.Small.C5	Microbial enrichment	Nextera XT	12	Relaxed	Read deduplication	Metagenome	10137467	5242075	523749	13244	1070	322	36451			0.399887
CHPGN	Relaxed-Norm-Meta	Freshwater_lake_Cyanobacteria	Lake Erie sorted cyanobacteria ER10.Small.C5	Microbial enrichment	Nextera XT	12	Relaxed	Read normalization	Metagenome	11849704	5366209	406275	17665	849	301	37500			0.444764
CHPGN	Relaxed-None-SingleCell	Freshwater_lake_Cyanobacteria	Lake Erie sorted cyanobacteria ER10.Small.C5	Microbial enrichment	Nextera XT	12	Relaxed	None	Single-cell	12386555	5892358	718269	17653	905	305	36191			0.407016
CHPGN	Relaxed-Dedup-SingleCell	Freshwater_lake_Cyanobacteria	Lake Erie sorted cyanobacteria ER10.Small.C5	Microbial enrichment	Nextera XT	12	Relaxed	Read deduplication	Single-cell	10841341	5913909	976677	13238	1237	329	36191			0.364827
CHPGN	Relaxed-Norm-SingleCell	Freshwater_lake_Cyanobacteria	Lake Erie sorted cyanobacteria ER10.Small.C5	Microbial enrichment	Nextera XT	12	Relaxed	Read normalization	Single-cell	12318877	5888316	715313	17564	914	305	24369			0.417456
CHPGO	Strict-None-Meta	Freshwater_lake_Cyanobacteria	Lake Erie sorted cyanobacteria ER36.Total.D5	Microbial enrichment	Nextera XT	12	Strict	None	Metagenome	11232432	5111155	193837	16406	869	305	19346			0.47322
CHPGO	Strict-Dedup-Meta	Freshwater_lake_Cyanobacteria	Lake Erie sorted cyanobacteria ER36.Total.D5	Microbial enrichment	Nextera XT	12	Strict	Read deduplication	Metagenome	10197277	5280417	202399	13121	1062	331	18178			0.458992
CHPGO	Strict-Norm-Meta	Freshwater_lake_Cyanobacteria	Lake Erie sorted cyanobacteria ER36.Total.D5	Microbial enrichment	Nextera XT	12	Strict	Read normalization	Metagenome	11159379	5098195	179773	16253	874	305	19346			0.473345
CHPGO	Strict-None-SingleCell	Freshwater_lake_Cyanobacteria	Lake Erie sorted cyanobacteria ER36.Total.D5	Microbial enrichment	Nextera XT	12	Strict	None	Single-cell	11447777	6193118	490392	14608	1167	316	25625			0.426019
CHPGO	Strict-Dedup-SingleCell	Freshwater_lake_Cyanobacteria	Lake Erie sorted cyanobacteria ER36.Total.D5	Microbial enrichment	Nextera XT	12	Strict	Read deduplication	Single-cell	10518803	6290536	604563	11693	1458	349	24799			0.401892
CHPGO	Strict-Norm-SingleCell	Freshwater_lake_Cyanobacteria	Lake Erie sorted cyanobacteria ER36.Total.D5	Microbial enrichment	Nextera XT	12	Strict	Read normalization	Single-cell	11373515	6147152	479930	14548	1168	315	22484			0.428696
CHPGO	Relaxed-None-Meta	Freshwater_lake_Cyanobacteria	Lake Erie sorted cyanobacteria ER36.Total.D5	Microbial enrichment	Nextera XT	12	Relaxed	None	Metagenome	13120353	6010942	234559	19062	872	311	16939			0.4736
CHPGO	Relaxed-Dedup-Meta	Freshwater_lake_Cyanobacteria	Lake Erie sorted cyanobacteria ER36.Total.D5	Microbial enrichment	Nextera XT	12	Relaxed	Read deduplication	Metagenome	11959197	6146761	229473	15478	1045	333	23022			0.449648
CHPGO	Relaxed-Norm-Meta	Freshwater_lake_Cyanobacteria	Lake Erie sorted cyanobacteria ER36.Total.D5	Microbial enrichment	Nextera XT	12	Relaxed	Read normalization	Metagenome	12851988	5981098	266717	18492	891	310	16939			0.471613
CHPGO	Relaxed-None-SingleCell	Freshwater_lake_Cyanobacteria	Lake Erie sorted cyanobacteria ER36.Total.D5	Microbial enrichment	Nextera XT	12	Relaxed	None	Single-cell	13305453	7417579	668004	16475	1268	322	31701			0.408543
CHPGO	Relaxed-Dedup-SingleCell	Freshwater_lake_Cyanobacteria	Lake Erie sorted cyanobacteria ER36.Total.D5	Microbial enrichment	Nextera XT	12	Relaxed	Read deduplication	Single-cell	12340220	7536452	836102	13409	1635	350	27839			0.374117
CHPGO	Relaxed-Norm-SingleCell	Freshwater_lake_Cyanobacteria	Lake Erie sorted cyanobacteria ER36.Total.D5	Microbial enrichment	Nextera XT	12	Relaxed	Read normalization	Single-cell	13061819	7306550	587340	16212	1270	320	32521			0.409261
CHPGS	Strict-None-Meta	Freshwater_lake_Cyanobacteria	Lake Erie sorted cyanobacteria ER36.Total.B7	Microbial enrichment	Nextera XT	12	Strict	None	Metagenome	26779267	10991902	2286719	43190	724	293	94977			0.423739
CHPGS	Strict-Dedup-Meta	Freshwater_lake_Cyanobacteria	Lake Erie sorted cyanobacteria ER36.Total.B7	Microbial enrichment	Nextera XT	12	Strict	Read deduplication	Metagenome	24051531	11065057	2485350	34876	855	304	123444			0.403275
CHPGS	Strict-Norm-Meta	Freshwater_lake_Cyanobacteria	Lake Erie sorted cyanobacteria ER36.Total.B7	Microbial enrichment	Nextera XT	12	Strict	Read normalization	Metagenome	25999891	11169962	1814732	39967	782	299	71500			0.429347
CHPGS	Strict-None-SingleCell	Freshwater_lake_Cyanobacteria	Lake Erie sorted cyanobacteria ER36.Total.B7	Microbial enrichment	Nextera XT	12	Strict	None	Single-cell	26804872	12483862	2734829	38667	867	301	88663			0.384897
CHPGS	Strict-Dedup-SingleCell	Freshwater_lake_Cyanobacteria	Lake Erie sorted cyanobacteria ER36.Total.B7	Microbial enrichment	Nextera XT	12	Strict	Read deduplication	Single-cell	25256288	12774150	3339187	34170	1022	305	79791			0.370456
CHPGS	Strict-Norm-SingleCell	Freshwater_lake_Cyanobacteria	Lake Erie sorted cyanobacteria ER36.Total.B7	Microbial enrichment	Nextera XT	12	Strict	Read normalization	Single-cell	26115494	12544928	2675078	36397	926	305	76350			0.391351
CHPGS	Relaxed-None-Meta	Freshwater_lake_Cyanobacteria	Lake Erie sorted cyanobacteria ER36.Total.B7	Microbial enrichment	Nextera XT	12	Relaxed	None	Metagenome	26715928	11113827	2243654	42756	733	295	129410			0.42271
CHPGS	Relaxed-Dedup-Meta	Freshwater_lake_Cyanobacteria	Lake Erie sorted cyanobacteria ER36.Total.B7	Microbial enrichment	Nextera XT	12	Relaxed	Read deduplication	Metagenome	23092414	10845978	2472739	32491	884	312	91441			0.388474
CHPGS	Relaxed-Norm-Meta	Freshwater_lake_Cyanobacteria	Lake Erie sorted cyanobacteria ER36.Total.B7	Microbial enrichment	Nextera XT	12	Relaxed	Read normalization	Metagenome	26224558	11322979	1933124	40214	781	300	85963			0.423843
CHPGS	Relaxed-None-SingleCell	Freshwater_lake_Cyanobacteria	Lake Erie sorted cyanobacteria ER36.Total.B7	Microbial enrichment	Nextera XT	12	Relaxed	None	Single-cell	27048639	12700160	2667592	38585	884	304	96496			0.391703
CHPGS	Relaxed-Dedup-SingleCell	Freshwater_lake_Cyanobacteria	Lake Erie sorted cyanobacteria ER36.Total.B7	Microbial enrichment	Nextera XT	12	Relaxed	Read deduplication	Single-cell	24572161	12716195	3523285	32232	1072	312	99109			0.369689
CHPGS	Relaxed-Norm-SingleCell	Freshwater_lake_Cyanobacteria	Lake Erie sorted cyanobacteria ER36.Total.B7	Microbial enrichment	Nextera XT	12	Relaxed	Read normalization	Single-cell	26375022	12819374	2810299	36105	943	309	90495			0.391534
CHPGT	Strict-None-Meta	Freshwater_lake_Cyanobacteria	Lake Erie sorted cyanobacteria ER10.Large.C7	Microbial enrichment	Nextera XT	12	Strict	None	Metagenome	15201749	6691323	1167548	23447	798	295	57457			0.40721
CHPGT	Strict-Dedup-Meta	Freshwater_lake_Cyanobacteria	Lake Erie sorted cyanobacteria ER10.Large.C7	Microbial enrichment	Nextera XT	12	Strict	Read deduplication	Metagenome	13355282	6676928	1203130	18115	999	314	37675			0.406138
CHPGT	Strict-Norm-Meta	Freshwater_lake_Cyanobacteria	Lake Erie sorted cyanobacteria ER10.Large.C7	Microbial enrichment	Nextera XT	12	Strict	Read normalization	Metagenome	15336729	6734403	564802	23416	808	299	33242			0.448797
CHPGT	Strict-None-SingleCell	Freshwater_lake_Cyanobacteria	Lake Erie sorted cyanobacteria ER10.Large.C7	Microbial enrichment	Nextera XT	12	Strict	None	Single-cell	15775453	7778937	1039703	22360	968	300	33242			0.389646
CHPGT	Strict-Dedup-SingleCell	Freshwater_lake_Cyanobacteria	Lake Erie sorted cyanobacteria ER10.Large.C7	Microbial enrichment	Nextera XT	12	Strict	Read deduplication	Single-cell	14157045	7797191	1260756	17676	1272	318	31197			0.368643
CHPGT	Strict-Norm-SingleCell	Freshwater_lake_Cyanobacteria	Lake Erie sorted cyanobacteria ER10.Large.C7	Microbial enrichment	Nextera XT	12	Strict	Read normalization	Single-cell	15713278	7830138	852805	21764	994	305	39560			0.400154
CHPGT	Relaxed-None-Meta	Freshwater_lake_Cyanobacteria	Lake Erie sorted cyanobacteria ER10.Large.C7	Microbial enrichment	Nextera XT	12	Relaxed	None	Metagenome	16022233	7330227	1438189	23843	841	300	48619			0.397823
CHPGT	Relaxed-Dedup-Meta	Freshwater_lake_Cyanobacteria	Lake Erie sorted cyanobacteria ER10.Large.C7	Microbial enrichment	Nextera XT	12	Relaxed	Read deduplication	Metagenome	14146664	7100875	1385248	18825	1006	322	48948			0.397149
CHPGT	Relaxed-Norm-Meta	Freshwater_lake_Cyanobacteria	Lake Erie sorted cyanobacteria ER10.Large.C7	Microbial enrichment	Nextera XT	12	Relaxed	Read normalization	Metagenome	16282321	7363097	808880	24159	839	304	48619			0.434841
CHPGT	Relaxed-None-SingleCell	Freshwater_lake_Cyanobacteria	Lake Erie sorted cyanobacteria ER10.Large.C7	Microbial enrichment	Nextera XT	12	Relaxed	None	Single-cell	16713348	8442176	1250527	23056	1020	306	43184			0.390104
CHPGT	Relaxed-Dedup-SingleCell	Freshwater_lake_Cyanobacteria	Lake Erie sorted cyanobacteria ER10.Large.C7	Microbial enrichment	Nextera XT	12	Relaxed	Read deduplication	Single-cell	15181565	8462588	1506449	18634	1291	326	38478			0.366754
CHPGT	Relaxed-Norm-SingleCell	Freshwater_lake_Cyanobacteria	Lake Erie sorted cyanobacteria ER10.Large.C7	Microbial enrichment	Nextera XT	12	Relaxed	Read normalization	Single-cell	16658709	8480984	1060179	22354	1035	312	35490			0.399591
CHPGU	Strict-None-Meta	Freshwater_lake_Cyanobacteria	Lake Erie sorted cyanobacteria ER36.Total.D7	Microbial enrichment	Nextera XT	12	Strict	None	Metagenome	20841881	8677301	2361007	31603	759	302	136508			0.419649
CHPGU	Strict-Dedup-Meta	Freshwater_lake_Cyanobacteria	Lake Erie sorted cyanobacteria ER36.Total.D7	Microbial enrichment	Nextera XT	12	Strict	Read deduplication	Metagenome	18740933	8879121	2404585	25357	921	322	142254			0.409303
CHPGU	Strict-Norm-Meta	Freshwater_lake_Cyanobacteria	Lake Erie sorted cyanobacteria ER36.Total.D7	Microbial enrichment	Nextera XT	12	Strict	Read normalization	Metagenome	20690757	8648211	2361025	31298	762	302	136508			0.418192
CHPGU	Strict-None-SingleCell	Freshwater_lake_Cyanobacteria	Lake Erie sorted cyanobacteria ER36.Total.D7	Microbial enrichment	Nextera XT	12	Strict	None	Single-cell	21450470	10476647	2963984	28893	952	310	100270			0.382906
CHPGU	Strict-Dedup-SingleCell	Freshwater_lake_Cyanobacteria	Lake Erie sorted cyanobacteria ER36.Total.D7	Microbial enrichment	Nextera XT	12	Strict	Read deduplication	Single-cell	19599809	10503600	3488376	23536	1160	332	129506			0.352678
CHPGU	Strict-Norm-SingleCell	Freshwater_lake_Cyanobacteria	Lake Erie sorted cyanobacteria ER36.Total.D7	Microbial enrichment	Nextera XT	12	Strict	Read normalization	Single-cell	21543974	10361130	2486341	30009	926	307	66451			0.39978
CHPGU	Relaxed-None-Meta	Freshwater_lake_Cyanobacteria	Lake Erie sorted cyanobacteria ER36.Total.D7	Microbial enrichment	Nextera XT	12	Relaxed	None	Metagenome	25076811	10988675	2512370	36411	825	310	144902			0.444906
CHPGU	Relaxed-Dedup-Meta	Freshwater_lake_Cyanobacteria	Lake Erie sorted cyanobacteria ER36.Total.D7	Microbial enrichment	Nextera XT	12	Relaxed	Read deduplication	Metagenome	22864470	11029282	2628036	30186	947	330	156567			0.428681
CHPGU	Relaxed-Norm-Meta	Freshwater_lake_Cyanobacteria	Lake Erie sorted cyanobacteria ER36.Total.D7	Microbial enrichment	Nextera XT	12	Relaxed	Read normalization	Metagenome	24620042	10932572	2463672	35467	838	310	150627			0.446769
CHPGU	Relaxed-None-SingleCell	Freshwater_lake_Cyanobacteria	Lake Erie sorted cyanobacteria ER36.Total.D7	Microbial enrichment	Nextera XT	12	Relaxed	None	Single-cell	26076689	13418921	2951970	33389	1057	321	80353			0.409762
CHPGU	Relaxed-Dedup-SingleCell	Freshwater_lake_Cyanobacteria	Lake Erie sorted cyanobacteria ER36.Total.D7	Microbial enrichment	Nextera XT	12	Relaxed	Read deduplication	Single-cell	24164948	13571040	3460985	27757	1263	344	96002			0.386222
CHPGU	Relaxed-Norm-SingleCell	Freshwater_lake_Cyanobacteria	Lake Erie sorted cyanobacteria ER36.Total.D7	Microbial enrichment	Nextera XT	12	Relaxed	Read normalization	Single-cell	25645203	13283424	2763042	33187	1068	318	80353			0.413251
CHPGX	Strict-None-Meta	Freshwater_lake_Cyanobacteria	Lake Superior sorted cyanobacteria SU02.SRF.Total.B5	Microbial enrichment	Nextera XT	12	Strict	None	Metagenome	22764887	8241569	551019	39118	635	291	29250			0.460137
CHPGX	Strict-Dedup-Meta	Freshwater_lake_Cyanobacteria	Lake Superior sorted cyanobacteria SU02.SRF.Total.B5	Microbial enrichment	Nextera XT	12	Strict	Read deduplication	Metagenome	19419072	8261988	493873	29513	780	307	29947			0.444771
CHPGX	Strict-Norm-Meta	Freshwater_lake_Cyanobacteria	Lake Superior sorted cyanobacteria SU02.SRF.Total.B5	Microbial enrichment	Nextera XT	12	Strict	Read normalization	Metagenome	22609791	8294146	381194	38240	652	293	29306			0.465589
CHPGX	Strict-None-SingleCell	Freshwater_lake_Cyanobacteria	Lake Superior sorted cyanobacteria SU02.SRF.Total.B5	Microbial enrichment	Nextera XT	12	Strict	None	Single-cell	23365792	9580691	930755	36800	719	297	30543			0.41517
CHPGX	Strict-Dedup-SingleCell	Freshwater_lake_Cyanobacteria	Lake Superior sorted cyanobacteria SU02.SRF.Total.B5	Microbial enrichment	Nextera XT	12	Strict	Read deduplication	Single-cell	20614076	9786082	1780280	28685	904	311	37212			0.376921
CHPGX	Strict-Norm-SingleCell	Freshwater_lake_Cyanobacteria	Lake Superior sorted cyanobacteria SU02.SRF.Total.B5	Microbial enrichment	Nextera XT	12	Strict	Read normalization	Single-cell	23418216	9563483	949244	37915	713	294	31942			0.420487
CHPGX	Relaxed-None-Meta	Freshwater_lake_Cyanobacteria	Lake Superior sorted cyanobacteria SU02.SRF.Total.B5	Microbial enrichment	Nextera XT	12	Relaxed	None	Metagenome	23941271	8654540	533361	40898	640	293	27638			0.466189
CHPGX	Relaxed-Dedup-Meta	Freshwater_lake_Cyanobacteria	Lake Superior sorted cyanobacteria SU02.SRF.Total.B5	Microbial enrichment	Nextera XT	12	Relaxed	Read deduplication	Metagenome	20029643	8525274	615972	29937	785	314	27638			0.446816
CHPGX	Relaxed-Norm-Meta	Freshwater_lake_Cyanobacteria	Lake Superior sorted cyanobacteria SU02.SRF.Total.B5	Microbial enrichment	Nextera XT	12	Relaxed	Read normalization	Metagenome	23693181	8755196	421566	39617	666	295	32079			0.477015
CHPGX	Relaxed-None-SingleCell	Freshwater_lake_Cyanobacteria	Lake Superior sorted cyanobacteria SU02.SRF.Total.B5	Microbial enrichment	Nextera XT	12	Relaxed	None	Single-cell	24650126	9978544	903180	38858	714	300	37227			0.432559
CHPGX	Relaxed-Dedup-SingleCell	Freshwater_lake_Cyanobacteria	Lake Superior sorted cyanobacteria SU02.SRF.Total.B5	Microbial enrichment	Nextera XT	12	Relaxed	Read deduplication	Single-cell	21531822	10166047	1765313	29890	900	317	30002			0.396402
CHPGX	Relaxed-Norm-SingleCell	Freshwater_lake_Cyanobacteria	Lake Superior sorted cyanobacteria SU02.SRF.Total.B5	Microbial enrichment	Nextera XT	12	Relaxed	Read normalization	Single-cell	24179909	10066768	1009659	37250	739	301	32079			0.433317
CHPGY	Strict-None-Meta	Freshwater_lake_Cyanobacteria	Lake Superior sorted cyanobacteria SU02.SRF.Total.C5	Microbial enrichment	Nextera XT	12	Strict	None	Metagenome	14515831	5850411	151355	23494	714	294	28489			0.461307
CHPGY	Strict-Dedup-Meta	Freshwater_lake_Cyanobacteria	Lake Superior sorted cyanobacteria SU02.SRF.Total.C5	Microbial enrichment	Nextera XT	12	Strict	Read deduplication	Metagenome	12638351	5960811	252905	17962	902	314	22574			0.43766
CHPGY	Strict-Norm-Meta	Freshwater_lake_Cyanobacteria	Lake Superior sorted cyanobacteria SU02.SRF.Total.C5	Microbial enrichment	Nextera XT	12	Strict	Read normalization	Metagenome	14447277	5865944	171668	23287	719	294	28489			0.462927
CHPGY	Strict-None-SingleCell	Freshwater_lake_Cyanobacteria	Lake Superior sorted cyanobacteria SU02.SRF.Total.C5	Microbial enrichment	Nextera XT	12	Strict	None	Single-cell	14758301	7065327	685147	21182	907	299	23700			0.379032
CHPGY	Strict-Dedup-SingleCell	Freshwater_lake_Cyanobacteria	Lake Superior sorted cyanobacteria SU02.SRF.Total.C5	Microbial enrichment	Nextera XT	12	Strict	Read deduplication	Single-cell	13108406	7231108	1512657	15944	1323	322	32601			0.326616
CHPGY	Strict-Norm-SingleCell	Freshwater_lake_Cyanobacteria	Lake Superior sorted cyanobacteria SU02.SRF.Total.C5	Microbial enrichment	Nextera XT	12	Strict	Read normalization	Single-cell	14725604	7007472	678994	21213	892	299	27281			0.382962
CHPGY	Relaxed-None-Meta	Freshwater_lake_Cyanobacteria	Lake Superior sorted cyanobacteria SU02.SRF.Total.C5	Microbial enrichment	Nextera XT	12	Relaxed	None	Metagenome	15986219	6307558	313466	25996	702	296	30319			0.461233
CHPGY	Relaxed-Dedup-Meta	Freshwater_lake_Cyanobacteria	Lake Superior sorted cyanobacteria SU02.SRF.Total.C5	Microbial enrichment	Nextera XT	12	Relaxed	Read deduplication	Metagenome	13695139	6148711	263603	19665	849	320	23269			0.434673
CHPGY	Relaxed-Norm-Meta	Freshwater_lake_Cyanobacteria	Lake Superior sorted cyanobacteria SU02.SRF.Total.C5	Microbial enrichment	Nextera XT	12	Relaxed	Read normalization	Metagenome	15774785	6341814	224616	25456	716	296	27628			0.464943
CHPGY	Relaxed-None-SingleCell	Freshwater_lake_Cyanobacteria	Lake Superior sorted cyanobacteria SU02.SRF.Total.C5	Microbial enrichment	Nextera XT	12	Relaxed	None	Single-cell	16256886	7433422	747560	23600	841	303	24640			0.384694
CHPGY	Relaxed-Dedup-SingleCell	Freshwater_lake_Cyanobacteria	Lake Superior sorted cyanobacteria SU02.SRF.Total.C5	Microbial enrichment	Nextera XT	12	Relaxed	Read deduplication	Single-cell	14462940	7521314	1589936	18355	1097	326	41973			0.335513
CHPGY	Relaxed-Norm-SingleCell	Freshwater_lake_Cyanobacteria	Lake Superior sorted cyanobacteria SU02.SRF.Total.C5	Microbial enrichment	Nextera XT	12	Relaxed	Read normalization	Single-cell	16087363	7400169	787988	23477	849	301	26319			0.383154
CHPGZ	Strict-None-Meta	Freshwater_lake_Cyanobacteria	Lake Superior sorted cyanobacteria SU02.SRF.Total.D5	Microbial enrichment	Nextera XT	12	Strict	None	Metagenome	22474009	8822895	407619	36815	708	294	27968			0.477804
CHPGZ	Strict-Dedup-Meta	Freshwater_lake_Cyanobacteria	Lake Superior sorted cyanobacteria SU02.SRF.Total.D5	Microbial enrichment	Nextera XT	12	Strict	Read deduplication	Metagenome	19538553	8813769	382160	28386	853	314	29355			0.457625
CHPGZ	Strict-Norm-Meta	Freshwater_lake_Cyanobacteria	Lake Superior sorted cyanobacteria SU02.SRF.Total.D5	Microbial enrichment	Nextera XT	12	Strict	Read normalization	Metagenome	22446499	8888884	302730	36325	721	296	27795			0.487736
CHPGZ	Strict-None-SingleCell	Freshwater_lake_Cyanobacteria	Lake Superior sorted cyanobacteria SU02.SRF.Total.D5	Microbial enrichment	Nextera XT	12	Strict	None	Single-cell	23045497	10197716	665302	34436	815	301	29400			0.432721
CHPGZ	Strict-Dedup-SingleCell	Freshwater_lake_Cyanobacteria	Lake Superior sorted cyanobacteria SU02.SRF.Total.D5	Microbial enrichment	Nextera XT	12	Strict	Read deduplication	Single-cell	20615964	10421652	1569441	27090	1022	320	39811			0.397587
CHPGZ	Strict-Norm-SingleCell	Freshwater_lake_Cyanobacteria	Lake Superior sorted cyanobacteria SU02.SRF.Total.D5	Microbial enrichment	Nextera XT	12	Strict	Read normalization	Single-cell	22848779	10306587	769430	33506	835	303	29455			0.428993
CHPGZ	Relaxed-None-Meta	Freshwater_lake_Cyanobacteria	Lake Superior sorted cyanobacteria SU02.SRF.Total.D5	Microbial enrichment	Nextera XT	12	Relaxed	None	Metagenome	23824731	9636601	529616	38225	732	297	30497			0.461448
CHPGZ	Relaxed-Dedup-Meta	Freshwater_lake_Cyanobacteria	Lake Superior sorted cyanobacteria SU02.SRF.Total.D5	Microbial enrichment	Nextera XT	12	Relaxed	Read deduplication	Metagenome	20507444	9488787	493011	28953	888	320	27968			0.452324
CHPGZ	Relaxed-Norm-Meta	Freshwater_lake_Cyanobacteria	Lake Superior sorted cyanobacteria SU02.SRF.Total.D5	Microbial enrichment	Nextera XT	12	Relaxed	Read normalization	Metagenome	23751152	9727083	493505	37596	748	299	30157			0.474927
CHPGZ	Relaxed-None-SingleCell	Freshwater_lake_Cyanobacteria	Lake Superior sorted cyanobacteria SU02.SRF.Total.D5	Microbial enrichment	Nextera XT	12	Relaxed	None	Single-cell	24547064	11086147	852561	36055	841	304	29387			0.437666
CHPGZ	Relaxed-Dedup-SingleCell	Freshwater_lake_Cyanobacteria	Lake Superior sorted cyanobacteria SU02.SRF.Total.D5	Microbial enrichment	Nextera XT	12	Relaxed	Read deduplication	Single-cell	21884959	11197733	1706791	28341	1040	325	44283			0.402993
CHPGZ	Relaxed-Norm-SingleCell	Freshwater_lake_Cyanobacteria	Lake Superior sorted cyanobacteria SU02.SRF.Total.D5	Microbial enrichment	Nextera XT	12	Relaxed	Read normalization	Single-cell	24433341	11055395	775285	36363	841	302	29147			0.436344
CHPHB	Strict-None-Meta	Freshwater_lake_Cyanobacteria	Lake Superior sorted cyanobacteria SU02.DCL.Total.B7	Microbial enrichment	Nextera XT	12	Strict	None	Metagenome	25764978	9639547	820612	43666	654	291	28137			0.454779
CHPHB	Strict-Dedup-Meta	Freshwater_lake_Cyanobacteria	Lake Superior sorted cyanobacteria SU02.DCL.Total.B7	Microbial enrichment	Nextera XT	12	Strict	Read deduplication	Metagenome	22095341	9681683	914971	33382	800	306	36450			0.437786
CHPHB	Strict-Norm-Meta	Freshwater_lake_Cyanobacteria	Lake Superior sorted cyanobacteria SU02.DCL.Total.B7	Microbial enrichment	Nextera XT	12	Strict	Read normalization	Metagenome	25744641	9817346	518627	42577	687	294	27684			0.476275
CHPHB	Strict-None-SingleCell	Freshwater_lake_Cyanobacteria	Lake Superior sorted cyanobacteria SU02.DCL.Total.B7	Microbial enrichment	Nextera XT	12	Strict	None	Single-cell	26551045	11018789	1117238	41828	737	296	40991			0.427965
CHPHB	Strict-Dedup-SingleCell	Freshwater_lake_Cyanobacteria	Lake Superior sorted cyanobacteria SU02.DCL.Total.B7	Microbial enrichment	Nextera XT	12	Strict	Read deduplication	Single-cell	23737638	11254208	1784671	33708	901	307	49055			0.401909
CHPHB	Strict-Norm-SingleCell	Freshwater_lake_Cyanobacteria	Lake Superior sorted cyanobacteria SU02.DCL.Total.B7	Microbial enrichment	Nextera XT	12	Strict	Read normalization	Single-cell	26138505	11192409	1184801	39769	767	300	40025			0.42478
CHPHB	Relaxed-None-Meta	Freshwater_lake_Cyanobacteria	Lake Superior sorted cyanobacteria SU02.DCL.Total.B7	Microbial enrichment	Nextera XT	12	Relaxed	None	Metagenome	26490370	9972881	933556	44527	669	293	28875			0.454926
CHPHB	Relaxed-Dedup-Meta	Freshwater_lake_Cyanobacteria	Lake Superior sorted cyanobacteria SU02.DCL.Total.B7	Microbial enrichment	Nextera XT	12	Relaxed	Read deduplication	Metagenome	22343313	9714293	1175068	33146	803	312	29903			0.437069
CHPHB	Relaxed-Norm-Meta	Freshwater_lake_Cyanobacteria	Lake Superior sorted cyanobacteria SU02.DCL.Total.B7	Microbial enrichment	Nextera XT	12	Relaxed	Read normalization	Metagenome	26485924	10225174	630488	43399	699	296	34322			0.4717
CHPHB	Relaxed-None-SingleCell	Freshwater_lake_Cyanobacteria	Lake Superior sorted cyanobacteria SU02.DCL.Total.B7	Microbial enrichment	Nextera XT	12	Relaxed	None	Single-cell	27342571	11381783	1122612	42862	747	298	37623			0.43879
CHPHB	Relaxed-Dedup-SingleCell	Freshwater_lake_Cyanobacteria	Lake Superior sorted cyanobacteria SU02.DCL.Total.B7	Microbial enrichment	Nextera XT	12	Relaxed	Read deduplication	Single-cell	24160203	11461951	1875119	33858	909	314	40604			0.405026
CHPHB	Relaxed-Norm-SingleCell	Freshwater_lake_Cyanobacteria	Lake Superior sorted cyanobacteria SU02.DCL.Total.B7	Microbial enrichment	Nextera XT	12	Relaxed	Read normalization	Single-cell	27113861	11465957	1119952	42027	761	300	37607			0.433763
CHPHC	Strict-None-Meta	Freshwater_lake_Cyanobacteria	Lake Superior sorted cyanobacteria SU02.DCL.Total.C7	Microbial enrichment	Nextera XT	12	Strict	None	Metagenome	19111964	7609634	586640	30938	708	294	33412			0.452348
CHPHC	Strict-Dedup-Meta	Freshwater_lake_Cyanobacteria	Lake Superior sorted cyanobacteria SU02.DCL.Total.C7	Microbial enrichment	Nextera XT	12	Strict	Read deduplication	Metagenome	16423685	7660050	657681	23181	894	314	27708			0.428215
CHPHC	Strict-Norm-Meta	Freshwater_lake_Cyanobacteria	Lake Superior sorted cyanobacteria SU02.DCL.Total.C7	Microbial enrichment	Nextera XT	12	Strict	Read normalization	Metagenome	19114827	7641078	465315	30716	718	295	27708			0.460424
CHPHC	Strict-None-SingleCell	Freshwater_lake_Cyanobacteria	Lake Superior sorted cyanobacteria SU02.DCL.Total.C7	Microbial enrichment	Nextera XT	12	Strict	None	Single-cell	19649647	8746483	1153921	29096	806	300	31933			0.396229
CHPHC	Strict-Dedup-SingleCell	Freshwater_lake_Cyanobacteria	Lake Superior sorted cyanobacteria SU02.DCL.Total.C7	Microbial enrichment	Nextera XT	12	Strict	Read deduplication	Single-cell	17413526	8993493	1869694	22306	1071	321	39082			0.361714
CHPHC	Strict-Norm-SingleCell	Freshwater_lake_Cyanobacteria	Lake Superior sorted cyanobacteria SU02.DCL.Total.C7	Microbial enrichment	Nextera XT	12	Strict	Read normalization	Single-cell	19554895	8783301	1101286	28758	821	301	32900			0.395446
CHPHC	Relaxed-None-Meta	Freshwater_lake_Cyanobacteria	Lake Superior sorted cyanobacteria SU02.DCL.Total.C7	Microbial enrichment	Nextera XT	12	Relaxed	None	Metagenome	20624054	8331290	670702	32982	722	297	41437			0.454867
CHPHC	Relaxed-Dedup-Meta	Freshwater_lake_Cyanobacteria	Lake Superior sorted cyanobacteria SU02.DCL.Total.C7	Microbial enrichment	Nextera XT	12	Relaxed	Read deduplication	Metagenome	17678326	8188175	831872	24710	887	320	32138			0.438403
CHPHC	Relaxed-Norm-Meta	Freshwater_lake_Cyanobacteria	Lake Superior sorted cyanobacteria SU02.DCL.Total.C7	Microbial enrichment	Nextera XT	12	Relaxed	Read normalization	Metagenome	20528807	8362598	583860	32471	738	299	33867			0.462862
CHPHC	Relaxed-None-SingleCell	Freshwater_lake_Cyanobacteria	Lake Superior sorted cyanobacteria SU02.DCL.Total.C7	Microbial enrichment	Nextera XT	12	Relaxed	None	Single-cell	21266609	9460287	1097407	31304	816	304	33208			0.414488
CHPHC	Relaxed-Dedup-SingleCell	Freshwater_lake_Cyanobacteria	Lake Superior sorted cyanobacteria SU02.DCL.Total.C7	Microbial enrichment	Nextera XT	12	Relaxed	Read deduplication	Single-cell	18881252	9672519	1952892	24301	1047	325	45862			0.380902
CHPHC	Relaxed-Norm-SingleCell	Freshwater_lake_Cyanobacteria	Lake Superior sorted cyanobacteria SU02.DCL.Total.C7	Microbial enrichment	Nextera XT	12	Relaxed	Read normalization	Single-cell	21109947	9451238	1008159	31395	818	302	34405			0.416063
CHPHG	Strict-None-Meta	Freshwater_lake_Cyanobacteria	Lake Superior sorted cyanobacteria SU02.DCL.Total.D7	Microbial enrichment	Nextera XT	12	Strict	None	Metagenome	22247457	9427700	792675	34773	776	296	27708			0.453176
CHPHG	Strict-Dedup-Meta	Freshwater_lake_Cyanobacteria	Lake Superior sorted cyanobacteria SU02.DCL.Total.D7	Microbial enrichment	Nextera XT	12	Strict	Read deduplication	Metagenome	19425668	9504288	813251	26560	965	317	27708			0.437989
CHPHG	Strict-Norm-Meta	Freshwater_lake_Cyanobacteria	Lake Superior sorted cyanobacteria SU02.DCL.Total.D7	Microbial enrichment	Nextera XT	12	Strict	Read normalization	Metagenome	22273358	9506459	597574	34464	787	297	27708			0.458409
CHPHG	Strict-None-SingleCell	Freshwater_lake_Cyanobacteria	Lake Superior sorted cyanobacteria SU02.DCL.Total.D7	Microbial enrichment	Nextera XT	12	Strict	None	Single-cell	23027987	10802614	1254436	33074	881	303	30660			0.415007
CHPHG	Strict-Dedup-SingleCell	Freshwater_lake_Cyanobacteria	Lake Superior sorted cyanobacteria SU02.DCL.Total.D7	Microbial enrichment	Nextera XT	12	Strict	Read deduplication	Single-cell	20534306	10876371	2007650	25741	1131	325	44952			0.385197
CHPHG	Strict-Norm-SingleCell	Freshwater_lake_Cyanobacteria	Lake Superior sorted cyanobacteria SU02.DCL.Total.D7	Microbial enrichment	Nextera XT	12	Strict	Read normalization	Single-cell	22869984	10804693	1251694	32476	894	304	28675			0.40958
CHPHG	Relaxed-None-Meta	Freshwater_lake_Cyanobacteria	Lake Superior sorted cyanobacteria SU02.DCL.Total.D7	Microbial enrichment	Nextera XT	12	Relaxed	None	Metagenome	24461198	10810714	928933	37046	812	301	33557			0.44089
CHPHG	Relaxed-Dedup-Meta	Freshwater_lake_Cyanobacteria	Lake Superior sorted cyanobacteria SU02.DCL.Total.D7	Microbial enrichment	Nextera XT	12	Relaxed	Read deduplication	Metagenome	21458027	10693827	1033710	28538	994	324	31543			0.426386
CHPHG	Relaxed-Norm-Meta	Freshwater_lake_Cyanobacteria	Lake Superior sorted cyanobacteria SU02.DCL.Total.D7	Microbial enrichment	Nextera XT	12	Relaxed	Read normalization	Metagenome	24382039	10851374	739281	36601	827	302	41874			0.454181
CHPHG	Relaxed-None-SingleCell	Freshwater_lake_Cyanobacteria	Lake Superior sorted cyanobacteria SU02.DCL.Total.D7	Microbial enrichment	Nextera XT	12	Relaxed	None	Single-cell	25495651	12247177	1107544	35825	927	307	34971			0.418444
CHPHG	Relaxed-Dedup-SingleCell	Freshwater_lake_Cyanobacteria	Lake Superior sorted cyanobacteria SU02.DCL.Total.D7	Microbial enrichment	Nextera XT	12	Relaxed	Read deduplication	Single-cell	22940905	12361378	1967389	28291	1166	331	49091			0.388647
CHPHG	Relaxed-Norm-SingleCell	Freshwater_lake_Cyanobacteria	Lake Superior sorted cyanobacteria SU02.DCL.Total.D7	Microbial enrichment	Nextera XT	12	Relaxed	Read normalization	Single-cell	25066285	12204041	1513889	34547	951	309	31769			0.409674
CHPHN	Strict-None-Meta	Freshwater_lake_Cyanobacteria	Lake Michigan sorted cyanobacteria MI23.DCL.Total.B5	Microbial enrichment	Nextera XT	12	Strict	None	Metagenome	74422454	34928549	5499439	106575	890	302	95817			0.404027
CHPHN	Strict-Dedup-Meta	Freshwater_lake_Cyanobacteria	Lake Michigan sorted cyanobacteria MI23.DCL.Total.B5	Microbial enrichment	Nextera XT	12	Strict	Read deduplication	Metagenome	65386261	34663974	6349642	81858	1121	324	84912			0.392461
CHPHN	Strict-Norm-Meta	Freshwater_lake_Cyanobacteria	Lake Michigan sorted cyanobacteria MI23.DCL.Total.B5	Microbial enrichment	Nextera XT	12	Strict	Read normalization	Metagenome	74196858	35101611	5209892	105442	903	303	95817			0.400534
CHPHN	Strict-None-SingleCell	Freshwater_lake_Cyanobacteria	Lake Michigan sorted cyanobacteria MI23.DCL.Total.B5	Microbial enrichment	Nextera XT	12	Strict	None	Single-cell	76189626	41322464	8822411	95622	1199	312	88244			0.377411
CHPHN	Strict-Dedup-SingleCell	Freshwater_lake_Cyanobacteria	Lake Michigan sorted cyanobacteria MI23.DCL.Total.B5	Microbial enrichment	Nextera XT	12	Strict	Read deduplication	Single-cell	70033871	42767895	10255509	75357	1598	339	145797			0.361347
CHPHN	Strict-Norm-SingleCell	Freshwater_lake_Cyanobacteria	Lake Michigan sorted cyanobacteria MI23.DCL.Total.B5	Microbial enrichment	Nextera XT	12	Strict	Read normalization	Single-cell	75783959	41315690	8819919	94401	1210	313	88244			0.376467
CHPHN	Relaxed-None-Meta	Freshwater_lake_Cyanobacteria	Lake Michigan sorted cyanobacteria MI23.DCL.Total.B5	Microbial enrichment	Nextera XT	12	Relaxed	None	Metagenome	78720627	37059985	6863631	112269	892	304	110945			0.392598
CHPHN	Relaxed-Dedup-Meta	Freshwater_lake_Cyanobacteria	Lake Michigan sorted cyanobacteria MI23.DCL.Total.B5	Microbial enrichment	Nextera XT	12	Relaxed	Read deduplication	Metagenome	68347436	35691406	7360563	85748	1090	328	110944			0.387753
CHPHN	Relaxed-Norm-Meta	Freshwater_lake_Cyanobacteria	Lake Michigan sorted cyanobacteria MI23.DCL.Total.B5	Microbial enrichment	Nextera XT	12	Relaxed	Read normalization	Metagenome	78535719	37422443	6275034	110768	912	306	110945			0.403674
CHPHN	Relaxed-None-SingleCell	Freshwater_lake_Cyanobacteria	Lake Michigan sorted cyanobacteria MI23.DCL.Total.B5	Microbial enrichment	Nextera XT	12	Relaxed	None	Single-cell	80849402	43581481	10416963	101516	1177	314	182114			0.37507
CHPHN	Relaxed-Dedup-SingleCell	Freshwater_lake_Cyanobacteria	Lake Michigan sorted cyanobacteria MI23.DCL.Total.B5	Microbial enrichment	Nextera XT	12	Relaxed	Read deduplication	Single-cell	73976027	44300371	11658795	80616	1536	341	154146			0.355591
CHPHN	Relaxed-Norm-SingleCell	Freshwater_lake_Cyanobacteria	Lake Michigan sorted cyanobacteria MI23.DCL.Total.B5	Microbial enrichment	Nextera XT	12	Relaxed	Read normalization	Single-cell	79933744	43579141	10129014	98921	1206	316	182114			0.368672
CHPHO	Strict-None-Meta	Freshwater_lake_Cyanobacteria	Lake Michigan sorted cyanobacteria MI23.DCL.Orng.C5	Microbial enrichment	Nextera XT	12	Strict	None	Metagenome	14592427	5994509	1340593	23546	678	291	44812			0.353082
CHPHO	Strict-Dedup-Meta	Freshwater_lake_Cyanobacteria	Lake Michigan sorted cyanobacteria MI23.DCL.Orng.C5	Microbial enrichment	Nextera XT	12	Strict	Read deduplication	Metagenome	13141275	5901875	1737899	19398	791	301	44840			0.32523
CHPHO	Strict-Norm-Meta	Freshwater_lake_Cyanobacteria	Lake Michigan sorted cyanobacteria MI23.DCL.Orng.C5	Microbial enrichment	Nextera XT	12	Strict	Read normalization	Metagenome	14321679	6102393	1114347	22264	730	295	31304			0.366739
CHPHO	Strict-None-SingleCell	Freshwater_lake_Cyanobacteria	Lake Michigan sorted cyanobacteria MI23.DCL.Orng.C5	Microbial enrichment	Nextera XT	12	Strict	None	Single-cell	14861719	6728558	2366407	21754	817	296	56912			0.329158
CHPHO	Strict-Dedup-SingleCell	Freshwater_lake_Cyanobacteria	Lake Michigan sorted cyanobacteria MI23.DCL.Orng.C5	Microbial enrichment	Nextera XT	12	Strict	Read deduplication	Single-cell	14042658	6838086	2680904	19433	936	301	48606			0.3146
CHPHO	Strict-Norm-SingleCell	Freshwater_lake_Cyanobacteria	Lake Michigan sorted cyanobacteria MI23.DCL.Orng.C5	Microbial enrichment	Nextera XT	12	Strict	Read normalization	Single-cell	14503675	6822218	2362866	20372	880	300	31046			0.334279
CHPHO	Relaxed-None-Meta	Freshwater_lake_Cyanobacteria	Lake Michigan sorted cyanobacteria MI23.DCL.Orng.C5	Microbial enrichment	Nextera XT	12	Relaxed	None	Metagenome	14601568	6052559	1766766	23131	696	293	48628			0.343272
CHPHO	Relaxed-Dedup-Meta	Freshwater_lake_Cyanobacteria	Lake Michigan sorted cyanobacteria MI23.DCL.Orng.C5	Microbial enrichment	Nextera XT	12	Relaxed	Read deduplication	Metagenome	12677209	5836923	1920753	18203	824	308	55992			0.326977
CHPHO	Relaxed-Norm-Meta	Freshwater_lake_Cyanobacteria	Lake Michigan sorted cyanobacteria MI23.DCL.Orng.C5	Microbial enrichment	Nextera XT	12	Relaxed	Read normalization	Metagenome	14534146	6180030	1427662	22494	727	296	36374			0.357838
CHPHO	Relaxed-None-SingleCell	Freshwater_lake_Cyanobacteria	Lake Michigan sorted cyanobacteria MI23.DCL.Orng.C5	Microbial enrichment	Nextera XT	12	Relaxed	None	Single-cell	15080249	6783201	2245788	22111	800	298	69691			0.329119
CHPHO	Relaxed-Dedup-SingleCell	Freshwater_lake_Cyanobacteria	Lake Michigan sorted cyanobacteria MI23.DCL.Orng.C5	Microbial enrichment	Nextera XT	12	Relaxed	Read deduplication	Single-cell	13918325	6751556	2773911	18901	937	308	52583			0.307951
CHPHO	Relaxed-Norm-SingleCell	Freshwater_lake_Cyanobacteria	Lake Michigan sorted cyanobacteria MI23.DCL.Orng.C5	Microbial enrichment	Nextera XT	12	Relaxed	Read normalization	Single-cell	14726260	6846643	2409776	20662	860	303	38880			0.331104
CHPHP	Strict-None-Meta	Freshwater_lake_Cyanobacteria	Lake Michigan sorted cyanobacteria MI23.SRFL.Orng.D5	Microbial enrichment	Nextera XT	12	Strict	None	Metagenome	52697691	25716681	4241124	73894	954	302	163698			0.399694
CHPHP	Strict-Dedup-Meta	Freshwater_lake_Cyanobacteria	Lake Michigan sorted cyanobacteria MI23.SRFL.Orng.D5	Microbial enrichment	Nextera XT	12	Strict	Read deduplication	Metagenome	46172495	25438775	4699952	56247	1230	325	130166			0.375923
CHPHP	Strict-Norm-Meta	Freshwater_lake_Cyanobacteria	Lake Michigan sorted cyanobacteria MI23.SRFL.Orng.D5	Microbial enrichment	Nextera XT	12	Strict	Read normalization	Metagenome	52519677	25708263	4088497	73461	959	302	155593			0.403911
CHPHP	Strict-None-SingleCell	Freshwater_lake_Cyanobacteria	Lake Michigan sorted cyanobacteria MI23.SRFL.Orng.D5	Microbial enrichment	Nextera XT	12	Strict	None	Single-cell	53967558	29919459	7074830	66552	1290	311	130160			0.351726
CHPHP	Strict-Dedup-SingleCell	Freshwater_lake_Cyanobacteria	Lake Michigan sorted cyanobacteria MI23.SRFL.Orng.D5	Microbial enrichment	Nextera XT	12	Strict	Read deduplication	Single-cell	49276802	30049497	9316655	52428	1769	336	130168			0.319671
CHPHP	Strict-Norm-SingleCell	Freshwater_lake_Cyanobacteria	Lake Michigan sorted cyanobacteria MI23.SRFL.Orng.D5	Microbial enrichment	Nextera XT	12	Strict	Read normalization	Single-cell	54105587	29902950	6753567	68214	1282	308	135841			0.36008
CHPHP	Relaxed-None-Meta	Freshwater_lake_Cyanobacteria	Lake Michigan sorted cyanobacteria MI23.SRFL.Orng.D5	Microbial enrichment	Nextera XT	12	Relaxed	None	Metagenome	56311432	27482320	5061089	78895	951	304	223064			0.397642
CHPHP	Relaxed-Dedup-Meta	Freshwater_lake_Cyanobacteria	Lake Michigan sorted cyanobacteria MI23.SRFL.Orng.D5	Microbial enrichment	Nextera XT	12	Relaxed	Read deduplication	Metagenome	48587636	26404994	5413108	59401	1188	329	131596			0.384174
CHPHP	Relaxed-Norm-Meta	Freshwater_lake_Cyanobacteria	Lake Michigan sorted cyanobacteria MI23.SRFL.Orng.D5	Microbial enrichment	Nextera XT	12	Relaxed	Read normalization	Metagenome	55924877	27584974	4791629	77625	974	305	124130			0.401662
CHPHP	Relaxed-None-SingleCell	Freshwater_lake_Cyanobacteria	Lake Michigan sorted cyanobacteria MI23.SRFL.Orng.D5	Microbial enrichment	Nextera XT	12	Relaxed	None	Single-cell	57988417	31756317	7531553	71954	1253	314	134621			0.360129
CHPHP	Relaxed-Dedup-SingleCell	Freshwater_lake_Cyanobacteria	Lake Michigan sorted cyanobacteria MI23.SRFL.Orng.D5	Microbial enrichment	Nextera XT	12	Relaxed	Read deduplication	Single-cell	52538899	31602591	9754470	56363	1707	339	161832			0.320095
CHPHP	Relaxed-Norm-SingleCell	Freshwater_lake_Cyanobacteria	Lake Michigan sorted cyanobacteria MI23.SRFL.Orng.D5	Microbial enrichment	Nextera XT	12	Relaxed	Read normalization	Single-cell	57306902	31711239	7498017	70300	1287	315	142103			0.361545
CHPHT	Strict-None-Meta	Freshwater_lake_Cyanobacteria	Lake Michigan sorted cyanobacteria MI23.SRFL.Total.B7	Microbial enrichment	Nextera XT	12	Strict	None	Metagenome	68909637	32616933	4633052	99969	900	300	110748			0.411454
CHPHT	Strict-Dedup-Meta	Freshwater_lake_Cyanobacteria	Lake Michigan sorted cyanobacteria MI23.SRFL.Total.B7	Microbial enrichment	Nextera XT	12	Strict	Read deduplication	Metagenome	60333309	31667472	5402107	77763	1109	317	110502			0.393018
CHPHT	Strict-Norm-Meta	Freshwater_lake_Cyanobacteria	Lake Michigan sorted cyanobacteria MI23.SRFL.Total.B7	Microbial enrichment	Nextera XT	12	Strict	Read normalization	Metagenome	68458502	32865310	4459893	97640	926	302	114310			0.42044
CHPHT	Strict-None-SingleCell	Freshwater_lake_Cyanobacteria	Lake Michigan sorted cyanobacteria MI23.SRFL.Total.B7	Microbial enrichment	Nextera XT	12	Strict	None	Single-cell	70147328	36896904	7380824	90861	1122	309	106358			0.372683
CHPHT	Strict-Dedup-SingleCell	Freshwater_lake_Cyanobacteria	Lake Michigan sorted cyanobacteria MI23.SRFL.Total.B7	Microbial enrichment	Nextera XT	12	Strict	Read deduplication	Single-cell	64551510	37208890	9600834	75024	1437	322	122659			0.348406
CHPHT	Strict-Norm-SingleCell	Freshwater_lake_Cyanobacteria	Lake Michigan sorted cyanobacteria MI23.SRFL.Total.B7	Microbial enrichment	Nextera XT	12	Strict	Read normalization	Single-cell	69620208	37027204	7464277	89157	1154	310	98704			0.374251
CHPHT	Relaxed-None-Meta	Freshwater_lake_Cyanobacteria	Lake Michigan sorted cyanobacteria MI23.SRFL.Total.B7	Microbial enrichment	Nextera XT	12	Relaxed	None	Metagenome	70723359	33509794	5162083	102532	898	301	110536			0.402173
CHPHT	Relaxed-Dedup-Meta	Freshwater_lake_Cyanobacteria	Lake Michigan sorted cyanobacteria MI23.SRFL.Total.B7	Microbial enrichment	Nextera XT	12	Relaxed	Read deduplication	Metagenome	60734353	31506513	6438281	77954	1080	322	262493			0.382831
CHPHT	Relaxed-Norm-Meta	Freshwater_lake_Cyanobacteria	Lake Michigan sorted cyanobacteria MI23.SRFL.Total.B7	Microbial enrichment	Nextera XT	12	Relaxed	Read normalization	Metagenome	70360201	33921116	4971802	99967	932	303	110403			0.406229
CHPHT	Relaxed-None-SingleCell	Freshwater_lake_Cyanobacteria	Lake Michigan sorted cyanobacteria MI23.SRFL.Total.B7	Microbial enrichment	Nextera XT	12	Relaxed	None	Single-cell	72716369	37949292	7977284	94736	1103	310	94335			0.372547
CHPHT	Relaxed-Dedup-SingleCell	Freshwater_lake_Cyanobacteria	Lake Michigan sorted cyanobacteria MI23.SRFL.Total.B7	Microbial enrichment	Nextera XT	12	Relaxed	Read deduplication	Single-cell	65697536	37347267	10346006	76474	1379	327	114747			0.345607
CHPHT	Relaxed-Norm-SingleCell	Freshwater_lake_Cyanobacteria	Lake Michigan sorted cyanobacteria MI23.SRFL.Total.B7	Microbial enrichment	Nextera XT	12	Relaxed	Read normalization	Single-cell	71584256	38066649	8178118	91175	1150	313	95122			0.377545
CHPHU	Strict-None-Meta	Freshwater_lake_Cyanobacteria	Lake Michigan sorted cyanobacteria MI23.DCL.RED.C7	Microbial enrichment	Nextera XT	12	Strict	None	Metagenome	74203901	32015364	6964379	113584	775	297	91707			0.397454
CHPHU	Strict-Dedup-Meta	Freshwater_lake_Cyanobacteria	Lake Michigan sorted cyanobacteria MI23.DCL.RED.C7	Microbial enrichment	Nextera XT	12	Strict	Read deduplication	Metagenome	67434712	30793129	6990489	96436	848	307	70421			0.387693
CHPHU	Strict-Norm-Meta	Freshwater_lake_Cyanobacteria	Lake Michigan sorted cyanobacteria MI23.DCL.RED.C7	Microbial enrichment	Nextera XT	12	Strict	Read normalization	Metagenome	73012080	32399840	6141781	108394	816	302	96794			0.408162
CHPHU	Strict-None-SingleCell	Freshwater_lake_Cyanobacteria	Lake Michigan sorted cyanobacteria MI23.DCL.RED.C7	Microbial enrichment	Nextera XT	12	Strict	None	Single-cell	74321086	36774585	9438277	100732	978	305	118733			0.380619
CHPHU	Strict-Dedup-SingleCell	Freshwater_lake_Cyanobacteria	Lake Michigan sorted cyanobacteria MI23.DCL.RED.C7	Microbial enrichment	Nextera XT	12	Strict	Read deduplication	Single-cell	71267426	37835486	10474105	91281	1142	309	119797			0.376039
CHPHU	Strict-Norm-SingleCell	Freshwater_lake_Cyanobacteria	Lake Michigan sorted cyanobacteria MI23.DCL.RED.C7	Microbial enrichment	Nextera XT	12	Strict	Read normalization	Single-cell	72628454	36832813	9210429	95339	1030	311	124231			0.383947
CHPHU	Relaxed-None-Meta	Freshwater_lake_Cyanobacteria	Lake Michigan sorted cyanobacteria MI23.DCL.RED.C7	Microbial enrichment	Nextera XT	12	Relaxed	None	Metagenome	75246321	32406462	7586376	115187	771	298	78956			0.397435
CHPHU	Relaxed-Dedup-Meta	Freshwater_lake_Cyanobacteria	Lake Michigan sorted cyanobacteria MI23.DCL.RED.C7	Microbial enrichment	Nextera XT	12	Relaxed	Read deduplication	Metagenome	67266223	30257546	7431656	96485	826	311	112489			0.386143
CHPHU	Relaxed-Norm-Meta	Freshwater_lake_Cyanobacteria	Lake Michigan sorted cyanobacteria MI23.DCL.RED.C7	Microbial enrichment	Nextera XT	12	Relaxed	Read normalization	Metagenome	74362760	32896409	6570622	110911	807	302	74121			0.40244
CHPHU	Relaxed-None-SingleCell	Freshwater_lake_Cyanobacteria	Lake Michigan sorted cyanobacteria MI23.DCL.RED.C7	Microbial enrichment	Nextera XT	12	Relaxed	None	Single-cell	76720340	37364580	9700644	105226	948	305	117473			0.380165
CHPHU	Relaxed-Dedup-SingleCell	Freshwater_lake_Cyanobacteria	Lake Michigan sorted cyanobacteria MI23.DCL.RED.C7	Microbial enrichment	Nextera XT	12	Relaxed	Read deduplication	Single-cell	72061206	37340253	10651048	93080	1079	314	234233			0.375421
CHPHU	Relaxed-Norm-SingleCell	Freshwater_lake_Cyanobacteria	Lake Michigan sorted cyanobacteria MI23.DCL.RED.C7	Microbial enrichment	Nextera XT	12	Relaxed	Read normalization	Single-cell	74425104	37567967	9542705	97825	1019	311	138607			0.389195
CHPHW	Strict-None-Meta	Freshwater_lake_Cyanobacteria	Lake Michigan sorted cyanobacteria MI23.SRF.RED.D7	Microbial enrichment	Nextera XT	12	Strict	None	Metagenome	68162475	31989188	5238065	99175	886	300	263011			0.408396
CHPHW	Strict-Dedup-Meta	Freshwater_lake_Cyanobacteria	Lake Michigan sorted cyanobacteria MI23.SRF.RED.D7	Microbial enrichment	Nextera XT	12	Strict	Read deduplication	Metagenome	59789723	31245388	5716749	77408	1089	317	264024			0.38361
CHPHW	Strict-Norm-Meta	Freshwater_lake_Cyanobacteria	Lake Michigan sorted cyanobacteria MI23.SRF.RED.D7	Microbial enrichment	Nextera XT	12	Strict	Read normalization	Metagenome	67639507	32251447	4850400	96800	910	302	179506			0.417598
CHPHW	Strict-None-SingleCell	Freshwater_lake_Cyanobacteria	Lake Michigan sorted cyanobacteria MI23.SRF.RED.D7	Microbial enrichment	Nextera XT	12	Strict	None	Single-cell	69476567	36008355	7648099	91242	1086	307	129051			0.375645
CHPHW	Strict-Dedup-SingleCell	Freshwater_lake_Cyanobacteria	Lake Michigan sorted cyanobacteria MI23.SRF.RED.D7	Microbial enrichment	Nextera XT	12	Strict	Read deduplication	Single-cell	64085024	36198177	9402406	75765	1370	320	102273			0.345343
CHPHW	Strict-Norm-SingleCell	Freshwater_lake_Cyanobacteria	Lake Michigan sorted cyanobacteria MI23.SRF.RED.D7	Microbial enrichment	Nextera XT	12	Strict	Read normalization	Single-cell	68789279	36028492	7618439	89172	1113	309	124339			0.369432
CHPHW	Relaxed-None-Meta	Freshwater_lake_Cyanobacteria	Lake Michigan sorted cyanobacteria MI23.SRF.RED.D7	Microbial enrichment	Nextera XT	12	Relaxed	None	Metagenome	70413552	33153866	5731986	102087	890	302	258782			0.410184
CHPHW	Relaxed-Dedup-Meta	Freshwater_lake_Cyanobacteria	Lake Michigan sorted cyanobacteria MI23.SRF.RED.D7	Microbial enrichment	Nextera XT	12	Relaxed	Read deduplication	Metagenome	60574221	31331857	6377220	77827	1067	322	263939			0.387211
CHPHW	Relaxed-Norm-Meta	Freshwater_lake_Cyanobacteria	Lake Michigan sorted cyanobacteria MI23.SRF.RED.D7	Microbial enrichment	Nextera XT	12	Relaxed	Read normalization	Metagenome	69971966	33501405	5179792	99585	920	304	188075			0.407906
CHPHW	Relaxed-None-SingleCell	Freshwater_lake_Cyanobacteria	Lake Michigan sorted cyanobacteria MI23.SRF.RED.D7	Microbial enrichment	Nextera XT	12	Relaxed	None	Single-cell	72220787	37219780	8034715	94618	1069	310	83365			0.370835
CHPHW	Relaxed-Dedup-SingleCell	Freshwater_lake_Cyanobacteria	Lake Michigan sorted cyanobacteria MI23.SRF.RED.D7	Microbial enrichment	Nextera XT	12	Relaxed	Read deduplication	Single-cell	65574409	36830897	9960715	77131	1324	327	111575			0.354859
CHPHW	Relaxed-Norm-SingleCell	Freshwater_lake_Cyanobacteria	Lake Michigan sorted cyanobacteria MI23.SRF.RED.D7	Microbial enrichment	Nextera XT	12	Relaxed	Read normalization	Single-cell	71070977	37249541	7859194	91246	1111	313	109285			0.377534
CHTTN	Strict-None-Meta	Soil_viruses_Abisko	P.10.14	Virus fraction	Nextera XT	18	Strict	None	Metagenome	2778131	330957	40851	7449	320	281	16831			0.291667
CHTTN	Strict-Dedup-Meta	Soil_viruses_Abisko	P.10.14	Virus fraction	Nextera XT	18	Strict	Read deduplication	Metagenome	2700326	328806	40255	7220	322	281	17357			0.304348
CHTTN	Strict-Norm-Meta	Soil_viruses_Abisko	P.10.14	Virus fraction	Nextera XT	18	Strict	Read normalization	Metagenome	2098011	295504	82800	5225	363	282	22188			0.293578
CHTTN	Strict-None-SingleCell	Soil_viruses_Abisko	P.10.14	Virus fraction	Nextera XT	18	Strict	None	Single-cell	2886565	398292	59216	7516	325	282	17196			0.285714
CHTTN	Strict-Dedup-SingleCell	Soil_viruses_Abisko	P.10.14	Virus fraction	Nextera XT	18	Strict	Read deduplication	Single-cell	2746180	399962	38950	7168	330	281	13283			0.288
CHTTN	Strict-Norm-SingleCell	Soil_viruses_Abisko	P.10.14	Virus fraction	Nextera XT	18	Strict	Read normalization	Single-cell	1987992	350520	94019	4717	372	283	24674			0.282051
CHTTN	Relaxed-None-Meta	Soil_viruses_Abisko	P.10.14	Virus fraction	Nextera XT	18	Relaxed	None	Metagenome	2979048	362361	63477	7534	358	283	14115			0.365079
CHTTN	Relaxed-Dedup-Meta	Soil_viruses_Abisko	P.10.14	Virus fraction	Nextera XT	18	Relaxed	Read deduplication	Metagenome	2886594	360811	66612	7204	361	283	16529			0.322835
CHTTN	Relaxed-Norm-Meta	Soil_viruses_Abisko	P.10.14	Virus fraction	Nextera XT	18	Relaxed	Read normalization	Metagenome	2504973	318339	54047	6228	368	283	16294			0.300885
CHTTN	Relaxed-None-SingleCell	Soil_viruses_Abisko	P.10.14	Virus fraction	Nextera XT	18	Relaxed	None	Single-cell	3125728	448836	76158	7622	368	284	17101			0.309353
CHTTN	Relaxed-Dedup-SingleCell	Soil_viruses_Abisko	P.10.14	Virus fraction	Nextera XT	18	Relaxed	Read deduplication	Single-cell	3046498	448757	82727	7496	368	283	21638			0.311594
CHTTN	Relaxed-Norm-SingleCell	Soil_viruses_Abisko	P.10.14	Virus fraction	Nextera XT	18	Relaxed	Read normalization	Single-cell	2445662	395175	88948	5834	373	284	25818			0.284553
CHTTO	Strict-None-Meta	Soil_viruses_Abisko	P.30.34	Virus fraction	Nextera XT	18	Strict	None	Metagenome	2723749	338534	23705	7048	338	281	23705			0.564706
CHTTO	Strict-Dedup-Meta	Soil_viruses_Abisko	P.30.34	Virus fraction	Nextera XT	18	Strict	Read deduplication	Metagenome	2667212	327550	27652	6871	339	281	27652			0.544444
CHTTO	Strict-Norm-Meta	Soil_viruses_Abisko	P.30.34	Virus fraction	Nextera XT	18	Strict	Read normalization	Metagenome	2006590	286188	37056	4789	387	283	26907			0.588235
CHTTO	Strict-None-SingleCell	Soil_viruses_Abisko	P.30.34	Virus fraction	Nextera XT	18	Strict	None	Single-cell	2742712	381022	33977	6913	346	281	33977			0.484211
CHTTO	Strict-Dedup-SingleCell	Soil_viruses_Abisko	P.30.34	Virus fraction	Nextera XT	18	Strict	Read deduplication	Single-cell	2691965	374882	43859	6895	346	281	43859			0.525253
CHTTO	Strict-Norm-SingleCell	Soil_viruses_Abisko	P.30.34	Virus fraction	Nextera XT	18	Strict	Read normalization	Single-cell	1937539	319611	25428	4436	399	285	25428			0.480519
CHTTO	Relaxed-None-Meta	Soil_viruses_Abisko	P.30.34	Virus fraction	Nextera XT	18	Relaxed	None	Metagenome	2952677	427175	34724	6930	393	285	24405			0.550459
CHTTO	Relaxed-Dedup-Meta	Soil_viruses_Abisko	P.30.34	Virus fraction	Nextera XT	18	Relaxed	Read deduplication	Metagenome	2860672	431789	33945	6626	396	285	19162			0.508197
CHTTO	Relaxed-Norm-Meta	Soil_viruses_Abisko	P.30.34	Virus fraction	Nextera XT	18	Relaxed	Read normalization	Metagenome	2516143	367431	35585	5841	400	285	35585			0.574468
CHTTO	Relaxed-None-SingleCell	Soil_viruses_Abisko	P.30.34	Virus fraction	Nextera XT	18	Relaxed	None	Single-cell	3048960	504289	50768	6930	403	285	17412			0.530769
CHTTO	Relaxed-Dedup-SingleCell	Soil_viruses_Abisko	P.30.34	Virus fraction	Nextera XT	18	Relaxed	Read deduplication	Single-cell	2979082	512230	46114	6820	404	285	17131			0.518797
CHTTO	Relaxed-Norm-SingleCell	Soil_viruses_Abisko	P.30.34	Virus fraction	Nextera XT	18	Relaxed	Read normalization	Single-cell	2435959	414469	36799	5439	413	286	36799			0.509804
CHTTP	Strict-None-Meta	Soil_viruses_Abisko	B.1.5	Virus fraction	Nextera XT	18	Strict	None	Metagenome	4776140	812715	122040	11640	361	282	58031			0.415686
CHTTP	Strict-Dedup-Meta	Soil_viruses_Abisko	B.1.5	Virus fraction	Nextera XT	18	Strict	Read deduplication	Metagenome	4371369	786285	98022	10374	374	282	24770			0.425197
CHTTP	Strict-Norm-Meta	Soil_viruses_Abisko	B.1.5	Virus fraction	Nextera XT	18	Strict	Read normalization	Metagenome	4139328	760966	48922	9639	389	282	27560			0.463415
CHTTP	Strict-None-SingleCell	Soil_viruses_Abisko	B.1.5	Virus fraction	Nextera XT	18	Strict	None	Single-cell	4636211	887538	140221	10871	374	282	44596			0.42807
CHTTP	Strict-Dedup-SingleCell	Soil_viruses_Abisko	B.1.5	Virus fraction	Nextera XT	18	Strict	Read deduplication	Single-cell	4529732	883122	156551	10981	373	281	44596			0.407801
CHTTP	Strict-Norm-SingleCell	Soil_viruses_Abisko	B.1.5	Virus fraction	Nextera XT	18	Strict	Read normalization	Single-cell	3951570	834765	121787	8782	401	283	46891			0.450909
CHTTP	Relaxed-None-Meta	Soil_viruses_Abisko	B.1.5	Virus fraction	Nextera XT	18	Relaxed	None	Metagenome	5569131	969579	132612	12907	391	284	48259			0.445183
CHTTP	Relaxed-Dedup-Meta	Soil_viruses_Abisko	B.1.5	Virus fraction	Nextera XT	18	Relaxed	Read deduplication	Metagenome	5259952	959258	115917	11922	398	285	57389			0.46732
CHTTP	Relaxed-Norm-Meta	Soil_viruses_Abisko	B.1.5	Virus fraction	Nextera XT	18	Relaxed	Read normalization	Metagenome	4892667	870817	109094	11297	394	283	27560			0.429091
CHTTP	Relaxed-None-SingleCell	Soil_viruses_Abisko	B.1.5	Virus fraction	Nextera XT	18	Relaxed	None	Single-cell	5541913	1110829	167591	12315	404	284	57519			0.434286
CHTTP	Relaxed-Dedup-SingleCell	Soil_viruses_Abisko	B.1.5	Virus fraction	Nextera XT	18	Relaxed	Read deduplication	Single-cell	5408963	1104318	189882	12006	408	284	59820			0.433526
CHTTP	Relaxed-Norm-SingleCell	Soil_viruses_Abisko	B.1.5	Virus fraction	Nextera XT	18	Relaxed	Read normalization	Single-cell	4709224	966825	152927	10424	404	284	58287			0.435484
CHTTS	Strict-None-Meta	Soil_viruses_Abisko	B.10.14	Virus fraction	Nextera XT	18	Strict	None	Metagenome	239885253	77988896	11508768	438730	569	289	341305			0.441266
CHTTS	Strict-Dedup-Meta	Soil_viruses_Abisko	B.10.14	Virus fraction	Nextera XT	18	Strict	Read deduplication	Metagenome	224559920	83616028	12592785	372771	658	303	319054			0.439161
CHTTS	Strict-Norm-Meta	Soil_viruses_Abisko	B.10.14	Virus fraction	Nextera XT	18	Strict	Read normalization	Metagenome	235605292	77457471	10702847	426029	577	290	341305			0.445045
CHTTS	Strict-None-SingleCell	Soil_viruses_Abisko	B.10.14	Virus fraction	Nextera XT	18	Strict	None	Single-cell	237548067	92854364	19770610	388030	674	295	785799			0.413941
CHTTS	Strict-Dedup-SingleCell	Soil_viruses_Abisko	B.10.14	Virus fraction	Nextera XT	18	Strict	Read deduplication	Single-cell	235548585	96638883	21370417	365586	726	308	550750			0.411794
CHTTS	Strict-Norm-SingleCell	Soil_viruses_Abisko	B.10.14	Virus fraction	Nextera XT	18	Strict	Read normalization	Single-cell	231527198	92244574	19134134	368710	692	298	504602			0.407155
CHTTS	Relaxed-None-Meta	Soil_viruses_Abisko	B.10.14	Virus fraction	Nextera XT	18	Relaxed	None	Metagenome	277155578	92976734	14315024	495659	588	291	458475			0.456126
CHTTS	Relaxed-Dedup-Meta	Soil_viruses_Abisko	B.10.14	Virus fraction	Nextera XT	18	Relaxed	Read deduplication	Metagenome	262123130	99360524	15334925	427366	676	306	531984			0.450704
CHTTS	Relaxed-Norm-Meta	Soil_viruses_Abisko	B.10.14	Virus fraction	Nextera XT	18	Relaxed	Read normalization	Metagenome	267731076	91731369	13422262	471590	604	292	365819			0.443148
CHTTS	Relaxed-None-SingleCell	Soil_viruses_Abisko	B.10.14	Virus fraction	Nextera XT	18	Relaxed	None	Single-cell	275485656	108509613	22762518	444704	686	299	550956			0.412786
CHTTS	Relaxed-Dedup-SingleCell	Soil_viruses_Abisko	B.10.14	Virus fraction	Nextera XT	18	Relaxed	Read deduplication	Single-cell	277398184	112631889	25080053	430252	722	310	785817			0.425941
CHTTS	Relaxed-Norm-SingleCell	Soil_viruses_Abisko	B.10.14	Virus fraction	Nextera XT	18	Relaxed	Read normalization	Single-cell	262417133	106826254	22731124	408204	718	302	660315			0.415513
CHTTT	Strict-None-Meta	Soil_viruses_Abisko	B.20.24	Virus fraction	Nextera XT	12	Strict	None	Metagenome	177867506	66433764	14447188	301892	635	291	333188			0.405686
CHTTT	Strict-Dedup-Meta	Soil_viruses_Abisko	B.20.24	Virus fraction	Nextera XT	12	Strict	Read deduplication	Metagenome	167729939	67474786	15083395	264838	702	304	381538			0.415227
CHTTT	Strict-Norm-Meta	Soil_viruses_Abisko	B.20.24	Virus fraction	Nextera XT	12	Strict	Read normalization	Metagenome	177833909	66454477	13562733	300910	639	291	322679			0.41767
CHTTT	Strict-None-SingleCell	Soil_viruses_Abisko	B.20.24	Virus fraction	Nextera XT	12	Strict	None	Single-cell	175656787	72256191	17427075	275526	716	297	449366			0.403527
CHTTT	Strict-Dedup-SingleCell	Soil_viruses_Abisko	B.20.24	Virus fraction	Nextera XT	12	Strict	Read deduplication	Single-cell	179178354	75116701	18645424	276027	738	303	467301			0.401015
CHTTT	Strict-Norm-SingleCell	Soil_viruses_Abisko	B.20.24	Virus fraction	Nextera XT	12	Strict	Read normalization	Single-cell	175040710	72338054	17335765	273132	720	297	381528			0.401093
CHTTT	Relaxed-None-Meta	Soil_viruses_Abisko	B.20.24	Virus fraction	Nextera XT	12	Relaxed	None	Metagenome	189241708	71115215	15339650	318813	640	292	381538			0.409811
CHTTT	Relaxed-Dedup-Meta	Soil_viruses_Abisko	B.20.24	Virus fraction	Nextera XT	12	Relaxed	Read deduplication	Metagenome	176325783	72667615	16223598	271106	726	311	807560			0.405861
CHTTT	Relaxed-Norm-Meta	Soil_viruses_Abisko	B.20.24	Virus fraction	Nextera XT	12	Relaxed	Read normalization	Metagenome	188172573	71107737	14647485	315403	648	292	557149			0.410068
CHTTT	Relaxed-None-SingleCell	Soil_viruses_Abisko	B.20.24	Virus fraction	Nextera XT	12	Relaxed	None	Single-cell	186765299	77363610	18520507	290427	723	299	699329			0.400089
CHTTT	Relaxed-Dedup-SingleCell	Soil_viruses_Abisko	B.20.24	Virus fraction	Nextera XT	12	Relaxed	Read deduplication	Single-cell	188579711	79631987	19904598	283493	747	311	906464			0.398942
CHTTT	Relaxed-Norm-SingleCell	Soil_viruses_Abisko	B.20.24	Virus fraction	Nextera XT	12	Relaxed	Read normalization	Single-cell	184312355	77034439	18506936	284764	732	299	833526			0.400357
CHTTU	Strict-None-Meta	Soil_viruses_Abisko	B.30.34	Virus fraction	Nextera XT	18	Strict	None	Metagenome	109229403	35738355	6124987	200729	569	289	96483			0.397638
CHTTU	Strict-Dedup-Meta	Soil_viruses_Abisko	B.30.34	Virus fraction	Nextera XT	18	Strict	Read deduplication	Metagenome	101092539	38138620	6464439	167666	665	303	88549			0.383464
CHTTU	Strict-Norm-Meta	Soil_viruses_Abisko	B.30.34	Virus fraction	Nextera XT	18	Strict	Read normalization	Metagenome	107087311	35400191	5504710	193822	581	290	78982			0.394463
CHTTU	Strict-None-SingleCell	Soil_viruses_Abisko	B.30.34	Virus fraction	Nextera XT	18	Strict	None	Single-cell	106661435	42072429	9076218	175263	677	295	89081			0.35358
CHTTU	Strict-Dedup-SingleCell	Soil_viruses_Abisko	B.30.34	Virus fraction	Nextera XT	18	Strict	Read deduplication	Single-cell	104806099	43917361	10376635	163289	740	306	89081			0.353216
CHTTU	Strict-Norm-SingleCell	Soil_viruses_Abisko	B.30.34	Virus fraction	Nextera XT	18	Strict	Read normalization	Single-cell	103310061	41599560	8886286	164159	700	300	89329			0.357936
CHTTU	Relaxed-None-Meta	Soil_viruses_Abisko	B.30.34	Virus fraction	Nextera XT	18	Relaxed	None	Metagenome	116369507	38555157	6917039	211817	575	290	96484			0.384888
CHTTU	Relaxed-Dedup-Meta	Soil_viruses_Abisko	B.30.34	Virus fraction	Nextera XT	18	Relaxed	Read deduplication	Metagenome	108097624	41277846	7181966	177429	673	305	110296			0.395499
CHTTU	Relaxed-Norm-Meta	Soil_viruses_Abisko	B.30.34	Virus fraction	Nextera XT	18	Relaxed	Read normalization	Metagenome	113282314	37917407	6317558	203305	588	291	94072			0.402039
CHTTU	Relaxed-None-SingleCell	Soil_viruses_Abisko	B.30.34	Virus fraction	Nextera XT	18	Relaxed	None	Single-cell	113740895	45163539	9995332	185091	684	298	141637			0.364594
CHTTU	Relaxed-Dedup-SingleCell	Soil_viruses_Abisko	B.30.34	Virus fraction	Nextera XT	18	Relaxed	Read deduplication	Single-cell	112271814	46977786	11193049	173333	739	309	112169			0.346484
CHTTU	Relaxed-Norm-SingleCell	Soil_viruses_Abisko	B.30.34	Virus fraction	Nextera XT	18	Relaxed	Read normalization	Single-cell	108914579	44555577	9889456	170208	715	302	110296			0.357105
CHTTW	Strict-None-Meta	Soil_viruses_Abisko	F.1.5	Virus fraction	Nextera XT	18	Strict	None	Metagenome	28619830	7560852	1023624	57571	479	286	77406			0.463703
CHTTW	Strict-Dedup-Meta	Soil_viruses_Abisko	F.1.5	Virus fraction	Nextera XT	18	Strict	Read deduplication	Metagenome	27241550	7626578	1126689	52730	502	289	77401			0.45706
CHTTW	Strict-Norm-Meta	Soil_viruses_Abisko	F.1.5	Virus fraction	Nextera XT	18	Strict	Read normalization	Metagenome	28525598	7443519	868462	57043	485	287	59393			0.473855
CHTTW	Strict-None-SingleCell	Soil_viruses_Abisko	F.1.5	Virus fraction	Nextera XT	18	Strict	None	Single-cell	28035654	8590579	1544765	52312	523	288	84569			0.445671
CHTTW	Strict-Dedup-SingleCell	Soil_viruses_Abisko	F.1.5	Virus fraction	Nextera XT	18	Strict	Read deduplication	Single-cell	27977822	8771313	1561789	52193	535	289	84530			0.446316
CHTTW	Strict-Norm-SingleCell	Soil_viruses_Abisko	F.1.5	Virus fraction	Nextera XT	18	Strict	Read normalization	Single-cell	27329199	8401894	1508658	50368	534	289	99965			0.44804
CHTTW	Relaxed-None-Meta	Soil_viruses_Abisko	F.1.5	Virus fraction	Nextera XT	18	Relaxed	None	Metagenome	30708649	7843806	1004719	61886	478	287	59393			0.469597
CHTTW	Relaxed-Dedup-Meta	Soil_viruses_Abisko	F.1.5	Virus fraction	Nextera XT	18	Relaxed	Read deduplication	Metagenome	28659648	7938542	1025368	54489	509	293	70074			0.464254
CHTTW	Relaxed-Norm-Meta	Soil_viruses_Abisko	F.1.5	Virus fraction	Nextera XT	18	Relaxed	Read normalization	Metagenome	30286853	7780858	912536	60437	486	288	58302			0.472716
CHTTW	Relaxed-None-SingleCell	Soil_viruses_Abisko	F.1.5	Virus fraction	Nextera XT	18	Relaxed	None	Single-cell	30062740	9045767	1541525	56012	524	289	63646			0.450795
CHTTW	Relaxed-Dedup-SingleCell	Soil_viruses_Abisko	F.1.5	Virus fraction	Nextera XT	18	Relaxed	Read deduplication	Single-cell	29777092	9146645	1637079	54442	539	292	62964			0.454137
CHTTW	Relaxed-Norm-SingleCell	Soil_viruses_Abisko	F.1.5	Virus fraction	Nextera XT	18	Relaxed	Read normalization	Single-cell	29072099	8831102	1444931	53715	532	290	59417			0.45452
CHTTX	Strict-None-Meta	Soil_viruses_Abisko	B.10.14.2	Virus fraction	Nextera XT	18	Strict	None	Metagenome	125464413	34191171	6922018	245381	491	287	285811			0.408575
CHTTX	Strict-Dedup-Meta	Soil_viruses_Abisko	B.10.14.2	Virus fraction	Nextera XT	18	Strict	Read deduplication	Metagenome	117673445	35127607	7527588	214661	535	297	285811			0.406247
CHTTX	Strict-Norm-Meta	Soil_viruses_Abisko	B.10.14.2	Virus fraction	Nextera XT	18	Strict	Read normalization	Metagenome	124279047	34090835	6807456	242503	493	287	213847			0.414658
CHTTX	Strict-None-SingleCell	Soil_viruses_Abisko	B.10.14.2	Virus fraction	Nextera XT	18	Strict	None	Single-cell	124919440	37363726	9944026	232906	520	288	285811			0.377752
CHTTX	Strict-Dedup-SingleCell	Soil_viruses_Abisko	B.10.14.2	Virus fraction	Nextera XT	18	Strict	Read deduplication	Single-cell	127130611	38728175	10573748	235334	536	293	231326			0.381098
CHTTX	Strict-Norm-SingleCell	Soil_viruses_Abisko	B.10.14.2	Virus fraction	Nextera XT	18	Strict	Read normalization	Single-cell	123164953	37104082	9878728	228050	523	289	285811			0.380728
CHTTX	Relaxed-None-Meta	Soil_viruses_Abisko	B.10.14.2	Virus fraction	Nextera XT	18	Relaxed	None	Metagenome	146334223	41134311	8224687	280833	504	289	211512			0.421198
CHTTX	Relaxed-Dedup-Meta	Soil_viruses_Abisko	B.10.14.2	Virus fraction	Nextera XT	18	Relaxed	Read deduplication	Metagenome	139026806	42745713	8975331	247135	556	303	201926			0.415831
CHTTX	Relaxed-Norm-Meta	Soil_viruses_Abisko	B.10.14.2	Virus fraction	Nextera XT	18	Relaxed	Read normalization	Metagenome	141189543	40671993	7827687	268594	514	289	222430			0.421299
CHTTX	Relaxed-None-SingleCell	Soil_viruses_Abisko	B.10.14.2	Virus fraction	Nextera XT	18	Relaxed	None	Single-cell	146816442	44990876	11125624	268212	536	290	285811			0.397728
CHTTX	Relaxed-Dedup-SingleCell	Soil_viruses_Abisko	B.10.14.2	Virus fraction	Nextera XT	18	Relaxed	Read deduplication	Single-cell	150417733	46472165	12026538	267143	555	301	219805			0.395658
CHTTX	Relaxed-Norm-SingleCell	Soil_viruses_Abisko	B.10.14.2	Virus fraction	Nextera XT	18	Relaxed	Read normalization	Single-cell	140434938	44287264	11103619	253561	547	290	222466			0.397089
CHTTY	Strict-None-Meta	Soil_viruses_Abisko	F.1.5.2	Virus fraction	Nextera XT	12	Strict	None	Metagenome	220876702	87688291	26039148	358036	673	292	679184			0.344067
CHTTY	Strict-Dedup-Meta	Soil_viruses_Abisko	F.1.5.2	Virus fraction	Nextera XT	12	Strict	Read deduplication	Metagenome	209172571	89916515	27055340	312632	762	309	680487			0.338242
CHTTY	Strict-Norm-Meta	Soil_viruses_Abisko	F.1.5.2	Virus fraction	Nextera XT	12	Strict	Read normalization	Metagenome	220446932	87571213	24890805	356884	676	293	680604			0.340378
CHTTY	Strict-None-SingleCell	Soil_viruses_Abisko	F.1.5.2	Virus fraction	Nextera XT	12	Strict	None	Single-cell	219419112	94700269	30892726	331506	759	297	761198			0.330654
CHTTY	Strict-Dedup-SingleCell	Soil_viruses_Abisko	F.1.5.2	Virus fraction	Nextera XT	12	Strict	Read deduplication	Single-cell	220932721	98439830	32680107	319880	803	310	761198			0.336085
CHTTY	Strict-Norm-SingleCell	Soil_viruses_Abisko	F.1.5.2	Virus fraction	Nextera XT	12	Strict	Read normalization	Single-cell	218260038	94623268	31186393	328200	763	298	821327			0.325593
CHTTY	Relaxed-None-Meta	Soil_viruses_Abisko	F.1.5.2	Virus fraction	Nextera XT	12	Relaxed	None	Metagenome	250708114	98527787	28579301	406366	666	296	650143			0.354498
CHTTY	Relaxed-Dedup-Meta	Soil_viruses_Abisko	F.1.5.2	Virus fraction	Nextera XT	12	Relaxed	Read deduplication	Metagenome	239487564	102409960	30073460	356392	759	313	471129			0.35252
CHTTY	Relaxed-Norm-Meta	Soil_viruses_Abisko	F.1.5.2	Virus fraction	Nextera XT	12	Relaxed	Read normalization	Metagenome	245724150	98353569	27632191	393932	685	296	680826			0.360256
CHTTY	Relaxed-None-SingleCell	Soil_viruses_Abisko	F.1.5.2	Virus fraction	Nextera XT	12	Relaxed	None	Single-cell	249535616	107065118	34598808	376800	754	301	761198			0.324946
CHTTY	Relaxed-Dedup-SingleCell	Soil_viruses_Abisko	F.1.5.2	Virus fraction	Nextera XT	12	Relaxed	Read deduplication	Single-cell	253420346	111117658	36710115	367709	785	315	689217			0.345234
CHTTY	Relaxed-Norm-SingleCell	Soil_viruses_Abisko	F.1.5.2	Virus fraction	Nextera XT	12	Relaxed	Read normalization	Single-cell	243309071	106545242	34511759	362067	777	301	821108			0.330375
CHTTZ	Strict-None-Meta	Soil_viruses_Abisko	F.1.5.2B	Virus fraction	Nextera XT	12	Strict	None	Metagenome	16272008	8883529	1238992	22052	1258	291	59291			0.438172
CHTTZ	Strict-Dedup-Meta	Soil_viruses_Abisko	F.1.5.2B	Virus fraction	Nextera XT	12	Strict	Read deduplication	Metagenome	15885016	8508823	1009130	21826	1186	294	59567			0.46128
CHTTZ	Strict-Norm-Meta	Soil_viruses_Abisko	F.1.5.2B	Virus fraction	Nextera XT	12	Strict	Read normalization	Metagenome	16048636	8533588	992331	22124	1161	293	59366			0.4564
CHTTZ	Strict-None-SingleCell	Soil_viruses_Abisko	F.1.5.2B	Virus fraction	Nextera XT	12	Strict	None	Single-cell	16088475	9106210	1531428	20724	1398	293	59530			0.427565
CHTTZ	Strict-Dedup-SingleCell	Soil_viruses_Abisko	F.1.5.2B	Virus fraction	Nextera XT	12	Strict	Read deduplication	Single-cell	15940427	9133605	1610085	20271	1451	295	59259			0.426614
CHTTZ	Strict-Norm-SingleCell	Soil_viruses_Abisko	F.1.5.2B	Virus fraction	Nextera XT	12	Strict	Read normalization	Single-cell	15779019	8736580	1328900	20622	1296	296	59385			0.443374
CHTTZ	Relaxed-None-Meta	Soil_viruses_Abisko	F.1.5.2B	Virus fraction	Nextera XT	12	Relaxed	None	Metagenome	17308728	9283005	1340101	23747	1220	292	59331			0.41494
CHTTZ	Relaxed-Dedup-Meta	Soil_viruses_Abisko	F.1.5.2B	Virus fraction	Nextera XT	12	Relaxed	Read deduplication	Metagenome	16645803	9190841	1527639	21733	1328	304	59331			0.417504
CHTTZ	Relaxed-Norm-Meta	Soil_viruses_Abisko	F.1.5.2B	Virus fraction	Nextera XT	12	Relaxed	Read normalization	Metagenome	16789065	8892819	1119264	23162	1163	293	59255			0.438445
CHTTZ	Relaxed-None-SingleCell	Soil_viruses_Abisko	F.1.5.2B	Virus fraction	Nextera XT	12	Relaxed	None	Single-cell	17145465	9606961	1926558	22225	1410	294	59619			0.395619
CHTTZ	Relaxed-Dedup-SingleCell	Soil_viruses_Abisko	F.1.5.2B	Virus fraction	Nextera XT	12	Relaxed	Read deduplication	Single-cell	16954352	9616774	1984397	21557	1494	299	58961			0.392064
CHTTZ	Relaxed-Norm-SingleCell	Soil_viruses_Abisko	F.1.5.2B	Virus fraction	Nextera XT	12	Relaxed	Read normalization	Single-cell	16431151	9126125	1510807	21401	1328	296	59398			0.42375
CHTUA	Strict-None-Meta	Soil_viruses_Abisko	B.1.5.3	Virus fraction	Nextera XT	12	Strict	None	Metagenome	12299714	7790469	1758195	14437	2483	290	74352			0.340591
CHTUA	Strict-Dedup-Meta	Soil_viruses_Abisko	B.1.5.3	Virus fraction	Nextera XT	12	Strict	Read deduplication	Metagenome	12147095	7753096	1700315	14055	2531	291	69240			0.342899
CHTUA	Strict-Norm-Meta	Soil_viruses_Abisko	B.1.5.3	Virus fraction	Nextera XT	12	Strict	Read normalization	Metagenome	11522724	7490023	1233731	12736	2272	304	74352			0.379437
CHTUA	Strict-None-SingleCell	Soil_viruses_Abisko	B.1.5.3	Virus fraction	Nextera XT	12	Strict	None	Single-cell	12254480	7918003	2043630	13745	2858	291	74352			0.321304
CHTUA	Strict-Dedup-SingleCell	Soil_viruses_Abisko	B.1.5.3	Virus fraction	Nextera XT	12	Strict	Read deduplication	Single-cell	12183076	7921732	2193328	13866	2964	290	74352			0.318298
CHTUA	Strict-Norm-SingleCell	Soil_viruses_Abisko	B.1.5.3	Virus fraction	Nextera XT	12	Strict	Read normalization	Single-cell	11362168	7635000	1462097	11746	2650	310	74352			0.363661
CHTUA	Relaxed-None-Meta	Soil_viruses_Abisko	B.1.5.3	Virus fraction	Nextera XT	12	Relaxed	None	Metagenome	12373952	7925767	1918777	14030	2596	293	74352			0.329124
CHTUA	Relaxed-Dedup-Meta	Soil_viruses_Abisko	B.1.5.3	Virus fraction	Nextera XT	12	Relaxed	Read deduplication	Metagenome	12152359	7896118	2099115	13300	2967	298	63211			0.312221
CHTUA	Relaxed-Norm-Meta	Soil_viruses_Abisko	B.1.5.3	Virus fraction	Nextera XT	12	Relaxed	Read normalization	Metagenome	11826731	7687250	1469742	13046	2379	304	74352			0.360156
CHTUA	Relaxed-None-SingleCell	Soil_viruses_Abisko	B.1.5.3	Virus fraction	Nextera XT	12	Relaxed	None	Single-cell	12495528	8092058	2407916	13748	3155	294	74351			0.29703
CHTUA	Relaxed-Dedup-SingleCell	Soil_viruses_Abisko	B.1.5.3	Virus fraction	Nextera XT	12	Relaxed	Read deduplication	Single-cell	12409078	8099442	2550240	13737	3334	293	68652			0.292363
CHTUA	Relaxed-Norm-SingleCell	Soil_viruses_Abisko	B.1.5.3	Virus fraction	Nextera XT	12	Relaxed	Read normalization	Single-cell	11650581	7817744	1834974	12046	2840	308	74352			0.341477
COHNO	Strict-None-Meta	Soil_viruses_Abisko	P.1-5	Virus fraction	Accel-NGS 1S Plus	12	Strict	None	Metagenome	925399494	279969843	2466045	1633823	584	310	32006			0.592837
COHNO	Strict-Dedup-Meta	Soil_viruses_Abisko	P.1-5	Virus fraction	Accel-NGS 1S Plus	12	Strict	Read deduplication	Metagenome	979186057	398220326	67179430	1475979	739	318	148500			0.498247
COHNO	Strict-Norm-Meta	Soil_viruses_Abisko	P.1-5	Virus fraction	Accel-NGS 1S Plus	12	Strict	Read normalization	Metagenome	886896864	252779986	570873	1605981	570	308	33745			0.61707
COHNO	Strict-None-SingleCell	Soil_viruses_Abisko	P.1-5	Virus fraction	Accel-NGS 1S Plus	12	Strict	None	Single-cell	954506728	378761320	66597930	1471259	711	315	160621			0.495685
COHNO	Strict-Dedup-SingleCell	Soil_viruses_Abisko	P.1-5	Virus fraction	Accel-NGS 1S Plus	12	Strict	Read deduplication	Single-cell	1081623859	415441996	88017341	1684101	684	316	428966			0.48011
COHNO	Strict-Norm-SingleCell	Soil_viruses_Abisko	P.1-5	Virus fraction	Accel-NGS 1S Plus	12	Strict	Read normalization	Single-cell	942546775	377118555	67212959	1445000	718	316	160621			0.481879
COHNO	Relaxed-None-Meta	Soil_viruses_Abisko	P.1-5	Virus fraction	Accel-NGS 1S Plus	12	Relaxed	None	Metagenome	1121372060	376048324	7774306	1916128	618	310	27211			0.574669
COHNO	Relaxed-Dedup-Meta	Soil_viruses_Abisko	P.1-5	Virus fraction	Accel-NGS 1S Plus	12	Relaxed	Read deduplication	Metagenome	1247476743	499299675	101683224	1897338	725	317	239229			0.489253
COHNO	Relaxed-Norm-Meta	Soil_viruses_Abisko	P.1-5	Virus fraction	Accel-NGS 1S Plus	12	Relaxed	Read normalization	Metagenome	1074421140	372008720	7682866	1803819	638	312	35159			0.566506
COHNO	Relaxed-None-SingleCell	Soil_viruses_Abisko	P.1-5	Virus fraction	Accel-NGS 1S Plus	12	Relaxed	None	Single-cell	1216951734	480808769	96949440	1877828	708	315	182080			0.485558
COHNO	Relaxed-Dedup-SingleCell	Soil_viruses_Abisko	P.1-5	Virus fraction	Accel-NGS 1S Plus	12	Relaxed	Read deduplication	Single-cell	1379451340	513196399	112302127	2194654	658	314	295776			0.484096
COHNO	Relaxed-Norm-SingleCell	Soil_viruses_Abisko	P.1-5	Virus fraction	Accel-NGS 1S Plus	12	Relaxed	Read normalization	Single-cell	1152364946	475788720	98333604	1725066	748	318	182080			0.23495
COHNP	Strict-None-Meta	Soil_viruses_Abisko	P.20-24	Virus fraction	Accel-NGS 1S Plus	12	Strict	None	Metagenome	820387496	271508014	2945800	1406424	609	311	59232			0.578219
COHNP	Strict-Dedup-Meta	Soil_viruses_Abisko	P.20-24	Virus fraction	Accel-NGS 1S Plus	12	Strict	Read deduplication	Metagenome	875676991	362327443	76342506	1305251	746	318	128997			0.473521
COHNP	Strict-Norm-Meta	Soil_viruses_Abisko	P.20-24	Virus fraction	Accel-NGS 1S Plus	12	Strict	Read normalization	Metagenome	784527841	235723588	233048	1403971	583	309	48460			0.624814
COHNP	Strict-None-SingleCell	Soil_viruses_Abisko	P.20-24	Virus fraction	Accel-NGS 1S Plus	12	Strict	None	Single-cell	835204817	346861768	72725892	1259870	737	315	133339			0.474315
COHNP	Strict-Dedup-SingleCell	Soil_viruses_Abisko	P.20-24	Virus fraction	Accel-NGS 1S Plus	12	Strict	Read deduplication	Single-cell	964443653	373229542	97162086	1500914	677	315	329062			0.453642
COHNP	Strict-Norm-SingleCell	Soil_viruses_Abisko	P.20-24	Virus fraction	Accel-NGS 1S Plus	12	Strict	Read normalization	Single-cell	828380893	347862111	76509686	1240265	747	315	133339			0.468265
COHNP	Relaxed-None-Meta	Soil_viruses_Abisko	P.20-24	Virus fraction	Accel-NGS 1S Plus	12	Relaxed	None	Metagenome	941010885	326337811	4461091	1603293	627	309	50163			0.571784
COHNP	Relaxed-Dedup-Meta	Soil_viruses_Abisko	P.20-24	Virus fraction	Accel-NGS 1S Plus	12	Relaxed	Read deduplication	Metagenome	1054875328	433228607	111599867	1578784	736	317	343049			0.453326
COHNP	Relaxed-Norm-Meta	Soil_viruses_Abisko	P.20-24	Virus fraction	Accel-NGS 1S Plus	12	Relaxed	Read normalization	Metagenome	909686604	323646208	4390719	1528353	644	311	63225			0.573448
COHNP	Relaxed-None-SingleCell	Soil_viruses_Abisko	P.20-24	Virus fraction	Accel-NGS 1S Plus	12	Relaxed	None	Single-cell	1005384996	417466132	101285539	1514240	736	315	189029			0.459049
COHNP	Relaxed-Dedup-SingleCell	Soil_viruses_Abisko	P.20-24	Virus fraction	Accel-NGS 1S Plus	12	Relaxed	Read deduplication	Single-cell	1162529633	440877826	120357066	1833393	660	314	339137			0.456667
COHNP	Relaxed-Norm-SingleCell	Soil_viruses_Abisko	P.20-24	Virus fraction	Accel-NGS 1S Plus	12	Relaxed	Read normalization	Single-cell	964361442	414468640	102808025	1416743	773	317	189029			0.104062
COHNS	Strict-None-Meta	Soil_viruses_Abisko	B.30-34	Virus fraction	Accel-NGS 1S Plus	20	Strict	None	Metagenome	1933608	179524		4891	361	289	7829			0.5
COHNS	Strict-Dedup-Meta	Soil_viruses_Abisko	B.30-34	Virus fraction	Accel-NGS 1S Plus	20	Strict	Read deduplication	Metagenome	1810382	152957		4576	361	290	5291			0.455882
COHNS	Strict-Norm-Meta	Soil_viruses_Abisko	B.30-34	Virus fraction	Accel-NGS 1S Plus	20	Strict	Read normalization	Metagenome	1775855	154556		4511	358	289	6858			0.542373
COHNS	Strict-None-SingleCell	Soil_viruses_Abisko	B.30-34	Virus fraction	Accel-NGS 1S Plus	20	Strict	None	Single-cell	2009534	199805	11503	4988	365	291	11503			0.549296
COHNS	Strict-Dedup-SingleCell	Soil_viruses_Abisko	B.30-34	Virus fraction	Accel-NGS 1S Plus	20	Strict	Read deduplication	Single-cell	2050365	217748		5158	366	289	5590			0.494118
COHNS	Strict-Norm-SingleCell	Soil_viruses_Abisko	B.30-34	Virus fraction	Accel-NGS 1S Plus	20	Strict	Read normalization	Single-cell	1677200	202149		4128	364	290	7121			0.506329
COHNS	Relaxed-None-Meta	Soil_viruses_Abisko	B.30-34	Virus fraction	Accel-NGS 1S Plus	20	Relaxed	None	Metagenome	2251471	203053		5717	359	289	9753			0.453333
COHNS	Relaxed-Dedup-Meta	Soil_viruses_Abisko	B.30-34	Virus fraction	Accel-NGS 1S Plus	20	Relaxed	Read deduplication	Metagenome	2152335	188081		5486	359	288	6026			0.5
COHNS	Relaxed-Norm-Meta	Soil_viruses_Abisko	B.30-34	Virus fraction	Accel-NGS 1S Plus	20	Relaxed	Read normalization	Metagenome	1918105	177767		4861	357	289	8026			0.458333
COHNS	Relaxed-None-SingleCell	Soil_viruses_Abisko	B.30-34	Virus fraction	Accel-NGS 1S Plus	20	Relaxed	None	Single-cell	2472161	222194	10435	6181	363	290	10435			0.426829
COHNS	Relaxed-Dedup-SingleCell	Soil_viruses_Abisko	B.30-34	Virus fraction	Accel-NGS 1S Plus	20	Relaxed	Read deduplication	Single-cell	2627010	235774		6724	358	288	7970			0.532609
COHNS	Relaxed-Norm-SingleCell	Soil_viruses_Abisko	B.30-34	Virus fraction	Accel-NGS 1S Plus	20	Relaxed	Read normalization	Single-cell	1878000	213003		4667	360	289	6623			0.493333
COHNT	Strict-None-Meta	Soil_viruses_Abisko	F.10-14	Virus fraction	Accel-NGS 1S Plus	18	Strict	None	Metagenome	17059118	4683811	343294	31349	546	305	51990			0.598334
COHNT	Strict-Dedup-Meta	Soil_viruses_Abisko	F.10-14	Virus fraction	Accel-NGS 1S Plus	18	Strict	Read deduplication	Metagenome	16672826	4491160	238067	30520	558	307	38138			0.616636
COHNT	Strict-Norm-Meta	Soil_viruses_Abisko	F.10-14	Virus fraction	Accel-NGS 1S Plus	18	Strict	Read normalization	Metagenome	16696045	4444792	269876	30854	542	306	30709			0.602362
COHNT	Strict-None-SingleCell	Soil_viruses_Abisko	F.10-14	Virus fraction	Accel-NGS 1S Plus	18	Strict	None	Single-cell	16412396	5253022	484143	28579	598	307	33659			0.58401
COHNT	Strict-Dedup-SingleCell	Soil_viruses_Abisko	F.10-14	Virus fraction	Accel-NGS 1S Plus	18	Strict	Read deduplication	Single-cell	18132419	5454825	425207	38261	558	288	43024			0.588943
COHNT	Strict-Norm-SingleCell	Soil_viruses_Abisko	F.10-14	Virus fraction	Accel-NGS 1S Plus	18	Strict	Read normalization	Single-cell	15741405	5138545	499478	27052	606	309	40169			0.585304
COHNT	Relaxed-None-Meta	Soil_viruses_Abisko	F.10-14	Virus fraction	Accel-NGS 1S Plus	18	Relaxed	None	Metagenome	18143633	5156301	421746	33017	554	305	48183			0.580882
COHNT	Relaxed-Dedup-Meta	Soil_viruses_Abisko	F.10-14	Virus fraction	Accel-NGS 1S Plus	18	Relaxed	Read deduplication	Metagenome	17678270	5123635	380729	31696	574	307	35437			0.605472
COHNT	Relaxed-Norm-Meta	Soil_viruses_Abisko	F.10-14	Virus fraction	Accel-NGS 1S Plus	18	Relaxed	Read normalization	Metagenome	17607303	4725490	425409	32472	539	306	35823			0.587586
COHNT	Relaxed-None-SingleCell	Soil_viruses_Abisko	F.10-14	Virus fraction	Accel-NGS 1S Plus	18	Relaxed	None	Single-cell	17649332	5769094	587834	30545	597	307	43331			0.574028
COHNT	Relaxed-Dedup-SingleCell	Soil_viruses_Abisko	F.10-14	Virus fraction	Accel-NGS 1S Plus	18	Relaxed	Read deduplication	Single-cell	18399532	6165308	745617	31388	611	308	47251			0.57517
COHNT	Relaxed-Norm-SingleCell	Soil_viruses_Abisko	F.10-14	Virus fraction	Accel-NGS 1S Plus	18	Relaxed	Read normalization	Single-cell	17055268	5423101	539577	29968	583	306	41424			0.573489
COHNU	Strict-None-Meta	Soil_viruses_Abisko	F.20-24	Virus fraction	Accel-NGS 1S Plus	18	Strict	None	Metagenome	2550271	186377		6469	365	290	4127			0.735294
COHNU	Strict-Dedup-Meta	Soil_viruses_Abisko	F.20-24	Virus fraction	Accel-NGS 1S Plus	18	Strict	Read deduplication	Metagenome	2439746	155346		6239	364	290	4771			0.672131
COHNU	Strict-Norm-Meta	Soil_viruses_Abisko	F.20-24	Virus fraction	Accel-NGS 1S Plus	18	Strict	Read normalization	Metagenome	2429111	164718		6221	361	290	7843			0.698413
COHNU	Strict-None-SingleCell	Soil_viruses_Abisko	F.20-24	Virus fraction	Accel-NGS 1S Plus	18	Strict	None	Single-cell	2501594	199752		6251	367	291	4570			0.653846
COHNU	Strict-Dedup-SingleCell	Soil_viruses_Abisko	F.20-24	Virus fraction	Accel-NGS 1S Plus	18	Strict	Read deduplication	Single-cell	2551740	204650		6535	366	289	8772			0.682353
COHNU	Strict-Norm-SingleCell	Soil_viruses_Abisko	F.20-24	Virus fraction	Accel-NGS 1S Plus	18	Strict	Read normalization	Single-cell	2188929	173979		5490	365	291	4152			0.646154
COHNU	Relaxed-None-Meta	Soil_viruses_Abisko	F.20-24	Virus fraction	Accel-NGS 1S Plus	18	Relaxed	None	Metagenome	2924401	249228		7312	369	290	4771			0.663043
COHNU	Relaxed-Dedup-Meta	Soil_viruses_Abisko	F.20-24	Virus fraction	Accel-NGS 1S Plus	18	Relaxed	Read deduplication	Metagenome	2824843	238241		7061	370	290	4016			0.681818
COHNU	Relaxed-Norm-Meta	Soil_viruses_Abisko	F.20-24	Virus fraction	Accel-NGS 1S Plus	18	Relaxed	Read normalization	Metagenome	2621783	213457		6579	367	291	7170			0.657895
COHNU	Relaxed-None-SingleCell	Soil_viruses_Abisko	F.20-24	Virus fraction	Accel-NGS 1S Plus	18	Relaxed	None	Single-cell	2995487	277002		7401	369	290	3978			0.63
COHNU	Relaxed-Dedup-SingleCell	Soil_viruses_Abisko	F.20-24	Virus fraction	Accel-NGS 1S Plus	18	Relaxed	Read deduplication	Single-cell	3078158	269209		7765	369	289	6453			0.68
COHNU	Relaxed-Norm-SingleCell	Soil_viruses_Abisko	F.20-24	Virus fraction	Accel-NGS 1S Plus	18	Relaxed	Read normalization	Single-cell	2415781	234644		5938	370	291	5988			0.604938
COHNW	Strict-None-Meta	Soil_viruses_Abisko	F.30-34	Virus fraction	Accel-NGS 1S Plus	18	Strict	None	Metagenome	12299230	4530136	165017	20430	683	309	64056			0.609079
COHNW	Strict-Dedup-Meta	Soil_viruses_Abisko	F.30-34	Virus fraction	Accel-NGS 1S Plus	18	Strict	Read deduplication	Metagenome	12072937	4035468	56217	20700	646	310	17531			0.633935
COHNW	Strict-Norm-Meta	Soil_viruses_Abisko	F.30-34	Virus fraction	Accel-NGS 1S Plus	18	Strict	Read normalization	Metagenome	12321716	4076930	91799	21204	640	309	31501			0.636021
COHNW	Strict-None-SingleCell	Soil_viruses_Abisko	F.30-34	Virus fraction	Accel-NGS 1S Plus	18	Strict	None	Single-cell	11707873	5109645	206654	17877	805	313	29729			0.572852
COHNW	Strict-Dedup-SingleCell	Soil_viruses_Abisko	F.30-34	Virus fraction	Accel-NGS 1S Plus	18	Strict	Read deduplication	Single-cell	11888425	5410758	248453	17788	841	313	67891			0.550988
COHNW	Strict-Norm-SingleCell	Soil_viruses_Abisko	F.30-34	Virus fraction	Accel-NGS 1S Plus	18	Strict	Read normalization	Single-cell	11342595	4638698	117139	17780	762	313	23407			0.602262
COHNW	Relaxed-None-Meta	Soil_viruses_Abisko	F.30-34	Virus fraction	Accel-NGS 1S Plus	18	Relaxed	None	Metagenome	12822882	4865464	199317	21071	697	309	60756			0.593964
COHNW	Relaxed-Dedup-Meta	Soil_viruses_Abisko	F.30-34	Virus fraction	Accel-NGS 1S Plus	18	Relaxed	Read deduplication	Metagenome	12598557	4472547	88335	21239	666	309	22895			0.621128
COHNW	Relaxed-Norm-Meta	Soil_viruses_Abisko	F.30-34	Virus fraction	Accel-NGS 1S Plus	18	Relaxed	Read normalization	Metagenome	12571194	4315328	142265	21363	653	310	31501			0.638586
COHNW	Relaxed-None-SingleCell	Soil_viruses_Abisko	F.30-34	Virus fraction	Accel-NGS 1S Plus	18	Relaxed	None	Single-cell	12355508	5444533	300044	18808	812	310	67658			0.555076
COHNW	Relaxed-Dedup-SingleCell	Soil_viruses_Abisko	F.30-34	Virus fraction	Accel-NGS 1S Plus	18	Relaxed	Read deduplication	Single-cell	12898357	5762070	343284	19570	818	310	67887			0.539375
COHNW	Relaxed-Norm-SingleCell	Soil_viruses_Abisko	F.30-34	Virus fraction	Accel-NGS 1S Plus	18	Relaxed	Read normalization	Single-cell	11613582	4841220	152142	18055	775	313	23407			0.599741
COHNX	Strict-None-Meta	Soil_viruses_Abisko	F.10-14	Virus fraction	Accel-NGS 1S Plus	12	Strict	None	Metagenome	200690497	76755617	8888493	323636	665	311	81804			0.438395
COHNX	Strict-Dedup-Meta	Soil_viruses_Abisko	F.10-14	Virus fraction	Accel-NGS 1S Plus	12	Strict	Read deduplication	Metagenome	206863812	93642617	18723852	298595	823	315	92090			0.384806
COHNX	Strict-Norm-Meta	Soil_viruses_Abisko	F.10-14	Virus fraction	Accel-NGS 1S Plus	12	Strict	Read normalization	Metagenome	199288511	76671944	8848004	320113	670	311	69961			0.436575
COHNX	Strict-None-SingleCell	Soil_viruses_Abisko	F.10-14	Virus fraction	Accel-NGS 1S Plus	12	Strict	None	Single-cell	198562796	91178080	23193612	286476	843	314	102098			0.361892
COHNX	Strict-Dedup-SingleCell	Soil_viruses_Abisko	F.10-14	Virus fraction	Accel-NGS 1S Plus	12	Strict	Read deduplication	Single-cell	226447575	99753647	33512889	352701	774	307	1181809			0.353645
COHNX	Strict-Norm-SingleCell	Soil_viruses_Abisko	F.10-14	Virus fraction	Accel-NGS 1S Plus	12	Strict	Read normalization	Single-cell	196402343	91100580	24412312	277263	859	316	123515			0.350469
COHNX	Relaxed-None-Meta	Soil_viruses_Abisko	F.10-14	Virus fraction	Accel-NGS 1S Plus	12	Relaxed	None	Metagenome	234069532	95278586	19374484	361287	710	312	265809			0.406527
COHNX	Relaxed-Dedup-Meta	Soil_viruses_Abisko	F.10-14	Virus fraction	Accel-NGS 1S Plus	12	Relaxed	Read deduplication	Metagenome	241703952	109922274	34359943	343956	829	315	425286			0.360063
COHNX	Relaxed-Norm-Meta	Soil_viruses_Abisko	F.10-14	Virus fraction	Accel-NGS 1S Plus	12	Relaxed	Read normalization	Metagenome	226729518	94069799	19344514	345827	727	313	265809			0.39142
COHNX	Relaxed-None-SingleCell	Soil_viruses_Abisko	F.10-14	Virus fraction	Accel-NGS 1S Plus	12	Relaxed	None	Single-cell	233151326	105578994	29127661	333851	824	315	238022			0.370584
COHNX	Relaxed-Dedup-SingleCell	Soil_viruses_Abisko	F.10-14	Virus fraction	Accel-NGS 1S Plus	12	Relaxed	Read deduplication	Single-cell	262658399	113962624	38611393	385952	759	314	3035181			0.350238
COHNX	Relaxed-Norm-SingleCell	Soil_viruses_Abisko	F.10-14	Virus fraction	Accel-NGS 1S Plus	12	Relaxed	Read normalization	Single-cell	51108904	19821188	958116	83262	664	308	37433			0.464559
COHNY	Strict-None-Meta	Soil_viruses_Abisko	F.30-34	Virus fraction	Accel-NGS 1S Plus	12	Strict	None	Metagenome	190081311	76715099	10328365	294936	724	313	68785			0.423418
COHNY	Strict-Dedup-Meta	Soil_viruses_Abisko	F.30-34	Virus fraction	Accel-NGS 1S Plus	12	Strict	Read deduplication	Metagenome	192268645	91984537	23729144	264049	919	319	92365			0.366895
COHNY	Strict-Norm-Meta	Soil_viruses_Abisko	F.30-34	Virus fraction	Accel-NGS 1S Plus	12	Strict	Read normalization	Metagenome	188540581	76471462	10329800	291165	728	314	68763			0.415061
COHNY	Strict-None-SingleCell	Soil_viruses_Abisko	F.30-34	Virus fraction	Accel-NGS 1S Plus	12	Strict	None	Single-cell	190454782	90296266	25451649	264567	902	317	104833			0.348317
COHNY	Strict-Dedup-SingleCell	Soil_viruses_Abisko	F.30-34	Virus fraction	Accel-NGS 1S Plus	12	Strict	Read deduplication	Single-cell	209172126	97145436	33265939	302330	866	314	1500217			0.33232
COHNY	Strict-Norm-SingleCell	Soil_viruses_Abisko	F.30-34	Virus fraction	Accel-NGS 1S Plus	12	Strict	Read normalization	Single-cell	188499873	90207624	26371748	257739	918	319	123219			0.339703
COHNY	Relaxed-None-Meta	Soil_viruses_Abisko	F.30-34	Virus fraction	Accel-NGS 1S Plus	12	Relaxed	None	Metagenome	210006612	90521135	22860807	311130	778	314	258489			0.37199
COHNY	Relaxed-Dedup-Meta	Soil_viruses_Abisko	F.30-34	Virus fraction	Accel-NGS 1S Plus	12	Relaxed	Read deduplication	Metagenome	211976182	101818473	33477621	289004	924	318	616440			0.343226
COHNY	Relaxed-Norm-Meta	Soil_viruses_Abisko	F.30-34	Virus fraction	Accel-NGS 1S Plus	12	Relaxed	Read normalization	Metagenome	205858428	89979167	23019590	301288	794	316	258489			0.362634
COHNY	Relaxed-None-SingleCell	Soil_viruses_Abisko	F.30-34	Virus fraction	Accel-NGS 1S Plus	12	Relaxed	None	Single-cell	211163481	99904954	28667573	292296	897	318	108162			0.347616
COHNY	Relaxed-Dedup-SingleCell	Soil_viruses_Abisko	F.30-34	Virus fraction	Accel-NGS 1S Plus	12	Relaxed	Read deduplication	Single-cell	230421393	105819119	36172550	323691	849	318	1588121			0.338706
COHNY	Relaxed-Norm-SingleCell	Soil_viruses_Abisko	F.30-34	Virus fraction	Accel-NGS 1S Plus	12	Relaxed	Read normalization	Single-cell	206240155	99520540	29396635	280102	930	319	247591			0.351337
COHNZ	Strict-None-Meta	Soil_viruses_Abisko	P.10-14	Virus fraction	Accel-NGS 1S Plus	12	Strict	None	Metagenome	180228020	78608297	11073853	264303	805	320	1322607			0.43802
COHNZ	Strict-Dedup-Meta	Soil_viruses_Abisko	P.10-14	Virus fraction	Accel-NGS 1S Plus	12	Strict	Read deduplication	Metagenome	181526659	90842295	26747684	237447	1001	323	1500129			0.377097
COHNZ	Strict-Norm-Meta	Soil_viruses_Abisko	P.10-14	Virus fraction	Accel-NGS 1S Plus	12	Strict	Read normalization	Metagenome	177338100	78297944	11053570	257519	819	321	1293289			0.441263
COHNZ	Strict-None-SingleCell	Soil_viruses_Abisko	P.10-14	Virus fraction	Accel-NGS 1S Plus	12	Strict	None	Single-cell	184209122	91099705	28285150	243861	978	323	917613			0.360166
COHNZ	Strict-Dedup-SingleCell	Soil_viruses_Abisko	P.10-14	Virus fraction	Accel-NGS 1S Plus	12	Strict	Read deduplication	Single-cell	189417093	93393927	30058496	251522	970	323	1500129			0.367884
COHNZ	Strict-Norm-SingleCell	Soil_viruses_Abisko	P.10-14	Virus fraction	Accel-NGS 1S Plus	12	Strict	Read normalization	Single-cell	180694177	90735862	28363791	234319	1008	326	1533629			0.363189
COHNZ	Relaxed-None-Meta	Soil_viruses_Abisko	P.10-14	Virus fraction	Accel-NGS 1S Plus	12	Relaxed	None	Metagenome	267036912	120410787	31136712	378448	835	320	1293288			0.403593
COHNZ	Relaxed-Dedup-Meta	Soil_viruses_Abisko	P.10-14	Virus fraction	Accel-NGS 1S Plus	12	Relaxed	Read deduplication	Metagenome	273824880	131519564	41464446	369366	925	321	1293165			0.375143
COHNZ	Relaxed-Norm-Meta	Soil_viruses_Abisko	P.10-14	Virus fraction	Accel-NGS 1S Plus	12	Relaxed	Read normalization	Metagenome	245519742	116567493	30946106	333963	910	324	1324080			0.384745
COHNZ	Relaxed-None-SingleCell	Soil_viruses_Abisko	P.10-14	Virus fraction	Accel-NGS 1S Plus	12	Relaxed	None	Single-cell	277958905	130644257	41759878	380572	887	321	1293302			0.368968
COHNZ	Relaxed-Dedup-SingleCell	Soil_viruses_Abisko	P.10-14	Virus fraction	Accel-NGS 1S Plus	12	Relaxed	Read deduplication	Single-cell	291370922	133788031	44506626	405266	849	320	1500130			0.360437
COHNZ	Relaxed-Norm-SingleCell	Soil_viruses_Abisko	P.10-14	Virus fraction	Accel-NGS 1S Plus	12	Relaxed	Read normalization	Single-cell	252951549	127069876	41589488	326907	1010	326	1500404			0.353357
COHOA	Strict-None-Meta	Soil_viruses_Abisko	P.1-5	Virus fraction	Nextera XT	12	Strict	None	Metagenome	542433432	73472692	2515302	1237885	413	286	44678			0.581228
COHOA	Strict-Dedup-Meta	Soil_viruses_Abisko	P.1-5	Virus fraction	Nextera XT	12	Strict	Read deduplication	Metagenome	511771666	80934445	3936541	1079614	456	297	44678			0.578505
COHOA	Strict-Norm-Meta	Soil_viruses_Abisko	P.1-5	Virus fraction	Nextera XT	12	Strict	Read normalization	Metagenome	526318864	72712959	4341177	1192738	414	287	44678			0.548702
COHOA	Strict-None-SingleCell	Soil_viruses_Abisko	P.1-5	Virus fraction	Nextera XT	12	Strict	None	Single-cell	541524361	91007645	11635969	1169018	438	287	52423			0.548714
COHOA	Strict-Dedup-SingleCell	Soil_viruses_Abisko	P.1-5	Virus fraction	Nextera XT	12	Strict	Read deduplication	Single-cell	600094352	109816672	14226495	1225227	474	295	61723			0.574996
COHOA	Strict-Norm-SingleCell	Soil_viruses_Abisko	P.1-5	Virus fraction	Nextera XT	12	Strict	Read normalization	Single-cell	529968476	89219849	11355034	1145419	437	287	45635			0.547933
COHOA	Relaxed-None-Meta	Soil_viruses_Abisko	P.1-5	Virus fraction	Nextera XT	12	Relaxed	None	Metagenome	593657629	83948327	5684523	1331561	420	287	47604			0.560032
COHOA	Relaxed-Dedup-Meta	Soil_viruses_Abisko	P.1-5	Virus fraction	Nextera XT	12	Relaxed	Read deduplication	Metagenome	591814610	98228730	6310782	1222436	469	301	44678			0.588305
COHOA	Relaxed-Norm-Meta	Soil_viruses_Abisko	P.1-5	Virus fraction	Nextera XT	12	Relaxed	Read normalization	Metagenome	576785254	82735663	5654762	1292088	421	287	44678			0.560118
COHOA	Relaxed-None-SingleCell	Soil_viruses_Abisko	P.1-5	Virus fraction	Nextera XT	12	Relaxed	None	Single-cell	603538718	106106854	14306319	1284932	446	288	56529			0.554942
COHOA	Relaxed-Dedup-SingleCell	Soil_viruses_Abisko	P.1-5	Virus fraction	Nextera XT	12	Relaxed	Read deduplication	Single-cell	681184729	125202687	16350752	1379264	478	301	60410			0.581515
COHOA	Relaxed-Norm-SingleCell	Soil_viruses_Abisko	P.1-5	Virus fraction	Nextera XT	12	Relaxed	Read normalization	Single-cell	583433781	103608778	13937396	1241698	446	288	56529			0.55659
COHOB	Strict-None-Meta	Soil_viruses_Abisko	P.20-24	Virus fraction	Nextera XT	12	Strict	None	Metagenome	426215465	75085678	2140517	927817	435	287	79203			0.604673
COHOB	Strict-Dedup-Meta	Soil_viruses_Abisko	P.20-24	Virus fraction	Nextera XT	12	Strict	Read deduplication	Metagenome	397431351	78189891	2379276	811108	472	296	79203			0.604227
COHOB	Strict-Norm-Meta	Soil_viruses_Abisko	P.20-24	Virus fraction	Nextera XT	12	Strict	Read normalization	Metagenome	417379630	72987499	2137977	907139	436	287	79203			0.604536
COHOB	Strict-None-SingleCell	Soil_viruses_Abisko	P.20-24	Virus fraction	Nextera XT	12	Strict	None	Single-cell	423659797	88127700	3684533	880331	459	288	97488			0.586945
COHOB	Strict-Dedup-SingleCell	Soil_viruses_Abisko	P.20-24	Virus fraction	Nextera XT	12	Strict	Read deduplication	Single-cell	458394843	98351133	4217390	920649	482	293	79203			0.58829
COHOB	Strict-Norm-SingleCell	Soil_viruses_Abisko	P.20-24	Virus fraction	Nextera XT	12	Strict	Read normalization	Single-cell	416999550	86699960	3632007	867046	458	288	97488			0.57939
COHOB	Relaxed-None-Meta	Soil_viruses_Abisko	P.20-24	Virus fraction	Nextera XT	12	Relaxed	None	Metagenome	475958266	88117717	2951077	1019624	443	288	87616			0.600707
COHOB	Relaxed-Dedup-Meta	Soil_viruses_Abisko	P.20-24	Virus fraction	Nextera XT	12	Relaxed	Read deduplication	Metagenome	459775821	94643377	3368685	914809	487	302	112153			0.598851
COHOB	Relaxed-Norm-Meta	Soil_viruses_Abisko	P.20-24	Virus fraction	Nextera XT	12	Relaxed	Read normalization	Metagenome	455882473	84040906	2794041	976811	444	288	87616			0.595983
COHOB	Relaxed-None-SingleCell	Soil_viruses_Abisko	P.20-24	Virus fraction	Nextera XT	12	Relaxed	None	Single-cell	471837926	103241990	4933770	962697	470	289	111772			0.580415
COHOB	Relaxed-Dedup-SingleCell	Soil_viruses_Abisko	P.20-24	Virus fraction	Nextera XT	12	Relaxed	Read deduplication	Single-cell	524666154	113355353	5714675	1038873	487	300	112153			0.577065
COHOB	Relaxed-Norm-SingleCell	Soil_viruses_Abisko	P.20-24	Virus fraction	Nextera XT	12	Relaxed	Read normalization	Single-cell	458193610	100906020	4769777	934432	470	289	110273			0.569562
COHOC	Strict-None-Meta	Soil_viruses_Abisko	B.30-34	Virus fraction	Nextera XT	18	Strict	None	Metagenome	956895	3016		3178	286	279	2001			0.5
COHOC	Strict-Dedup-Meta	Soil_viruses_Abisko	B.30-34	Virus fraction	Nextera XT	18	Strict	Read deduplication	Metagenome	924839	3019		3053	286	279	2001			0.5
COHOC	Strict-Norm-Meta	Soil_viruses_Abisko	B.30-34	Virus fraction	Nextera XT	18	Strict	Read normalization	Metagenome	390416			1180	316	279	968			NA
COHOC	Strict-None-SingleCell	Soil_viruses_Abisko	B.30-34	Virus fraction	Nextera XT	18	Strict	None	Single-cell	924826	5624		3009	287	279	2001			0.5
COHOC	Strict-Dedup-SingleCell	Soil_viruses_Abisko	B.30-34	Virus fraction	Nextera XT	18	Strict	Read deduplication	Single-cell	1088409	4183		4321	285	131	2001			0.5
COHOC	Strict-Norm-SingleCell	Soil_viruses_Abisko	B.30-34	Virus fraction	Nextera XT	18	Strict	Read normalization	Single-cell	361854	2269		1053	322	281	1248			0.5
COHOC	Relaxed-None-Meta	Soil_viruses_Abisko	B.30-34	Virus fraction	Nextera XT	18	Relaxed	None	Metagenome	655681	1016		2061	298	279	1016			NA
COHOC	Relaxed-Dedup-Meta	Soil_viruses_Abisko	B.30-34	Virus fraction	Nextera XT	18	Relaxed	Read deduplication	Metagenome	633940	1016		1981	298	279	1016			NA
COHOC	Relaxed-Norm-Meta	Soil_viruses_Abisko	B.30-34	Virus fraction	Nextera XT	18	Relaxed	Read normalization	Metagenome	417247			1256	320	280	978			NA
COHOC	Relaxed-None-SingleCell	Soil_viruses_Abisko	B.30-34	Virus fraction	Nextera XT	18	Relaxed	None	Single-cell	679073	3055		2055	307	281	2001			0.5
COHOC	Relaxed-Dedup-SingleCell	Soil_viruses_Abisko	B.30-34	Virus fraction	Nextera XT	18	Relaxed	Read deduplication	Single-cell	1004785	3055		4475	286	129	2001			0.5
COHOC	Relaxed-Norm-SingleCell	Soil_viruses_Abisko	B.30-34	Virus fraction	Nextera XT	18	Relaxed	Read normalization	Single-cell	403945	1248		1176	323	281	1248			0
COHOG	Strict-None-Meta	Soil_viruses_Abisko	F.10-14	Virus fraction	Nextera XT	18	Strict	None	Metagenome	11159369	2210021	145022	24422	435	286	22898			0.441964
COHOG	Strict-Dedup-Meta	Soil_viruses_Abisko	F.10-14	Virus fraction	Nextera XT	18	Strict	Read deduplication	Metagenome	10634678	1941556	76637	23063	440	289	17909			0.489221
COHOG	Strict-Norm-Meta	Soil_viruses_Abisko	F.10-14	Virus fraction	Nextera XT	18	Strict	Read normalization	Metagenome	11321002	2140028	111779	24840	437	287	24669			0.457831
COHOG	Strict-None-SingleCell	Soil_viruses_Abisko	F.10-14	Virus fraction	Nextera XT	18	Strict	None	Single-cell	10498895	2654751	442391	20897	467	290	47220			0.384425
COHOG	Strict-Dedup-SingleCell	Soil_viruses_Abisko	F.10-14	Virus fraction	Nextera XT	18	Strict	Read deduplication	Single-cell	10794685	2727905	472455	21342	473	291	56756			0.383313
COHOG	Strict-Norm-SingleCell	Soil_viruses_Abisko	F.10-14	Virus fraction	Nextera XT	18	Strict	Read normalization	Single-cell	10458567	2622331	396023	20853	467	290	36792			0.40201
COHOG	Relaxed-None-Meta	Soil_viruses_Abisko	F.10-14	Virus fraction	Nextera XT	18	Relaxed	None	Metagenome	11564316	2190126	128024	25493	433	286	20097			0.455474
COHOG	Relaxed-Dedup-Meta	Soil_viruses_Abisko	F.10-14	Virus fraction	Nextera XT	18	Relaxed	Read deduplication	Metagenome	10810004	2127031	44148	22736	453	292	20994			0.482857
COHOG	Relaxed-Norm-Meta	Soil_viruses_Abisko	F.10-14	Virus fraction	Nextera XT	18	Relaxed	Read normalization	Metagenome	11617252	2167576	128072	25538	435	287	22786			0.469298
COHOG	Relaxed-None-SingleCell	Soil_viruses_Abisko	F.10-14	Virus fraction	Nextera XT	18	Relaxed	None	Single-cell	10953143	2662052	473582	21987	462	290	31980			0.386897
COHOG	Relaxed-Dedup-SingleCell	Soil_viruses_Abisko	F.10-14	Virus fraction	Nextera XT	18	Relaxed	Read deduplication	Single-cell	11316000	2778811	410082	22452	472	294	37775			0.404077
COHOG	Relaxed-Norm-SingleCell	Soil_viruses_Abisko	F.10-14	Virus fraction	Nextera XT	18	Relaxed	Read normalization	Single-cell	10765264	2641651	469209	21532	464	290	37777			0.404969
COHOH	Strict-None-Meta	Soil_viruses_Abisko	F.20-24	Virus fraction	Nextera XT	18	Strict	None	Metagenome	717754	3336		2362	288	278	2244			0.333333
COHOH	Strict-Dedup-Meta	Soil_viruses_Abisko	F.20-24	Virus fraction	Nextera XT	18	Strict	Read deduplication	Metagenome	633143	4272		2046	288	279	2150			0.333333
COHOH	Strict-Norm-Meta	Soil_viruses_Abisko	F.20-24	Virus fraction	Nextera XT	18	Strict	Read normalization	Metagenome	363206	3249		1167	300	278	2157			0.333333
COHOH	Strict-None-SingleCell	Soil_viruses_Abisko	F.20-24	Virus fraction	Nextera XT	18	Strict	None	Single-cell	705224	3177		2267	288	279	2085			0.333333
COHOH	Strict-Dedup-SingleCell	Soil_viruses_Abisko	F.20-24	Virus fraction	Nextera XT	18	Strict	Read deduplication	Single-cell	719418	3177		2506	288	278	2085			0.333333
COHOH	Strict-Norm-SingleCell	Soil_viruses_Abisko	F.20-24	Virus fraction	Nextera XT	18	Strict	Read normalization	Single-cell	331789	3249		1000	310	280	2157			0.333333
COHOH	Relaxed-None-Meta	Soil_viruses_Abisko	F.20-24	Virus fraction	Nextera XT	18	Relaxed	None	Metagenome	535271	3875		1692	299	279	1544			0.333333
COHOH	Relaxed-Dedup-Meta	Soil_viruses_Abisko	F.20-24	Virus fraction	Nextera XT	18	Relaxed	Read deduplication	Metagenome	497945	2331		1529	305	280	1239			0.333333
COHOH	Relaxed-Norm-Meta	Soil_viruses_Abisko	F.20-24	Virus fraction	Nextera XT	18	Relaxed	Read normalization	Metagenome	386405	2596		1228	305	278	1504			0.333333
COHOH	Relaxed-None-SingleCell	Soil_viruses_Abisko	F.20-24	Virus fraction	Nextera XT	18	Relaxed	None	Single-cell	546865	4514		1655	307	281	2251			0.333333
COHOH	Relaxed-Dedup-SingleCell	Soil_viruses_Abisko	F.20-24	Virus fraction	Nextera XT	18	Relaxed	Read deduplication	Single-cell	607762	3343		2202	295	135	2251			0.333333
COHOH	Relaxed-Norm-SingleCell	Soil_viruses_Abisko	F.20-24	Virus fraction	Nextera XT	18	Relaxed	Read normalization	Single-cell	357133	2849		1078	311	280	1757			0.333333
COHON	Strict-None-Meta	Soil_viruses_Abisko	F.30-34	Virus fraction	Nextera XT	18	Strict	None	Metagenome	738805	12039		2372	289	278	2074			0.25
COHON	Strict-Dedup-Meta	Soil_viruses_Abisko	F.30-34	Virus fraction	Nextera XT	18	Strict	Read deduplication	Metagenome	668957	11098		2121	289	279	1848			0.25
COHON	Strict-Norm-Meta	Soil_viruses_Abisko	F.30-34	Virus fraction	Nextera XT	18	Strict	Read normalization	Metagenome	425466	8615		1360	297	278	1624			0.2
COHON	Strict-None-SingleCell	Soil_viruses_Abisko	F.30-34	Virus fraction	Nextera XT	18	Strict	None	Single-cell	724190	15988		2235	290	280	1757			0.5
COHON	Strict-Dedup-SingleCell	Soil_viruses_Abisko	F.30-34	Virus fraction	Nextera XT	18	Strict	Read deduplication	Single-cell	751796	11830		2628	288	247	1699			0.75
COHON	Strict-Norm-SingleCell	Soil_viruses_Abisko	F.30-34	Virus fraction	Nextera XT	18	Strict	Read normalization	Single-cell	379657	9827		1123	306	280	1624			0.2
COHON	Relaxed-None-Meta	Soil_viruses_Abisko	F.30-34	Virus fraction	Nextera XT	18	Relaxed	None	Metagenome	674957	6559		2116	296	279	2081			0.333333
COHON	Relaxed-Dedup-Meta	Soil_viruses_Abisko	F.30-34	Virus fraction	Nextera XT	18	Relaxed	Read deduplication	Metagenome	616709	6339		1874	300	280	2081			0.333333
COHON	Relaxed-Norm-Meta	Soil_viruses_Abisko	F.30-34	Virus fraction	Nextera XT	18	Relaxed	Read normalization	Metagenome	456991	8445		1452	297	278	1569			0.25
COHON	Relaxed-None-SingleCell	Soil_viruses_Abisko	F.30-34	Virus fraction	Nextera XT	18	Relaxed	None	Single-cell	694862	15100		2069	305	281	1581			0.333333
COHON	Relaxed-Dedup-SingleCell	Soil_viruses_Abisko	F.30-34	Virus fraction	Nextera XT	18	Relaxed	Read deduplication	Single-cell	827165	13909		3124	291	133	1844			0.4
COHON	Relaxed-Norm-SingleCell	Soil_viruses_Abisko	F.30-34	Virus fraction	Nextera XT	18	Relaxed	Read normalization	Single-cell	424683	14088		1251	308	280	1844			0.285714
COHOO	Strict-None-Meta	Soil_viruses_Abisko	F.10-14	Virus fraction	Nextera XT	12	Strict	None	Metagenome	264980276	82736023	20861118	482310	546	290	825304			0.340817
COHOO	Strict-Dedup-Meta	Soil_viruses_Abisko	F.10-14	Virus fraction	Nextera XT	12	Strict	Read deduplication	Metagenome	254596540	85948228	21466390	433162	597	306	825304			0.344766
COHOO	Strict-Norm-Meta	Soil_viruses_Abisko	F.10-14	Virus fraction	Nextera XT	12	Strict	Read normalization	Metagenome	252495534	81109213	20535606	454100	558	290	825304			0.340095
COHOO	Strict-None-SingleCell	Soil_viruses_Abisko	F.10-14	Virus fraction	Nextera XT	12	Strict	None	Single-cell	268480026	93340986	25249472	458182	597	295	825304			0.338102
[truncated: 32 more rows]
